# Supplementary material
Source: HighWire-hosted journal article supplement (doi:10.1101/rna.078925.121)
Supplement: Supplemental_Table_S1.xlsx [file Supplemental_Table_S1.xlsx]

## Sheet: Sheet1
Supplemental Table S1. rDNA loci positions and similarities on chromosome 21
Copy	Copy start	Copy stop	Length	% Identity
1	8205989	8219303	13313	99.8
2	8250198	8260973	10775	99
3	8389036	8402344	13309	99.4
4	8433222	8446572	13351	99.6
