# Supplementary material
Source: HighWire-hosted journal article supplement (doi:10.1101/rna.078925.121)
Supplement: Supplemental_Table_S2.xlsx [file Supplemental_Table_S2.xlsx]

## Sheet: Sheet1
Supplemental Table S2. Variant calls and QUAL scores for rDNA copy positions in 2,504 human genomes.
#CHROM	Position	Copy position	Domain	REF	ALT	QUAL	SNV_INDEL	INFO
chr21	8207885	1897	5'ETS	C	T	241.8	SNV	AC=6;AF=0.00144;AN=4178;BaseQRankSum=-0.000;ClippingRankSum=-0.000;DP=6793;ExcessHet=3.0925;FS=0.000;InbreedingCoeff=-0.0930;MLEAC=7;MLEAF=0.00168;MQ=21.38;MQRankSum=0.808;QD=5.90;ReadPosRankSum=0.366;SOR=0.326
chr21	8207926	1938	5'ETS	T	C	58.49	SNV	AC=3;AF=0.000617;AN=4866;BaseQRankSum=-0.674;ClippingRankSum=-0.000;DP=17012;ExcessHet=4.3682;FS=0.000;InbreedingCoeff=-0.0474;MLEAC=2;MLEAF=0.000411;MQ=25.14;MQRankSum=0.431;QD=2.66;ReadPosRankSum=0.292;SOR=0.074
chr21	8207954	1966	5'ETS	C	T	138.36	SNV	AC=11;AF=0.00223;AN=4934;BaseQRankSum=0.000;ClippingRankSum=0.000;DP=22108;ExcessHet=3.9677;FS=0.000;InbreedingCoeff=-0.0313;MLEAC=7;MLEAF=0.00142;MQ=24.52;MQRankSum=-0.000;QD=1.95;ReadPosRankSum=-0.000;SOR=0.108
chr21	8207957	1969	5'ETS	TCGCTCCGGGGCCCCCGGTGG	T	9616.01	INDEL	AC=110;AF=0.0223;AN=4922;BaseQRankSum=-0.000;ClippingRankSum=-0.000;DP=22395;ExcessHet=0.3998;FS=0.000;InbreedingCoeff=-0.0291;MLEAC=109;MLEAF=0.0221;MQ=24.86;MQRankSum=0.967;QD=9.24;ReadPosRankSum=-0.000;SOR=0.123
chr21	8207961	1973	5'ETS	TCCGGGGCCCCCGGTGGCGGGGCC	T,*	13121.4	INDEL	AC=9,109;AF=0.00188,0.0228;AN=4788;BaseQRankSum=0.566;ClippingRankSum=-0.000;DP=22154;ExcessHet=3.4645;FS=0.000;InbreedingCoeff=0.0550;MLEAC=9,115;MLEAF=0.00188,0.024;MQ=8.49;MQRankSum=1.164;QD=11.83;ReadPosRankSum=0.674;SOR=0.100
chr21	8207968	1980	5'ETS	C	T,*	10980.1	SNV	AC=2,116;AF=0.000407,0.0236;AN=4916;BaseQRankSum=0.625;ClippingRankSum=0.000;DP=27777;ExcessHet=2.1389;FS=0.000;InbreedingCoeff=0.0390;MLEAC=2,120;MLEAF=0.000407,0.0244;MQ=6.46;MQRankSum=0.734;QD=9.77;ReadPosRankSum=1.500;SOR=0.116
chr21	8207969	1981	5'ETS	C	T,*	10154.9	SNV	AC=3,116;AF=0.000606,0.0234;AN=4950;BaseQRankSum=-0.000;ClippingRankSum=-0.000;DP=28387;ExcessHet=1.5073;FS=0.000;InbreedingCoeff=0.0198;MLEAC=3,116;MLEAF=0.000606,0.0234;MQ=3.58;MQRankSum=-0.253;QD=9.23;ReadPosRankSum=-0.000;SOR=0.132
chr21	8207986	1998	5'ETS	C	T	6326.66	SNV	AC=165;AF=0.0331;AN=4984;BaseQRankSum=-0.000;ClippingRankSum=-0.000;DP=35936;ExcessHet=15.9197;FS=0.000;InbreedingCoeff=-0.0446;MLEAC=156;MLEAF=0.0313;MQ=23.43;MQRankSum=-0.728;QD=4.32;ReadPosRankSum=-0.000;SOR=0.151
chr21	8252204	2007	5'ETS	T	C	42.62	SNV	AC=4;AF=0.087;AN=46;DP=637;ExcessHet=0.0041;FS=0.000;InbreedingCoeff=0.0699;MLEAC=4;MLEAF=0.087;MQ=1.38;QD=21.31;SOR=2.303
chr21	8208003	2015	5'ETS	T	G	233.11	SNV	AC=39;AF=0.00814;AN=4792;BaseQRankSum=-1.465;ClippingRankSum=0.000;DP=38848;ExcessHet=639.7708;FS=0.000;InbreedingCoeff=-0.2471;MLEAC=72;MLEAF=0.015;MQ=20.52;MQRankSum=0.674;QD=0.80;ReadPosRankSum=0.253;SOR=0.027
chr21	8208012	2024	5'ETS	G	A	188.55	SNV	AC=10;AF=0.002;AN=4996;BaseQRankSum=-0.431;ClippingRankSum=-0.000;DP=41996;ExcessHet=3.9531;FS=0.000;InbreedingCoeff=-0.0131;MLEAC=7;MLEAF=0.0014;MQ=23.41;MQRankSum=0.140;QD=2.99;ReadPosRankSum=0.489;SOR=0.066
chr21	8208054	2066	5'ETS	A	C	5536.71	SNV	AC=96;AF=0.0238;AN=4036;BaseQRankSum=-0.674;ClippingRankSum=-0.000;DP=38299;ExcessHet=357.3215;FS=0.000;InbreedingCoeff=-0.2697;MLEAC=75;MLEAF=0.0186;MQ=13.71;MQRankSum=0.000;QD=11.30;ReadPosRankSum=-0.000;SOR=0.018
chr21	8208064	2076	5'ETS	T	G	3758.21	SNV	AC=164;AF=0.0462;AN=3550;BaseQRankSum=-0.903;ClippingRankSum=-0.000;DP=36865;ExcessHet=255.6790;FS=0.000;InbreedingCoeff=-0.2692;MLEAC=170;MLEAF=0.0479;MQ=12.51;MQRankSum=-0.000;QD=3.78;ReadPosRankSum=-0.000;SOR=0.050
chr21	8208066	2078	5'ETS	T	G	178.51	SNV	AC=46;AF=0.0103;AN=4460;BaseQRankSum=-1.162;ClippingRankSum=-0.000;DP=39064;ExcessHet=440.2674;FS=0.000;InbreedingCoeff=-0.2587;MLEAC=96;MLEAF=0.0215;MQ=13.80;MQRankSum=0.000;QD=1.20;ReadPosRankSum=-0.000;SOR=0.026
chr21	8208074	2086	5'ETS	G	A	422.43	SNV	AC=3;AF=0.000603;AN=4976;BaseQRankSum=0.751;ClippingRankSum=0.000;DP=40840;ExcessHet=3.6260;FS=0.000;InbreedingCoeff=-0.0188;MLEAC=2;MLEAF=0.000402;MQ=25.82;MQRankSum=1.136;QD=5.09;ReadPosRankSum=-0.914;SOR=0.216
chr21	8208076	2088	5'ETS	T	G	33.06	SNV	AC=6;AF=0.00129;AN=4636;BaseQRankSum=-1.207;ClippingRankSum=0.000;DP=42313;ExcessHet=508.5444;FS=0.000;InbreedingCoeff=-0.2509;MLEAC=12;MLEAF=0.00259;MQ=9.36;MQRankSum=-0.000;QD=1.03;ReadPosRankSum=0.035;SOR=0.017
chr21	8208092	2104	5'ETS	T	G	4524.06	SNV	AC=203;AF=0.0631;AN=3218;BaseQRankSum=-0.712;ClippingRankSum=-0.000;DP=38526;ExcessHet=163.6703;FS=0.000;InbreedingCoeff=-0.2471;MLEAC=223;MLEAF=0.0693;MQ=12.25;MQRankSum=0.000;QD=3.68;ReadPosRankSum=0.180;SOR=0.086
chr21	8208094	2106	5'ETS	T	G	1961.11	SNV	AC=89;AF=0.0252;AN=3532;BaseQRankSum=-1.098;ClippingRankSum=0.000;DP=38199;ExcessHet=136.1808;FS=0.000;InbreedingCoeff=-0.2094;MLEAC=73;MLEAF=0.0207;MQ=12.79;MQRankSum=-0.000;QD=4.85;ReadPosRankSum=0.253;SOR=0.027
chr21	8208095	2107	5'ETS	T	G	2674.42	SNV	AC=33;AF=0.00927;AN=3558;BaseQRankSum=-1.282;ClippingRankSum=0.000;DP=40464;ExcessHet=193.2084;FS=0.000;InbreedingCoeff=-0.2119;MLEAC=15;MLEAF=0.00422;MQ=8.32;MQRankSum=0.000;QD=18.07;ReadPosRankSum=0.253;SOR=0.032
chr21	8252320	2123	5'ETS	C	G,T	187.9	SNV	AC=5,3;AF=0.00101,0.000604;AN=4970;BaseQRankSum=-0.000;ClippingRankSum=-0.000;DP=26292;ExcessHet=0.0126;FS=0.000;InbreedingCoeff=0.0367;MLEAC=5,2;MLEAF=0.00101,0.000402;MQ=21.45;MQRankSum=-0.000;QD=2.02;ReadPosRankSum=-0.407;SOR=0.501
chr21	8208131	2143	5'ETS	G	T	23321.5	SNV	AC=177;AF=0.113;AN=1570;BaseQRankSum=-0.000;ClippingRankSum=-0.000;DP=32981;ExcessHet=0.0000;FS=0.000;InbreedingCoeff=0.1550;MLEAC=162;MLEAF=0.103;MQ=6.94;MQRankSum=-1.150;QD=24.73;ReadPosRankSum=0.126;SOR=4.362
chr21	8391178	2143	5'ETS	G	C	89.3	SNV	AC=4;AF=0.0833;AN=48;DP=398;ExcessHet=0.0034;FS=0.000;InbreedingCoeff=0.1731;MLEAC=3;MLEAF=0.0625;MQ=3.99;QD=22.32;SOR=3.258
chr21	8208136	2148	5'ETS	C	T	1704.12	SNV	AC=28;AF=0.00559;AN=5008;BaseQRankSum=0.000;ClippingRankSum=0.000;DP=79425;ExcessHet=3.5590;FS=0.000;InbreedingCoeff=-0.0076;MLEAC=23;MLEAF=0.00459;MQ=22.17;MQRankSum=0.622;QD=2.61;ReadPosRankSum=2.420;SOR=0.020
chr21	8208141	2153	5'ETS	C	G	1232.26	SNV	AC=13;AF=0.0026;AN=5008;BaseQRankSum=0.000;ClippingRankSum=0.000;DP=108649;ExcessHet=3.1588;FS=0.000;InbreedingCoeff=-0.0034;MLEAC=9;MLEAF=0.0018;MQ=22.13;MQRankSum=0.873;QD=1.84;ReadPosRankSum=-0.322;SOR=0.032
chr21	8252350	2153	5'ETS	C	G	169.5	SNV	AC=11;AF=0.0022;AN=4990;BaseQRankSum=-0.000;ClippingRankSum=0.000;DP=35912;ExcessHet=3.1593;FS=0.000;InbreedingCoeff=-0.0094;MLEAC=8;MLEAF=0.0016;MQ=21.43;MQRankSum=-0.000;QD=0.86;ReadPosRankSum=0.142;SOR=0.055
chr21	8208142	2154	5'ETS	C	CGCT	19261.2	INDEL	AC=15;AF=0.003;AN=5008;BaseQRankSum=0.000;ClippingRankSum=0.000;DP=111093;ExcessHet=3.1146;FS=0.000;InbreedingCoeff=-0.0032;MLEAC=15;MLEAF=0.003;MQ=29.26;MQRankSum=2.970;QD=12.82;ReadPosRankSum=3.473;SOR=0.239
chr21	8208144	2156	5'ETS	C	G	309.47	SNV	AC=3;AF=0.000599;AN=5008;BaseQRankSum=0.000;ClippingRankSum=0.000;DP=116029;ExcessHet=3.0155;FS=0.000;InbreedingCoeff=-0.0008;MLEAC=3;MLEAF=0.000599;MQ=22.12;MQRankSum=0.744;QD=1.96;ReadPosRankSum=0.142;SOR=0.040
chr21	8252353	2156	5'ETS	C	G	41.23	SNV	AC=3;AF=0.000601;AN=4992;BaseQRankSum=0.000;ClippingRankSum=0.000;DP=35894;ExcessHet=3.0155;FS=0.000;InbreedingCoeff=-0.0072;MLEAC=2;MLEAF=0.000401;MQ=21.82;MQRankSum=0.186;QD=0.90;ReadPosRankSum=0.000;SOR=0.105
chr21	8208165	2177	5'ETS	T	C	179132	SNV	AC=547;AF=0.109;AN=5008;BaseQRankSum=0.414;ClippingRankSum=0.000;DP=191683;ExcessHet=168.3537;FS=0.000;InbreedingCoeff=-0.1287;MLEAC=544;MLEAF=0.109;MQ=22.57;MQRankSum=-0.249;QD=2.58;ReadPosRankSum=-0.132;SOR=0.050
chr21	8252374	2177	5'ETS	T	C,*	22618.7	SNV	AC=450,1;AF=0.0904,0.000201;AN=4978;BaseQRankSum=0.000;ClippingRankSum=0.000;DP=35366;ExcessHet=77.9385;FS=0.000;InbreedingCoeff=-0.0710;MLEAC=448,1;MLEAF=0.09,0.000201;MQ=21.58;MQRankSum=-0.000;QD=3.31;ReadPosRankSum=-0.000;SOR=0.501
chr21	8208176	2188	5'ETS	T	TC	760.29	SNV	AC=6;AF=0.0012;AN=5008;BaseQRankSum=0.000;ClippingRankSum=0.000;DP=203692;ExcessHet=3.0580;FS=0.000;InbreedingCoeff=-0.0017;MLEAC=6;MLEAF=0.0012;MQ=22.71;MQRankSum=0.875;QD=1.05;ReadPosRankSum=0.619;SOR=0.013
chr21	8252385	2188	5'ETS	T	TC,*	571.23	SNV	AC=10,4;AF=0.00201,0.000803;AN=4984;BaseQRankSum=-0.000;ClippingRankSum=-0.000;DP=35236;ExcessHet=3.0933;FS=0.000;InbreedingCoeff=0.0111;MLEAC=6,4;MLEAF=0.0012,0.000803;MQ=19.71;MQRankSum=0.253;QD=2.90;ReadPosRankSum=0.399;SOR=0.321
chr21	8208183	2195	5'ETS	C	T	2599.59	SNV	AC=12;AF=0.0024;AN=5008;BaseQRankSum=0.000;ClippingRankSum=0.000;DP=204716;ExcessHet=3.0781;FS=0.000;InbreedingCoeff=-0.0025;MLEAC=11;MLEAF=0.0022;MQ=21.96;MQRankSum=0.433;QD=1.98;ReadPosRankSum=-0.289;SOR=0.033
chr21	8252392	2195	5'ETS	C	T,*	181.66	SNV	AC=11,3;AF=0.00221,0.000602;AN=4986;BaseQRankSum=0.000;ClippingRankSum=0.000;DP=34714;ExcessHet=3.0917;FS=0.000;InbreedingCoeff=0.0072;MLEAC=4,3;MLEAF=0.000802,0.000602;MQ=19.31;MQRankSum=-0.366;QD=1.11;ReadPosRankSum=-0.000;SOR=0.064
chr21	8208186	2198	5'ETS	T	TCGCC,C	265542	INDEL	AC=380,37;AF=0.0759,0.00739;AN=5008;BaseQRankSum=-1.052;ClippingRankSum=0.000;DP=235557;ExcessHet=85.9609;FS=0.000;InbreedingCoeff=-0.0899;MLEAC=380,35;MLEAF=0.0759,0.00699;MQ=22.30;MQRankSum=-0.272;QD=4.22;ReadPosRankSum=-0.011;SOR=0.034
chr21	8252395	2198	5'ETS	T	TCGCC,C,*	20892.8	INDEL	AC=166,30,3;AF=0.0334,0.00604,0.000604;AN=4970;BaseQRankSum=0.000;ClippingRankSum=0.000;DP=33564;ExcessHet=24.9724;FS=0.000;InbreedingCoeff=0.0420;MLEAC=173,26,3;MLEAF=0.0348,0.00523,0.000604;MQ=21.35;MQRankSum=-0.178;QD=6.46;ReadPosRankSum=0.151;SOR=1.174
chr21	8208191	2203	5'ETS	C	G	792.53	SNV	AC=4;AF=0.000799;AN=5008;BaseQRankSum=0.000;ClippingRankSum=0.000;DP=237848;ExcessHet=3.0155;FS=0.000;InbreedingCoeff=-0.0008;MLEAC=4;MLEAF=0.000799;MQ=22.03;MQRankSum=0.986;QD=1.62;ReadPosRankSum=0.648;SOR=0.029
chr21	8252400	2203	5'ETS	C	G	124.51	SNV	AC=4;AF=0.000802;AN=4986;BaseQRankSum=0.000;ClippingRankSum=0.000;DP=33626;ExcessHet=3.0190;FS=4.131;InbreedingCoeff=-0.0099;MLEAC=3;MLEAF=0.000602;MQ=21.18;MQRankSum=0.570;QD=2.77;ReadPosRankSum=-0.292;SOR=0.072
chr21	8252402	2205	5'ETS	T	G	136.38	SNV	AC=15;AF=0.00302;AN=4974;BaseQRankSum=-1.981;ClippingRankSum=0.000;DP=34137;ExcessHet=19.9713;FS=0.000;InbreedingCoeff=-0.0559;MLEAC=4;MLEAF=0.000804;MQ=21.35;MQRankSum=0.409;QD=0.88;ReadPosRankSum=-0.000;SOR=2.500
chr21	8252406	2209	5'ETS	T	G	55.61	SNV	AC=4;AF=0.000804;AN=4978;BaseQRankSum=-2.012;ClippingRankSum=-0.000;DP=33701;ExcessHet=6.8811;FS=0.000;InbreedingCoeff=-0.0350;MLEAC=2;MLEAF=0.000402;MQ=20.48;MQRankSum=-0.400;QD=1.74;ReadPosRankSum=0.000;SOR=0.591
chr21	8208207	2219	5'ETS	CCCGCCCG	C,*	961837	INDEL	AC=979,2;AF=0.195,0.000399;AN=5008;BaseQRankSum=0.000;ClippingRankSum=0.000;DP=283952;ExcessHet=529.7986;FS=0.000;InbreedingCoeff=-0.2437;MLEAC=980,2;MLEAF=0.196,0.000399;MQ=22.64;MQRankSum=0.202;QD=7.31;ReadPosRankSum=0.028;SOR=0.085
chr21	8252416	2219	5'ETS	CCCGCCCG	C	70101	INDEL	AC=491;AF=0.1;AN=4904;BaseQRankSum=0.000;ClippingRankSum=-0.000;DP=29632;ExcessHet=117.9587;FS=2.680;InbreedingCoeff=-0.1491;MLEAC=577;MLEAF=0.118;MQ=21.26;MQRankSum=0.000;QD=12.20;ReadPosRankSum=0.085;SOR=1.363
chr21	8208208	2220	5'ETS	C	A,*	962292	SNV	AC=1,979;AF=0.0002,0.195;AN=5008;BaseQRankSum=0.470;ClippingRankSum=0.000;DP=284435;ExcessHet=528.5795;FS=0.000;InbreedingCoeff=-0.2421;MLEAC=1,981;MLEAF=0.0002,0.196;MQ=1.19;MQRankSum=0.870;QD=7.32;ReadPosRankSum=1.600;SOR=0.085
chr21	8208209	2221	5'ETS	C	T,*	964676	SNV	AC=24,975;AF=0.00479,0.195;AN=5008;BaseQRankSum=-2.544;ClippingRankSum=0.000;DP=285871;ExcessHet=553.1787;FS=0.000;InbreedingCoeff=-0.2480;MLEAC=24,978;MLEAF=0.00479,0.195;MQ=3.69;MQRankSum=-0.230;QD=7.18;ReadPosRankSum=-0.275;SOR=0.084
chr21	8252418	2221	5'ETS	C	T,*	71096	SNV	AC=12,486;AF=0.00245,0.0993;AN=4896;BaseQRankSum=0.000;ClippingRankSum=0.000;DP=28781;ExcessHet=76.7051;FS=2.647;InbreedingCoeff=-0.0695;MLEAC=10,510;MLEAF=0.00204,0.104;MQ=4.17;MQRankSum=0.000;QD=12.26;ReadPosRankSum=0.000;SOR=1.264
chr21	8208210	2222	5'ETS	GCCCGC	ACCCGC,G,*	953289	INDEL	AC=3,2,970;AF=0.000599,0.000399,0.194;AN=5008;BaseQRankSum=0.305;ClippingRankSum=0.000;DP=287885;ExcessHet=529.4792;FS=0.000;InbreedingCoeff=-0.2362;MLEAC=3,2,974;MLEAF=0.000599,0.000399,0.194;MQ=1.96;MQRankSum=0.530;QD=7.29;ReadPosRankSum=0.655;SOR=0.085
chr21	8208215	2227	5'ETS	C	G,*	1091.85	SNV	AC=1,2;AF=0.000204,0.000408;AN=4906;BaseQRankSum=-2.108;ClippingRankSum=0.000;DP=301691;ExcessHet=3.0145;FS=0.000;InbreedingCoeff=0.0569;MLEAC=1,2;MLEAF=0.000204,0.000408;MQ=3.24;MQRankSum=0.222;QD=3.73;ReadPosRankSum=0.000;SOR=0.043
chr21	8208216	2228	5'ETS	C	T	218.93	SNV	AC=3;AF=0.000599;AN=5008;BaseQRankSum=0.000;ClippingRankSum=0.000;DP=292850;ExcessHet=3.0155;FS=0.000;InbreedingCoeff=-0.0007;MLEAC=2;MLEAF=0.000399;MQ=23.58;MQRankSum=-0.354;QD=0.50;ReadPosRankSum=0.033;SOR=0.011
chr21	8208217	2229	5'ETS	G	C	2004.03	SNV	AC=3;AF=0.000599;AN=5008;BaseQRankSum=0.711;ClippingRankSum=0.000;DP=293311;ExcessHet=3.0155;FS=0.000;InbreedingCoeff=-0.0007;MLEAC=3;MLEAF=0.000599;MQ=21.96;MQRankSum=0.257;QD=3.23;ReadPosRankSum=-0.087;SOR=0.043
chr21	8252434	2237	5'ETS	A	C	38.82	SNV	AC=7;AF=0.00141;AN=4950;BaseQRankSum=-0.842;ClippingRankSum=0.000;DP=26219;ExcessHet=19.0372;FS=0.000;InbreedingCoeff=-0.0591;MLEAC=4;MLEAF=0.000808;MQ=19.97;MQRankSum=0.000;QD=0.64;ReadPosRankSum=0.140;SOR=0.303
chr21	8208228	2240	5'ETS	CTCT	C,TTCT	6612.07	INDEL	AC=9,9;AF=0.0018,0.0018;AN=5008;BaseQRankSum=-0.810;ClippingRankSum=0.000;DP=293858;ExcessHet=3.1434;FS=0.000;InbreedingCoeff=-0.0036;MLEAC=9,9;MLEAF=0.0018,0.0018;MQ=21.97;MQRankSum=0.465;QD=3.13;ReadPosRankSum=-0.579;SOR=0.039
chr21	8252437	2240	5'ETS	CTCT	C	115.88	INDEL	AC=3;AF=0.000606;AN=4950;BaseQRankSum=-0.000;ClippingRankSum=-0.000;DP=25114;ExcessHet=3.8487;FS=0.000;InbreedingCoeff=-0.0271;MLEAC=3;MLEAF=0.000606;MQ=19.33;MQRankSum=-0.000;QD=3.62;ReadPosRankSum=-0.099;SOR=0.292
chr21	8208231	2243	5'ETS	T	C,*	5495.67	SNV	AC=3,9;AF=0.000599,0.0018;AN=5008;BaseQRankSum=1.909;ClippingRankSum=0.000;DP=294231;ExcessHet=3.0677;FS=0.000;InbreedingCoeff=-0.0024;MLEAC=3,9;MLEAF=0.000599,0.0018;MQ=10.23;MQRankSum=1.098;QD=4.03;ReadPosRankSum=1.080;SOR=0.043
chr21	8208235	2247	5'ETS	T	TC,C	2722.61	SNV	AC=9,6;AF=0.0018,0.0012;AN=5008;BaseQRankSum=-0.217;ClippingRankSum=0.000;DP=296928;ExcessHet=3.1024;FS=0.000;InbreedingCoeff=-0.0016;MLEAC=8,6;MLEAF=0.0016,0.0012;MQ=22.45;MQRankSum=0.361;QD=1.31;ReadPosRankSum=-0.577;SOR=0.023
chr21	8252444	2247	5'ETS	T	TC,C	226.26	SNV	AC=3,4;AF=0.00061,0.000813;AN=4918;BaseQRankSum=-0.000;ClippingRankSum=-0.000;DP=22780;ExcessHet=3.0331;FS=3.503;InbreedingCoeff=0.0450;MLEAC=3,2;MLEAF=0.00061,0.000407;MQ=19.13;MQRankSum=-0.000;QD=3.02;ReadPosRankSum=-0.000;SOR=0.110
chr21	8208239	2251	5'ETS	C	G	15050.6	SNV	AC=43;AF=0.00859;AN=5008;BaseQRankSum=-2.417;ClippingRankSum=0.000;DP=301722;ExcessHet=3.8375;FS=0.000;InbreedingCoeff=-0.0087;MLEAC=42;MLEAF=0.00839;MQ=22.08;MQRankSum=-0.345;QD=2.12;ReadPosRankSum=0.409;SOR=0.045
chr21	8252448	2251	5'ETS	C	G	292.48	SNV	AC=13;AF=0.00265;AN=4908;BaseQRankSum=-0.319;ClippingRankSum=-0.000;DP=20446;ExcessHet=3.9804;FS=4.926;InbreedingCoeff=-0.0385;MLEAC=12;MLEAF=0.00244;MQ=21.18;MQRankSum=-0.000;QD=2.00;ReadPosRankSum=0.674;SOR=2.036
chr21	8208241	2253	5'ETS	C	G,T,A	4573.03	SNV	AC=3,7,1;AF=0.000599,0.0014,0.0002;AN=5008;BaseQRankSum=-2.489;ClippingRankSum=0.000;DP=304303;ExcessHet=3.0581;FS=0.000;InbreedingCoeff=-0.0022;MLEAC=3,7,1;MLEAF=0.000599,0.0014,0.0002;MQ=21.92;MQRankSum=-0.838;QD=2.26;ReadPosRankSum=-0.219;SOR=0.039
chr21	8208242	2254	5'ETS	G	A	12464.6	SNV	AC=26;AF=0.00519;AN=5008;BaseQRankSum=-0.221;ClippingRankSum=0.000;DP=307130;ExcessHet=3.3640;FS=0.000;InbreedingCoeff=-0.0054;MLEAC=23;MLEAF=0.00459;MQ=22.03;MQRankSum=-0.258;QD=2.51;ReadPosRankSum=-0.370;SOR=0.070
chr21	8252451	2254	5'ETS	G	A	70.43	SNV	AC=6;AF=0.00123;AN=4870;BaseQRankSum=-0.000;ClippingRankSum=0.000;DP=18172;ExcessHet=4.8091;FS=0.000;InbreedingCoeff=-0.0514;MLEAC=4;MLEAF=0.000821;MQ=17.99;MQRankSum=0.000;QD=1.35;ReadPosRankSum=0.381;SOR=0.746
chr21	8208251	2263	5'ETS	A	G	114129	SNV	AC=149;AF=0.0298;AN=5008;BaseQRankSum=0.048;ClippingRankSum=0.000;DP=352430;ExcessHet=16.0939;FS=0.000;InbreedingCoeff=-0.0333;MLEAC=148;MLEAF=0.0296;MQ=21.90;MQRankSum=-0.452;QD=2.31;ReadPosRankSum=-0.082;SOR=0.052
chr21	8252460	2263	5'ETS	A	G	1447.53	SNV	AC=49;AF=0.0105;AN=4646;BaseQRankSum=0.282;ClippingRankSum=-0.000;DP=14468;ExcessHet=7.2472;FS=0.000;InbreedingCoeff=-0.1046;MLEAC=59;MLEAF=0.0127;MQ=20.12;MQRankSum=-0.000;QD=3.29;ReadPosRankSum=0.000;SOR=1.829
chr21	8208260	2272	5'ETS	AC	GC,A	6114.33	SNV	AC=5,1;AF=0.000998,0.0002;AN=5008;BaseQRankSum=0.149;ClippingRankSum=0.000;DP=358927;ExcessHet=3.0233;FS=0.000;InbreedingCoeff=-0.0011;MLEAC=5,1;MLEAF=0.000998,0.0002;MQ=21.91;MQRankSum=0.265;QD=3.44;ReadPosRankSum=-0.415;SOR=0.056
chr21	8208261	2273	5'ETS	C	T,*	3006.45	SNV	AC=2,1;AF=0.000399,0.0002;AN=5008;BaseQRankSum=-1.180;ClippingRankSum=0.000;DP=358949;ExcessHet=3.0129;FS=0.000;InbreedingCoeff=-0.0006;MLEAC=2,1;MLEAF=0.000399,0.0002;MQ=16.89;MQRankSum=0.462;QD=3.09;ReadPosRankSum=-0.208;SOR=0.039
chr21	8252476	2279	5'ETS	T	G	63.3	SNV	AC=11;AF=0.0104;AN=1058;BaseQRankSum=-0.385;ClippingRankSum=-0.000;DP=1990;ExcessHet=0.0008;FS=2.981;InbreedingCoeff=-0.2054;MLEAC=14;MLEAF=0.0132;MQ=11.70;MQRankSum=-0.000;QD=2.18;ReadPosRankSum=-0.000;SOR=2.133
chr21	8208271	2283	5'ETS	T	C,TG	530809	SNV	AC=468,13;AF=0.0935,0.0026;AN=5008;BaseQRankSum=0.957;ClippingRankSum=0.000;DP=538667;ExcessHet=118.7792;FS=0.000;InbreedingCoeff=-0.1016;MLEAC=470,11;MLEAF=0.0938,0.0022;MQ=21.93;MQRankSum=-0.069;QD=2.75;ReadPosRankSum=-0.187;SOR=0.068
chr21	8252480	2283	5'ETS	T	C	86.59	SNV	AC=4;AF=0.00881;AN=454;BaseQRankSum=1.282;ClippingRankSum=-0.000;DP=529;ExcessHet=0.0002;FS=0.000;InbreedingCoeff=-0.1679;MLEAC=4;MLEAF=0.00881;MQ=7.42;MQRankSum=-0.000;QD=12.37;ReadPosRankSum=-0.842;SOR=0.527
chr21	8208273	2285	5'ETS	G	GC	33023.6	SNV	AC=30;AF=0.00599;AN=5008;BaseQRankSum=0.245;ClippingRankSum=0.000;DP=557363;ExcessHet=3.4159;FS=0.000;InbreedingCoeff=-0.0061;MLEAC=29;MLEAF=0.00579;MQ=21.90;MQRankSum=-0.148;QD=3.97;ReadPosRankSum=-0.422;SOR=0.065
chr21	8208275	2287	5'ETS	CCCGCCTGGGACCGAACCCGGCA	C	15514.9	INDEL	AC=5;AF=0.000998;AN=5008;BaseQRankSum=0.630;ClippingRankSum=0.000;DP=559748;ExcessHet=3.0190;FS=0.000;InbreedingCoeff=-0.0010;MLEAC=5;MLEAF=0.000998;MQ=21.93;MQRankSum=0.625;QD=4.57;ReadPosRankSum=5.462;SOR=0.045
chr21	8208281	2293	5'ETS	T	C,*	19496.4	SNV	AC=4,5;AF=0.000799,0.000998;AN=5008;BaseQRankSum=2.353;ClippingRankSum=0.000;DP=560950;ExcessHet=3.0416;FS=0.000;InbreedingCoeff=-0.0018;MLEAC=4,5;MLEAF=0.000799,0.000998;MQ=12.41;MQRankSum=0.649;QD=3.89;ReadPosRankSum=0.861;SOR=0.055
chr21	8208283	2295	5'ETS	G	T,*	38855.9	SNV	AC=21,5;AF=0.00419,0.000998;AN=5008;BaseQRankSum=-1.985;ClippingRankSum=0.000;DP=565914;ExcessHet=3.2943;FS=0.000;InbreedingCoeff=-0.0048;MLEAC=21,5;MLEAF=0.00419,0.000998;MQ=19.12;MQRankSum=0.039;QD=2.75;ReadPosRankSum=0.504;SOR=0.058
chr21	8208285	2297	5'ETS	A	C,*	41135.5	SNV	AC=19,5;AF=0.00379,0.000998;AN=5008;BaseQRankSum=1.218;ClippingRankSum=0.000;DP=574810;ExcessHet=3.2512;FS=0.000;InbreedingCoeff=-0.0046;MLEAC=19,5;MLEAF=0.00379,0.000998;MQ=19.56;MQRankSum=-0.193;QD=2.71;ReadPosRankSum=-0.421;SOR=0.051
chr21	8208289	2301	5'ETS	A	G,*	16503.3	SNV	AC=1,5;AF=0.0002,0.000998;AN=5008;BaseQRankSum=1.335;ClippingRankSum=0.000;DP=574821;ExcessHet=3.0233;FS=0.000;InbreedingCoeff=-0.0011;MLEAC=1,5;MLEAF=0.0002,0.000998;MQ=7.19;MQRankSum=-0.627;QD=4.33;ReadPosRankSum=2.045;SOR=0.051
chr21	8208290	2302	5'ETS	A	AC,*	17046.8	SNV	AC=2,5;AF=0.000399,0.000998;AN=5008;BaseQRankSum=1.058;ClippingRankSum=0.000;DP=574989;ExcessHet=3.0285;FS=0.000;InbreedingCoeff=-0.0014;MLEAC=2,5;MLEAF=0.000399,0.000998;MQ=8.42;MQRankSum=0.724;QD=4.28;ReadPosRankSum=-0.258;SOR=0.049
chr21	8208293	2305	5'ETS	C	T,*	15871.3	SNV	AC=1,5;AF=0.0002,0.000998;AN=5008;BaseQRankSum=-1.583;ClippingRankSum=0.000;DP=575018;ExcessHet=3.0233;FS=0.000;InbreedingCoeff=-0.0012;MLEAC=1,5;MLEAF=0.0002,0.000998;MQ=7.67;MQRankSum=2.203;QD=4.09;ReadPosRankSum=-0.184;SOR=0.047
chr21	8208297	2309	5'ETS	A	G,*	16426.8	SNV	AC=2,5;AF=0.000399,0.000998;AN=5008;BaseQRankSum=1.785;ClippingRankSum=0.000;DP=575686;ExcessHet=3.0285;FS=0.000;InbreedingCoeff=-0.0014;MLEAC=2,5;MLEAF=0.000399,0.000998;MQ=13.64;MQRankSum=1.109;QD=2.95;ReadPosRankSum=0.671;SOR=0.038
chr21	8208298	2310	5'ETS	C	A	17006.1	SNV	AC=18;AF=0.00359;AN=5008;BaseQRankSum=-1.405;ClippingRankSum=0.000;DP=581973;ExcessHet=3.2502;FS=0.000;InbreedingCoeff=-0.0042;MLEAC=18;MLEAF=0.00359;MQ=21.91;MQRankSum=0.280;QD=2.31;ReadPosRankSum=-0.219;SOR=0.054
chr21	8208303	2315	5'ETS	T	G	14883.8	SNV	AC=21;AF=0.00419;AN=5008;BaseQRankSum=-0.973;ClippingRankSum=0.000;DP=590727;ExcessHet=3.3633;FS=0.000;InbreedingCoeff=-0.0051;MLEAC=20;MLEAF=0.00399;MQ=21.93;MQRankSum=2.187;QD=1.55;ReadPosRankSum=-0.527;SOR=0.044
chr21	8208304	2316	5'ETS	C	G	2082.52	SNV	AC=5;AF=0.000998;AN=5008;BaseQRankSum=-0.529;ClippingRankSum=0.000;DP=592980;ExcessHet=3.0233;FS=0.000;InbreedingCoeff=-0.0011;MLEAC=5;MLEAF=0.000998;MQ=21.92;MQRankSum=0.741;QD=0.78;ReadPosRankSum=0.111;SOR=0.026
chr21	8208305	2317	5'ETS	G	T	6814.84	SNV	AC=8;AF=0.0016;AN=5008;BaseQRankSum=-1.118;ClippingRankSum=0.000;DP=596202;ExcessHet=3.0416;FS=0.000;InbreedingCoeff=-0.0017;MLEAC=8;MLEAF=0.0016;MQ=21.92;MQRankSum=1.009;QD=1.72;ReadPosRankSum=0.394;SOR=0.050
chr21	8208308	2320	5'ETS	G	GGGC	14360.3	INDEL	AC=9;AF=0.0018;AN=5008;BaseQRankSum=-0.450;ClippingRankSum=0.000;DP=599636;ExcessHet=3.0416;FS=0.000;InbreedingCoeff=-0.0018;MLEAC=9;MLEAF=0.0018;MQ=21.93;MQRankSum=-0.575;QD=3.09;ReadPosRankSum=-0.368;SOR=0.026
chr21	8208310	2322	5'ETS	G	GCGC	35748.7	INDEL	AC=32;AF=0.00639;AN=5008;BaseQRankSum=0.352;ClippingRankSum=0.000;DP=601091;ExcessHet=3.4432;FS=0.000;InbreedingCoeff=-0.0064;MLEAC=32;MLEAF=0.00639;MQ=21.93;MQRankSum=-0.152;QD=2.71;ReadPosRankSum=0.000;SOR=0.020
chr21	8208312	2324	5'ETS	G	A	6278.49	SNV	AC=4;AF=0.000799;AN=5008;BaseQRankSum=-1.833;ClippingRankSum=0.000;DP=604014;ExcessHet=3.0155;FS=0.000;InbreedingCoeff=-0.0008;MLEAC=4;MLEAF=0.000799;MQ=21.93;MQRankSum=-0.023;QD=4.11;ReadPosRankSum=-1.077;SOR=0.089
chr21	8208314	2326	5'ETS	C	CGCA	9599.3	INDEL	AC=6;AF=0.0012;AN=5008;BaseQRankSum=0.346;ClippingRankSum=0.000;DP=604699;ExcessHet=3.0233;FS=0.000;InbreedingCoeff=-0.0012;MLEAC=6;MLEAF=0.0012;MQ=21.94;MQRankSum=0.291;QD=3.65;ReadPosRankSum=-0.982;SOR=0.020
chr21	8208318	2330	5'ETS	GCCGGCCA	ACCGGCCA,G	18997.6	INDEL	AC=22,1;AF=0.00439,0.0002;AN=5008;BaseQRankSum=1.088;ClippingRankSum=0.000;DP=612232;ExcessHet=3.2310;FS=0.000;InbreedingCoeff=-0.0044;MLEAC=22,1;MLEAF=0.00439,0.0002;MQ=21.94;MQRankSum=0.351;QD=1.73;ReadPosRankSum=-0.453;SOR=0.043
chr21	8208324	2336	5'ETS	C	T,*	8784.45	SNV	AC=2,1;AF=0.000399,0.0002;AN=5008;BaseQRankSum=-2.254;ClippingRankSum=0.000;DP=612644;ExcessHet=3.0129;FS=0.000;InbreedingCoeff=-0.0006;MLEAC=2,1;MLEAF=0.000399,0.0002;MQ=18.17;MQRankSum=0.654;QD=3.81;ReadPosRankSum=-0.891;SOR=0.059
chr21	8208325	2337	5'ETS	A	G,ACTGAT,*	977414	INDEL	AC=611,4,1;AF=0.122,0.000799,0.0002;AN=5008;BaseQRankSum=1.812;ClippingRankSum=0.000;DP=845536;ExcessHet=206.6066;FS=0.000;InbreedingCoeff=-0.1203;MLEAC=620,4,1;MLEAF=0.124,0.000799,0.0002;MQ=21.91;MQRankSum=-0.144;QD=2.95;ReadPosRankSum=0.481;SOR=0.079
chr21	8208329	2341	5'ETS	ATCGG	A	22217.8	INDEL	AC=11;AF=0.0022;AN=5008;BaseQRankSum=1.453;ClippingRankSum=0.000;DP=827234;ExcessHet=3.0581;FS=0.000;InbreedingCoeff=-0.0022;MLEAC=11;MLEAF=0.0022;MQ=21.93;MQRankSum=-0.066;QD=3.42;ReadPosRankSum=0.033;SOR=0.025
chr21	8208331	2343	5'ETS	C	G,*	94324.7	SNV	AC=60,11;AF=0.012,0.0022;AN=5008;BaseQRankSum=-0.009;ClippingRankSum=0.000;DP=834865;ExcessHet=5.2006;FS=0.000;InbreedingCoeff=-0.0140;MLEAC=60,11;MLEAF=0.012,0.0022;MQ=19.75;MQRankSum=-0.052;QD=2.67;ReadPosRankSum=0.516;SOR=0.032
chr21	8208332	2344	5'ETS	G	C,*	23356.8	SNV	AC=2,11;AF=0.000399,0.0022;AN=5008;BaseQRankSum=1.720;ClippingRankSum=0.000;DP=833573;ExcessHet=3.0781;FS=0.000;InbreedingCoeff=-0.0026;MLEAC=2,11;MLEAF=0.000399,0.0022;MQ=9.26;MQRankSum=1.492;QD=3.16;ReadPosRankSum=-0.506;SOR=0.025
chr21	8208345	2357	5'ETS	C	T	4879.46	SNV	AC=3;AF=0.000599;AN=5008;BaseQRankSum=-3.859;ClippingRankSum=0.000;DP=837520;ExcessHet=3.0155;FS=0.000;InbreedingCoeff=-0.0007;MLEAC=3;MLEAF=0.000599;MQ=21.95;MQRankSum=-0.626;QD=1.93;ReadPosRankSum=0.050;SOR=0.046
chr21	8208355	2367	5'ETS	C	T	5209.5	SNV	AC=5;AF=0.000998;AN=5008;BaseQRankSum=-3.271;ClippingRankSum=0.000;DP=841634;ExcessHet=3.0190;FS=0.000;InbreedingCoeff=-0.0010;MLEAC=5;MLEAF=0.000998;MQ=21.95;MQRankSum=0.964;QD=1.74;ReadPosRankSum=0.106;SOR=0.053
chr21	8208364	2376	5'ETS	T	TG,C	5515.52	SNV	AC=1,3;AF=0.0002,0.000599;AN=5008;BaseQRankSum=1.986;ClippingRankSum=0.000;DP=843339;ExcessHet=3.0155;FS=0.000;InbreedingCoeff=-0.0007;MLEAC=1,3;MLEAF=0.0002,0.000599;MQ=22.00;MQRankSum=-0.233;QD=2.11;ReadPosRankSum=0.867;SOR=0.056
chr21	8208375	2387	5'ETS	T	G,C	145383	SNV	AC=73,1;AF=0.0146,0.0002;AN=5008;BaseQRankSum=1.880;ClippingRankSum=0.000;DP=901322;ExcessHet=5.4159;FS=0.000;InbreedingCoeff=-0.0132;MLEAC=73,1;MLEAF=0.0146,0.0002;MQ=22.03;MQRankSum=-0.094;QD=2.19;ReadPosRankSum=1.401;SOR=0.059
chr21	8208377	2389	5'ETS	GGTGGCGCCCCGC	G	9205.89	INDEL	AC=8;AF=0.0016;AN=5008;BaseQRankSum=-0.177;ClippingRankSum=0.000;DP=868783;ExcessHet=3.0346;FS=0.000;InbreedingCoeff=-0.0016;MLEAC=8;MLEAF=0.0016;MQ=20.00;MQRankSum=-0.331;QD=1.79;ReadPosRankSum=1.270;SOR=0.035
chr21	8208382	2394	5'ETS	C	T,*	10891.6	SNV	AC=1,8;AF=0.0002,0.0016;AN=5008;BaseQRankSum=-3.698;ClippingRankSum=0.000;DP=871292;ExcessHet=3.0416;FS=0.000;InbreedingCoeff=-0.0017;MLEAC=1,8;MLEAF=0.0002,0.0016;MQ=7.33;MQRankSum=-2.967;QD=1.84;ReadPosRankSum=-0.364;SOR=0.038
chr21	8208383	2395	5'ETS	G	GC,T,C,*	46755.1	SNV	AC=15,1,2,8;AF=0.003,0.0002,0.000399,0.0016;AN=5008;BaseQRankSum=0.299;ClippingRankSum=0.000;DP=873809;ExcessHet=3.2936;FS=0.000;InbreedingCoeff=-0.0052;MLEAC=15,1,1,8;MLEAF=0.003,0.0002,0.0002,0.0016;MQ=18.48;MQRankSum=-0.418;QD=2.37;ReadPosRankSum=-0.180;SOR=0.045
chr21	8208389	2401	5'ETS	C	T,*	9794.57	SNV	AC=2,8;AF=0.000399,0.0016;AN=5008;BaseQRankSum=-11.780;ClippingRankSum=0.000;DP=873230;ExcessHet=3.0494;FS=0.000;InbreedingCoeff=-0.0019;MLEAC=2,8;MLEAF=0.000399,0.0016;MQ=9.83;MQRankSum=-1.903;QD=1.66;ReadPosRankSum=0.237;SOR=0.036
chr21	8208391	2403	5'ETS	T	TG	177338	SNV	AC=105;AF=0.021;AN=5008;BaseQRankSum=-2.376;ClippingRankSum=0.000;DP=975117;ExcessHet=36.4298;FS=0.000;InbreedingCoeff=-0.0403;MLEAC=106;MLEAF=0.0212;MQ=21.93;MQRankSum=-0.966;QD=2.44;ReadPosRankSum=0.118;SOR=0.057
chr21	8208396	2408	5'ETS	C	T	8532.3	SNV	AC=6;AF=0.0012;AN=5008;BaseQRankSum=-1.888;ClippingRankSum=0.000;DP=883940;ExcessHet=3.0233;FS=0.000;InbreedingCoeff=-0.0012;MLEAC=6;MLEAF=0.0012;MQ=20.30;MQRankSum=0.427;QD=1.44;ReadPosRankSum=1.340;SOR=0.063
chr21	8208401	2413	5'ETS	TGGGCTTCCCGG	T,TGGGGCTTCCCGG	12376.1	INDEL	AC=6,1;AF=0.0012,0.0002;AN=5008;BaseQRankSum=-4.219;ClippingRankSum=0.000;DP=885032;ExcessHet=3.0286;FS=0.000;InbreedingCoeff=-0.0010;MLEAC=6,1;MLEAF=0.0012,0.0002;MQ=22.25;MQRankSum=-1.367;QD=2.74;ReadPosRankSum=-0.265;SOR=0.031
chr21	8208410	2422	5'ETS	C	A,*	631483	SNV	AC=424,5;AF=0.0847,0.000998;AN=5008;BaseQRankSum=-5.793;ClippingRankSum=0.000;DP=995551;ExcessHet=92.5146;FS=0.000;InbreedingCoeff=-0.0905;MLEAC=425,5;MLEAF=0.0849,0.000998;MQ=22.12;MQRankSum=-0.997;QD=2.80;ReadPosRankSum=0.418;SOR=0.078
chr21	8208412	2424	5'ETS	G	A,*	9400.32	SNV	AC=1,5;AF=0.0002,0.000998;AN=5008;BaseQRankSum=-3.313;ClippingRankSum=0.000;DP=963012;ExcessHet=3.0233;FS=0.000;InbreedingCoeff=-0.0011;MLEAC=1,5;MLEAF=0.0002,0.000998;MQ=9.34;MQRankSum=0.232;QD=2.54;ReadPosRankSum=-0.144;SOR=0.036
chr21	8208420	2432	5'ETS	C	T	10327.4	SNV	AC=11;AF=0.0022;AN=5008;BaseQRankSum=-5.772;ClippingRankSum=0.000;DP=961717;ExcessHet=3.0893;FS=0.000;InbreedingCoeff=-0.0024;MLEAC=8;MLEAF=0.0016;MQ=22.34;MQRankSum=-2.483;QD=1.72;ReadPosRankSum=-0.214;SOR=0.049
chr21	8208422	2434	5'ETS	G	A	32259.9	SNV	AC=27;AF=0.00539;AN=5008;BaseQRankSum=-2.881;ClippingRankSum=0.000;DP=959060;ExcessHet=3.3641;FS=0.000;InbreedingCoeff=-0.0057;MLEAC=27;MLEAF=0.00539;MQ=22.34;MQRankSum=-1.481;QD=2.46;ReadPosRankSum=1.262;SOR=0.026
chr21	8208426	2438	5'ETS	T	C	14436.6	SNV	AC=9;AF=0.0018;AN=5008;BaseQRankSum=1.530;ClippingRankSum=0.000;DP=963878;ExcessHet=3.0893;FS=0.000;InbreedingCoeff=-0.0023;MLEAC=9;MLEAF=0.0018;MQ=22.45;MQRankSum=-0.881;QD=3.14;ReadPosRankSum=0.811;SOR=0.071
chr21	8208431	2443	5'ETS	C	G,T,CT,*	780448	SNV	AC=352,28,3,1;AF=0.0703,0.00559,0.000599,0.0002;AN=5008;BaseQRankSum=-2.420;ClippingRankSum=0.000;DP=969311;ExcessHet=72.5404;FS=0.000;InbreedingCoeff=-0.0806;MLEAC=352,27,3,1;MLEAF=0.0703,0.00539,0.000599,0.0002;MQ=22.48;MQRankSum=-2.279;QD=4.06;ReadPosRankSum=0.663;SOR=0.041
chr21	8208434	2446	5'ETS	C	T,*	8025.05	SNV	AC=10,1;AF=0.002,0.0002;AN=5008;BaseQRankSum=-2.146;ClippingRankSum=0.000;DP=983639;ExcessHet=3.0582;FS=0.000;InbreedingCoeff=-0.0020;MLEAC=10,1;MLEAF=0.002,0.0002;MQ=21.71;MQRankSum=-2.587;QD=1.80;ReadPosRankSum=1.036;SOR=0.030
chr21	8208435	2447	5'ETS	G	A,*	3915.77	SNV	AC=6,1;AF=0.0012,0.0002;AN=5008;BaseQRankSum=0.516;ClippingRankSum=0.000;DP=983916;ExcessHet=3.0285;FS=0.000;InbreedingCoeff=-0.0014;MLEAC=6,1;MLEAF=0.0012,0.0002;MQ=21.15;MQRankSum=-1.419;QD=1.32;ReadPosRankSum=0.606;SOR=0.035
chr21	8208437	2449	5'ETS	C	CGCGT,CGT,*	709176	INDEL	AC=390,1,1;AF=0.0779,0.0002,0.0002;AN=5008;BaseQRankSum=0.296;ClippingRankSum=0.000;DP=969770;ExcessHet=75.2546;FS=0.000;InbreedingCoeff=-0.0844;MLEAC=387,1,1;MLEAF=0.0773,0.0002,0.0002;MQ=22.59;MQRankSum=-1.991;QD=3.72;ReadPosRankSum=0.329;SOR=0.032
chr21	8208450	2462	5'ETS	G	A	660792	SNV	AC=373;AF=0.0745;AN=5008;BaseQRankSum=-8.070;ClippingRankSum=0.000;DP=967060;ExcessHet=68.4159;FS=0.000;InbreedingCoeff=-0.0807;MLEAC=373;MLEAF=0.0745;MQ=22.90;MQRankSum=-1.479;QD=3.67;ReadPosRankSum=-0.527;SOR=0.390
chr21	8208452	2464	5'ETS	A	G	231.84	SNV	AC=3;AF=0.000599;AN=5008;BaseQRankSum=1.067;ClippingRankSum=0.000;DP=976093;ExcessHet=3.0155;FS=0.000;InbreedingCoeff=-0.0007;MLEAC=2;MLEAF=0.000399;MQ=23.16;MQRankSum=5.456;QD=0.26;ReadPosRankSum=-0.692;SOR=0.018
chr21	8208455	2467	5'ETS	C	T	10933.6	SNV	AC=15;AF=0.003;AN=5008;BaseQRankSum=-0.019;ClippingRankSum=0.000;DP=976121;ExcessHet=3.1146;FS=0.000;InbreedingCoeff=-0.0031;MLEAC=15;MLEAF=0.003;MQ=22.85;MQRankSum=-3.775;QD=1.54;ReadPosRankSum=-0.277;SOR=0.016
chr21	8208459	2471	5'ETS	TC	GC,T	3815.45	SNV	AC=1,2;AF=0.0002,0.000399;AN=5008;BaseQRankSum=-1.373;ClippingRankSum=0.000;DP=976184;ExcessHet=3.0129;FS=0.000;InbreedingCoeff=-0.0006;MLEAC=1,2;MLEAF=0.0002,0.000399;MQ=23.29;MQRankSum=-1.079;QD=2.37;ReadPosRankSum=-0.324;SOR=0.026
chr21	8208460	2472	5'ETS	C	G,*	4342.52	SNV	AC=2,2;AF=0.000399,0.000399;AN=5008;BaseQRankSum=1.039;ClippingRankSum=0.000;DP=976992;ExcessHet=3.0155;FS=0.000;InbreedingCoeff=-0.0007;MLEAC=2,2;MLEAF=0.000399,0.000399;MQ=18.11;MQRankSum=6.495;QD=2.01;ReadPosRankSum=0.414;SOR=0.084
chr21	8208461	2473	5'ETS	C	CG,T	13173.4	SNV	AC=20,2;AF=0.00399,0.000399;AN=5008;BaseQRankSum=-0.039;ClippingRankSum=0.000;DP=978339;ExcessHet=3.2117;FS=0.000;InbreedingCoeff=-0.0042;MLEAC=18,2;MLEAF=0.00359,0.000399;MQ=23.07;MQRankSum=-0.745;QD=1.21;ReadPosRankSum=0.198;SOR=0.197
chr21	8208462	2474	5'ETS	G	C	8636.77	SNV	AC=3;AF=0.000599;AN=5008;BaseQRankSum=2.182;ClippingRankSum=0.000;DP=979419;ExcessHet=3.2488;FS=0.000;InbreedingCoeff=-0.0028;MLEAC=3;MLEAF=0.000599;MQ=23.18;MQRankSum=-1.603;QD=5.59;ReadPosRankSum=-0.235;SOR=1.679
chr21	8208466	2478	5'ETS	G	T,C	10909.9	SNV	AC=1,6;AF=0.0002,0.0012;AN=5008;BaseQRankSum=0.190;ClippingRankSum=0.000;DP=978886;ExcessHet=3.0286;FS=0.000;InbreedingCoeff=-0.0012;MLEAC=1,6;MLEAF=0.0002,0.0012;MQ=23.15;MQRankSum=0.789;QD=2.45;ReadPosRankSum=0.283;SOR=0.146
chr21	8208471	2483	5'ETS	G	C	3396.54	SNV	AC=9;AF=0.0018;AN=5008;BaseQRankSum=1.214;ClippingRankSum=0.000;DP=980237;ExcessHet=3.1283;FS=0.000;InbreedingCoeff=-0.0027;MLEAC=9;MLEAF=0.0018;MQ=23.30;MQRankSum=-1.310;QD=0.84;ReadPosRankSum=-1.597;SOR=0.451
chr21	8208473	2485	5'ETS	C	T,G	4162.51	SNV	AC=3,1;AF=0.000599,0.0002;AN=5008;BaseQRankSum=1.349;ClippingRankSum=0.000;DP=980715;ExcessHet=3.0155;FS=4.974;InbreedingCoeff=-0.0007;MLEAC=3,1;MLEAF=0.000599,0.0002;MQ=23.50;MQRankSum=1.324;QD=2.33;ReadPosRankSum=1.752;SOR=2.169
chr21	8208477	2489	5'ETS	ACTG	GCTG,A	16877.8	SNV	AC=23,1;AF=0.00459,0.0002;AN=5008;BaseQRankSum=1.394;ClippingRankSum=0.000;DP=995937;ExcessHet=3.2556;FS=11.987;InbreedingCoeff=-0.0016;MLEAC=23,1;MLEAF=0.00459,0.0002;MQ=23.03;MQRankSum=-5.894;QD=1.33;ReadPosRankSum=-3.421;SOR=0.165
chr21	8208479	2491	5'ETS	T	TGCG,TGCGGCG,TA	9.31082e+06	INDEL	AC=2014,2,3;AF=0.402,0.000399,0.000599;AN=5008;BaseQRankSum=-1.675;ClippingRankSum=0.000;DP=1315691;ExcessHet=2147483647.0000;FS=11.238;InbreedingCoeff=-0.6776;MLEAC=2018,2,3;MLEAF=0.403,0.000399,0.000599;MQ=23.36;MQRankSum=-0.367;QD=9.09;ReadPosRankSum=2.076;SOR=2.015
chr21	8208480	2492	5'ETS	G	T,*	16826.8	SNV	AC=4,4;AF=0.000805,0.000805;AN=4966;BaseQRankSum=-1.519;ClippingRankSum=0.000;DP=1386519;ExcessHet=3.1051;FS=6.845;InbreedingCoeff=0.0970;MLEAC=6,6;MLEAF=0.00121,0.00121;MQ=5.02;MQRankSum=-2.902;QD=5.55;ReadPosRankSum=-1.764;SOR=1.372
chr21	8208481	2493	5'ETS	C	T,CGGT	16051.1	SNV	AC=6,3;AF=0.0012,0.000599;AN=5008;BaseQRankSum=-0.941;ClippingRankSum=0.000;DP=1235665;ExcessHet=3.0286;FS=5.498;InbreedingCoeff=-0.0010;MLEAC=4,3;MLEAF=0.000799,0.000599;MQ=7.32;MQRankSum=-0.133;QD=4.57;ReadPosRankSum=-1.659;SOR=1.357
chr21	8208487	2499	5'ETS	C	T,CGGT,CGGCGGT	4284.83	INDEL	AC=1,4,1;AF=0.0002,0.000799,0.0002;AN=5008;BaseQRankSum=0.664;ClippingRankSum=0.000;DP=1228273;ExcessHet=3.0234;FS=4.453;InbreedingCoeff=-0.0002;MLEAC=1,4,1;MLEAF=0.0002,0.000799,0.0002;MQ=23.19;MQRankSum=1.805;QD=1.52;ReadPosRankSum=2.400;SOR=1.262
chr21	8208493	2505	5'ETS	T	TA,A,TG	621995	SNV	AC=326,1,1;AF=0.0651,0.0002,0.0002;AN=5008;BaseQRankSum=-2.337;ClippingRankSum=0.000;DP=1252635;ExcessHet=53.6788;FS=8.285;InbreedingCoeff=-0.0643;MLEAC=325,1,1;MLEAF=0.0649,0.0002,0.0002;MQ=23.34;MQRankSum=-0.834;QD=2.93;ReadPosRankSum=-1.973;SOR=0.244
chr21	8208494	2506	5'ETS	G	C	2812.74	SNV	AC=4;AF=0.000799;AN=5008;BaseQRankSum=-0.663;ClippingRankSum=0.000;DP=1255987;ExcessHet=33.6004;FS=16.119;InbreedingCoeff=-0.0286;MLEAC=4;MLEAF=0.000799;MQ=19.28;MQRankSum=-3.565;QD=2.16;ReadPosRankSum=-2.155;SOR=0.165
chr21	8208505	2517	5'ETS	C	T	4078.81	SNV	AC=7;AF=0.0014;AN=5008;BaseQRankSum=0.334;ClippingRankSum=0.000;DP=1220695;ExcessHet=3.0346;FS=21.344;InbreedingCoeff=-0.0015;MLEAC=7;MLEAF=0.0014;MQ=20.98;MQRankSum=6.026;QD=0.97;ReadPosRankSum=7.101;SOR=2.510
chr21	8208507	2519	5'ETS	G	C	16426.9	SNV	AC=18;AF=0.00359;AN=5008;BaseQRankSum=-0.710;ClippingRankSum=0.000;DP=1226925;ExcessHet=3.2502;FS=0.000;InbreedingCoeff=-0.0041;MLEAC=17;MLEAF=0.00339;MQ=22.65;MQRankSum=0.254;QD=0.97;ReadPosRankSum=-0.328;SOR=0.665
chr21	8208522	2534	5'ETS	C	A	5658.17	SNV	AC=5;AF=0.000998;AN=5008;BaseQRankSum=0.320;ClippingRankSum=0.000;DP=1220933;ExcessHet=3.0285;FS=7.580;InbreedingCoeff=-0.0012;MLEAC=4;MLEAF=0.000799;MQ=21.01;MQRankSum=-0.395;QD=1.44;ReadPosRankSum=-0.988;SOR=0.803
chr21	8208525	2537	5'ETS	TCGGCCGCCC	T	11943.5	INDEL	AC=3;AF=0.000599;AN=5008;BaseQRankSum=0.830;ClippingRankSum=0.000;DP=1221817;ExcessHet=3.0129;FS=0.650;InbreedingCoeff=-0.0006;MLEAC=3;MLEAF=0.000599;MQ=19.39;MQRankSum=0.201;QD=5.54;ReadPosRankSum=1.869;SOR=0.649
chr21	8208530	2542	5'ETS	C	T,*	13872.5	SNV	AC=1,3;AF=0.0002,0.000599;AN=5008;BaseQRankSum=-4.033;ClippingRankSum=0.000;DP=1221125;ExcessHet=3.0155;FS=2.204;InbreedingCoeff=-0.0008;MLEAC=1,3;MLEAF=0.0002,0.000599;MQ=9.77;MQRankSum=-1.500;QD=5.17;ReadPosRankSum=-0.698;SOR=0.959
chr21	8208534	2546	5'ETS	C	A,*	13166.5	SNV	AC=2,3;AF=0.000399,0.000599;AN=5008;BaseQRankSum=0.062;ClippingRankSum=0.000;DP=1221727;ExcessHet=3.0190;FS=1.474;InbreedingCoeff=-0.0010;MLEAC=2,3;MLEAF=0.000399,0.000599;MQ=14.32;MQRankSum=1.270;QD=3.65;ReadPosRankSum=0.764;SOR=0.847
chr21	8208535	2547	5'ETS	C	G	49562.6	SNV	AC=25;AF=0.00499;AN=5008;BaseQRankSum=0.145;ClippingRankSum=0.000;DP=1242148;ExcessHet=3.6880;FS=1.512;InbreedingCoeff=-0.0066;MLEAC=25;MLEAF=0.00499;MQ=23.01;MQRankSum=-0.597;QD=1.89;ReadPosRankSum=-0.428;SOR=0.938
chr21	8208536	2548	5'ETS	GGGTGCCGCGC	G	143995	INDEL	AC=36;AF=0.00719;AN=5008;BaseQRankSum=0.889;ClippingRankSum=0.000;DP=1244930;ExcessHet=3.5605;FS=0.735;InbreedingCoeff=-0.0072;MLEAC=35;MLEAF=0.00699;MQ=23.04;MQRankSum=1.347;QD=3.72;ReadPosRankSum=1.221;SOR=0.823
chr21	8208537	2549	5'ETS	G	C,*	146976	SNV	AC=2,36;AF=0.000399,0.00719;AN=5008;BaseQRankSum=-1.248;ClippingRankSum=0.000;DP=1245786;ExcessHet=3.6245;FS=0.735;InbreedingCoeff=-0.0076;MLEAC=2,35;MLEAF=0.000399,0.00699;MQ=5.18;MQRankSum=0.585;QD=3.60;ReadPosRankSum=-0.809;SOR=0.834
chr21	8208538	2550	5'ETS	G	T,*	148641	SNV	AC=3,36;AF=0.000599,0.00719;AN=5008;BaseQRankSum=-4.984;ClippingRankSum=0.000;DP=1248938;ExcessHet=3.6579;FS=0.753;InbreedingCoeff=-0.0078;MLEAC=3,35;MLEAF=0.000599,0.00699;MQ=7.64;MQRankSum=0.012;QD=3.41;ReadPosRankSum=0.055;SOR=0.841
chr21	8208541	2553	5'ETS	C	T,*	145287	SNV	AC=1,35;AF=0.0002,0.00699;AN=5008;BaseQRankSum=-2.565;ClippingRankSum=0.000;DP=1248721;ExcessHet=3.5605;FS=0.735;InbreedingCoeff=-0.0072;MLEAC=1,35;MLEAF=0.0002,0.00699;MQ=5.07;MQRankSum=0.601;QD=3.77;ReadPosRankSum=0.766;SOR=0.807
chr21	8208544	2556	5'ETS	C	T,*	146496	SNV	AC=1,36;AF=0.0002,0.00719;AN=5008;BaseQRankSum=-0.390;ClippingRankSum=0.000;DP=1248794;ExcessHet=3.5926;FS=0.731;InbreedingCoeff=-0.0073;MLEAC=1,35;MLEAF=0.0002,0.00699;MQ=4.09;MQRankSum=2.226;QD=3.66;ReadPosRankSum=-0.354;SOR=0.813
chr21	8208549	2561	5'ETS	TGCC	T	61607.7	INDEL	AC=12;AF=0.0024;AN=5008;BaseQRankSum=-1.416;ClippingRankSum=0.000;DP=1250677;ExcessHet=3.0677;FS=5.440;InbreedingCoeff=-0.0024;MLEAC=12;MLEAF=0.0024;MQ=22.82;MQRankSum=0.812;QD=4.85;ReadPosRankSum=-0.016;SOR=0.888
chr21	8208552	2564	5'ETS	C	T,*	65056.8	SNV	AC=1,12;AF=0.0002,0.0024;AN=5008;BaseQRankSum=-1.937;ClippingRankSum=0.000;DP=1250877;ExcessHet=3.0781;FS=5.429;InbreedingCoeff=-0.0026;MLEAC=1,12;MLEAF=0.0002,0.0024;MQ=8.69;MQRankSum=3.881;QD=4.38;ReadPosRankSum=-0.089;SOR=0.856
chr21	8208557	2569	5'ETS	G	A	227247	SNV	AC=62;AF=0.0124;AN=5008;BaseQRankSum=-5.928;ClippingRankSum=0.000;DP=1316147;ExcessHet=5.5056;FS=0.000;InbreedingCoeff=-0.0140;MLEAC=62;MLEAF=0.0124;MQ=22.97;MQRankSum=0.759;QD=2.50;ReadPosRankSum=-0.329;SOR=0.713
chr21	8208559	2571	5'ETS	G	A	4389.45	SNV	AC=3;AF=0.000599;AN=5008;BaseQRankSum=0.934;ClippingRankSum=0.000;DP=1259685;ExcessHet=3.0129;FS=2.661;InbreedingCoeff=-0.0006;MLEAC=3;MLEAF=0.000599;MQ=22.96;MQRankSum=0.554;QD=0.72;ReadPosRankSum=-0.060;SOR=1.062
chr21	8208564	2576	5'ETS	T	C	3026.45	SNV	AC=3;AF=0.000599;AN=5008;BaseQRankSum=0.611;ClippingRankSum=0.000;DP=1258297;ExcessHet=3.0129;FS=23.620;InbreedingCoeff=-0.0006;MLEAC=3;MLEAF=0.000599;MQ=22.72;MQRankSum=0.101;QD=0.97;ReadPosRankSum=1.918;SOR=1.938
chr21	8208576	2588	5'ETS	C	T	5384.53	SNV	AC=4;AF=0.000799;AN=5008;BaseQRankSum=-0.379;ClippingRankSum=0.000;DP=1266092;ExcessHet=3.0233;FS=12.839;InbreedingCoeff=-0.0010;MLEAC=4;MLEAF=0.000799;MQ=22.79;MQRankSum=2.378;QD=0.69;ReadPosRankSum=3.519;SOR=2.056
chr21	8208577	2589	5'ETS	G	A	4666.53	SNV	AC=4;AF=0.000799;AN=5008;BaseQRankSum=-0.397;ClippingRankSum=0.000;DP=1271303;ExcessHet=3.0233;FS=0.791;InbreedingCoeff=-0.0010;MLEAC=4;MLEAF=0.000799;MQ=22.89;MQRankSum=2.279;QD=0.58;ReadPosRankSum=3.212;SOR=0.630
chr21	8208587	2599	5'ETS	G	A,T,*	3135.52	SNV	AC=1,2,1;AF=0.0002,0.000399,0.0002;AN=5008;BaseQRankSum=-3.490;ClippingRankSum=0.000;DP=1268259;ExcessHet=3.0155;FS=6.229;InbreedingCoeff=-0.0006;MLEAC=1,2,1;MLEAF=0.0002,0.000399,0.0002;MQ=18.99;MQRankSum=-6.820;QD=0.53;ReadPosRankSum=-1.456;SOR=0.520
chr21	8208589	2601	5'ETS	T	C,*	4.75832e+06	SNV	AC=1211,1;AF=0.242,0.0002;AN=5008;BaseQRankSum=3.468;ClippingRankSum=0.000;DP=2537928;ExcessHet=1014.1218;FS=134.980;InbreedingCoeff=-0.3199;MLEAC=1236,1;MLEAF=0.247,0.0002;MQ=22.73;MQRankSum=-10.484;QD=2.84;ReadPosRankSum=-2.641;SOR=7.267
chr21	8252798	2601	5'ETS	G	A	439.85	SNV	AC=12;AF=0.0024;AN=4994;BaseQRankSum=0.000;ClippingRankSum=-0.000;DP=38158;ExcessHet=0.1112;FS=4.548;InbreedingCoeff=0.0230;MLEAC=10;MLEAF=0.002;MQ=21.77;MQRankSum=-0.361;QD=3.05;ReadPosRankSum=0.524;SOR=1.451
chr21	8208591	2603	5'ETS	C	T,*	8938.54	SNV	AC=3,1;AF=0.000599,0.0002;AN=5008;BaseQRankSum=-1.829;ClippingRankSum=0.000;DP=814953;ExcessHet=3.0155;FS=6.217;InbreedingCoeff=-0.0007;MLEAC=3,1;MLEAF=0.000599,0.0002;MQ=19.18;MQRankSum=-0.795;QD=1.36;ReadPosRankSum=1.017;SOR=1.302
chr21	8208592	2604	5'ETS	G	C,A,*	40714.1	SNV	AC=3,8,1;AF=0.000599,0.0016,0.0002;AN=5008;BaseQRankSum=-0.910;ClippingRankSum=0.000;DP=812948;ExcessHet=3.0678;FS=5.523;InbreedingCoeff=-0.0017;MLEAC=3,8,1;MLEAF=0.000599,0.0016,0.0002;MQ=21.64;MQRankSum=1.663;QD=2.37;ReadPosRankSum=0.477;SOR=1.220
chr21	8208601	2613	5'ETS	C	T	7552.92	SNV	AC=7;AF=0.0014;AN=5008;BaseQRankSum=-4.791;ClippingRankSum=0.000;DP=794501;ExcessHet=3.1429;FS=62.181;InbreedingCoeff=-0.0025;MLEAC=7;MLEAF=0.0014;MQ=22.61;MQRankSum=-4.960;QD=1.15;ReadPosRankSum=-1.039;SOR=6.291
chr21	8252812	2615	5'ETS	G	C	297.61	SNV	AC=13;AF=0.00261;AN=4990;BaseQRankSum=-0.000;ClippingRankSum=0.000;DP=38285;ExcessHet=3.2314;FS=0.000;InbreedingCoeff=-0.0103;MLEAC=9;MLEAF=0.0018;MQ=21.55;MQRankSum=0.083;QD=1.52;ReadPosRankSum=0.000;SOR=0.781
chr21	8208606	2618	5'ETS	G	C	57998.5	SNV	AC=17;AF=0.00339;AN=5008;BaseQRankSum=2.681;ClippingRankSum=0.000;DP=773416;ExcessHet=3.1286;FS=6.950;InbreedingCoeff=-0.0034;MLEAC=17;MLEAF=0.00339;MQ=22.63;MQRankSum=2.672;QD=2.16;ReadPosRankSum=0.359;SOR=1.284
chr21	8252822	2625	5'ETS	C	T	71.16	SNV	AC=7;AF=0.0014;AN=4992;BaseQRankSum=0.617;ClippingRankSum=0.000;DP=37843;ExcessHet=3.1762;FS=0.000;InbreedingCoeff=-0.0095;MLEAC=3;MLEAF=0.000601;MQ=21.39;MQRankSum=-0.709;QD=0.67;ReadPosRankSum=0.000;SOR=0.706
chr21	8252824	2627	5'ETS	T	C	3138.85	SNV	AC=101;AF=0.0203;AN=4982;BaseQRankSum=0.385;ClippingRankSum=0.000;DP=37146;ExcessHet=27.2382;FS=1.412;InbreedingCoeff=-0.0536;MLEAC=89;MLEAF=0.0179;MQ=21.69;MQRankSum=-0.090;QD=1.63;ReadPosRankSum=-0.000;SOR=0.503
chr21	8208616	2628	5'ETS	C	T	14223.9	SNV	AC=7;AF=0.0014;AN=5008;BaseQRankSum=-4.620;ClippingRankSum=0.000;DP=749242;ExcessHet=3.0494;FS=2.602;InbreedingCoeff=-0.0017;MLEAC=7;MLEAF=0.0014;MQ=22.79;MQRankSum=0.473;QD=1.27;ReadPosRankSum=0.435;SOR=0.980
chr21	8252826	2629	5'ETS	G	A	63.48	SNV	AC=3;AF=0.000601;AN=4992;BaseQRankSum=-0.000;ClippingRankSum=-0.000;DP=38573;ExcessHet=3.1021;FS=2.657;InbreedingCoeff=-0.0082;MLEAC=2;MLEAF=0.000401;MQ=21.55;MQRankSum=-0.210;QD=1.67;ReadPosRankSum=-0.000;SOR=1.545
chr21	8208618	2630	5'ETS	T	C	406655	SNV	AC=139;AF=0.0278;AN=5008;BaseQRankSum=-1.953;ClippingRankSum=0.000;DP=875107;ExcessHet=18.6980;FS=4.724;InbreedingCoeff=-0.0339;MLEAC=139;MLEAF=0.0278;MQ=22.70;MQRankSum=3.695;QD=1.80;ReadPosRankSum=0.938;SOR=0.374
chr21	8208620	2632	5'ETS	G	A	3812.47	SNV	AC=3;AF=0.000599;AN=5008;BaseQRankSum=-3.770;ClippingRankSum=0.000;DP=640271;ExcessHet=3.0155;FS=6.434;InbreedingCoeff=-0.0007;MLEAC=3;MLEAF=0.000599;MQ=22.55;MQRankSum=1.461;QD=0.95;ReadPosRankSum=0.049;SOR=1.363
chr21	8252829	2632	5'ETS	T	TC	332.65	SNV	AC=7;AF=0.0014;AN=4988;BaseQRankSum=0.000;ClippingRankSum=-0.000;DP=38648;ExcessHet=3.8402;FS=4.207;InbreedingCoeff=-0.0161;MLEAC=6;MLEAF=0.0012;MQ=21.36;MQRankSum=0.114;QD=2.11;ReadPosRankSum=-0.000;SOR=0.148
chr21	8208623	2635	5'ETS	T	TC	13866.4	SNV	AC=9;AF=0.0018;AN=5008;BaseQRankSum=0.567;ClippingRankSum=0.000;DP=629556;ExcessHet=3.0416;FS=9.116;InbreedingCoeff=-0.0018;MLEAC=9;MLEAF=0.0018;MQ=22.59;MQRankSum=0.947;QD=1.41;ReadPosRankSum=0.159;SOR=1.594
chr21	8252832	2635	5'ETS	C	G	49.44	SNV	AC=3;AF=0.000601;AN=4992;BaseQRankSum=0.000;ClippingRankSum=-0.000;DP=38786;ExcessHet=3.2937;FS=0.000;InbreedingCoeff=-0.0087;MLEAC=2;MLEAF=0.000401;MQ=20.93;MQRankSum=-0.259;QD=0.85;ReadPosRankSum=-0.000;SOR=0.397
chr21	8252834	2637	5'ETS	T	G	116.95	SNV	AC=8;AF=0.00161;AN=4978;BaseQRankSum=-2.063;ClippingRankSum=0.000;DP=38701;ExcessHet=10.5806;FS=4.317;InbreedingCoeff=-0.0388;MLEAC=4;MLEAF=0.000804;MQ=21.63;MQRankSum=-0.250;QD=1.08;ReadPosRankSum=0.000;SOR=1.952
chr21	8208626	2638	5'ETS	C	G	17348.5	SNV	AC=3;AF=0.000599;AN=5008;BaseQRankSum=-0.905;ClippingRankSum=0.000;DP=623316;ExcessHet=3.0129;FS=0.000;InbreedingCoeff=-0.0006;MLEAC=3;MLEAF=0.000599;MQ=22.64;MQRankSum=1.627;QD=2.91;ReadPosRankSum=0.028;SOR=0.729
chr21	8208632	2644	5'ETS	C	G	17906.3	SNV	AC=6;AF=0.0012;AN=5008;BaseQRankSum=-1.022;ClippingRankSum=0.000;DP=618633;ExcessHet=3.0233;FS=5.770;InbreedingCoeff=-0.0012;MLEAC=6;MLEAF=0.0012;MQ=22.75;MQRankSum=-0.225;QD=2.18;ReadPosRankSum=-0.054;SOR=1.271
chr21	8208633	2645	5'ETS	C	T	2493.45	SNV	AC=3;AF=0.000599;AN=5008;BaseQRankSum=-0.438;ClippingRankSum=0.000;DP=611314;ExcessHet=3.0129;FS=6.450;InbreedingCoeff=-0.0006;MLEAC=3;MLEAF=0.000599;MQ=22.66;MQRankSum=1.330;QD=0.90;ReadPosRankSum=-1.926;SOR=1.352
chr21	8252851	2654	5'ETS	T	C	111.24	SNV	AC=5;AF=0.001;AN=4990;BaseQRankSum=-0.524;ClippingRankSum=0.000;DP=38856;ExcessHet=3.4447;FS=3.630;InbreedingCoeff=-0.0117;MLEAC=4;MLEAF=0.000802;MQ=21.74;MQRankSum=0.524;QD=1.32;ReadPosRankSum=0.000;SOR=0.229
chr21	8252853	2656	5'ETS	C	T	81.6	SNV	AC=3;AF=0.000601;AN=4992;BaseQRankSum=0.524;ClippingRankSum=-0.000;DP=38800;ExcessHet=3.2121;FS=0.000;InbreedingCoeff=-0.0091;MLEAC=2;MLEAF=0.000401;MQ=21.35;MQRankSum=-0.000;QD=2.21;ReadPosRankSum=-0.000;SOR=0.223
chr21	8208645	2657	5'ETS	T	C	18663.3	SNV	AC=6;AF=0.0012;AN=5008;BaseQRankSum=1.972;ClippingRankSum=0.000;DP=600309;ExcessHet=3.0233;FS=5.420;InbreedingCoeff=-0.0012;MLEAC=6;MLEAF=0.0012;MQ=22.57;MQRankSum=4.135;QD=2.20;ReadPosRankSum=0.064;SOR=1.135
chr21	8252855	2658	5'ETS	C	T	968.19	SNV	AC=35;AF=0.00701;AN=4992;BaseQRankSum=-0.878;ClippingRankSum=-0.000;DP=38513;ExcessHet=6.5197;FS=0.000;InbreedingCoeff=-0.0221;MLEAC=27;MLEAF=0.00541;MQ=21.66;MQRankSum=-0.203;QD=1.41;ReadPosRankSum=0.000;SOR=0.666
chr21	8208647	2659	5'ETS	C	T	12361.5	SNV	AC=5;AF=0.000998;AN=5008;BaseQRankSum=-2.882;ClippingRankSum=0.000;DP=599300;ExcessHet=3.0285;FS=0.000;InbreedingCoeff=-0.0012;MLEAC=5;MLEAF=0.000998;MQ=22.54;MQRankSum=1.429;QD=2.00;ReadPosRankSum=-0.329;SOR=0.788
chr21	8252857	2660	5'ETS	C	T	139.41	SNV	AC=4;AF=0.000802;AN=4990;BaseQRankSum=0.298;ClippingRankSum=0.000;DP=37988;ExcessHet=3.0417;FS=0.000;InbreedingCoeff=-0.0063;MLEAC=3;MLEAF=0.000601;MQ=21.46;MQRankSum=0.526;QD=2.21;ReadPosRankSum=0.000;SOR=0.892
chr21	8208649	2661	5'ETS	C	T,G	66923	SNV	AC=42,1;AF=0.00839,0.0002;AN=5008;BaseQRankSum=-1.267;ClippingRankSum=0.000;DP=615365;ExcessHet=3.8052;FS=34.890;InbreedingCoeff=-0.0077;MLEAC=42,1;MLEAF=0.00839,0.0002;MQ=22.51;MQRankSum=-6.596;QD=1.29;ReadPosRankSum=-1.404;SOR=4.261
chr21	8252861	2664	5'ETS	T	C	3252.86	SNV	AC=69;AF=0.0138;AN=4992;BaseQRankSum=0.747;ClippingRankSum=0.000;DP=38623;ExcessHet=9.8138;FS=0.000;InbreedingCoeff=-0.0342;MLEAC=59;MLEAF=0.0118;MQ=21.69;MQRankSum=0.000;QD=2.12;ReadPosRankSum=0.000;SOR=0.596
chr21	8208655	2667	5'ETS	T	C	178009	SNV	AC=71;AF=0.0142;AN=5008;BaseQRankSum=2.960;ClippingRankSum=0.000;DP=570284;ExcessHet=6.6769;FS=3.570;InbreedingCoeff=-0.0165;MLEAC=71;MLEAF=0.0142;MQ=22.58;MQRankSum=-0.220;QD=2.11;ReadPosRankSum=-0.603;SOR=1.028
chr21	8252866	2669	5'ETS	C	G	152.93	SNV	AC=6;AF=0.0012;AN=4994;BaseQRankSum=0.500;ClippingRankSum=0.000;DP=38173;ExcessHet=3.1436;FS=0.000;InbreedingCoeff=-0.0091;MLEAC=4;MLEAF=0.000801;MQ=21.75;MQRankSum=0.277;QD=1.01;ReadPosRankSum=0.000;SOR=0.752
chr21	8208660	2672	5'ETS	C	G	9548.52	SNV	AC=5;AF=0.000998;AN=5008;BaseQRankSum=2.246;ClippingRankSum=0.000;DP=468013;ExcessHet=3.0233;FS=30.763;InbreedingCoeff=-0.0011;MLEAC=5;MLEAF=0.000998;MQ=22.53;MQRankSum=-7.336;QD=1.61;ReadPosRankSum=-1.148;SOR=4.031
chr21	8391709	2674	5'ETS	G	GT	160.49	SNV	AC=4;AF=0.25;AN=16;DP=65;ExcessHet=0.0458;FS=0.000;MLEAC=3;MLEAF=0.188;MQ=4.96;QD=80.25;SOR=1.179
chr21	8252881	2684	5'ETS	G	A	33.77	SNV	AC=5;AF=0.001;AN=4990;BaseQRankSum=0.000;ClippingRankSum=0.000;DP=38466;ExcessHet=3.0417;FS=0.000;InbreedingCoeff=-0.0057;MLEAC=2;MLEAF=0.000401;MQ=21.50;MQRankSum=0.396;QD=0.32;ReadPosRankSum=0.000;SOR=0.339
chr21	8208673	2685	5'ETS	T	C	6060.47	SNV	AC=3;AF=0.000599;AN=5008;BaseQRankSum=2.107;ClippingRankSum=0.000;DP=457476;ExcessHet=3.0155;FS=1.553;InbreedingCoeff=-0.0007;MLEAC=3;MLEAF=0.000599;MQ=22.65;MQRankSum=1.277;QD=2.53;ReadPosRankSum=0.277;SOR=0.523
chr21	8252888	2691	5'ETS	G	T	535.34	SNV	AC=23;AF=0.00461;AN=4990;BaseQRankSum=-0.000;ClippingRankSum=0.000;DP=38653;ExcessHet=3.4721;FS=0.918;InbreedingCoeff=-0.0120;MLEAC=18;MLEAF=0.00361;MQ=21.57;MQRankSum=-0.126;QD=1.47;ReadPosRankSum=0.000;SOR=0.801
chr21	8208682	2694	5'ETS	G	T	32016.2	SNV	AC=22;AF=0.00439;AN=5008;BaseQRankSum=-2.518;ClippingRankSum=0.000;DP=450509;ExcessHet=3.2506;FS=3.360;InbreedingCoeff=-0.0046;MLEAC=22;MLEAF=0.00439;MQ=22.60;MQRankSum=1.226;QD=1.90;ReadPosRankSum=0.155;SOR=1.107
chr21	8208683	2695	5'ETS	T	C	3123.45	SNV	AC=3;AF=0.000599;AN=5008;BaseQRankSum=0.175;ClippingRankSum=0.000;DP=436271;ExcessHet=3.0129;FS=0.000;InbreedingCoeff=-0.0006;MLEAC=3;MLEAF=0.000599;MQ=22.72;MQRankSum=1.333;QD=1.55;ReadPosRankSum=0.219;SOR=0.732
chr21	8252894	2697	5'ETS	C	T	125.06	SNV	AC=9;AF=0.0018;AN=4988;BaseQRankSum=-0.000;ClippingRankSum=-0.000;DP=38263;ExcessHet=3.3161;FS=1.866;InbreedingCoeff=-0.0093;MLEAC=4;MLEAF=0.000802;MQ=21.62;MQRankSum=-0.210;QD=0.84;ReadPosRankSum=0.000;SOR=0.283
chr21	8208688	2700	5'ETS	C	T	12158.4	SNV	AC=10;AF=0.002;AN=5008;BaseQRankSum=-1.976;ClippingRankSum=0.000;DP=434943;ExcessHet=3.0494;FS=0.000;InbreedingCoeff=-0.0020;MLEAC=10;MLEAF=0.002;MQ=22.62;MQRankSum=0.549;QD=1.60;ReadPosRankSum=0.304;SOR=0.752
chr21	8252897	2700	5'ETS	C	T	59.76	SNV	AC=5;AF=0.001;AN=4992;BaseQRankSum=0.000;ClippingRankSum=-0.000;DP=38641;ExcessHet=3.0495;FS=2.259;InbreedingCoeff=-0.0069;MLEAC=2;MLEAF=0.000401;MQ=21.98;MQRankSum=0.301;QD=0.83;ReadPosRankSum=-0.000;SOR=1.574
chr21	8208691	2703	5'ETS	C	T	9051.3	SNV	AC=6;AF=0.0012;AN=5008;BaseQRankSum=-3.755;ClippingRankSum=0.000;DP=428004;ExcessHet=3.0233;FS=2.197;InbreedingCoeff=-0.0012;MLEAC=6;MLEAF=0.0012;MQ=22.61;MQRankSum=2.014;QD=2.45;ReadPosRankSum=-0.756;SOR=0.862
chr21	8252902	2705	5'ETS	C	T	318.89	SNV	AC=9;AF=0.0018;AN=4992;BaseQRankSum=0.000;ClippingRankSum=0.000;DP=38609;ExcessHet=3.1288;FS=2.910;InbreedingCoeff=-0.0090;MLEAC=8;MLEAF=0.0016;MQ=21.75;MQRankSum=-0.000;QD=2.29;ReadPosRankSum=0.241;SOR=1.155
chr21	8208696	2708	5'ETS	C	T	12191.9	SNV	AC=11;AF=0.0022;AN=5008;BaseQRankSum=-0.381;ClippingRankSum=0.000;DP=424619;ExcessHet=3.0781;FS=2.275;InbreedingCoeff=-0.0024;MLEAC=11;MLEAF=0.0022;MQ=22.66;MQRankSum=1.638;QD=2.11;ReadPosRankSum=-0.221;SOR=0.953
chr21	8252909	2712	5'ETS	C	T	88.37	SNV	AC=6;AF=0.0012;AN=4986;BaseQRankSum=-0.000;ClippingRankSum=-0.000;DP=38485;ExcessHet=3.1018;FS=15.100;InbreedingCoeff=-0.0093;MLEAC=4;MLEAF=0.000802;MQ=22.00;MQRankSum=0.210;QD=0.91;ReadPosRankSum=0.299;SOR=0.016
chr21	8208703	2715	5'ETS	C	T	2654.5	SNV	AC=5;AF=0.000998;AN=5008;BaseQRankSum=-0.992;ClippingRankSum=0.000;DP=417949;ExcessHet=3.0190;FS=6.223;InbreedingCoeff=-0.0010;MLEAC=5;MLEAF=0.000998;MQ=22.50;MQRankSum=3.161;QD=1.23;ReadPosRankSum=0.900;SOR=0.728
chr21	8252915	2718	5'ETS	T	C	292.06	SNV	AC=9;AF=0.00182;AN=4954;BaseQRankSum=0.560;ClippingRankSum=0.000;DP=38667;ExcessHet=3.5051;FS=3.328;InbreedingCoeff=-0.0285;MLEAC=4;MLEAF=0.000807;MQ=21.25;MQRankSum=-0.086;QD=1.29;ReadPosRankSum=0.080;SOR=0.268
chr21	8252917	2720	5'ETS	C	T	44.01	SNV	AC=4;AF=0.000864;AN=4632;BaseQRankSum=0.724;ClippingRankSum=0.000;DP=33850;ExcessHet=3.3159;FS=9.320;InbreedingCoeff=-0.0757;MLEAC=3;MLEAF=0.000648;MQ=16.76;MQRankSum=-0.135;QD=0.48;ReadPosRankSum=0.213;SOR=2.863
chr21	8208709	2721	5'ETS	T	C	5413.55	SNV	AC=8;AF=0.0016;AN=5008;BaseQRankSum=1.334;ClippingRankSum=0.000;DP=415192;ExcessHet=3.0780;FS=0.000;InbreedingCoeff=-0.0021;MLEAC=8;MLEAF=0.0016;MQ=22.61;MQRankSum=1.130;QD=1.99;ReadPosRankSum=0.834;SOR=0.695
chr21	8252927	2730	5'ETS	C	T	66.65	SNV	AC=3;AF=0.00188;AN=1596;BaseQRankSum=0.524;ClippingRankSum=-0.000;DP=4359;ExcessHet=4.6745;FS=15.418;InbreedingCoeff=-0.2135;MLEAC=7;MLEAF=0.00439;MQ=6.73;MQRankSum=0.967;QD=2.47;ReadPosRankSum=1.111;SOR=0.008
chr21	8208720	2732	5'ETS	T	C	1191.51	SNV	AC=4;AF=0.000799;AN=5008;BaseQRankSum=1.247;ClippingRankSum=0.000;DP=281240;ExcessHet=3.0233;FS=0.000;InbreedingCoeff=-0.0011;MLEAC=4;MLEAF=0.000799;MQ=22.42;MQRankSum=1.350;QD=1.75;ReadPosRankSum=0.578;SOR=0.766
chr21	8208721	2733	5'ETS	C	T	4523.74	SNV	AC=29;AF=0.00579;AN=5008;BaseQRankSum=0.849;ClippingRankSum=0.000;DP=231277;ExcessHet=3.5286;FS=34.773;InbreedingCoeff=-0.0064;MLEAC=25;MLEAF=0.00499;MQ=22.42;MQRankSum=-1.865;QD=1.13;ReadPosRankSum=0.640;SOR=5.147
chr21	8208737	2749	5'ETS	T	G	368.18	SNV	AC=10;AF=0.00201;AN=4986;BaseQRankSum=0.533;ClippingRankSum=0.000;DP=47686;ExcessHet=3.2116;FS=2.159;InbreedingCoeff=-0.0194;MLEAC=8;MLEAF=0.0016;MQ=22.55;MQRankSum=0.000;QD=1.74;ReadPosRankSum=0.000;SOR=1.444
chr21	8208739	2751	5'ETS	C	A	780.63	SNV	AC=20;AF=0.00406;AN=4928;BaseQRankSum=0.490;ClippingRankSum=0.000;DP=41162;ExcessHet=3.6639;FS=2.699;InbreedingCoeff=-0.0404;MLEAC=18;MLEAF=0.00365;MQ=22.33;MQRankSum=0.000;QD=2.12;ReadPosRankSum=0.549;SOR=1.208
chr21	8208797	2809	5'ETS	C	T	103.4	SNV	AC=7;AF=0.00142;AN=4922;BaseQRankSum=1.833;ClippingRankSum=-0.000;DP=28752;ExcessHet=3.9646;FS=35.067;InbreedingCoeff=-0.0143;MLEAC=6;MLEAF=0.00122;MQ=23.00;MQRankSum=0.921;QD=1.25;ReadPosRankSum=1.150;SOR=0.206
chr21	8208807	2819	5'ETS	A	G	8062.07	SNV	AC=25;AF=0.00499;AN=5008;BaseQRankSum=0.446;ClippingRankSum=0.000;DP=112781;ExcessHet=3.3890;FS=0.000;InbreedingCoeff=-0.0056;MLEAC=24;MLEAF=0.00479;MQ=23.34;MQRankSum=2.476;QD=1.96;ReadPosRankSum=0.026;SOR=0.726
chr21	8208814	2826	5'ETS	C	T	356.95	SNV	AC=4;AF=0.000799;AN=5008;BaseQRankSum=0.176;ClippingRankSum=0.000;DP=110666;ExcessHet=3.0190;FS=0.000;InbreedingCoeff=-0.0009;MLEAC=2;MLEAF=0.000399;MQ=23.29;MQRankSum=-3.791;QD=0.38;ReadPosRankSum=0.210;SOR=0.106
chr21	8208831	2843	5'ETS	G	C,A,GC	1186.59	SNV	AC=1,1,1;AF=0.0002,0.0002,0.0002;AN=5008;BaseQRankSum=-1.991;ClippingRankSum=0.000;DP=111038;ExcessHet=3.0129;FS=0.000;InbreedingCoeff=-0.0006;MLEAC=1,1,1;MLEAF=0.0002,0.0002,0.0002;MQ=23.21;MQRankSum=-0.798;QD=1.02;ReadPosRankSum=-0.001;SOR=0.594
chr21	8208836	2848	5'ETS	G	A	749.05	SNV	AC=4;AF=0.000799;AN=5008;BaseQRankSum=-1.873;ClippingRankSum=0.000;DP=113368;ExcessHet=3.0415;FS=0.000;InbreedingCoeff=-0.0013;MLEAC=4;MLEAF=0.000799;MQ=23.44;MQRankSum=-5.831;QD=0.44;ReadPosRankSum=0.229;SOR=1.571
chr21	8208839	2851	5'ETS	C	T	3921.58	SNV	AC=5;AF=0.000998;AN=5008;BaseQRankSum=-1.529;ClippingRankSum=0.000;DP=118003;ExcessHet=3.0415;FS=0.000;InbreedingCoeff=-0.0014;MLEAC=5;MLEAF=0.000998;MQ=23.48;MQRankSum=1.040;QD=1.51;ReadPosRankSum=0.284;SOR=1.462
chr21	8208842	2854	5'ETS	C	T	4497.45	SNV	AC=3;AF=0.000599;AN=5008;BaseQRankSum=0.250;ClippingRankSum=0.000;DP=113422;ExcessHet=3.0129;FS=0.000;InbreedingCoeff=-0.0006;MLEAC=3;MLEAF=0.000599;MQ=23.56;MQRankSum=3.511;QD=2.89;ReadPosRankSum=1.086;SOR=0.267
chr21	8208891	2903	5'ETS	TCGTGCGA	CCGTGCGA,T	5823.97	SNV	AC=4,3;AF=0.000799,0.000599;AN=5008;BaseQRankSum=0.770;ClippingRankSum=0.000;DP=120668;ExcessHet=3.0286;FS=0.000;InbreedingCoeff=-0.0012;MLEAC=4,3;MLEAF=0.000799,0.000599;MQ=23.58;MQRankSum=-0.579;QD=1.27;ReadPosRankSum=-0.131;SOR=1.742
chr21	8208892	2904	5'ETS	C	T,*	8633.57	SNV	AC=6,3;AF=0.0012,0.000599;AN=5008;BaseQRankSum=-3.322;ClippingRankSum=0.000;DP=127172;ExcessHet=3.0416;FS=0.000;InbreedingCoeff=-0.0016;MLEAC=6,3;MLEAF=0.0012,0.000599;MQ=20.79;MQRankSum=4.406;QD=1.17;ReadPosRankSum=0.125;SOR=0.867
chr21	8208896	2908	5'ETS	C	T,*	7326.54	SNV	AC=2,3;AF=0.000399,0.000599;AN=5008;BaseQRankSum=-2.374;ClippingRankSum=0.000;DP=120742;ExcessHet=3.0190;FS=0.000;InbreedingCoeff=-0.0009;MLEAC=2,3;MLEAF=0.000399,0.000599;MQ=15.62;MQRankSum=7.774;QD=2.30;ReadPosRankSum=0.324;SOR=0.109
chr21	8208913	2925	5'ETS	C	T	5106.42	SNV	AC=6;AF=0.0012;AN=5008;BaseQRankSum=-1.422;ClippingRankSum=0.000;DP=127300;ExcessHet=3.0580;FS=0.000;InbreedingCoeff=-0.0017;MLEAC=6;MLEAF=0.0012;MQ=23.92;MQRankSum=1.328;QD=1.05;ReadPosRankSum=-0.684;SOR=0.249
chr21	8208925	2937	5'ETS	T	C	1473.56	SNV	AC=5;AF=0.000998;AN=5008;BaseQRankSum=1.912;ClippingRankSum=0.000;DP=125084;ExcessHet=3.0285;FS=0.000;InbreedingCoeff=-0.0012;MLEAC=5;MLEAF=0.000998;MQ=23.84;MQRankSum=2.211;QD=0.39;ReadPosRankSum=0.853;SOR=0.708
chr21	8208934	2946	5'ETS	C	T	131475	SNV	AC=98;AF=0.0196;AN=5008;BaseQRankSum=-5.747;ClippingRankSum=0.000;DP=228670;ExcessHet=9.6132;FS=0.000;InbreedingCoeff=-0.0225;MLEAC=96;MLEAF=0.0192;MQ=23.69;MQRankSum=2.281;QD=1.61;ReadPosRankSum=1.249;SOR=0.656
chr21	8208947	2959	5'ETS	C	T	28891.1	SNV	AC=22;AF=0.00439;AN=5008;BaseQRankSum=-6.291;ClippingRankSum=0.000;DP=148589;ExcessHet=3.4414;FS=0.000;InbreedingCoeff=-0.0054;MLEAC=21;MLEAF=0.00419;MQ=23.83;MQRankSum=4.795;QD=1.59;ReadPosRankSum=0.246;SOR=3.274
chr21	8208951	2963	5'ETS	T	A	15038.6	SNV	AC=18;AF=0.00359;AN=5008;BaseQRankSum=-0.009;ClippingRankSum=0.000;DP=150219;ExcessHet=3.4684;FS=0.000;InbreedingCoeff=-0.0052;MLEAC=18;MLEAF=0.00359;MQ=23.93;MQRankSum=0.647;QD=1.01;ReadPosRankSum=-0.619;SOR=0.637
chr21	8208960	2972	5'ETS	GGGGCCC	G	13916.8	INDEL	AC=11;AF=0.0022;AN=5008;BaseQRankSum=0.322;ClippingRankSum=0.000;DP=125280;ExcessHet=3.0581;FS=0.000;InbreedingCoeff=-0.0022;MLEAC=11;MLEAF=0.0022;MQ=23.70;MQRankSum=2.565;QD=2.28;ReadPosRankSum=-0.056;SOR=1.409
chr21	8253170	2973	5'ETS	CCGGGCCGGGGCATCGG	C	229.54	INDEL	AC=6;AF=0.0395;AN=152;DP=649;ExcessHet=0.0000;FS=0.000;InbreedingCoeff=-0.0311;MLEAC=6;MLEAF=0.0395;MQ=4.58;QD=32.79;SOR=2.584
chr21	8253182	2985	5'ETS	A	C,*	416.89	SNV	AC=2,6;AF=0.25,0.75;AN=8;DP=503;ExcessHet=3.0103;FS=0.000;MLEAC=1,6;MLEAF=0.125,0.75;MQ=1.39;QD=46.32;SOR=3.056
chr21	8208979	2991	5'ETS	C	T,CG,A	33349.4	SNV	AC=19,1,3;AF=0.00379,0.0002,0.000599;AN=5008;BaseQRankSum=-1.322;ClippingRankSum=0.000;DP=133102;ExcessHet=3.2312;FS=0.000;InbreedingCoeff=-0.0037;MLEAC=19,1,3;MLEAF=0.00379,0.0002,0.000599;MQ=24.00;MQRankSum=0.760;QD=2.62;ReadPosRankSum=0.229;SOR=0.530
chr21	8208984	2996	5'ETS	C	G	2447.3	SNV	AC=5;AF=0.000998;AN=5008;BaseQRankSum=0.557;ClippingRankSum=0.000;DP=119957;ExcessHet=3.0190;FS=0.000;InbreedingCoeff=-0.0010;MLEAC=5;MLEAF=0.000998;MQ=22.28;MQRankSum=2.825;QD=1.47;ReadPosRankSum=0.908;SOR=0.189
chr21	8208985	2997	5'ETS	C	T	5385.56	SNV	AC=4;AF=0.000799;AN=5008;BaseQRankSum=-1.093;ClippingRankSum=0.000;DP=121914;ExcessHet=3.0285;FS=0.000;InbreedingCoeff=-0.0011;MLEAC=4;MLEAF=0.000799;MQ=24.67;MQRankSum=1.758;QD=2.46;ReadPosRankSum=1.037;SOR=0.121
chr21	8208995	3007	5'ETS	C	T	743.49	SNV	AC=4;AF=0.000799;AN=5008;BaseQRankSum=-1.274;ClippingRankSum=0.000;DP=120215;ExcessHet=3.0155;FS=0.000;InbreedingCoeff=-0.0008;MLEAC=4;MLEAF=0.000799;MQ=24.47;MQRankSum=-1.635;QD=0.59;ReadPosRankSum=-2.511;SOR=0.101
chr21	8208996	3008	5'ETS	C	T,G	3945.45	SNV	AC=2,1;AF=0.000399,0.0002;AN=5008;BaseQRankSum=-3.995;ClippingRankSum=0.000;DP=119459;ExcessHet=3.0129;FS=0.000;InbreedingCoeff=-0.0006;MLEAC=2,1;MLEAF=0.000399,0.0002;MQ=23.78;MQRankSum=3.048;QD=3.56;ReadPosRankSum=2.537;SOR=0.100
chr21	8209010	3022	5'ETS	G	T	4195.43	SNV	AC=10;AF=0.002;AN=5008;BaseQRankSum=-1.175;ClippingRankSum=0.000;DP=121080;ExcessHet=3.0581;FS=0.000;InbreedingCoeff=-0.0021;MLEAC=10;MLEAF=0.002;MQ=24.59;MQRankSum=0.723;QD=1.35;ReadPosRankSum=0.625;SOR=0.373
chr21	8209019	3031	5'ETS	G	GCGC,C,A,GCAC	4117.26	SNV	AC=2,3,1,1;AF=0.000399,0.000599,0.0002,0.0002;AN=5008;BaseQRankSum=-0.391;ClippingRankSum=0.000;DP=118592;ExcessHet=3.0285;FS=0.000;InbreedingCoeff=-0.0012;MLEAC=2,1,1,1;MLEAF=0.000399,0.0002,0.0002,0.0002;MQ=24.99;MQRankSum=0.613;QD=2.45;ReadPosRankSum=1.071;SOR=1.333
chr21	8209037	3049	5'ETS	C	T	5121.95	SNV	AC=17;AF=0.00339;AN=5008;BaseQRankSum=-0.254;ClippingRankSum=0.000;DP=118250;ExcessHet=3.2926;FS=0.000;InbreedingCoeff=-0.0045;MLEAC=16;MLEAF=0.00319;MQ=25.78;MQRankSum=1.180;QD=2.08;ReadPosRankSum=0.140;SOR=0.091
chr21	8209055	3067	5'ETS	G	GT	3300.81	SNV	AC=11;AF=0.0022;AN=5008;BaseQRankSum=0.448;ClippingRankSum=0.000;DP=114087;ExcessHet=3.0581;FS=0.000;InbreedingCoeff=-0.0024;MLEAC=11;MLEAF=0.0022;MQ=25.77;MQRankSum=0.530;QD=3.62;ReadPosRankSum=-0.350;SOR=0.636
chr21	8209058	3070	5'ETS	T	C	226.43	SNV	AC=3;AF=0.000599;AN=5008;BaseQRankSum=0.417;ClippingRankSum=0.000;DP=115200;ExcessHet=4.5306;FS=0.000;InbreedingCoeff=-0.0079;MLEAC=3;MLEAF=0.000599;MQ=26.28;MQRankSum=-0.676;QD=1.32;ReadPosRankSum=0.227;SOR=0.132
chr21	8209069	3081	5'ETS	A	G	511.94	SNV	AC=7;AF=0.0014;AN=5006;BaseQRankSum=0.523;ClippingRankSum=0.000;DP=111392;ExcessHet=6.3613;FS=0.000;InbreedingCoeff=-0.0118;MLEAC=5;MLEAF=0.000999;MQ=25.46;MQRankSum=0.215;QD=1.71;ReadPosRankSum=0.329;SOR=0.349
chr21	8209077	3089	5'ETS	G	A,C	659.3	SNV	AC=3,1;AF=0.0006,0.0002;AN=5002;BaseQRankSum=0.811;ClippingRankSum=0.000;DP=99414;ExcessHet=3.0156;FS=0.000;InbreedingCoeff=0.0043;MLEAC=2,1;MLEAF=0.0004,0.0002;MQ=25.02;MQRankSum=-1.045;QD=2.66;ReadPosRankSum=1.507;SOR=0.839
chr21	8209106	3118	5'ETS	GGGCTTCGGCC	G	262.87	INDEL	AC=3;AF=0.000693;AN=4332;BaseQRankSum=-0.000;ClippingRankSum=-0.000;DP=35688;ExcessHet=3.0204;FS=5.714;InbreedingCoeff=-0.0814;MLEAC=3;MLEAF=0.000693;MQ=5.55;MQRankSum=1.780;QD=10.51;ReadPosRankSum=1.960;SOR=0.027
chr21	8209110	3122	5'ETS	TTCGGCCGGCCCCGGGCCC	TCCGGGCCC,T,*	2008.22	INDEL	AC=1,2,3;AF=0.000658,0.00132,0.00197;AN=1520;BaseQRankSum=-0.000;ClippingRankSum=0.000;DP=19540;ExcessHet=3.2566;FS=9.445;InbreedingCoeff=0.2701;MLEAC=1,2,3;MLEAF=0.000658,0.00132,0.00197;MQ=1.99;MQRankSum=2.260;QD=35.23;ReadPosRankSum=2.655;SOR=0.025
chr21	8209114	3126	5'ETS	GCCGGCC	G,*	8451.94	INDEL	AC=45,6;AF=0.0236,0.00315;AN=1906;BaseQRankSum=0.000;ClippingRankSum=-0.000;DP=15678;ExcessHet=0.0000;FS=7.639;InbreedingCoeff=0.1752;MLEAC=39,8;MLEAF=0.0205,0.0042;MQ=5.93;MQRankSum=1.811;QD=35.22;ReadPosRankSum=1.150;SOR=0.131
chr21	8209116	3128	5'ETS	C	CG,CGGGCCCCGGCCG,*	19664.7	SNV	AC=232,3,50;AF=0.112,0.00145,0.0241;AN=2076;BaseQRankSum=-0.000;ClippingRankSum=-0.000;DP=11950;ExcessHet=-0.0000;FS=4.344;InbreedingCoeff=0.4951;MLEAC=149,2,41;MLEAF=0.0718,0.000963,0.0197;MQ=9.05;MQRankSum=-0.967;QD=37.82;ReadPosRankSum=0.674;SOR=0.329
chr21	8209117	3129	5'ETS	G	GT,*	7938.85	SNV	AC=2,47;AF=0.000801,0.0188;AN=2496;BaseQRankSum=0.431;ClippingRankSum=-0.000;DP=12858;ExcessHet=-0.0000;FS=3.457;InbreedingCoeff=0.1674;MLEAC=2,40;MLEAF=0.000801,0.016;MQ=1.72;MQRankSum=1.834;QD=36.09;ReadPosRankSum=0.967;SOR=0.273
chr21	8209118	3130	5'ETS	G	GGC,*	14850	INDEL	AC=24,47;AF=0.00786,0.0154;AN=3052;BaseQRankSum=0.000;ClippingRankSum=0.000;DP=12465;ExcessHet=-0.0000;FS=0.000;InbreedingCoeff=0.1930;MLEAC=20,37;MLEAF=0.00655,0.0121;MQ=5.79;MQRankSum=-1.834;QD=40.57;ReadPosRankSum=1.748;SOR=0.747
chr21	8209119	3131	5'ETS	C	G,*	7125.1	SNV	AC=18,47;AF=0.0058,0.0152;AN=3102;DP=12063;ExcessHet=-0.0000;FS=1.614;InbreedingCoeff=0.1755;MLEAC=11,45;MLEAF=0.00355,0.0145;MQ=2.55;QD=33.14;SOR=0.401
chr21	8209147	3159	5'ETS	G	A	131.58	SNV	AC=5;AF=0.00105;AN=4760;BaseQRankSum=-0.000;ClippingRankSum=-0.000;DP=12825;ExcessHet=0.0000;FS=0.000;InbreedingCoeff=-0.0279;MLEAC=3;MLEAF=0.00063;MQ=7.70;MQRankSum=0.319;QD=11.96;ReadPosRankSum=1.150;SOR=3.442
chr21	8253394	3197	5'ETS	C	A	1417.56	SNV	AC=54;AF=0.0123;AN=4380;BaseQRankSum=-0.000;ClippingRankSum=-0.000;DP=7359;ExcessHet=0.0023;FS=0.000;InbreedingCoeff=-0.0908;MLEAC=66;MLEAF=0.0151;MQ=18.93;MQRankSum=-0.000;QD=6.72;ReadPosRankSum=-0.000;SOR=0.730
chr21	8209192	3204	5'ETS	C	A	1350.64	SNV	AC=47;AF=0.0162;AN=2904;BaseQRankSum=-0.000;ClippingRankSum=-0.000;DP=4264;ExcessHet=0.0000;FS=0.000;InbreedingCoeff=-0.1327;MLEAC=64;MLEAF=0.022;MQ=19.33;MQRankSum=-0.253;QD=11.85;ReadPosRankSum=-0.000;SOR=0.973
chr21	8253423	3226	5'ETS	T	C	38.1	SNV	AC=4;AF=0.000892;AN=4484;BaseQRankSum=0.674;ClippingRankSum=-0.000;DP=7348;ExcessHet=3.1314;FS=0.000;InbreedingCoeff=-0.0857;MLEAC=3;MLEAF=0.000669;MQ=15.59;MQRankSum=-0.000;QD=2.72;ReadPosRankSum=-0.000;SOR=0.247
chr21	8253434	3237	5'ETS	C	G	107.52	SNV	AC=7;AF=0.00155;AN=4504;BaseQRankSum=-0.000;ClippingRankSum=-0.000;DP=7301;ExcessHet=3.0543;FS=0.000;InbreedingCoeff=-0.0843;MLEAC=6;MLEAF=0.00133;MQ=21.03;MQRankSum=-0.000;QD=2.91;ReadPosRankSum=0.549;SOR=0.260
chr21	8209570	3582	5'ETS	TCG	T	182.57	INDEL	AC=4;AF=0.00218;AN=1832;DP=1376;ExcessHet=0.0000;FS=0.000;InbreedingCoeff=-0.1487;MLEAC=2;MLEAF=0.00109;MQ=5.89;QD=45.64;SOR=3.258
chr21	8209575	3587	5'ETS	AGGCCCCCCGGCCGGCCGTCCGGCCGCGTCGGGGCCTCGC	A	185.99	INDEL	AC=4;AF=0.00229;AN=1748;DP=1326;ExcessHet=0.0000;FS=0.000;InbreedingCoeff=-0.1597;MLEAC=2;MLEAF=0.00114;MQ=5.73;QD=46.50;SOR=3.258
chr21	8209614	3626	5'ETS	C	A,*	636.69	SNV	AC=22,4;AF=0.0217,0.00394;AN=1014;BaseQRankSum=-0.000;ClippingRankSum=-0.000;DP=899;ExcessHet=0.0000;FS=0.000;InbreedingCoeff=0.1692;MLEAC=17,2;MLEAF=0.0168,0.00197;MQ=9.13;MQRankSum=0.431;QD=26.53;ReadPosRankSum=0.674;SOR=3.056
chr21	8210253	4265	18S	G	A	940.03	SNV	AC=36;AF=1;AN=36;DP=242;ExcessHet=3.0103;FS=0.000;InbreedingCoeff=-0.1195;MLEAC=36;MLEAF=1;MQ=13.93;QD=29.38;SOR=0.941
chr21	8210274	4286	18S	G	A	698.96	SNV	AC=26;AF=0.929;AN=28;DP=308;ExcessHet=0.0812;FS=0.000;InbreedingCoeff=0.1875;MLEAC=27;MLEAF=0.964;MQ=10.47;QD=26.88;SOR=0.693
chr21	8210295	4307	18S	G	C	522.22	SNV	AC=24;AF=0.923;AN=26;DP=302;ExcessHet=0.0877;FS=0.000;InbreedingCoeff=0.1363;MLEAC=25;MLEAF=0.962;MQ=9.12;QD=32.64;SOR=1.127
chr21	8210321	4333	18S	GGAGC	G	102.27	INDEL	AC=4;AF=0.667;AN=6;DP=6;ExcessHet=0.4576;FS=0.000;MLEAC=4;MLEAF=0.667;MQ=34.64;QD=51.13;SOR=1.179
chr21	8210328	4340	18S	G	A	116.27	SNV	AC=4;AF=1;AN=4;DP=4;ExcessHet=3.0103;FS=0.000;MLEAC=4;MLEAF=1;MQ=34.64;QD=58.14;SOR=1.179
chr21	8210333	4345	18S	C	T	116.27	SNV	AC=4;AF=1;AN=4;DP=4;ExcessHet=3.0103;FS=0.000;MLEAC=4;MLEAF=1;MQ=34.64;QD=58.14;SOR=1.179
chr21	8210336	4348	18S	TCCGCCGCGAGGCGAGCCACCGCCC	T	107.21	INDEL	AC=4;AF=1;AN=4;DP=4;ExcessHet=3.0103;FS=0.000;MLEAC=4;MLEAF=1;MQ=34.64;QD=53.60;SOR=1.179
chr21	8210608	4620	18S	G	A	73.97	SNV	AC=4;AF=0.333;AN=12;DP=127;ExcessHet=0.0663;FS=0.000;MLEAC=4;MLEAF=0.333;MQ=6.25;QD=36.98;SOR=2.833
chr21	8255004	4807	18S	G	T	35.25	SNV	AC=4;AF=0.015;AN=266;DP=149;ExcessHet=0.0001;FS=0.000;InbreedingCoeff=-0.1092;MLEAC=4;MLEAF=0.015;MQ=28.28;QD=8.81;SOR=0.693
chr21	8212485	6497	ITS1	TG	T	1965.08	SNV	AC=83;AF=0.669;AN=124;BaseQRankSum=-0.000;ClippingRankSum=-0.000;DP=167;ExcessHet=-0.0000;FS=0.000;InbreedingCoeff=0.3796;MLEAC=90;MLEAF=0.726;MQ=18.98;MQRankSum=-0.967;QD=33.88;ReadPosRankSum=-0.000;SOR=7.223
chr21	8256695	6498	ITS1	GGC	G	101.37	INDEL	AC=4;AF=0.00752;AN=532;DP=430;ExcessHet=0.0000;FS=0.000;InbreedingCoeff=-0.1446;MLEAC=3;MLEAF=0.00564;MQ=3.83;QD=25.34;SOR=3.258
chr21	8256702	6505	ITS1	G	T	471.9	SNV	AC=14;AF=0.0257;AN=544;DP=511;ExcessHet=0.0000;FS=0.000;InbreedingCoeff=-0.0667;MLEAC=14;MLEAF=0.0257;MQ=5.94;QD=31.46;SOR=5.549
chr21	8256703	6506	ITS1	G	T	473.41	SNV	AC=14;AF=0.0268;AN=522;DP=518;ExcessHet=0.0000;FS=0.000;InbreedingCoeff=-0.0689;MLEAC=14;MLEAF=0.0268;MQ=5.69;QD=31.56;SOR=5.549
chr21	8256704	6507	ITS1	G	C	107.61	SNV	AC=4;AF=0.00538;AN=744;DP=519;ExcessHet=0.0000;FS=0.000;InbreedingCoeff=-0.1580;MLEAC=3;MLEAF=0.00403;MQ=4.73;QD=26.90;SOR=3.258
chr21	8256936	6739	5.8S	T	C	239.93	SNV	AC=10;AF=0.00231;AN=4320;BaseQRankSum=-0.000;ClippingRankSum=-0.000;DP=7834;ExcessHet=3.3194;FS=0.000;InbreedingCoeff=-0.0849;MLEAC=10;MLEAF=0.00231;MQ=18.53;MQRankSum=-0.000;QD=4.28;ReadPosRankSum=-0.000;SOR=0.392
chr21	8257017	6820	ITS2	C	T	48.2	SNV	AC=6;AF=0.0014;AN=4290;BaseQRankSum=-0.000;ClippingRankSum=-0.000;DP=8077;ExcessHet=3.0785;FS=0.000;InbreedingCoeff=-0.0822;MLEAC=6;MLEAF=0.0014;MQ=14.69;MQRankSum=0.431;QD=2.54;ReadPosRankSum=0.524;SOR=0.616
chr21	8212838	6850	ITS2	G	A	58.02	SNV	AC=6;AF=0.00122;AN=4914;BaseQRankSum=-0.000;ClippingRankSum=-0.000;DP=34883;ExcessHet=3.0794;FS=0.000;InbreedingCoeff=-0.0206;MLEAC=5;MLEAF=0.00102;MQ=26.65;MQRankSum=0.253;QD=1.61;ReadPosRankSum=-0.820;SOR=0.195
chr21	8257047	6850	ITS2	G	A	40.1	SNV	AC=5;AF=0.00117;AN=4278;BaseQRankSum=-0.000;ClippingRankSum=-0.000;DP=7544;ExcessHet=0.1104;FS=0.000;InbreedingCoeff=-0.0781;MLEAC=4;MLEAF=0.000935;MQ=15.58;MQRankSum=0.549;QD=1.74;ReadPosRankSum=0.135;SOR=0.368
chr21	8257063	6866	ITS2	T	C	61.36	SNV	AC=3;AF=0.000718;AN=4180;BaseQRankSum=-0.000;ClippingRankSum=-0.000;DP=7438;ExcessHet=0.0994;FS=0.000;InbreedingCoeff=-0.0986;MLEAC=2;MLEAF=0.000478;MQ=8.93;MQRankSum=0.157;QD=6.82;ReadPosRankSum=0.792;SOR=0.425
chr21	8212862	6874	ITS2	C	T	654.04	SNV	AC=3;AF=0.000602;AN=4982;BaseQRankSum=-2.345;ClippingRankSum=0.000;DP=46260;ExcessHet=3.0190;FS=0.000;InbreedingCoeff=-0.0116;MLEAC=3;MLEAF=0.000602;MQ=37.39;MQRankSum=0.203;QD=5.79;ReadPosRankSum=-1.691;SOR=0.203
chr21	8212872	6884	ITS2	T	G	380.36	SNV	AC=7;AF=0.00144;AN=4852;BaseQRankSum=-1.383;ClippingRankSum=0.000;DP=50232;ExcessHet=90.9415;FS=0.000;InbreedingCoeff=-0.1058;MLEAC=7;MLEAF=0.00144;MQ=31.15;MQRankSum=0.355;QD=6.67;ReadPosRankSum=0.028;SOR=0.036
chr21	8257081	6884	ITS2	T	G	89.19	SNV	AC=8;AF=0.00196;AN=4084;BaseQRankSum=-0.566;ClippingRankSum=-0.000;DP=6803;ExcessHet=3.7753;FS=0.000;InbreedingCoeff=-0.1205;MLEAC=11;MLEAF=0.00269;MQ=11.64;MQRankSum=0.524;QD=1.75;ReadPosRankSum=0.566;SOR=0.358
chr21	8212875	6887	ITS2	C	T	240.24	SNV	AC=3;AF=0.000602;AN=4982;BaseQRankSum=0.000;ClippingRankSum=0.000;DP=60157;ExcessHet=3.1023;FS=0.000;InbreedingCoeff=-0.0124;MLEAC=3;MLEAF=0.000602;MQ=38.41;MQRankSum=0.763;QD=2.45;ReadPosRankSum=0.380;SOR=0.032
chr21	8212884	6896	ITS2	C	T	1013.35	SNV	AC=3;AF=0.000601;AN=4988;BaseQRankSum=-1.741;ClippingRankSum=-0.000;DP=63954;ExcessHet=3.0582;FS=0.000;InbreedingCoeff=-0.0086;MLEAC=3;MLEAF=0.000601;MQ=37.72;MQRankSum=0.060;QD=9.93;ReadPosRankSum=-0.000;SOR=0.459
chr21	8212895	6907	ITS2	G	C	131.72	SNV	AC=7;AF=0.00141;AN=4954;BaseQRankSum=0.000;ClippingRankSum=-0.000;DP=67025;ExcessHet=8.1316;FS=0.000;InbreedingCoeff=-0.0307;MLEAC=7;MLEAF=0.00141;MQ=25.38;MQRankSum=0.081;QD=2.44;ReadPosRankSum=0.366;SOR=0.109
chr21	8212898	6910	ITS2	T	G	324.37	SNV	AC=30;AF=0.00628;AN=4774;BaseQRankSum=-1.874;ClippingRankSum=0.000;DP=73863;ExcessHet=179.5225;FS=0.000;InbreedingCoeff=-0.1441;MLEAC=14;MLEAF=0.00293;MQ=36.65;MQRankSum=-0.180;QD=0.97;ReadPosRankSum=0.767;SOR=0.013
chr21	8257112	6915	ITS2	A	C	38.02	SNV	AC=4;AF=0.000993;AN=4030;BaseQRankSum=-1.645;ClippingRankSum=-0.000;DP=6603;ExcessHet=0.1089;FS=0.000;InbreedingCoeff=-0.1170;MLEAC=3;MLEAF=0.000744;MQ=10.15;MQRankSum=0.524;QD=2.72;ReadPosRankSum=0.524;SOR=0.155
chr21	8212913	6925	ITS2	T	G	70.64	SNV	AC=9;AF=0.00185;AN=4856;BaseQRankSum=-2.119;ClippingRankSum=-0.000;DP=78782;ExcessHet=64.3780;FS=0.000;InbreedingCoeff=-0.0938;MLEAC=2;MLEAF=0.000412;MQ=36.23;MQRankSum=-0.000;QD=2.14;ReadPosRankSum=0.712;SOR=0.008
chr21	8212916	6928	ITS2	C	CG	1663.6	SNV	AC=6;AF=0.00121;AN=4952;BaseQRankSum=-0.755;ClippingRankSum=0.000;DP=78820;ExcessHet=0.0195;FS=0.000;InbreedingCoeff=0.0069;MLEAC=4;MLEAF=0.000808;MQ=36.48;MQRankSum=1.012;QD=19.57;ReadPosRankSum=-1.085;SOR=0.246
chr21	8212923	6935	ITS2	G	C	513.13	SNV	AC=6;AF=0.00124;AN=4852;BaseQRankSum=-0.000;ClippingRankSum=-0.000;DP=79514;ExcessHet=4.1036;FS=0.000;InbreedingCoeff=-0.0208;MLEAC=6;MLEAF=0.00124;MQ=16.71;MQRankSum=2.417;QD=7.23;ReadPosRankSum=-0.524;SOR=0.327
chr21	8212924	6936	ITS2	A	C	6340.36	SNV	AC=190;AF=0.0407;AN=4674;BaseQRankSum=-0.997;ClippingRankSum=-0.000;DP=87579;ExcessHet=345.1638;FS=0.000;InbreedingCoeff=-0.2024;MLEAC=198;MLEAF=0.0424;MQ=37.70;MQRankSum=-0.248;QD=1.28;ReadPosRankSum=0.496;SOR=0.016
chr21	8257133	6936	ITS2	A	C	1842.8	SNV	AC=29;AF=0.00812;AN=3572;BaseQRankSum=-0.674;ClippingRankSum=-0.000;DP=6075;ExcessHet=0.0150;FS=0.000;InbreedingCoeff=-0.1439;MLEAC=29;MLEAF=0.00812;MQ=10.52;MQRankSum=-0.000;QD=13.07;ReadPosRankSum=-0.431;SOR=0.474
chr21	8212926	6938	ITS2	A	C,G	1084.39	SNV	AC=31,5;AF=0.00659,0.00106;AN=4704;BaseQRankSum=-1.056;ClippingRankSum=-0.000;DP=89338;ExcessHet=4.0168;FS=0.000;InbreedingCoeff=0.0676;MLEAC=22,4;MLEAF=0.00468,0.00085;MQ=35.84;MQRankSum=0.000;QD=1.84;ReadPosRankSum=0.594;SOR=0.009
chr21	8257135	6938	ITS2	A	C	84.71	SNV	AC=9;AF=0.0024;AN=3750;BaseQRankSum=-0.674;ClippingRankSum=-0.000;DP=5839;ExcessHet=0.1732;FS=0.000;InbreedingCoeff=-0.1334;MLEAC=12;MLEAF=0.0032;MQ=8.01;MQRankSum=-0.000;QD=2.07;ReadPosRankSum=-0.431;SOR=0.334
chr21	8212931	6943	ITS2	G	C	2468.52	SNV	AC=4;AF=0.000809;AN=4944;BaseQRankSum=0.019;ClippingRankSum=0.000;DP=89211;ExcessHet=3.6356;FS=0.000;InbreedingCoeff=-0.0201;MLEAC=4;MLEAF=0.000809;MQ=34.79;MQRankSum=3.001;QD=18.99;ReadPosRankSum=0.789;SOR=0.559
chr21	8212943	6955	ITS2	T	G	91.55	SNV	AC=16;AF=0.00336;AN=4764;BaseQRankSum=-2.424;ClippingRankSum=0.000;DP=88437;ExcessHet=21.7945;FS=0.000;InbreedingCoeff=-0.0709;MLEAC=10;MLEAF=0.0021;MQ=33.97;MQRankSum=-0.000;QD=0.39;ReadPosRankSum=0.354;SOR=0.022
chr21	8212945	6957	ITS2	A	T	187.91	SNV	AC=5;AF=0.00104;AN=4794;BaseQRankSum=-1.199;ClippingRankSum=0.000;DP=94583;ExcessHet=35.8181;FS=0.000;InbreedingCoeff=-0.0764;MLEAC=2;MLEAF=0.000417;MQ=33.49;MQRankSum=-0.080;QD=6.26;ReadPosRankSum=0.528;SOR=0.008
chr21	8257161	6964	ITS2	C	CG	327.02	SNV	AC=10;AF=0.00282;AN=3548;BaseQRankSum=-0.000;ClippingRankSum=-0.000;DP=4434;ExcessHet=0.0000;FS=0.000;InbreedingCoeff=-0.1042;MLEAC=7;MLEAF=0.00197;MQ=9.09;MQRankSum=-0.000;QD=25.16;ReadPosRankSum=0.674;SOR=3.126
chr21	8212957	6969	ITS2	A	G	1232.6	SNV	AC=36;AF=0.00758;AN=4748;BaseQRankSum=-0.385;ClippingRankSum=0.000;DP=95487;ExcessHet=35.6122;FS=0.000;InbreedingCoeff=-0.0728;MLEAC=33;MLEAF=0.00695;MQ=33.23;MQRankSum=-0.783;QD=4.57;ReadPosRankSum=0.282;SOR=0.018
chr21	8257166	6969	ITS2	A	G	4282	SNV	AC=158;AF=0.0551;AN=2866;BaseQRankSum=-0.000;ClippingRankSum=-0.000;DP=4251;ExcessHet=-0.0000;FS=0.000;InbreedingCoeff=-0.0077;MLEAC=142;MLEAF=0.0495;MQ=12.45;MQRankSum=-0.000;QD=15.18;ReadPosRankSum=-0.000;SOR=0.880
chr21	8212965	6977	ITS2	G	T	86.88	SNV	AC=3;AF=0.000613;AN=4892;BaseQRankSum=0.447;ClippingRankSum=-0.000;DP=93340;ExcessHet=3.1646;FS=0.000;InbreedingCoeff=-0.0229;MLEAC=3;MLEAF=0.000613;MQ=28.55;MQRankSum=1.645;QD=3.34;ReadPosRankSum=0.524;SOR=0.202
chr21	8396037	7002	ITS2	AGCCGGCTCGGGCCGAGTTCCCGTGGCC	A	1521.77	INDEL	AC=6;AF=0.0375;AN=160;ClippingRankSum=0.000;DP=226;ExcessHet=3.4376;FS=0.000;InbreedingCoeff=-0.1960;MLEAC=10;MLEAF=0.0625;MQ=35.19;MQRankSum=0.188;QD=11.44;SOR=0.237
chr21	8212995	7007	ITS2	AAG	A,*	4767.81	INDEL	AC=14,1;AF=0.00346,0.000247;AN=4044;BaseQRankSum=-0.835;ClippingRankSum=0.000;DP=104952;ExcessHet=0.0681;FS=0.000;InbreedingCoeff=0.0531;MLEAC=14,1;MLEAF=0.00346,0.000247;MQ=37.12;MQRankSum=0.460;QD=7.19;ReadPosRankSum=0.425;SOR=0.090
chr21	8396042	7007	ITS2	G	A,*	1571.7	SNV	AC=4,6;AF=0.000958,0.00144;AN=4174;BaseQRankSum=-0.000;ClippingRankSum=-0.000;DP=6536;ExcessHet=3.0745;FS=0.000;InbreedingCoeff=0.0611;MLEAC=4,7;MLEAF=0.000958,0.00168;MQ=10.74;MQRankSum=0.210;QD=10.14;ReadPosRankSum=0.480;SOR=0.268
chr21	8213002	7014	ITS2	AGCCGGCTCGGGCCGAGTTCCCGTGGCC	A	3438.91	INDEL	AC=9;AF=0.00217;AN=4156;BaseQRankSum=1.091;ClippingRankSum=0.000;DP=106002;ExcessHet=3.1725;FS=0.000;InbreedingCoeff=-0.0254;MLEAC=9;MLEAF=0.00217;MQ=37.68;MQRankSum=-0.417;QD=3.53;ReadPosRankSum=-2.824;SOR=0.023
chr21	8213007	7019	ITS2	G	A,*	12335	SNV	AC=15,9;AF=0.003,0.0018;AN=5006;BaseQRankSum=0.000;ClippingRankSum=0.000;DP=123531;ExcessHet=3.2553;FS=0.000;InbreedingCoeff=-0.0005;MLEAC=15,9;MLEAF=0.003,0.0018;MQ=24.31;MQRankSum=-0.578;QD=7.05;ReadPosRankSum=0.843;SOR=0.107
chr21	8257216	7019	ITS2	G	A	298.75	SNV	AC=18;AF=0.00896;AN=2008;BaseQRankSum=-0.000;ClippingRankSum=-0.000;DP=2077;ExcessHet=0.0000;FS=0.000;InbreedingCoeff=-0.1368;MLEAC=21;MLEAF=0.0105;MQ=6.34;MQRankSum=-0.000;QD=9.64;ReadPosRankSum=-0.000;SOR=2.517
chr21	8213011	7023	ITS2	G	C,*	6651.61	SNV	AC=1,9;AF=0.0002,0.0018;AN=5008;BaseQRankSum=3.059;ClippingRankSum=0.000;DP=137459;ExcessHet=3.0495;FS=0.000;InbreedingCoeff=-0.0015;MLEAC=1,9;MLEAF=0.0002,0.0018;MQ=18.05;MQRankSum=1.176;QD=5.14;ReadPosRankSum=3.268;SOR=0.053
chr21	8396063	7028	ITS2	C	G,*	1677.48	SNV	AC=2,6;AF=0.0004,0.0012;AN=5000;BaseQRankSum=0.660;ClippingRankSum=0.000;DP=43354;ExcessHet=3.0350;FS=0.000;InbreedingCoeff=0.0057;MLEAC=2,6;MLEAF=0.0004,0.0012;MQ=21.08;MQRankSum=1.431;QD=8.69;ReadPosRankSum=0.411;SOR=0.180
chr21	8213017	7029	ITS2	A	G,*	5490.92	SNV	AC=2,9;AF=0.000399,0.0018;AN=5008;BaseQRankSum=0.929;ClippingRankSum=0.000;DP=145562;ExcessHet=3.0581;FS=0.000;InbreedingCoeff=-0.0021;MLEAC=2,9;MLEAF=0.000399,0.0018;MQ=19.94;MQRankSum=1.174;QD=4.16;ReadPosRankSum=-0.305;SOR=0.036
chr21	8213019	7031	ITS2	T	C,*	3779.48	SNV	AC=3,9;AF=0.000599,0.0018;AN=5008;BaseQRankSum=0.954;ClippingRankSum=0.000;DP=146865;ExcessHet=3.0677;FS=0.000;InbreedingCoeff=-0.0021;MLEAC=2,9;MLEAF=0.000399,0.0018;MQ=15.26;MQRankSum=1.010;QD=3.16;ReadPosRankSum=2.216;SOR=0.025
chr21	8213020	7032	ITS2	T	C,A,*	4213.92	SNV	AC=2,1,9;AF=0.000399,0.0002,0.0018;AN=5008;BaseQRankSum=0.567;ClippingRankSum=0.000;DP=147451;ExcessHet=3.0677;FS=0.000;InbreedingCoeff=-0.0017;MLEAC=2,1,9;MLEAF=0.000399,0.0002,0.0018;MQ=19.40;MQRankSum=0.934;QD=3.22;ReadPosRankSum=-1.436;SOR=0.028
chr21	8213021	7033	ITS2	C	T,*	3760.6	SNV	AC=1,9;AF=0.0002,0.0018;AN=5008;BaseQRankSum=0.683;ClippingRankSum=0.000;DP=147879;ExcessHet=3.0495;FS=0.000;InbreedingCoeff=-0.0016;MLEAC=1,9;MLEAF=0.0002,0.0018;MQ=9.52;MQRankSum=2.752;QD=3.58;ReadPosRankSum=5.355;SOR=0.030
chr21	8213028	7040	ITS2	C	A,G,*	3911.84	SNV	AC=1,2,9;AF=0.0002,0.000399,0.0018;AN=5008;BaseQRankSum=0.561;ClippingRankSum=0.000;DP=149578;ExcessHet=3.0677;FS=0.000;InbreedingCoeff=-0.0021;MLEAC=1,2,9;MLEAF=0.0002,0.000399,0.0018;MQ=21.37;MQRankSum=-0.627;QD=2.61;ReadPosRankSum=-0.449;SOR=0.022
chr21	8213029	7041	ITS2	C	T,*	4157.05	SNV	AC=2,9;AF=0.000399,0.0018;AN=5008;BaseQRankSum=0.000;ClippingRankSum=0.000;DP=149916;ExcessHet=3.0582;FS=0.000;InbreedingCoeff=-0.0019;MLEAC=2,9;MLEAF=0.000399,0.0018;MQ=13.53;MQRankSum=3.285;QD=3.61;ReadPosRankSum=4.336;SOR=0.029
chr21	8213033	7045	ITS2	G	A	317.5	SNV	AC=4;AF=0.000799;AN=5008;BaseQRankSum=0.745;ClippingRankSum=0.000;DP=150518;ExcessHet=3.0190;FS=0.000;InbreedingCoeff=-0.0009;MLEAC=4;MLEAF=0.000799;MQ=37.45;MQRankSum=0.670;QD=1.20;ReadPosRankSum=0.071;SOR=0.031
chr21	8396081	7046	ITS2	G	C	562.95	SNV	AC=7;AF=0.0014;AN=5008;BaseQRankSum=0.000;ClippingRankSum=0.000;DP=69957;ExcessHet=3.0346;FS=0.000;InbreedingCoeff=-0.0020;MLEAC=6;MLEAF=0.0012;MQ=37.76;MQRankSum=0.519;QD=2.64;ReadPosRankSum=0.000;SOR=0.056
chr21	8213038	7050	ITS2	C	T,CGGTCCGG	2130.5	SNV	AC=3,2;AF=0.000599,0.000399;AN=5008;BaseQRankSum=0.500;ClippingRankSum=0.000;DP=151348;ExcessHet=3.0190;FS=0.000;InbreedingCoeff=-0.0010;MLEAC=3,2;MLEAF=0.000599,0.000399;MQ=37.44;MQRankSum=-1.394;QD=3.76;ReadPosRankSum=-1.159;SOR=0.036
chr21	8396089	7054	ITS2	C	T	13964.3	SNV	AC=70;AF=0.014;AN=5008;BaseQRankSum=-0.453;ClippingRankSum=-0.000;DP=78699;ExcessHet=6.2890;FS=0.000;InbreedingCoeff=-0.0164;MLEAC=70;MLEAF=0.014;MQ=38.38;MQRankSum=0.190;QD=4.18;ReadPosRankSum=-0.355;SOR=0.083
chr21	8396091	7056	ITS2	C	CG	255.79	SNV	AC=6;AF=0.0012;AN=5008;BaseQRankSum=0.000;ClippingRankSum=0.000;DP=80010;ExcessHet=3.0675;FS=0.000;InbreedingCoeff=-0.0021;MLEAC=6;MLEAF=0.0012;MQ=38.21;MQRankSum=0.727;QD=1.04;ReadPosRankSum=-0.134;SOR=0.034
chr21	8213046	7058	ITS2	G	C	2865.3	SNV	AC=6;AF=0.0012;AN=5008;BaseQRankSum=0.699;ClippingRankSum=0.000;DP=153009;ExcessHet=3.0233;FS=0.000;InbreedingCoeff=-0.0012;MLEAC=6;MLEAF=0.0012;MQ=38.05;MQRankSum=-0.115;QD=2.71;ReadPosRankSum=-0.761;SOR=0.034
chr21	8396097	7062	ITS2	G	GCTCC,C	424.12	SNV	AC=1,2;AF=0.0002,0.000399;AN=5008;BaseQRankSum=0.411;ClippingRankSum=0.000;DP=82725;ExcessHet=3.0129;FS=0.000;InbreedingCoeff=-0.0002;MLEAC=1,2;MLEAF=0.0002,0.000399;MQ=38.29;MQRankSum=0.892;QD=3.17;ReadPosRankSum=0.640;SOR=0.029
chr21	8213054	7066	ITS2	C	T	46979.4	SNV	AC=75;AF=0.015;AN=5008;BaseQRankSum=-1.981;ClippingRankSum=0.000;DP=164091;ExcessHet=5.6523;FS=0.000;InbreedingCoeff=-0.0154;MLEAC=73;MLEAF=0.0146;MQ=37.80;MQRankSum=0.316;QD=3.82;ReadPosRankSum=-0.341;SOR=0.065
chr21	8213056	7068	ITS2	C	CG	820.03	SNV	AC=4;AF=0.000799;AN=5008;BaseQRankSum=0.352;ClippingRankSum=0.000;DP=164126;ExcessHet=3.0155;FS=0.000;InbreedingCoeff=-0.0008;MLEAC=3;MLEAF=0.000599;MQ=37.86;MQRankSum=-0.716;QD=1.50;ReadPosRankSum=0.136;SOR=0.032
chr21	8257268	7071	ITS2	T	G	755.33	SNV	AC=24;AF=0.245;AN=98;DP=612;ExcessHet=0.0000;FS=0.000;InbreedingCoeff=0.3809;MLEAC=30;MLEAF=0.306;MQ=8.10;QD=26.98;SOR=2.621
chr21	8213062	7074	ITS2	G	T,GCTCC,C	1411.3	SNV	AC=2,1,3;AF=0.000399,0.0002,0.000599;AN=5008;BaseQRankSum=0.394;ClippingRankSum=0.000;DP=165610;ExcessHet=3.0233;FS=0.000;InbreedingCoeff=-0.0012;MLEAC=2,1,3;MLEAF=0.000399,0.0002,0.000599;MQ=37.54;MQRankSum=0.748;QD=1.43;ReadPosRankSum=0.780;SOR=0.021
chr21	8396109	7074	ITS2	C	T	410.51	SNV	AC=3;AF=0.000599;AN=5008;BaseQRankSum=-0.458;ClippingRankSum=0.000;DP=87450;ExcessHet=3.0129;FS=0.000;InbreedingCoeff=-0.0007;MLEAC=3;MLEAF=0.000599;MQ=38.70;MQRankSum=0.820;QD=1.70;ReadPosRankSum=0.381;SOR=0.036
chr21	8257274	7077	ITS2	T	G	112.87	SNV	AC=10;AF=0.00326;AN=3068;BaseQRankSum=-0.524;ClippingRankSum=-0.000;DP=4947;ExcessHet=0.0919;FS=3.110;InbreedingCoeff=-0.1373;MLEAC=16;MLEAF=0.00522;MQ=4.56;MQRankSum=-0.000;QD=3.76;ReadPosRankSum=0.967;SOR=2.406
chr21	8257278	7081	ITS2	T	G	58.74	SNV	AC=6;AF=0.00156;AN=3834;BaseQRankSum=-0.967;ClippingRankSum=-0.000;DP=7535;ExcessHet=4.1045;FS=5.828;InbreedingCoeff=-0.1510;MLEAC=12;MLEAF=0.00313;MQ=5.38;MQRankSum=-0.000;QD=1.78;ReadPosRankSum=0.366;SOR=2.368
chr21	8396126	7091	ITS2	T	C	785.76	SNV	AC=3;AF=0.000599;AN=5008;BaseQRankSum=0.809;ClippingRankSum=0.000;DP=119638;ExcessHet=3.1919;FS=0.000;InbreedingCoeff=-0.0030;MLEAC=3;MLEAF=0.000599;MQ=38.40;MQRankSum=0.272;QD=3.18;ReadPosRankSum=-0.471;SOR=0.059
chr21	8396127	7092	ITS2	C	T	840.51	SNV	AC=4;AF=0.000799;AN=5008;BaseQRankSum=0.462;ClippingRankSum=0.000;DP=119977;ExcessHet=3.0190;FS=0.000;InbreedingCoeff=-0.0009;MLEAC=4;MLEAF=0.000799;MQ=38.71;MQRankSum=0.139;QD=1.64;ReadPosRankSum=-1.548;SOR=0.029
chr21	8257292	7095	ITS2	G	C	777.22	SNV	AC=15;AF=0.00315;AN=4758;BaseQRankSum=-0.000;ClippingRankSum=-0.000;DP=16672;ExcessHet=4.7870;FS=0.000;InbreedingCoeff=-0.0457;MLEAC=17;MLEAF=0.00357;MQ=16.86;MQRankSum=-0.000;QD=6.27;ReadPosRankSum=0.549;SOR=0.572
chr21	8257294	7097	ITS2	T	G	407.04	SNV	AC=22;AF=0.00476;AN=4618;BaseQRankSum=-0.742;ClippingRankSum=-0.000;DP=16936;ExcessHet=69.8646;FS=1.673;InbreedingCoeff=-0.1518;MLEAC=19;MLEAF=0.00411;MQ=15.30;MQRankSum=-0.000;QD=2.03;ReadPosRankSum=-0.000;SOR=0.523
chr21	8396136	7101	ITS2	T	A	2652.59	SNV	AC=5;AF=0.000998;AN=5008;BaseQRankSum=-0.066;ClippingRankSum=0.000;DP=126986;ExcessHet=3.0285;FS=0.000;InbreedingCoeff=-0.0016;MLEAC=5;MLEAF=0.000998;MQ=38.93;MQRankSum=1.146;QD=4.48;ReadPosRankSum=0.854;SOR=0.093
chr21	8213091	7103	ITS2	T	C	2008.45	SNV	AC=3;AF=0.000599;AN=5008;BaseQRankSum=0.934;ClippingRankSum=0.000;DP=169372;ExcessHet=3.0129;FS=0.000;InbreedingCoeff=-0.0006;MLEAC=3;MLEAF=0.000599;MQ=38.88;MQRankSum=-1.052;QD=1.77;ReadPosRankSum=-0.504;SOR=0.030
chr21	8213092	7104	ITS2	C	T	3840.49	SNV	AC=4;AF=0.000799;AN=5008;BaseQRankSum=-0.923;ClippingRankSum=0.000;DP=170285;ExcessHet=3.0155;FS=0.000;InbreedingCoeff=-0.0008;MLEAC=4;MLEAF=0.000799;MQ=38.02;MQRankSum=-0.078;QD=2.81;ReadPosRankSum=-0.465;SOR=0.049
chr21	8257307	7110	ITS2	T	G	147.65	SNV	AC=39;AF=0.00838;AN=4654;BaseQRankSum=-1.139;ClippingRankSum=-0.000;DP=18786;ExcessHet=51.9583;FS=0.000;InbreedingCoeff=-0.1382;MLEAC=26;MLEAF=0.00559;MQ=18.82;MQRankSum=-0.000;QD=0.50;ReadPosRankSum=-0.000;SOR=0.985
chr21	8213101	7113	ITS2	T	A	6779.51	SNV	AC=7;AF=0.0014;AN=5008;BaseQRankSum=0.040;ClippingRankSum=0.000;DP=173084;ExcessHet=3.0346;FS=0.000;InbreedingCoeff=-0.0015;MLEAC=6;MLEAF=0.0012;MQ=38.73;MQRankSum=-0.885;QD=2.64;ReadPosRankSum=1.300;SOR=0.046
chr21	8396150	7115	ITS2	G	T	5174.78	SNV	AC=15;AF=0.003;AN=5008;BaseQRankSum=-2.603;ClippingRankSum=0.000;DP=129994;ExcessHet=3.1146;FS=0.000;InbreedingCoeff=-0.0031;MLEAC=14;MLEAF=0.0028;MQ=38.99;MQRankSum=0.544;QD=2.21;ReadPosRankSum=-0.281;SOR=0.040
chr21	8213115	7127	ITS2	G	T	10184.5	SNV	AC=14;AF=0.0028;AN=5008;BaseQRankSum=-4.691;ClippingRankSum=0.000;DP=177776;ExcessHet=3.1016;FS=0.000;InbreedingCoeff=-0.0029;MLEAC=14;MLEAF=0.0028;MQ=38.65;MQRankSum=-0.985;QD=1.81;ReadPosRankSum=-0.063;SOR=0.037
chr21	8257333	7136	ITS2	T	G	370.71	SNV	AC=38;AF=0.00814;AN=4670;BaseQRankSum=-0.524;ClippingRankSum=-0.000;DP=18854;ExcessHet=68.5736;FS=0.000;InbreedingCoeff=-0.1360;MLEAC=50;MLEAF=0.0107;MQ=18.39;MQRankSum=-0.000;QD=1.37;ReadPosRankSum=-0.000;SOR=2.110
chr21	8257338	7141	ITS2	T	G	490.71	SNV	AC=74;AF=0.0164;AN=4504;BaseQRankSum=-0.524;ClippingRankSum=-0.000;DP=16976;ExcessHet=72.8149;FS=2.408;InbreedingCoeff=-0.1835;MLEAC=90;MLEAF=0.02;MQ=19.03;MQRankSum=-0.000;QD=0.87;ReadPosRankSum=-0.000;SOR=1.735
chr21	8396176	7141	ITS2	C	G	383.51	SNV	AC=3;AF=0.000599;AN=5008;BaseQRankSum=0.000;ClippingRankSum=0.000;DP=133376;ExcessHet=3.0155;FS=0.000;InbreedingCoeff=-0.0007;MLEAC=3;MLEAF=0.000599;MQ=38.36;MQRankSum=0.278;QD=1.20;ReadPosRankSum=0.934;SOR=0.018
chr21	8396177	7142	ITS2	G	T	2844.83	SNV	AC=21;AF=0.00419;AN=5008;BaseQRankSum=-0.308;ClippingRankSum=0.000;DP=135572;ExcessHet=3.2114;FS=0.000;InbreedingCoeff=-0.0043;MLEAC=20;MLEAF=0.00399;MQ=38.60;MQRankSum=0.129;QD=1.03;ReadPosRankSum=-0.178;SOR=0.022
chr21	8213131	7143	ITS2	CCGTCGT	C,CCGT	8782.77	INDEL	AC=1,6;AF=0.0002,0.0012;AN=5008;BaseQRankSum=0.845;ClippingRankSum=0.000;DP=178814;ExcessHet=3.0285;FS=0.000;InbreedingCoeff=-0.0014;MLEAC=1,6;MLEAF=0.0002,0.0012;MQ=38.76;MQRankSum=3.153;QD=2.94;ReadPosRankSum=-0.053;SOR=0.038
chr21	8257341	7144	ITS2	C	CCGT,CCGTCGT	3889.62	INDEL	AC=52,6;AF=0.011,0.00127;AN=4732;BaseQRankSum=-0.000;ClippingRankSum=-0.000;DP=18968;ExcessHet=0.0000;FS=0.000;InbreedingCoeff=0.0665;MLEAC=51,5;MLEAF=0.0108,0.00106;MQ=18.43;MQRankSum=-1.645;QD=13.51;ReadPosRankSum=0.319;SOR=0.622
chr21	8213133	7145	ITS2	G	T,*	8999.82	SNV	AC=1,7;AF=0.0002,0.0014;AN=5008;BaseQRankSum=0.814;ClippingRankSum=0.000;DP=179446;ExcessHet=3.0346;FS=0.000;InbreedingCoeff=-0.0016;MLEAC=1,7;MLEAF=0.0002,0.0014;MQ=8.78;MQRankSum=-0.678;QD=2.83;ReadPosRankSum=0.209;SOR=0.037
chr21	8213134	7146	ITS2	T	A,*	9057.87	SNV	AC=1,7;AF=0.0002,0.0014;AN=5008;BaseQRankSum=-0.747;ClippingRankSum=0.000;DP=180653;ExcessHet=3.0346;FS=0.000;InbreedingCoeff=-0.0015;MLEAC=1,7;MLEAF=0.0002,0.0014;MQ=11.44;MQRankSum=0.480;QD=2.72;ReadPosRankSum=0.194;SOR=0.036
chr21	8396181	7146	ITS2	T	C	6000.45	SNV	AC=10;AF=0.002;AN=5008;BaseQRankSum=0.557;ClippingRankSum=0.000;DP=137645;ExcessHet=3.0676;FS=0.000;InbreedingCoeff=-0.0021;MLEAC=7;MLEAF=0.0014;MQ=38.31;MQRankSum=0.559;QD=3.67;ReadPosRankSum=-0.004;SOR=0.038
chr21	8213141	7153	ITS2	C	G	4061.52	SNV	AC=4;AF=0.000799;AN=5008;BaseQRankSum=1.108;ClippingRankSum=0.000;DP=179871;ExcessHet=3.0190;FS=0.000;InbreedingCoeff=-0.0009;MLEAC=3;MLEAF=0.000599;MQ=38.48;MQRankSum=0.289;QD=3.52;ReadPosRankSum=0.509;SOR=0.056
chr21	8213142	7154	ITS2	G	T	6761.61	SNV	AC=17;AF=0.00339;AN=5008;BaseQRankSum=-1.346;ClippingRankSum=0.000;DP=185605;ExcessHet=3.1286;FS=0.000;InbreedingCoeff=-0.0034;MLEAC=16;MLEAF=0.00319;MQ=38.39;MQRankSum=-0.051;QD=1.20;ReadPosRankSum=0.240;SOR=0.020
chr21	8213146	7158	ITS2	T	C	15325.6	SNV	AC=12;AF=0.0024;AN=5008;BaseQRankSum=1.448;ClippingRankSum=0.000;DP=188402;ExcessHet=3.0677;FS=0.000;InbreedingCoeff=-0.0024;MLEAC=12;MLEAF=0.0024;MQ=38.53;MQRankSum=-0.182;QD=3.33;ReadPosRankSum=0.905;SOR=0.174
chr21	8396198	7163	ITS2	T	TG	5081.96	SNV	AC=12;AF=0.0024;AN=5008;BaseQRankSum=-1.766;ClippingRankSum=0.000;DP=146814;ExcessHet=3.5553;FS=0.000;InbreedingCoeff=-0.0055;MLEAC=11;MLEAF=0.0022;MQ=38.54;MQRankSum=0.622;QD=2.20;ReadPosRankSum=-1.081;SOR=0.019
chr21	8396206	7171	ITS2	T	C	711.64	SNV	AC=3;AF=0.000599;AN=5008;BaseQRankSum=-2.297;ClippingRankSum=0.000;DP=144206;ExcessHet=3.1012;FS=0.000;InbreedingCoeff=-0.0020;MLEAC=3;MLEAF=0.000599;MQ=38.43;MQRankSum=0.502;QD=2.60;ReadPosRankSum=-0.579;SOR=0.008
chr21	8213163	7175	ITS2	T	G,TG	11077.1	SNV	AC=1,11;AF=0.0002,0.0022;AN=5008;BaseQRankSum=-0.917;ClippingRankSum=0.000;DP=196518;ExcessHet=3.0679;FS=0.000;InbreedingCoeff=-0.0017;MLEAC=1,11;MLEAF=0.0002,0.0022;MQ=38.72;MQRankSum=0.138;QD=1.98;ReadPosRankSum=-0.232;SOR=0.608
chr21	8257375	7178	ITS2	G	C	1131.9	SNV	AC=39;AF=0.00806;AN=4836;BaseQRankSum=-0.000;ClippingRankSum=-0.000;DP=19160;ExcessHet=0.0126;FS=3.678;InbreedingCoeff=-0.0122;MLEAC=34;MLEAF=0.00703;MQ=21.62;MQRankSum=-0.000;QD=3.84;ReadPosRankSum=0.431;SOR=1.688
chr21	8213171	7183	ITS2	T	C	742.57	SNV	AC=3;AF=0.000599;AN=5008;BaseQRankSum=1.004;ClippingRankSum=0.000;DP=194160;ExcessHet=3.0155;FS=0.000;InbreedingCoeff=-0.0007;MLEAC=3;MLEAF=0.000599;MQ=38.58;MQRankSum=-1.587;QD=1.03;ReadPosRankSum=-0.409;SOR=0.473
chr21	8396218	7183	ITS2	TGTG	T,TGTGGTG	657.46	INDEL	AC=2,1;AF=0.000399,0.0002;AN=5008;BaseQRankSum=-2.255;ClippingRankSum=0.000;DP=170573;ExcessHet=3.0131;FS=0.000;InbreedingCoeff=0.0125;MLEAC=2,1;MLEAF=0.000399,0.0002;MQ=38.41;MQRankSum=0.690;QD=1.61;ReadPosRankSum=-1.141;SOR=0.011
chr21	8396219	7184	ITS2	G	GT,*	805211	SNV	AC=1110,1;AF=0.222,0.0002;AN=5008;BaseQRankSum=-0.128;ClippingRankSum=0.000;DP=232168;ExcessHet=706.7575;FS=0.000;InbreedingCoeff=-0.2845;MLEAC=1109,1;MLEAF=0.221,0.0002;MQ=38.53;MQRankSum=0.091;QD=5.48;ReadPosRankSum=0.267;SOR=0.094
chr21	8257384	7187	ITS2	T	C	536.13	SNV	AC=4;AF=0.000831;AN=4812;BaseQRankSum=-0.000;ClippingRankSum=-0.000;DP=18889;ExcessHet=4.8738;FS=5.784;InbreedingCoeff=-0.0450;MLEAC=4;MLEAF=0.000831;MQ=19.94;MQRankSum=0.489;QD=10.12;ReadPosRankSum=0.272;SOR=0.102
chr21	8396224	7189	ITS2	G	C	468.55	SNV	AC=4;AF=0.000799;AN=5008;BaseQRankSum=-0.911;ClippingRankSum=0.000;DP=178373;ExcessHet=3.0155;FS=0.000;InbreedingCoeff=-0.0008;MLEAC=4;MLEAF=0.000799;MQ=35.02;MQRankSum=0.829;QD=0.67;ReadPosRankSum=-0.346;SOR=0.032
chr21	8396226	7191	ITS2	T	TG	4943.95	SNV	AC=17;AF=0.00339;AN=5008;BaseQRankSum=-0.601;ClippingRankSum=0.000;DP=178866;ExcessHet=3.2501;FS=0.000;InbreedingCoeff=-0.0041;MLEAC=17;MLEAF=0.00339;MQ=37.83;MQRankSum=0.227;QD=2.18;ReadPosRankSum=-0.161;SOR=0.022
chr21	8213183	7195	ITS2	TGTG	T,TGTGGTG	4610.57	INDEL	AC=2,1;AF=0.000399,0.0002;AN=5008;BaseQRankSum=-2.018;ClippingRankSum=0.000;DP=223688;ExcessHet=3.0130;FS=0.000;InbreedingCoeff=0.0043;MLEAC=2,1;MLEAF=0.000399,0.0002;MQ=38.68;MQRankSum=1.183;QD=4.90;ReadPosRankSum=-0.949;SOR=0.997
chr21	8213184	7196	ITS2	G	GT,*	1.46386e+06	SNV	AC=1096,1;AF=0.219,0.0002;AN=5008;BaseQRankSum=-0.356;ClippingRankSum=0.000;DP=430199;ExcessHet=681.2898;FS=1.203;InbreedingCoeff=-0.2807;MLEAC=1095,1;MLEAF=0.219,0.0002;MQ=38.51;MQRankSum=-0.383;QD=4.96;ReadPosRankSum=0.329;SOR=0.507
chr21	8213185	7197	ITS2	T	C,G,*	5030.95	SNV	AC=1,1,1;AF=0.000204,0.000204,0.000204;AN=4890;BaseQRankSum=-0.923;ClippingRankSum=0.000;DP=478460;ExcessHet=3.0155;FS=0.000;InbreedingCoeff=0.1759;MLEAC=1,1,1;MLEAF=0.000204,0.000204,0.000204;MQ=6.36;MQRankSum=1.119;QD=5.09;ReadPosRankSum=0.951;SOR=0.544
chr21	8257395	7198	ITS2	G	C	4721.38	SNV	AC=102;AF=0.0214;AN=4774;BaseQRankSum=0.000;ClippingRankSum=0.000;DP=18622;ExcessHet=2.1499;FS=2.579;InbreedingCoeff=-0.0498;MLEAC=100;MLEAF=0.0209;MQ=21.28;MQRankSum=-0.000;QD=4.86;ReadPosRankSum=-0.000;SOR=1.160
chr21	8257396	7199	ITS2	T	TGTG	534.87	INDEL	AC=4;AF=0.000846;AN=4728;BaseQRankSum=-1.221;ClippingRankSum=-0.000;DP=18706;ExcessHet=9.5023;FS=3.701;InbreedingCoeff=-0.0658;MLEAC=4;MLEAF=0.000846;MQ=17.83;MQRankSum=-0.000;QD=10.09;ReadPosRankSum=0.000;SOR=0.093
chr21	8257397	7200	ITS2	G	GT	714.03	SNV	AC=15;AF=0.00314;AN=4780;BaseQRankSum=-0.000;ClippingRankSum=-0.000;DP=19012;ExcessHet=0.0846;FS=38.242;InbreedingCoeff=-0.0245;MLEAC=13;MLEAF=0.00272;MQ=15.19;MQRankSum=-0.000;QD=8.21;ReadPosRankSum=-0.842;SOR=0.002
chr21	8396235	7200	ITS2	A	G	941.63	SNV	AC=4;AF=0.000799;AN=5008;BaseQRankSum=0.466;ClippingRankSum=0.000;DP=175895;ExcessHet=3.0285;FS=0.000;InbreedingCoeff=-0.0012;MLEAC=4;MLEAF=0.000799;MQ=36.93;MQRankSum=0.469;QD=2.18;ReadPosRankSum=-0.306;SOR=0.009
chr21	8213189	7201	ITS2	G	C	1221.47	SNV	AC=3;AF=0.000599;AN=5008;BaseQRankSum=-0.318;ClippingRankSum=0.000;DP=373128;ExcessHet=3.0155;FS=0.000;InbreedingCoeff=-0.0007;MLEAC=3;MLEAF=0.000599;MQ=28.40;MQRankSum=-0.042;QD=1.55;ReadPosRankSum=-0.531;SOR=0.587
chr21	8257398	7201	ITS2	T	C,TG	307.36	SNV	AC=5,1;AF=0.00106,0.000212;AN=4728;BaseQRankSum=-1.036;ClippingRankSum=-0.000;DP=18876;ExcessHet=3.0279;FS=0.000;InbreedingCoeff=0.0534;MLEAC=4,1;MLEAF=0.000846,0.000212;MQ=16.96;MQRankSum=-0.000;QD=6.15;ReadPosRankSum=-0.000;SOR=0.244
chr21	8213191	7203	ITS2	T	TG,TGGG	7063.63	SNV	AC=12,1;AF=0.0024,0.0002;AN=5008;BaseQRankSum=0.685;ClippingRankSum=0.000;DP=382191;ExcessHet=3.0798;FS=1.281;InbreedingCoeff=0.0015;MLEAC=12,1;MLEAF=0.0024,0.0002;MQ=36.42;MQRankSum=0.216;QD=2.40;ReadPosRankSum=0.078;SOR=0.847
chr21	8257404	7207	ITS2	T	TG	21144.7	SNV	AC=320;AF=0.0688;AN=4654;BaseQRankSum=-0.000;ClippingRankSum=-0.000;DP=18106;ExcessHet=14.5746;FS=1.829;InbreedingCoeff=-0.1106;MLEAC=355;MLEAF=0.0763;MQ=20.97;MQRankSum=-0.000;QD=8.63;ReadPosRankSum=0.108;SOR=1.590
chr21	8396242	7207	ITS2	C	T,A	1553.87	SNV	AC=5,2;AF=0.000998,0.000399;AN=5008;BaseQRankSum=0.000;ClippingRankSum=0.000;DP=173980;ExcessHet=3.0285;FS=0.000;InbreedingCoeff=-0.0014;MLEAC=5,2;MLEAF=0.000998,0.000399;MQ=36.24;MQRankSum=0.374;QD=1.88;ReadPosRankSum=1.291;SOR=0.021
chr21	8213200	7212	ITS2	A	G	1814.51	SNV	AC=5;AF=0.000998;AN=5008;BaseQRankSum=1.964;ClippingRankSum=0.000;DP=373171;ExcessHet=3.0190;FS=12.951;InbreedingCoeff=-0.0011;MLEAC=5;MLEAF=0.000998;MQ=38.42;MQRankSum=0.734;QD=1.52;ReadPosRankSum=1.122;SOR=4.056
chr21	8257413	7216	ITS2	A	G	206.73	SNV	AC=10;AF=0.00212;AN=4714;BaseQRankSum=0.319;ClippingRankSum=0.000;DP=18727;ExcessHet=3.2919;FS=7.616;InbreedingCoeff=-0.0597;MLEAC=9;MLEAF=0.00191;MQ=15.58;MQRankSum=0.079;QD=2.87;ReadPosRankSum=-0.514;SOR=0.077
chr21	8396252	7217	ITS2	A	G,AG	1797.55	SNV	AC=10,3;AF=0.002,0.000599;AN=5008;BaseQRankSum=-2.284;ClippingRankSum=0.000;DP=172791;ExcessHet=3.0782;FS=0.000;InbreedingCoeff=-0.0021;MLEAC=9,3;MLEAF=0.0018,0.000599;MQ=38.00;MQRankSum=0.660;QD=1.12;ReadPosRankSum=-0.404;SOR=0.009
chr21	8213207	7219	ITS2	C	T,A	1384.51	SNV	AC=2,1;AF=0.000399,0.0002;AN=5008;BaseQRankSum=-0.142;ClippingRankSum=0.000;DP=373168;ExcessHet=3.0129;FS=0.000;InbreedingCoeff=-0.0003;MLEAC=2,1;MLEAF=0.000399,0.0002;MQ=38.57;MQRankSum=0.123;QD=1.84;ReadPosRankSum=-0.757;SOR=0.716
chr21	8396257	7222	ITS2	A	C,T	417335	SNV	AC=882,11;AF=0.176,0.0022;AN=5008;BaseQRankSum=0.684;ClippingRankSum=0.000;DP=183196;ExcessHet=436.0572;FS=0.000;InbreedingCoeff=-0.2169;MLEAC=883,10;MLEAF=0.176,0.002;MQ=38.35;MQRankSum=0.039;QD=4.93;ReadPosRankSum=-0.011;SOR=0.073
chr21	8396263	7228	ITS2	G	A	1628.61	SNV	AC=7;AF=0.0014;AN=5008;BaseQRankSum=-2.100;ClippingRankSum=0.000;DP=136644;ExcessHet=3.0285;FS=0.000;InbreedingCoeff=-0.0014;MLEAC=6;MLEAF=0.0012;MQ=38.41;MQRankSum=-0.113;QD=2.84;ReadPosRankSum=0.698;SOR=0.048
chr21	8213217	7229	ITS2	A	G,AG	1126.87	SNV	AC=3,2;AF=0.000599,0.000399;AN=5008;BaseQRankSum=1.152;ClippingRankSum=0.000;DP=373825;ExcessHet=3.0190;FS=5.832;InbreedingCoeff=-0.0002;MLEAC=3,2;MLEAF=0.000599,0.000399;MQ=38.54;MQRankSum=-0.211;QD=1.29;ReadPosRankSum=-0.573;SOR=1.727
chr21	8213222	7234	ITS2	A	C,T	626814	SNV	AC=780,11;AF=0.156,0.0022;AN=5008;BaseQRankSum=0.652;ClippingRankSum=0.000;DP=409957;ExcessHet=334.9510;FS=1.621;InbreedingCoeff=-0.1874;MLEAC=784,11;MLEAF=0.157,0.0022;MQ=38.73;MQRankSum=-0.386;QD=4.19;ReadPosRankSum=0.236;SOR=0.929
chr21	8257435	7238	ITS2	A	C	14541.3	SNV	AC=315;AF=0.188;AN=1678;BaseQRankSum=-0.000;ClippingRankSum=-0.000;DP=3956;ExcessHet=0.0008;FS=1.837;InbreedingCoeff=-0.1385;MLEAC=442;MLEAF=0.263;MQ=20.40;MQRankSum=-0.000;QD=11.38;ReadPosRankSum=-0.000;SOR=1.451
chr21	8213228	7240	ITS2	G	A	1439.49	SNV	AC=4;AF=0.000799;AN=5008;BaseQRankSum=-0.639;ClippingRankSum=0.000;DP=397900;ExcessHet=3.0155;FS=0.807;InbreedingCoeff=-0.0008;MLEAC=4;MLEAF=0.000799;MQ=39.07;MQRankSum=-1.173;QD=1.80;ReadPosRankSum=0.982;SOR=0.808
chr21	8213233	7245	ITS2	C	CGG,T	819.18	INDEL	AC=2,1;AF=0.000399,0.0002;AN=5008;BaseQRankSum=0.470;ClippingRankSum=0.000;DP=411115;ExcessHet=3.0137;FS=14.867;InbreedingCoeff=0.0368;MLEAC=2,1;MLEAF=0.000399,0.0002;MQ=39.14;MQRankSum=-0.317;QD=1.22;ReadPosRankSum=0.121;SOR=2.325
chr21	8396303	7268	ITS2	C	T	1489.97	SNV	AC=25;AF=0.0483;AN=518;BaseQRankSum=-0.000;ClippingRankSum=0.000;DP=3346;ExcessHet=6.8485;FS=0.000;InbreedingCoeff=-0.2436;MLEAC=45;MLEAF=0.0869;MQ=27.00;MQRankSum=0.101;QD=2.60;ReadPosRankSum=0.156;SOR=0.056
chr21	8213257	7269	ITS2	C	CG,T	917.3	SNV	AC=3,2;AF=0.000599,0.000399;AN=5008;BaseQRankSum=0.528;ClippingRankSum=0.000;DP=385472;ExcessHet=3.0202;FS=0.000;InbreedingCoeff=0.0196;MLEAC=3,1;MLEAF=0.000599,0.0002;MQ=38.88;MQRankSum=0.984;QD=2.57;ReadPosRankSum=-0.316;SOR=0.706
chr21	8396306	7271	ITS2	CGGTTCG	C	351.81	INDEL	AC=3;AF=0.00641;AN=468;BaseQRankSum=0.000;ClippingRankSum=0.000;DP=2196;ExcessHet=3.2054;FS=0.000;InbreedingCoeff=-0.2004;MLEAC=5;MLEAF=0.0107;MQ=19.66;MQRankSum=-0.756;QD=6.17;ReadPosRankSum=0.750;SOR=0.110
chr21	8213268	7280	ITS2	C	T	4201.95	SNV	AC=31;AF=0.00619;AN=5008;BaseQRankSum=0.295;ClippingRankSum=0.000;DP=367875;ExcessHet=40.4121;FS=0.955;InbreedingCoeff=-0.0352;MLEAC=29;MLEAF=0.00579;MQ=37.54;MQRankSum=0.047;QD=1.89;ReadPosRankSum=0.792;SOR=0.975
chr21	8213284	7296	ITS2	G	GC,*	1087.56	SNV	AC=3,1;AF=0.000599,0.0002;AN=5008;BaseQRankSum=0.000;ClippingRankSum=0.000;DP=369325;ExcessHet=3.0165;FS=0.000;InbreedingCoeff=0.0255;MLEAC=3,1;MLEAF=0.000599,0.0002;MQ=26.38;MQRankSum=-0.782;QD=1.63;ReadPosRankSum=-0.868;SOR=0.349
chr21	8213285	7297	ITS2	C	T,A,*	1958.06	SNV	AC=6,1,1;AF=0.0012,0.0002,0.0002;AN=5008;BaseQRankSum=0.000;ClippingRankSum=0.000;DP=366257;ExcessHet=3.0351;FS=2.210;InbreedingCoeff=0.0061;MLEAC=5,1,1;MLEAF=0.000998,0.0002,0.0002;MQ=32.31;MQRankSum=-0.462;QD=1.92;ReadPosRankSum=0.375;SOR=0.863
chr21	8213287	7299	ITS2	C	G,*	1694.47	SNV	AC=2,1;AF=0.000399,0.0002;AN=5008;BaseQRankSum=-0.820;ClippingRankSum=0.000;DP=364787;ExcessHet=3.0129;FS=1.869;InbreedingCoeff=-0.0005;MLEAC=2,1;MLEAF=0.000399,0.0002;MQ=31.21;MQRankSum=2.404;QD=1.74;ReadPosRankSum=0.559;SOR=0.324
chr21	8213320	7332	ITS2	C	G	2367.33	SNV	AC=22;AF=0.00445;AN=4948;BaseQRankSum=0.000;ClippingRankSum=0.000;DP=381167;ExcessHet=62.2921;FS=0.000;InbreedingCoeff=-0.0407;MLEAC=18;MLEAF=0.00364;MQ=25.28;MQRankSum=0.601;QD=2.13;ReadPosRankSum=-0.292;SOR=1.564
chr21	8213325	7337	ITS2	GCGCCCCTCCTCCTCCCCCGC	G,GCCGCCCCTCCTCCTCCCCCGC	10382.5	INDEL	AC=6,2;AF=0.0012,0.000399;AN=5008;BaseQRankSum=0.938;ClippingRankSum=0.000;DP=371494;ExcessHet=3.0369;FS=6.744;InbreedingCoeff=0.0134;MLEAC=6,2;MLEAF=0.0012,0.000399;MQ=41.72;MQRankSum=-0.315;QD=6.58;ReadPosRankSum=1.372;SOR=6.257
chr21	8213326	7338	ITS2	C	T,*	11442.5	SNV	AC=9,6;AF=0.0018,0.0012;AN=5006;BaseQRankSum=0.230;ClippingRankSum=0.000;DP=374252;ExcessHet=3.1418;FS=2.178;InbreedingCoeff=0.0449;MLEAC=8,7;MLEAF=0.0016,0.0014;MQ=21.34;MQRankSum=0.072;QD=6.74;ReadPosRankSum=0.104;SOR=5.961
chr21	8213327	7339	ITS2	G	T,*	10399.2	SNV	AC=1,6;AF=0.0002,0.0012;AN=5006;BaseQRankSum=0.000;ClippingRankSum=0.000;DP=376460;ExcessHet=3.0405;FS=6.780;InbreedingCoeff=0.0598;MLEAC=1,7;MLEAF=0.0002,0.0014;MQ=5.55;MQRankSum=-2.202;QD=7.24;ReadPosRankSum=1.240;SOR=6.085
chr21	8213329	7341	ITS2	C	CCCT,G,*	10707.7	SNV	AC=1,1,6;AF=0.0002,0.0002,0.0012;AN=5008;BaseQRankSum=0.000;ClippingRankSum=0.000;DP=378491;ExcessHet=3.0346;FS=4.498;InbreedingCoeff=-0.0005;MLEAC=1,1,6;MLEAF=0.0002,0.0002,0.0012;MQ=21.40;MQRankSum=-1.465;QD=5.76;ReadPosRankSum=-0.097;SOR=4.709
chr21	8213332	7344	ITS2	T	C,A,*	13497.8	SNV	AC=5,6,8;AF=0.00105,0.00125,0.00167;AN=4782;BaseQRankSum=-3.515;ClippingRankSum=0.000;DP=377203;ExcessHet=3.3832;FS=4.354;InbreedingCoeff=0.2061;MLEAC=4,5,9;MLEAF=0.000836,0.00105,0.00188;MQ=11.47;MQRankSum=-0.809;QD=8.09;ReadPosRankSum=0.829;SOR=6.754
chr21	8213333	7345	ITS2	C	T,*	10397.6	SNV	AC=1,6;AF=0.000208,0.00125;AN=4814;BaseQRankSum=-2.149;ClippingRankSum=0.000;DP=380833;ExcessHet=3.0307;FS=6.774;InbreedingCoeff=0.0145;MLEAC=1,6;MLEAF=0.000208,0.00125;MQ=3.65;MQRankSum=1.085;QD=7.05;ReadPosRankSum=3.439;SOR=6.051
chr21	8213334	7346	ITS2	CT	C,*	11021.2	SNV	AC=9,6;AF=0.00189,0.00126;AN=4754;BaseQRankSum=0.000;ClippingRankSum=0.000;DP=379744;ExcessHet=3.1127;FS=4.490;InbreedingCoeff=0.0092;MLEAC=9,6;MLEAF=0.00189,0.00126;MQ=9.32;MQRankSum=-0.505;QD=6.52;ReadPosRankSum=0.675;SOR=6.376
chr21	8213335	7347	ITS2	TCCTC	T,ACCTC,*	34914.8	INDEL	AC=32,11,15;AF=0.00716,0.00246,0.00336;AN=4470;BaseQRankSum=-2.270;ClippingRankSum=0.000;DP=388445;ExcessHet=7.2228;FS=4.537;InbreedingCoeff=0.2025;MLEAC=34,9,16;MLEAF=0.00761,0.00201,0.00358;MQ=15.63;MQRankSum=-0.488;QD=8.14;ReadPosRankSum=1.248;SOR=4.174
chr21	8213337	7349	ITS2	CT	C,*	56590.8	SNV	AC=176,30;AF=0.0413,0.00704;AN=4264;BaseQRankSum=-0.881;ClippingRankSum=0.000;DP=388174;ExcessHet=33.3934;FS=4.705;InbreedingCoeff=-0.0160;MLEAC=187,31;MLEAF=0.0439,0.00727;MQ=20.88;MQRankSum=-3.186;QD=5.46;ReadPosRankSum=0.999;SOR=4.133
chr21	8213338	7350	ITS2	TC	CC,T,*	811495	SNV	AC=10,1339,183;AF=0.00235,0.315,0.043;AN=4254;BaseQRankSum=-1.052;ClippingRankSum=0.000;DP=432142;ExcessHet=226.9535;FS=7.192;InbreedingCoeff=-0.0336;MLEAC=10,1422,190;MLEAF=0.00235,0.334,0.0447;MQ=38.04;MQRankSum=-6.121;QD=6.51;ReadPosRankSum=-6.053;SOR=0.174
chr21	8213339	7351	ITS2	C	CCCCGCCGCCCCTCCTCCT,CCT,CCCCGCCGCCCCTCCT,CCTCCT,*	778367	SNV	AC=10,3,1,1,1338;AF=0.00246,0.000737,0.000246,0.000246,0.329;AN=4068;BaseQRankSum=0.674;ClippingRankSum=0.000;DP=373699;ExcessHet=0.5292;FS=7.236;InbreedingCoeff=0.1561;MLEAC=10,3,1,1,1385;MLEAF=0.00246,0.000737,0.000246,0.000246,0.34;MQ=3.30;MQRankSum=-2.625;QD=6.62;ReadPosRankSum=-1.538;SOR=0.166
chr21	8213340	7352	ITS2	CCCCG	C,*	14163.5	INDEL	AC=2,9;AF=0.000477,0.00215;AN=4190;BaseQRankSum=0.933;ClippingRankSum=0.000;DP=388415;ExcessHet=0.0524;FS=11.471;InbreedingCoeff=0.0743;MLEAC=2,11;MLEAF=0.000477,0.00263;MQ=4.96;MQRankSum=-0.258;QD=8.36;ReadPosRankSum=3.303;SOR=0.126
chr21	8213344	7356	ITS2	GCCGCCCCTCCTCCGAGGCC	G,*	12987	INDEL	AC=1,8;AF=0.0002,0.0016;AN=5008;BaseQRankSum=-2.177;ClippingRankSum=0.000;DP=386529;ExcessHet=3.0567;FS=2.238;InbreedingCoeff=0.0496;MLEAC=1,8;MLEAF=0.0002,0.0016;MQ=26.03;MQRankSum=-1.113;QD=7.36;ReadPosRankSum=1.332;SOR=4.550
chr21	8213345	7357	ITS2	C	T,*	11568.3	SNV	AC=1,7;AF=0.0002,0.0014;AN=5008;BaseQRankSum=0.655;ClippingRankSum=0.000;DP=381916;ExcessHet=3.0348;FS=4.778;InbreedingCoeff=-0.0004;MLEAC=1,7;MLEAF=0.0002,0.0014;MQ=7.02;MQRankSum=4.028;QD=7.95;ReadPosRankSum=3.559;SOR=5.529
chr21	8213348	7360	ITS2	C	T,*	4993.56	SNV	AC=3,2;AF=0.000599,0.000399;AN=5008;BaseQRankSum=-1.719;ClippingRankSum=0.000;DP=381872;ExcessHet=3.0190;FS=4.705;InbreedingCoeff=-0.0008;MLEAC=3,2;MLEAF=0.000599,0.000399;MQ=28.42;MQRankSum=4.244;QD=5.15;ReadPosRankSum=6.027;SOR=1.216
chr21	8213350	7362	ITS2	C	A,T,*	5579.49	SNV	AC=1,1,2;AF=0.0002,0.0002,0.000399;AN=5008;BaseQRankSum=-0.638;ClippingRankSum=0.000;DP=381903;ExcessHet=3.0155;FS=0.000;InbreedingCoeff=-0.0008;MLEAC=1,1,2;MLEAF=0.0002,0.0002,0.000399;MQ=26.50;MQRankSum=8.874;QD=6.69;ReadPosRankSum=9.897;SOR=0.444
chr21	8213351	7363	ITS2	C	G,*	12421.8	SNV	AC=6,2;AF=0.0012,0.000399;AN=5008;BaseQRankSum=0.000;ClippingRankSum=0.000;DP=381736;ExcessHet=3.0346;FS=9.593;InbreedingCoeff=-0.0016;MLEAC=6,2;MLEAF=0.0012,0.000399;MQ=31.73;MQRankSum=1.771;QD=8.47;ReadPosRankSum=5.874;SOR=3.839
chr21	8213354	7366	ITS2	C	T,*	2103.45	SNV	AC=1,2;AF=0.0002,0.000399;AN=5008;BaseQRankSum=-0.313;ClippingRankSum=0.000;DP=385522;ExcessHet=3.0129;FS=4.579;InbreedingCoeff=-0.0006;MLEAC=1,2;MLEAF=0.0002,0.000399;MQ=16.76;MQRankSum=5.996;QD=3.47;ReadPosRankSum=5.226;SOR=2.423
chr21	8396403	7368	ITS2	T	C	761.93	SNV	AC=22;AF=0.733;AN=30;DP=3483;ExcessHet=0.0005;FS=0.000;InbreedingCoeff=0.4901;MLEAC=25;MLEAF=0.833;MQ=2.66;QD=27.21;SOR=2.147
chr21	8213358	7370	ITS2	G	T,*	12807.8	SNV	AC=6,2;AF=0.0012,0.000399;AN=5008;BaseQRankSum=-0.211;ClippingRankSum=0.000;DP=386065;ExcessHet=3.0346;FS=9.384;InbreedingCoeff=-0.0016;MLEAC=6,2;MLEAF=0.0012,0.000399;MQ=32.44;MQRankSum=1.493;QD=7.83;ReadPosRankSum=6.069;SOR=3.453
chr21	8396405	7370	ITS2	T	C	153.19	SNV	AC=6;AF=0.00482;AN=1244;DP=4642;ExcessHet=0.1419;FS=0.000;InbreedingCoeff=-0.0895;MLEAC=4;MLEAF=0.00322;MQ=4.04;QD=21.88;SOR=0.693
chr21	8213359	7371	ITS2	A	C,*	12320.8	SNV	AC=6,1;AF=0.0012,0.0002;AN=5008;BaseQRankSum=0.859;ClippingRankSum=0.000;DP=386191;ExcessHet=3.0285;FS=6.699;InbreedingCoeff=-0.0013;MLEAC=6,1;MLEAF=0.0012,0.0002;MQ=34.83;MQRankSum=0.987;QD=7.97;ReadPosRankSum=5.502;SOR=2.444
chr21	8213360	7372	ITS2	G	A,GCCC,*	12610.8	INDEL	AC=1,6,1;AF=0.0002,0.0012,0.0002;AN=5008;BaseQRankSum=0.804;ClippingRankSum=0.000;DP=386538;ExcessHet=3.0346;FS=6.927;InbreedingCoeff=-0.0016;MLEAC=1,6,1;MLEAF=0.0002,0.0012,0.0002;MQ=34.77;MQRankSum=0.896;QD=7.73;ReadPosRankSum=5.465;SOR=2.943
chr21	8213361	7373	ITS2	G	GC,GCC,*	26317.8	SNV	AC=74,3,1;AF=0.0148,0.000599,0.0002;AN=5008;BaseQRankSum=0.302;ClippingRankSum=0.000;DP=389127;ExcessHet=5.6783;FS=2.210;InbreedingCoeff=-0.0128;MLEAC=70,3,1;MLEAF=0.014,0.000599,0.0002;MQ=39.33;MQRankSum=-0.809;QD=2.48;ReadPosRankSum=-0.346;SOR=1.136
chr21	8213365	7377	ITS2	CG	C	1410.68	SNV	AC=5;AF=0.000998;AN=5008;BaseQRankSum=0.833;ClippingRankSum=0.000;DP=397324;ExcessHet=3.0233;FS=0.000;InbreedingCoeff=-0.0011;MLEAC=4;MLEAF=0.000799;MQ=38.15;MQRankSum=0.000;QD=3.07;ReadPosRankSum=0.954;SOR=1.189
chr21	8213366	7378	ITS2	G	C,*	199107	SNV	AC=378,4;AF=0.0755,0.000799;AN=5008;BaseQRankSum=0.204;ClippingRankSum=0.000;DP=414324;ExcessHet=73.0684;FS=0.000;InbreedingCoeff=-0.0792;MLEAC=371,3;MLEAF=0.0741,0.000599;MQ=40.88;MQRankSum=-1.374;QD=2.45;ReadPosRankSum=-0.967;SOR=1.161
chr21	8396427	7392	ITS2	T	G	36.21	SNV	AC=4;AF=0.00177;AN=2254;BaseQRankSum=-1.822;ClippingRankSum=0.000;DP=12954;ExcessHet=0.9850;FS=44.088;InbreedingCoeff=-0.0798;MLEAC=1;MLEAF=0.000444;MQ=23.68;MQRankSum=0.459;QD=1.34;ReadPosRankSum=0.160;SOR=5.319
chr21	8396428	7393	ITS2	A	G	1416.65	SNV	AC=20;AF=0.0088;AN=2274;BaseQRankSum=0.366;ClippingRankSum=-0.000;DP=13467;ExcessHet=0.0000;FS=34.249;InbreedingCoeff=-0.0157;MLEAC=16;MLEAF=0.00704;MQ=23.84;MQRankSum=-1.900;QD=15.74;ReadPosRankSum=0.253;SOR=2.282
chr21	8213385	7397	ITS2	C	G	17687.8	SNV	AC=7;AF=0.0014;AN=5008;BaseQRankSum=-0.430;ClippingRankSum=0.000;DP=409940;ExcessHet=3.0285;FS=6.215;InbreedingCoeff=-0.0014;MLEAC=7;MLEAF=0.0014;MQ=42.31;MQRankSum=8.746;QD=5.49;ReadPosRankSum=2.925;SOR=0.239
chr21	8396433	7398	ITS2	CGCCCGCCCGCCCGGCTCGCCTCGCGGCGCGTCGGCCGGGGCCGGGA	C	3445.75	INDEL	AC=7;AF=0.00246;AN=2848;BaseQRankSum=-0.505;ClippingRankSum=0.000;DP=14476;ExcessHet=3.1321;FS=9.917;InbreedingCoeff=-0.0789;MLEAC=9;MLEAF=0.00316;MQ=33.15;MQRankSum=0.994;QD=4.78;ReadPosRankSum=-2.302;SOR=1.648
chr21	8396436	7401	ITS2	C	G,A,*	20541.2	SNV	AC=202,2,6;AF=0.0723,0.000716,0.00215;AN=2792;BaseQRankSum=-0.000;ClippingRankSum=-0.000;DP=14697;ExcessHet=0.0000;FS=0.000;InbreedingCoeff=0.4289;MLEAC=169,1,6;MLEAF=0.0605,0.000358,0.00215;MQ=20.47;MQRankSum=-1.465;QD=12.10;ReadPosRankSum=0.366;SOR=0.647
chr21	8213393	7405	ITS2	TAC	T,TACGCGCGCGCGCCCGCCCGCAC	1277.86	INDEL	AC=4,2;AF=0.000799,0.000399;AN=5008;BaseQRankSum=-1.384;ClippingRankSum=0.000;DP=409795;ExcessHet=3.0233;FS=1.886;InbreedingCoeff=-0.0011;MLEAC=3,2;MLEAF=0.000599,0.000399;MQ=39.73;MQRankSum=-1.121;QD=1.10;ReadPosRankSum=0.731;SOR=0.295
chr21	8213394	7406	ITS2	ACGCG	ACG,GCGCG,ACGCGCGCGCG,A,ACGCGCG,*	31406	INDEL	AC=8,17,1,2,2,4;AF=0.0016,0.00339,0.0002,0.000399,0.000399,0.000799;AN=5008;BaseQRankSum=0.490;ClippingRankSum=0.000;DP=412729;ExcessHet=3.5011;FS=0.000;InbreedingCoeff=-0.0052;MLEAC=8,17,1,2,2,3;MLEAF=0.0016,0.00339,0.0002,0.000399,0.000399,0.000599;MQ=37.05;MQRankSum=0.608;QD=3.43;ReadPosRankSum=1.931;SOR=0.682
chr21	8213395	7407	ITS2	C	T,*	12044.8	SNV	AC=1,14;AF=0.0002,0.0028;AN=5008;BaseQRankSum=-0.599;ClippingRankSum=0.000;DP=410906;ExcessHet=3.1017;FS=0.000;InbreedingCoeff=-0.0026;MLEAC=1,13;MLEAF=0.0002,0.0026;MQ=13.45;MQRankSum=7.988;QD=3.04;ReadPosRankSum=0.750;SOR=0.823
chr21	8213402	7414	ITS2	G	GCC,C,GCGCC,GTC	107162	INDEL	AC=73,4,9,1;AF=0.0146,0.000799,0.0018,0.0002;AN=5008;BaseQRankSum=-0.141;ClippingRankSum=0.000;DP=414987;ExcessHet=6.3130;FS=1.581;InbreedingCoeff=-0.0174;MLEAC=73,3,9,1;MLEAF=0.0146,0.000599,0.0018,0.0002;MQ=40.71;MQRankSum=-0.427;QD=4.11;ReadPosRankSum=0.368;SOR=0.999
chr21	8213404	7416	ITS2	G	C	4848.35	SNV	AC=6;AF=0.0012;AN=5008;BaseQRankSum=-0.390;ClippingRankSum=0.000;DP=404795;ExcessHet=3.0346;FS=8.906;InbreedingCoeff=-0.0014;MLEAC=6;MLEAF=0.0012;MQ=35.47;MQRankSum=8.508;QD=3.25;ReadPosRankSum=-0.213;SOR=2.584
chr21	8213415	7427	ITS2	C	G	3976.47	SNV	AC=7;AF=0.0014;AN=5008;BaseQRankSum=1.503;ClippingRankSum=0.000;DP=405165;ExcessHet=3.0285;FS=4.322;InbreedingCoeff=-0.0014;MLEAC=7;MLEAF=0.0014;MQ=38.54;MQRankSum=0.289;QD=2.03;ReadPosRankSum=1.097;SOR=2.279
chr21	8396464	7429	ITS2	T	C,*	3709.14	SNV	AC=1,7;AF=0.0002,0.0014;AN=5004;BaseQRankSum=-2.163;ClippingRankSum=0.000;DP=78607;ExcessHet=3.0381;FS=2.223;InbreedingCoeff=0.0221;MLEAC=1,7;MLEAF=0.0002,0.0014;MQ=27.79;MQRankSum=-0.387;QD=4.99;ReadPosRankSum=-0.383;SOR=0.957
chr21	8396467	7432	ITS2	G	A,*	3776.3	SNV	AC=1,7;AF=0.0002,0.0014;AN=5008;BaseQRankSum=0.405;ClippingRankSum=0.000;DP=87132;ExcessHet=3.0347;FS=6.520;InbreedingCoeff=-0.0004;MLEAC=1,7;MLEAF=0.0002,0.0014;MQ=14.56;MQRankSum=0.291;QD=5.06;ReadPosRankSum=1.035;SOR=1.326
chr21	8396478	7443	ITS2	G	A,*	114297	SNV	AC=560,4;AF=0.112,0.000799;AN=5008;BaseQRankSum=-2.003;ClippingRankSum=0.000;DP=131194;ExcessHet=169.0882;FS=16.660;InbreedingCoeff=-0.1202;MLEAC=562,4;MLEAF=0.112,0.000799;MQ=34.41;MQRankSum=0.740;QD=3.05;ReadPosRankSum=-0.030;SOR=2.454
chr21	8396479	7444	ITS2	AGCCCGCCCCGCG	GGCCCGCCCCGCG,A,*	4047.3	INDEL	AC=1,4,4;AF=0.0002,0.000799,0.000799;AN=5008;BaseQRankSum=-2.452;ClippingRankSum=0.000;DP=134897;ExcessHet=3.0425;FS=0.000;InbreedingCoeff=0.0104;MLEAC=1,4,4;MLEAF=0.0002,0.000799,0.000799;MQ=30.62;MQRankSum=-0.042;QD=3.79;ReadPosRankSum=-0.417;SOR=0.693
chr21	8396481	7446	ITS2	C	A,*	2145.52	SNV	AC=1,4;AF=0.0002,0.000799;AN=5008;BaseQRankSum=-0.900;ClippingRankSum=0.000;DP=138322;ExcessHet=3.0190;FS=5.527;InbreedingCoeff=-0.0009;MLEAC=1,4;MLEAF=0.0002,0.000799;MQ=9.38;MQRankSum=0.957;QD=3.99;ReadPosRankSum=0.309;SOR=0.307
chr21	8213437	7449	ITS2	G	A,T,*	1170.45	SNV	AC=1,1,1;AF=0.0002,0.0002,0.0002;AN=5008;BaseQRankSum=-1.160;ClippingRankSum=0.000;DP=405299;ExcessHet=3.0129;FS=25.792;InbreedingCoeff=-0.0006;MLEAC=1,1,1;MLEAF=0.0002,0.0002,0.0002;MQ=36.17;MQRankSum=1.473;QD=1.35;ReadPosRankSum=3.639;SOR=0.022
chr21	8396487	7452	ITS2	C	A,*	1842.76	SNV	AC=2,4;AF=0.000399,0.000799;AN=5008;BaseQRankSum=-0.548;ClippingRankSum=0.000;DP=139673;ExcessHet=3.0233;FS=4.526;InbreedingCoeff=-0.0012;MLEAC=1,4;MLEAF=0.0002,0.000799;MQ=16.65;MQRankSum=0.190;QD=2.82;ReadPosRankSum=0.275;SOR=0.365
chr21	8396490	7455	ITS2	CGGCCCGCCCGGCCGCGCCCGT	C,TGGCCCGCCCGGCCGCGCCCGT,*	2103.63	INDEL	AC=2,2,4;AF=0.000399,0.000399,0.000799;AN=5008;BaseQRankSum=-1.434;ClippingRankSum=0.000;DP=140707;ExcessHet=3.0346;FS=0.894;InbreedingCoeff=-0.0015;MLEAC=2,1,4;MLEAF=0.000399,0.0002,0.000799;MQ=24.09;MQRankSum=0.227;QD=1.87;ReadPosRankSum=-0.765;SOR=0.556
chr21	8396491	7456	ITS2	GGCCC	G,*	2157.01	INDEL	AC=1,6;AF=0.0002,0.0012;AN=5008;BaseQRankSum=-0.255;ClippingRankSum=0.000;DP=141422;ExcessHet=3.0285;FS=0.927;InbreedingCoeff=-0.0013;MLEAC=1,6;MLEAF=0.0002,0.0012;MQ=16.02;MQRankSum=1.034;QD=1.85;ReadPosRankSum=0.159;SOR=0.598
chr21	8213448	7460	ITS2	G	A,T,*	873561	SNV	AC=838,1,1;AF=0.167,0.0002,0.0002;AN=5008;BaseQRankSum=-2.219;ClippingRankSum=0.000;DP=481225;ExcessHet=379.0630;FS=11.278;InbreedingCoeff=-0.1970;MLEAC=840,1,1;MLEAF=0.168,0.0002,0.0002;MQ=38.75;MQRankSum=-0.152;QD=3.84;ReadPosRankSum=0.651;SOR=2.801
chr21	8213449	7461	ITS2	AGCCCGCCCCGCG	GGCCCGCCCCGCG,A,*	5553.3	INDEL	AC=1,4,1;AF=0.0002,0.000799,0.0002;AN=5008;BaseQRankSum=0.903;ClippingRankSum=0.000;DP=355355;ExcessHet=3.0233;FS=3.965;InbreedingCoeff=-0.0012;MLEAC=1,4,1;MLEAF=0.0002,0.000799,0.0002;MQ=37.42;MQRankSum=-0.210;QD=3.66;ReadPosRankSum=1.531;SOR=0.162
chr21	8213451	7463	ITS2	C	A,*	5837.5	SNV	AC=1,4;AF=0.0002,0.000799;AN=5008;BaseQRankSum=-1.691;ClippingRankSum=0.000;DP=355036;ExcessHet=3.0190;FS=6.350;InbreedingCoeff=-0.0010;MLEAC=1,4;MLEAF=0.0002,0.000799;MQ=18.24;MQRankSum=3.704;QD=4.37;ReadPosRankSum=-2.022;SOR=0.117
chr21	8257660	7463	ITS2	G	A	351.83	SNV	AC=6;AF=0.00671;AN=894;DP=697;ExcessHet=0.0000;FS=0.000;InbreedingCoeff=-0.1123;MLEAC=7;MLEAF=0.00783;MQ=10.68;QD=19.55;SOR=0.914
chr21	8213457	7469	ITS2	C	A,T,*	5138.77	SNV	AC=2,1,4;AF=0.000399,0.0002,0.000799;AN=5008;BaseQRankSum=-1.814;ClippingRankSum=0.000;DP=354299;ExcessHet=3.0285;FS=2.053;InbreedingCoeff=-0.0014;MLEAC=2,1,4;MLEAF=0.000399,0.0002,0.000799;MQ=25.82;MQRankSum=0.808;QD=3.00;ReadPosRankSum=1.038;SOR=0.239
chr21	8213460	7472	ITS2	CGGCCCGCCCGGCCGCGCCCGT	C,TGGCCCGCCCGGCCGCGCCCGT,*	6541.89	INDEL	AC=2,2,4;AF=0.000399,0.000399,0.000799;AN=5008;BaseQRankSum=-1.577;ClippingRankSum=0.000;DP=354202;ExcessHet=3.0346;FS=1.545;InbreedingCoeff=-0.0015;MLEAC=2,2,4;MLEAF=0.000399,0.000399,0.000799;MQ=31.22;MQRankSum=-0.838;QD=3.35;ReadPosRankSum=1.449;SOR=1.042
chr21	8213461	7473	ITS2	GGCCC	CGCCC,G,*	7248.82	INDEL	AC=1,1,6;AF=0.0002,0.0002,0.0012;AN=5008;BaseQRankSum=-1.225;ClippingRankSum=0.000;DP=353930;ExcessHet=3.0346;FS=0.000;InbreedingCoeff=-0.0016;MLEAC=1,1,6;MLEAF=0.0002,0.0002,0.0012;MQ=23.70;MQRankSum=1.438;QD=3.16;ReadPosRankSum=-2.400;SOR=0.690
chr21	8213462	7474	ITS2	G	GC,T,*	4940.45	SNV	AC=2,1,3;AF=0.000399,0.0002,0.000599;AN=5008;BaseQRankSum=-0.482;ClippingRankSum=0.000;DP=353718;ExcessHet=3.0233;FS=1.284;InbreedingCoeff=-0.0006;MLEAC=2,1,3;MLEAF=0.000399,0.0002,0.000599;MQ=21.66;MQRankSum=0.908;QD=3.17;ReadPosRankSum=-1.174;SOR=1.138
chr21	8396511	7476	ITS2	T	C,*	263281	SNV	AC=633,2;AF=0.126,0.000399;AN=5008;BaseQRankSum=-0.215;ClippingRankSum=0.000;DP=281042;ExcessHet=239.3700;FS=10.413;InbreedingCoeff=-0.1323;MLEAC=647,2;MLEAF=0.129,0.000399;MQ=34.45;MQRankSum=1.103;QD=2.70;ReadPosRankSum=0.262;SOR=1.701
chr21	8213469	7481	ITS2	C	CGGCCGCGCCCGT,*	1235.45	SNV	AC=1,2;AF=0.0002,0.000399;AN=5008;BaseQRankSum=-0.323;ClippingRankSum=0.000;DP=352973;ExcessHet=3.0129;FS=4.244;InbreedingCoeff=-0.0006;MLEAC=1,2;MLEAF=0.0002,0.000399;MQ=25.63;MQRankSum=-0.052;QD=1.61;ReadPosRankSum=1.038;SOR=2.112
chr21	8396520	7485	ITS2	C	G,*	965.45	SNV	AC=1,2;AF=0.0002,0.000399;AN=5008;BaseQRankSum=1.393;ClippingRankSum=0.000;DP=274524;ExcessHet=3.0129;FS=48.818;InbreedingCoeff=-0.0006;MLEAC=1,2;MLEAF=0.0002,0.000399;MQ=11.33;MQRankSum=-3.139;QD=2.29;ReadPosRankSum=-0.795;SOR=3.719
chr21	8213479	7491	ITS2	C	T,*	1734.47	SNV	AC=1,2;AF=0.0002,0.000399;AN=5008;BaseQRankSum=-0.045;ClippingRankSum=0.000;DP=352737;ExcessHet=3.0129;FS=4.313;InbreedingCoeff=-0.0006;MLEAC=1,2;MLEAF=0.0002,0.000399;MQ=29.13;MQRankSum=0.028;QD=2.53;ReadPosRankSum=-0.094;SOR=1.573
chr21	8396527	7492	ITS2	G	A,*	1991.5	SNV	AC=4,2;AF=0.000799,0.000399;AN=5008;BaseQRankSum=-1.842;ClippingRankSum=0.000;DP=275355;ExcessHet=3.0233;FS=8.498;InbreedingCoeff=-0.0011;MLEAC=4,2;MLEAF=0.000799,0.000399;MQ=28.41;MQRankSum=0.538;QD=1.76;ReadPosRankSum=0.033;SOR=1.557
chr21	8213481	7493	ITS2	T	C,*	702800	SNV	AC=749,2;AF=0.15,0.000399;AN=5008;BaseQRankSum=0.545;ClippingRankSum=0.000;DP=375937;ExcessHet=295.5542;FS=3.235;InbreedingCoeff=-0.1757;MLEAC=748,2;MLEAF=0.149,0.000399;MQ=38.05;MQRankSum=-0.158;QD=3.47;ReadPosRankSum=0.115;SOR=1.329
chr21	8396529	7494	ITS2	T	G,*	847.5	SNV	AC=1,2;AF=0.0002,0.000399;AN=5008;BaseQRankSum=-0.815;ClippingRankSum=0.000;DP=276241;ExcessHet=3.0129;FS=18.785;InbreedingCoeff=-0.0004;MLEAC=1,2;MLEAF=0.0002,0.000399;MQ=20.38;MQRankSum=1.006;QD=1.83;ReadPosRankSum=0.454;SOR=2.665
chr21	8213485	7497	ITS2	C	CGCG	401.39	INDEL	AC=3;AF=0.000599;AN=5008;BaseQRankSum=0.968;ClippingRankSum=0.000;DP=202759;ExcessHet=3.0129;FS=4.317;InbreedingCoeff=-0.0006;MLEAC=3;MLEAF=0.000599;MQ=38.37;MQRankSum=0.030;QD=0.83;ReadPosRankSum=-1.039;SOR=3.141
chr21	8213490	7502	ITS2	C	G,*	2517.49	SNV	AC=2,2;AF=0.000399,0.000399;AN=5008;BaseQRankSum=2.606;ClippingRankSum=0.000;DP=202032;ExcessHet=3.0155;FS=8.849;InbreedingCoeff=-0.0008;MLEAC=2,2;MLEAF=0.000399,0.000399;MQ=22.88;MQRankSum=1.494;QD=3.87;ReadPosRankSum=1.927;SOR=3.277
chr21	8396538	7503	ITS2	CCCGGCGGCGA	C,*	2353.39	INDEL	AC=1,2;AF=0.0002,0.000399;AN=5008;BaseQRankSum=-0.293;ClippingRankSum=0.000;DP=286701;ExcessHet=3.0129;FS=0.000;InbreedingCoeff=-0.0006;MLEAC=1,2;MLEAF=0.0002,0.000399;MQ=22.92;MQRankSum=1.327;QD=3.35;ReadPosRankSum=0.237;SOR=0.657
chr21	8213497	7509	ITS2	G	A,*	3924.48	SNV	AC=8,2;AF=0.0016,0.000399;AN=5008;BaseQRankSum=0.629;ClippingRankSum=0.000;DP=201619;ExcessHet=3.0494;FS=3.212;InbreedingCoeff=-0.0019;MLEAC=8,2;MLEAF=0.0016,0.000399;MQ=33.84;MQRankSum=-0.096;QD=2.22;ReadPosRankSum=0.011;SOR=1.844
chr21	8396546	7511	ITS2	C	T,*	3242.23	SNV	AC=3,4;AF=0.000599,0.000799;AN=5008;BaseQRankSum=-1.268;ClippingRankSum=0.000;DP=287145;ExcessHet=3.0285;FS=0.749;InbreedingCoeff=-0.0014;MLEAC=3,4;MLEAF=0.000599,0.000799;MQ=21.78;MQRankSum=-2.717;QD=2.34;ReadPosRankSum=-1.833;SOR=0.761
chr21	8396549	7514	ITS2	C	T,*	2756.3	SNV	AC=1,3;AF=0.0002,0.000599;AN=5008;BaseQRankSum=0.543;ClippingRankSum=0.000;DP=300869;ExcessHet=3.0155;FS=3.346;InbreedingCoeff=-0.0007;MLEAC=1,3;MLEAF=0.0002,0.000599;MQ=22.49;MQRankSum=1.107;QD=3.37;ReadPosRankSum=-2.995;SOR=1.046
chr21	8213508	7520	ITS2	CCCGGCGGCGA	C,*	1905.4	INDEL	AC=1,2;AF=0.0002,0.000399;AN=5008;BaseQRankSum=0.623;ClippingRankSum=0.000;DP=199439;ExcessHet=3.0129;FS=3.463;InbreedingCoeff=-0.0005;MLEAC=1,2;MLEAF=0.0002,0.000399;MQ=21.88;MQRankSum=-0.086;QD=3.12;ReadPosRankSum=1.781;SOR=0.235
chr21	8213509	7521	ITS2	C	A,*	2217.51	SNV	AC=1,3;AF=0.0002,0.000599;AN=5008;BaseQRankSum=-1.732;ClippingRankSum=0.000;DP=198729;ExcessHet=3.0155;FS=3.767;InbreedingCoeff=-0.0007;MLEAC=1,3;MLEAF=0.0002,0.000599;MQ=14.62;MQRankSum=0.321;QD=3.08;ReadPosRankSum=-0.183;SOR=0.272
chr21	8213511	7523	ITS2	GGCGGCGACCCGCGGGACGCC	G,*	2005.27	INDEL	AC=1,3;AF=0.0002,0.000599;AN=5008;BaseQRankSum=0.394;ClippingRankSum=0.000;DP=198540;ExcessHet=3.0155;FS=3.979;InbreedingCoeff=-0.0008;MLEAC=1,3;MLEAF=0.0002,0.000599;MQ=15.18;MQRankSum=0.187;QD=2.96;ReadPosRankSum=0.768;SOR=0.230
chr21	8396558	7523	ITS2	C	T,*	873.27	SNV	AC=1,3;AF=0.0002,0.000599;AN=5008;BaseQRankSum=-4.006;ClippingRankSum=0.000;DP=303425;ExcessHet=3.0155;FS=54.430;InbreedingCoeff=-0.0008;MLEAC=1,3;MLEAF=0.0002,0.000599;MQ=19.62;MQRankSum=2.369;QD=1.27;ReadPosRankSum=1.337;SOR=7.123
chr21	8396562	7527	ITS2	G	A,*	961.45	SNV	AC=1,2;AF=0.0002,0.000399;AN=5008;BaseQRankSum=-2.172;ClippingRankSum=0.000;DP=303697;ExcessHet=3.0129;FS=15.912;InbreedingCoeff=-0.0006;MLEAC=1,2;MLEAF=0.0002,0.000399;MQ=21.07;MQRankSum=0.884;QD=1.22;ReadPosRankSum=0.009;SOR=1.136
chr21	8213516	7528	ITS2	C	T,*	2825.92	SNV	AC=4,4;AF=0.000799,0.000799;AN=5008;BaseQRankSum=0.683;ClippingRankSum=0.000;DP=194164;ExcessHet=3.0346;FS=3.217;InbreedingCoeff=-0.0015;MLEAC=3,4;MLEAF=0.000599,0.000799;MQ=24.62;MQRankSum=0.944;QD=2.78;ReadPosRankSum=0.950;SOR=1.108
chr21	8213519	7531	ITS2	C	T,*	2389.52	SNV	AC=1,3;AF=0.0002,0.000599;AN=5008;BaseQRankSum=-2.310;ClippingRankSum=0.000;DP=190908;ExcessHet=3.0155;FS=7.212;InbreedingCoeff=-0.0006;MLEAC=1,3;MLEAF=0.0002,0.000599;MQ=16.14;MQRankSum=0.365;QD=4.02;ReadPosRankSum=0.854;SOR=0.199
chr21	8396570	7535	ITS2	GTCCGCCGTCGCGCGCCCGCC	G,*	2140.23	INDEL	AC=4,2;AF=0.000799,0.000399;AN=5008;BaseQRankSum=0.494;ClippingRankSum=0.000;DP=304655;ExcessHet=3.0233;FS=12.139;InbreedingCoeff=-0.0012;MLEAC=4,2;MLEAF=0.000799,0.000399;MQ=26.04;MQRankSum=-1.083;QD=1.92;ReadPosRankSum=0.044;SOR=0.727
chr21	8213528	7540	ITS2	C	T,*	1783.68	SNV	AC=1,3;AF=0.0002,0.000599;AN=5006;BaseQRankSum=0.666;ClippingRankSum=0.000;DP=149683;ExcessHet=3.0155;FS=6.538;InbreedingCoeff=0.0007;MLEAC=1,3;MLEAF=0.0002,0.000599;MQ=14.57;MQRankSum=1.134;QD=3.40;ReadPosRankSum=1.730;SOR=4.025
chr21	8213532	7544	ITS2	G	A,*	1771.08	SNV	AC=1,2;AF=0.000202,0.000405;AN=4944;BaseQRankSum=0.899;ClippingRankSum=0.000;DP=114336;ExcessHet=3.0130;FS=8.568;InbreedingCoeff=0.0128;MLEAC=1,2;MLEAF=0.000202,0.000405;MQ=12.15;MQRankSum=1.734;QD=3.86;ReadPosRankSum=-1.108;SOR=4.191
chr21	8396580	7545	ITS2	GCGCGCCCGCCTCCGGCT	G,*	1795.43	INDEL	AC=1,4;AF=0.0002,0.000799;AN=5008;BaseQRankSum=0.420;ClippingRankSum=0.000;DP=307972;ExcessHet=3.0190;FS=3.438;InbreedingCoeff=-0.0010;MLEAC=1,4;MLEAF=0.0002,0.000799;MQ=21.21;MQRankSum=-3.661;QD=1.22;ReadPosRankSum=-0.517;SOR=1.105
chr21	8396587	7552	ITS2	C	T,*	2017.3	SNV	AC=1,5;AF=0.0002,0.000998;AN=5008;BaseQRankSum=1.447;ClippingRankSum=0.000;DP=308329;ExcessHet=3.0233;FS=6.558;InbreedingCoeff=-0.0012;MLEAC=1,5;MLEAF=0.0002,0.000998;MQ=14.00;MQRankSum=-6.178;QD=1.16;ReadPosRankSum=-4.557;SOR=1.629
chr21	8396599	7564	ITS2	G	T	7607.3	SNV	AC=6;AF=0.0012;AN=5008;BaseQRankSum=-0.914;ClippingRankSum=0.000;DP=311447;ExcessHet=3.0233;FS=12.800;InbreedingCoeff=-0.0012;MLEAC=6;MLEAF=0.0012;MQ=28.93;MQRankSum=-3.410;QD=3.35;ReadPosRankSum=0.518;SOR=1.707
chr21	8396601	7566	ITS2	GGCCGCGCCGC	GGCCGC,GGCCGCGCCGCGCCGC,G	709211	INDEL	AC=342,5,1;AF=0.0683,0.000998,0.0002;AN=5008;BaseQRankSum=0.157;ClippingRankSum=0.000;DP=403356;ExcessHet=59.3508;FS=3.617;InbreedingCoeff=-0.0744;MLEAC=342,5,1;MLEAF=0.0683,0.000998,0.0002;MQ=29.82;MQRankSum=-1.510;QD=5.90;ReadPosRankSum=-0.026;SOR=1.116
chr21	8396602	7567	ITS2	G	T,*	705771	SNV	AC=1,344;AF=0.0002,0.0687;AN=5008;BaseQRankSum=-0.835;ClippingRankSum=0.000;DP=410910;ExcessHet=58.6325;FS=3.617;InbreedingCoeff=-0.0731;MLEAC=1,344;MLEAF=0.0002,0.0687;MQ=1.69;MQRankSum=-6.028;QD=5.93;ReadPosRankSum=1.440;SOR=1.121
chr21	8396606	7571	ITS2	C	T,*	706661	SNV	AC=1,344;AF=0.0002,0.0687;AN=5008;BaseQRankSum=-1.927;ClippingRankSum=0.000;DP=413027;ExcessHet=58.6565;FS=3.617;InbreedingCoeff=-0.0732;MLEAC=1,344;MLEAF=0.0002,0.0687;MQ=2.02;MQRankSum=-4.837;QD=5.93;ReadPosRankSum=-1.301;SOR=1.121
chr21	8396607	7572	ITS2	G	T,*	6827.55	SNV	AC=1,6;AF=0.0002,0.0012;AN=4998;BaseQRankSum=-3.467;ClippingRankSum=0.000;DP=424605;ExcessHet=3.0314;FS=0.000;InbreedingCoeff=0.0203;MLEAC=1,6;MLEAF=0.0002,0.0012;MQ=7.05;MQRankSum=-1.405;QD=3.27;ReadPosRankSum=-1.438;SOR=0.708
chr21	8396609	7574	ITS2	C	T,*	7598.77	SNV	AC=1,6;AF=0.0002,0.0012;AN=5008;BaseQRankSum=-3.919;ClippingRankSum=0.000;DP=346841;ExcessHet=3.0285;FS=0.000;InbreedingCoeff=-0.0014;MLEAC=1,6;MLEAF=0.0002,0.0012;MQ=10.67;MQRankSum=-2.016;QD=3.58;ReadPosRankSum=1.441;SOR=0.644
chr21	8396610	7575	ITS2	G	T,*	6638.82	SNV	AC=2,6;AF=0.000399,0.0012;AN=5008;BaseQRankSum=0.090;ClippingRankSum=0.000;DP=346927;ExcessHet=3.0346;FS=4.106;InbreedingCoeff=-0.0016;MLEAC=2,6;MLEAF=0.000399,0.0012;MQ=13.09;MQRankSum=2.064;QD=2.96;ReadPosRankSum=-0.676;SOR=0.362
chr21	8396611	7576	ITS2	C	T,*	9346.36	SNV	AC=9,6;AF=0.0018,0.0012;AN=5008;BaseQRankSum=-2.441;ClippingRankSum=0.000;DP=350136;ExcessHet=3.1017;FS=31.476;InbreedingCoeff=-0.0028;MLEAC=9,6;MLEAF=0.0018,0.0012;MQ=24.63;MQRankSum=5.040;QD=2.23;ReadPosRankSum=-0.452;SOR=1.568
chr21	8257783	7586	ITS2	GGCCGC	G	608.89	INDEL	AC=15;AF=0.00509;AN=2948;BaseQRankSum=-0.319;ClippingRankSum=-0.000;DP=2857;ExcessHet=0.0000;FS=2.103;InbreedingCoeff=-0.1170;MLEAC=14;MLEAF=0.00475;MQ=9.27;MQRankSum=-0.000;QD=20.30;ReadPosRankSum=0.967;SOR=0.749
chr21	8396623	7588	ITS2	G	T,*	1370.49	SNV	AC=3,1;AF=0.000599,0.0002;AN=5008;BaseQRankSum=-0.654;ClippingRankSum=0.000;DP=348184;ExcessHet=3.0155;FS=2.101;InbreedingCoeff=-0.0008;MLEAC=3,1;MLEAF=0.000599,0.0002;MQ=26.58;MQRankSum=-0.216;QD=1.12;ReadPosRankSum=-1.241;SOR=0.490
chr21	8396640	7605	ITS2	C	CA,*	1775.47	SNV	AC=2,1;AF=0.000399,0.0002;AN=5008;BaseQRankSum=1.764;ClippingRankSum=0.000;DP=349095;ExcessHet=3.0129;FS=6.853;InbreedingCoeff=-0.0005;MLEAC=2,1;MLEAF=0.000399,0.0002;MQ=24.59;MQRankSum=-1.388;QD=2.81;ReadPosRankSum=0.714;SOR=1.555
chr21	8396648	7613	ITS2	GGCGGGGCGGCTCCGCCGCC	AGCGGGGCGGCTCCGCCGCC,G,*	6865.45	INDEL	AC=1,1,1;AF=0.0002,0.0002,0.0002;AN=5008;BaseQRankSum=-2.482;ClippingRankSum=0.000;DP=350260;ExcessHet=3.0129;FS=13.140;InbreedingCoeff=-0.0006;MLEAC=1,1,1;MLEAF=0.0002,0.0002,0.0002;MQ=26.87;MQRankSum=-4.375;QD=4.70;ReadPosRankSum=0.009;SOR=2.374
chr21	8396649	7614	ITS2	G	A,*	1243.49	SNV	AC=2,2;AF=0.000399,0.000399;AN=5008;BaseQRankSum=-2.695;ClippingRankSum=0.000;DP=349890;ExcessHet=3.0155;FS=15.215;InbreedingCoeff=-0.0008;MLEAC=2,2;MLEAF=0.000399,0.000399;MQ=22.98;MQRankSum=-5.028;QD=0.74;ReadPosRankSum=0.846;SOR=2.908
chr21	8396653	7618	ITS2	G	A,*	925.45	SNV	AC=1,2;AF=0.0002,0.000399;AN=5008;BaseQRankSum=0.265;ClippingRankSum=0.000;DP=349914;ExcessHet=3.0129;FS=4.000;InbreedingCoeff=-0.0006;MLEAC=1,2;MLEAF=0.0002,0.000399;MQ=17.61;MQRankSum=7.693;QD=0.89;ReadPosRankSum=0.418;SOR=0.275
chr21	8396654	7619	ITS2	G	T,*	15121.1	SNV	AC=13,2;AF=0.0026,0.000399;AN=5008;BaseQRankSum=-4.194;ClippingRankSum=0.000;DP=353595;ExcessHet=3.1016;FS=9.272;InbreedingCoeff=-0.0030;MLEAC=13,2;MLEAF=0.0026,0.000399;MQ=27.23;MQRankSum=3.517;QD=2.78;ReadPosRankSum=-0.567;SOR=1.939
chr21	8396655	7620	ITS2	C	T,*	24720.5	SNV	AC=10,2;AF=0.002,0.000399;AN=5008;BaseQRankSum=-0.633;ClippingRankSum=0.000;DP=368769;ExcessHet=3.0691;FS=3.785;InbreedingCoeff=0.0017;MLEAC=10,2;MLEAF=0.002,0.000399;MQ=27.31;MQRankSum=4.053;QD=3.68;ReadPosRankSum=-1.020;SOR=1.292
chr21	8396661	7626	ITS2	C	T,*	151927	SNV	AC=155,2;AF=0.031,0.000399;AN=5008;BaseQRankSum=-1.633;ClippingRankSum=0.000;DP=409001;ExcessHet=13.9790;FS=7.696;InbreedingCoeff=-0.0323;MLEAC=155,2;MLEAF=0.031,0.000399;MQ=27.67;MQRankSum=-3.300;QD=3.39;ReadPosRankSum=0.844;SOR=1.695
chr21	8396665	7630	ITS2	G	A,*	1950.06	SNV	AC=1,2;AF=0.0002,0.000399;AN=5008;BaseQRankSum=0.997;ClippingRankSum=0.000;DP=385723;ExcessHet=3.0131;FS=10.027;InbreedingCoeff=0.0110;MLEAC=1,2;MLEAF=0.0002,0.000399;MQ=18.03;MQRankSum=1.448;QD=2.22;ReadPosRankSum=0.631;SOR=1.841
chr21	8257843	7646	ITS2	C	T	262.12	SNV	AC=16;AF=0.00371;AN=4312;BaseQRankSum=-0.000;ClippingRankSum=-0.000;DP=6862;ExcessHet=0.0000;FS=3.118;InbreedingCoeff=-0.0772;MLEAC=16;MLEAF=0.00371;MQ=12.83;MQRankSum=-0.000;QD=5.58;ReadPosRankSum=-0.000;SOR=2.179
chr21	8396683	7648	ITS2	T	TC,TCCCC	878.39	SNV	AC=2,1;AF=0.000399,0.0002;AN=5008;BaseQRankSum=-1.256;ClippingRankSum=0.000;DP=449644;ExcessHet=3.0131;FS=2.665;InbreedingCoeff=0.0098;MLEAC=2,1;MLEAF=0.000399,0.0002;MQ=26.92;MQRankSum=-0.987;QD=1.72;ReadPosRankSum=0.125;SOR=1.105
chr21	8396688	7653	ITS2	C	A	26706.8	SNV	AC=32;AF=0.00639;AN=5008;BaseQRankSum=-2.949;ClippingRankSum=0.000;DP=462350;ExcessHet=3.4997;FS=1.023;InbreedingCoeff=-0.0067;MLEAC=32;MLEAF=0.00639;MQ=26.10;MQRankSum=-1.867;QD=2.77;ReadPosRankSum=1.289;SOR=0.996
chr21	8213645	7657	ITS2	T	G	36.58	SNV	AC=11;AF=0.0035;AN=3146;BaseQRankSum=-1.383;ClippingRankSum=0.000;DP=13024;ExcessHet=7.4117;FS=0.000;InbreedingCoeff=-0.0878;MLEAC=6;MLEAF=0.00191;MQ=31.43;MQRankSum=0.487;QD=0.27;ReadPosRankSum=-0.000;SOR=0.013
chr21	8396696	7661	ITS2	C	G	6569.49	SNV	AC=4;AF=0.000799;AN=5008;BaseQRankSum=-3.911;ClippingRankSum=0.000;DP=484994;ExcessHet=3.0155;FS=5.381;InbreedingCoeff=-0.0008;MLEAC=4;MLEAF=0.000799;MQ=25.96;MQRankSum=3.458;QD=4.45;ReadPosRankSum=-0.576;SOR=1.612
chr21	8257866	7669	ITS2	C	G	317.29	SNV	AC=6;AF=0.00136;AN=4404;BaseQRankSum=-0.000;ClippingRankSum=-0.000;DP=7333;ExcessHet=3.0472;FS=56.640;InbreedingCoeff=-0.0848;MLEAC=7;MLEAF=0.00159;MQ=15.58;MQRankSum=-0.000;QD=7.21;ReadPosRankSum=-0.431;SOR=1.998
chr21	8213658	7670	ITS2	C	G	761.37	SNV	AC=9;AF=0.00255;AN=3532;BaseQRankSum=2.521;ClippingRankSum=-0.000;DP=17890;ExcessHet=0.0000;FS=0.000;InbreedingCoeff=-0.0208;MLEAC=7;MLEAF=0.00198;MQ=21.99;MQRankSum=1.086;QD=20.58;ReadPosRankSum=0.120;SOR=3.855
chr21	8396707	7672	ITS2	C	T,G	4027.47	SNV	AC=1,2;AF=0.0002,0.000399;AN=5008;BaseQRankSum=0.331;ClippingRankSum=0.000;DP=428310;ExcessHet=3.0129;FS=0.000;InbreedingCoeff=-0.0005;MLEAC=1,2;MLEAF=0.0002,0.000399;MQ=24.39;MQRankSum=-0.781;QD=4.14;ReadPosRankSum=-0.976;SOR=0.833
chr21	8396709	7674	ITS2	G	C	5648.5	SNV	AC=4;AF=0.000799;AN=5008;BaseQRankSum=1.714;ClippingRankSum=0.000;DP=427049;ExcessHet=3.0190;FS=110.275;InbreedingCoeff=-0.0009;MLEAC=4;MLEAF=0.000799;MQ=26.86;MQRankSum=-3.372;QD=10.20;ReadPosRankSum=1.092;SOR=7.722
chr21	8396713	7678	ITS2	G	T	2793.89	SNV	AC=7;AF=0.0014;AN=5008;BaseQRankSum=-0.241;ClippingRankSum=0.000;DP=419782;ExcessHet=3.0415;FS=7.673;InbreedingCoeff=-0.0016;MLEAC=6;MLEAF=0.0012;MQ=27.55;MQRankSum=-1.990;QD=3.31;ReadPosRankSum=0.664;SOR=1.707
chr21	8396717	7682	ITS2	C	T	7301.04	SNV	AC=9;AF=0.0018;AN=5008;BaseQRankSum=-2.151;ClippingRankSum=0.000;DP=423888;ExcessHet=17.1437;FS=53.818;InbreedingCoeff=-0.0202;MLEAC=9;MLEAF=0.0018;MQ=29.62;MQRankSum=8.962;QD=3.18;ReadPosRankSum=-1.154;SOR=0.203
chr21	8396719	7684	ITS2	T	G,C	7389.56	SNV	AC=2,12;AF=0.000399,0.0024;AN=5008;BaseQRankSum=0.792;ClippingRankSum=0.000;DP=439411;ExcessHet=3.1350;FS=4.817;InbreedingCoeff=0.0535;MLEAC=2,13;MLEAF=0.000399,0.0026;MQ=24.82;MQRankSum=-0.046;QD=2.38;ReadPosRankSum=-0.320;SOR=0.239
chr21	8396723	7688	ITS2	G	T	5766.39	SNV	AC=9;AF=0.0018;AN=5008;BaseQRankSum=-1.781;ClippingRankSum=0.000;DP=386565;ExcessHet=3.0416;FS=19.797;InbreedingCoeff=-0.0018;MLEAC=9;MLEAF=0.0018;MQ=26.65;MQRankSum=-3.065;QD=4.02;ReadPosRankSum=0.643;SOR=2.695
chr21	8213679	7691	ITS2	C	T	5168.8	SNV	AC=20;AF=0.00538;AN=3720;BaseQRankSum=-0.000;ClippingRankSum=-0.000;DP=23836;ExcessHet=0.0000;FS=0.000;InbreedingCoeff=-0.0011;MLEAC=21;MLEAF=0.00565;MQ=35.87;MQRankSum=2.233;QD=14.85;ReadPosRankSum=0.084;SOR=0.992
chr21	8213683	7695	ITS2	C	T	267.31	SNV	AC=4;AF=0.00106;AN=3782;DP=25026;ExcessHet=0.0001;FS=0.000;InbreedingCoeff=-0.0225;MLEAC=2;MLEAF=0.000529;MQ=17.26;QD=29.70;SOR=4.615
chr21	8396735	7700	ITS2	C	T	1151.49	SNV	AC=4;AF=0.000799;AN=5008;BaseQRankSum=-2.007;ClippingRankSum=0.000;DP=373360;ExcessHet=3.0155;FS=56.581;InbreedingCoeff=-0.0008;MLEAC=4;MLEAF=0.000799;MQ=30.88;MQRankSum=4.253;QD=3.76;ReadPosRankSum=0.693;SOR=1.050
chr21	8396743	7708	ITS2	C	A	1183.49	SNV	AC=4;AF=0.000799;AN=5008;BaseQRankSum=-1.698;ClippingRankSum=0.000;DP=344139;ExcessHet=3.0155;FS=66.725;InbreedingCoeff=-0.0008;MLEAC=4;MLEAF=0.000799;MQ=31.38;MQRankSum=3.988;QD=4.20;ReadPosRankSum=1.530;SOR=1.657
chr21	8213697	7709	ITS2	C	T	981.1	SNV	AC=6;AF=0.00154;AN=3892;BaseQRankSum=-0.000;ClippingRankSum=-0.000;DP=27868;ExcessHet=0.0515;FS=0.000;InbreedingCoeff=-0.0287;MLEAC=5;MLEAF=0.00128;MQ=33.95;MQRankSum=-0.431;QD=16.08;ReadPosRankSum=-0.000;SOR=0.662
chr21	8213705	7717	ITS2	C	A	986.71	SNV	AC=7;AF=0.0018;AN=3888;BaseQRankSum=-0.000;ClippingRankSum=-0.000;DP=28534;ExcessHet=0.0310;FS=0.000;InbreedingCoeff=-0.0230;MLEAC=6;MLEAF=0.00154;MQ=34.35;MQRankSum=-0.431;QD=16.18;ReadPosRankSum=-0.000;SOR=0.663
chr21	8396752	7717	ITS2	T	TC	3709.88	SNV	AC=3;AF=0.000599;AN=5008;BaseQRankSum=-2.054;ClippingRankSum=0.000;DP=300774;ExcessHet=360.0996;FS=1.165;InbreedingCoeff=-0.1128;MLEAC=3;MLEAF=0.000599;MQ=24.19;MQRankSum=-0.451;QD=7.15;ReadPosRankSum=0.939;SOR=1.060
chr21	8396763	7728	ITS2	G	T,A	2073.63	SNV	AC=2,1;AF=0.000399,0.0002;AN=5008;BaseQRankSum=0.086;ClippingRankSum=0.000;DP=200949;ExcessHet=3.0129;FS=72.038;InbreedingCoeff=0.0003;MLEAC=2,1;MLEAF=0.000399,0.0002;MQ=28.30;MQRankSum=3.482;QD=5.76;ReadPosRankSum=1.785;SOR=1.804
chr21	8396767	7732	ITS2	C	G	1392.46	SNV	AC=3;AF=0.000599;AN=5008;BaseQRankSum=-4.242;ClippingRankSum=0.000;DP=200333;ExcessHet=3.0129;FS=30.690;InbreedingCoeff=-0.0007;MLEAC=3;MLEAF=0.000599;MQ=24.85;MQRankSum=-1.724;QD=4.41;ReadPosRankSum=-0.908;SOR=6.218
chr21	8213725	7737	ITS2	G	T,A	955.7	SNV	AC=8,1;AF=0.00205,0.000257;AN=3896;BaseQRankSum=0.319;ClippingRankSum=0.000;DP=31280;ExcessHet=0.0001;FS=0.000;InbreedingCoeff=0.0651;MLEAC=7,1;MLEAF=0.0018,0.000257;MQ=30.08;MQRankSum=-0.000;QD=12.41;ReadPosRankSum=-0.000;SOR=1.640
chr21	8257934	7737	ITS2	T	TC	123.07	SNV	AC=3;AF=0.000821;AN=3656;BaseQRankSum=-0.842;ClippingRankSum=-0.000;DP=5174;ExcessHet=0.0460;FS=0.000;InbreedingCoeff=-0.1319;MLEAC=3;MLEAF=0.000821;MQ=5.45;MQRankSum=-0.000;QD=13.67;ReadPosRankSum=-0.623;SOR=2.093
chr21	8213736	7748	ITS2	G	C	128.44	SNV	AC=4;AF=0.00103;AN=3868;DP=32019;ExcessHet=0.0000;FS=0.000;InbreedingCoeff=-0.0118;MLEAC=2;MLEAF=0.000517;MQ=14.33;QD=25.69;SOR=3.611
chr21	8396786	7751	ITS2	G	A	534.13	SNV	AC=11;AF=0.00235;AN=4672;BaseQRankSum=0.988;ClippingRankSum=0.000;DP=100815;ExcessHet=3.3621;FS=106.199;InbreedingCoeff=-0.0292;MLEAC=9;MLEAF=0.00193;MQ=17.71;MQRankSum=3.005;QD=1.66;ReadPosRankSum=2.200;SOR=4.639
chr21	8396790	7755	ITS2	G	C,A	2831.87	SNV	AC=1,26;AF=0.000218,0.00566;AN=4594;BaseQRankSum=-0.593;ClippingRankSum=0.000;DP=94755;ExcessHet=0.1887;FS=10.322;InbreedingCoeff=0.0273;MLEAC=1,25;MLEAF=0.000218,0.00544;MQ=19.76;MQRankSum=-0.271;QD=4.99;ReadPosRankSum=0.574;SOR=1.475
chr21	8396791	7756	ITS2	T	C	30615.1	SNV	AC=35;AF=0.00773;AN=4528;BaseQRankSum=-0.123;ClippingRankSum=0.000;DP=91982;ExcessHet=26.8227;FS=14.767;InbreedingCoeff=-0.0526;MLEAC=36;MLEAF=0.00795;MQ=30.46;MQRankSum=-0.389;QD=15.68;ReadPosRankSum=0.333;SOR=1.852
chr21	8213748	7760	ITS2	G	A	481.03	SNV	AC=15;AF=0.00382;AN=3928;BaseQRankSum=-0.000;ClippingRankSum=-0.000;DP=32875;ExcessHet=0.0000;FS=0.000;InbreedingCoeff=0.0174;MLEAC=11;MLEAF=0.0028;MQ=29.86;MQRankSum=-0.000;QD=11.45;ReadPosRankSum=-0.000;SOR=1.402
chr21	8396795	7760	ITS2	C	G,A,T	347217	SNV	AC=912,6,14;AF=0.256,0.00168,0.00393;AN=3562;BaseQRankSum=0.000;ClippingRankSum=0.000;DP=113151;ExcessHet=0.0002;FS=31.170;InbreedingCoeff=0.2048;MLEAC=994,6,10;MLEAF=0.279,0.00168,0.00281;MQ=29.20;MQRankSum=-4.113;QD=10.39;ReadPosRankSum=-2.302;SOR=4.364
chr21	8213752	7764	ITS2	G	C,T	208.92	SNV	AC=3,1;AF=0.000767,0.000256;AN=3912;BaseQRankSum=-0.000;ClippingRankSum=-0.000;DP=33104;ExcessHet=3.0116;FS=0.000;InbreedingCoeff=0.0510;MLEAC=2,1;MLEAF=0.000511,0.000256;MQ=20.50;MQRankSum=1.645;QD=7.46;ReadPosRankSum=0.756;SOR=0.336
chr21	8213753	7765	ITS2	T	C	11144.8	SNV	AC=57;AF=0.0148;AN=3862;BaseQRankSum=-0.000;ClippingRankSum=-0.000;DP=33306;ExcessHet=-0.0000;FS=0.000;InbreedingCoeff=0.0831;MLEAC=46;MLEAF=0.0119;MQ=33.08;MQRankSum=-1.257;QD=19.48;ReadPosRankSum=0.253;SOR=0.753
chr21	8213757	7769	ITS2	C	G,A	58009.1	SNV	AC=309,7;AF=0.0904,0.00205;AN=3418;BaseQRankSum=-0.000;ClippingRankSum=-0.000;DP=37611;ExcessHet=-0.0000;FS=0.000;InbreedingCoeff=0.2213;MLEAC=298,4;MLEAF=0.0872,0.00117;MQ=32.67;MQRankSum=-0.310;QD=10.85;ReadPosRankSum=-0.508;SOR=0.412
chr21	8257973	7776	ITS2	T	C	1529.36	SNV	AC=51;AF=0.0303;AN=1682;BaseQRankSum=-0.000;ClippingRankSum=-0.000;DP=2679;ExcessHet=-0.0000;FS=0.000;InbreedingCoeff=-0.0405;MLEAC=40;MLEAF=0.0238;MQ=7.14;MQRankSum=-0.000;QD=29.41;ReadPosRankSum=-0.000;SOR=2.043
chr21	8213766	7778	ITS2	G	GC	412.71	SNV	AC=6;AF=0.00124;AN=4824;BaseQRankSum=0.000;ClippingRankSum=0.000;DP=40812;ExcessHet=0.2016;FS=0.000;InbreedingCoeff=-0.0153;MLEAC=5;MLEAF=0.00104;MQ=31.44;MQRankSum=-2.628;QD=3.93;ReadPosRankSum=-0.477;SOR=0.072
chr21	8396814	7779	ITS2	C	G	699.52	SNV	AC=5;AF=0.000998;AN=5008;BaseQRankSum=0.497;ClippingRankSum=0.000;DP=112370;ExcessHet=3.0190;FS=0.000;InbreedingCoeff=-0.0012;MLEAC=5;MLEAF=0.000998;MQ=30.64;MQRankSum=4.442;QD=2.81;ReadPosRankSum=3.976;SOR=0.033
chr21	8257978	7781	ITS2	C	T,G,A	18910.7	SNV	AC=517,37,6;AF=0.708,0.0507,0.00822;AN=730;BaseQRankSum=-0.000;ClippingRankSum=-0.000;DP=2304;ExcessHet=0.0000;FS=152.652;InbreedingCoeff=0.4851;MLEAC=471,21,3;MLEAF=0.645,0.0288,0.00411;MQ=14.58;MQRankSum=-1.150;QD=22.92;ReadPosRankSum=-0.000;SOR=11.189
chr21	8396818	7783	ITS2	T	G,C	386.13	SNV	AC=11,2;AF=0.0022,0.000399;AN=5008;BaseQRankSum=-2.440;ClippingRankSum=0.000;DP=112429;ExcessHet=3.0784;FS=0.000;InbreedingCoeff=-0.0011;MLEAC=5,2;MLEAF=0.000998,0.000399;MQ=31.69;MQRankSum=-0.286;QD=0.80;ReadPosRankSum=0.625;SOR=0.005
chr21	8213775	7787	ITS2	T	G	95.55	SNV	AC=15;AF=0.00318;AN=4724;BaseQRankSum=-1.400;ClippingRankSum=-0.000;DP=40864;ExcessHet=6.2604;FS=0.000;InbreedingCoeff=-0.0586;MLEAC=8;MLEAF=0.00169;MQ=32.73;MQRankSum=-0.000;QD=0.97;ReadPosRankSum=-0.366;SOR=0.014
chr21	8396829	7794	ITS2	C	A	4341.44	SNV	AC=24;AF=0.00479;AN=5008;BaseQRankSum=-1.807;ClippingRankSum=0.000;DP=112470;ExcessHet=3.2508;FS=0.000;InbreedingCoeff=-0.0052;MLEAC=24;MLEAF=0.00479;MQ=32.88;MQRankSum=-1.893;QD=2.97;ReadPosRankSum=0.394;SOR=0.040
chr21	8213793	7805	ITS2	TCGCCGGGCCCGTCTCCCGACGGAG	GCGCCGGGCCCGTCTCCCGACGGAG,T	2126.6	SNV	AC=17,2;AF=0.00357,0.000421;AN=4756;BaseQRankSum=-1.076;ClippingRankSum=0.000;DP=37144;ExcessHet=3.2174;FS=0.000;InbreedingCoeff=0.0524;MLEAC=9,2;MLEAF=0.00189,0.000421;MQ=33.93;MQRankSum=0.524;QD=9.45;ReadPosRankSum=-0.000;SOR=0.043
chr21	8396843	7808	ITS2	T	C,*	6063.69	SNV	AC=2,2;AF=0.000399,0.000399;AN=5008;BaseQRankSum=-1.963;ClippingRankSum=0.000;DP=117069;ExcessHet=3.0156;FS=0.000;InbreedingCoeff=0.0014;MLEAC=2,2;MLEAF=0.000399,0.000399;MQ=26.30;MQRankSum=-0.115;QD=9.59;ReadPosRankSum=-0.483;SOR=0.030
chr21	8396848	7813	ITS2	C	T,*	5597.45	SNV	AC=1,2;AF=0.0002,0.000399;AN=5008;BaseQRankSum=0.418;ClippingRankSum=0.000;DP=121460;ExcessHet=3.0129;FS=0.000;InbreedingCoeff=-0.0006;MLEAC=1,2;MLEAF=0.0002,0.000399;MQ=12.39;MQRankSum=5.926;QD=10.23;ReadPosRankSum=1.895;SOR=0.192
chr21	8396851	7816	ITS2	C	T,*	5585.45	SNV	AC=1,2;AF=0.0002,0.000399;AN=5008;BaseQRankSum=-2.320;ClippingRankSum=0.000;DP=122945;ExcessHet=3.0129;FS=0.000;InbreedingCoeff=-0.0006;MLEAC=1,2;MLEAF=0.0002,0.000399;MQ=14.13;MQRankSum=0.198;QD=11.52;ReadPosRankSum=-0.075;SOR=0.169
chr21	8396854	7819	ITS2	A	G,*	5470.45	SNV	AC=1,2;AF=0.0002,0.000399;AN=5008;BaseQRankSum=0.115;ClippingRankSum=0.000;DP=123376;ExcessHet=3.0129;FS=0.000;InbreedingCoeff=-0.0006;MLEAC=1,2;MLEAF=0.0002,0.000399;MQ=15.40;MQRankSum=-2.430;QD=8.25;ReadPosRankSum=-2.240;SOR=0.137
chr21	8396856	7821	ITS2	CGTCGGGCGGGCG	C	4954.44	INDEL	AC=4;AF=0.000799;AN=5008;BaseQRankSum=0.540;ClippingRankSum=0.000;DP=123982;ExcessHet=3.0233;FS=0.000;InbreedingCoeff=-0.0010;MLEAC=4;MLEAF=0.000799;MQ=24.68;MQRankSum=-0.153;QD=6.68;ReadPosRankSum=1.091;SOR=0.080
chr21	8213810	7822	ITS2	C	T,*	1981.24	SNV	AC=3,2;AF=0.000611,0.000407;AN=4910;BaseQRankSum=-0.413;ClippingRankSum=0.000;DP=37136;ExcessHet=0.0047;FS=0.000;InbreedingCoeff=0.0398;MLEAC=2,2;MLEAF=0.000407,0.000407;MQ=15.28;MQRankSum=2.682;QD=18.87;ReadPosRankSum=0.392;SOR=0.967
chr21	8396858	7823	ITS2	TCGGGCGGG	TCGGG,T,*	18107.7	INDEL	AC=17,3,4;AF=0.00339,0.000599,0.000799;AN=5008;BaseQRankSum=0.284;ClippingRankSum=0.000;DP=126459;ExcessHet=3.2513;FS=0.000;InbreedingCoeff=-0.0041;MLEAC=16,3,4;MLEAF=0.00319,0.000599,0.000799;MQ=24.07;MQRankSum=2.403;QD=4.93;ReadPosRankSum=-0.457;SOR=0.049
chr21	8396859	7824	ITS2	C	G,*	19509.5	SNV	AC=7,23;AF=0.0014,0.00459;AN=5008;BaseQRankSum=1.509;ClippingRankSum=0.000;DP=126568;ExcessHet=3.3908;FS=0.000;InbreedingCoeff=-0.0055;MLEAC=7,23;MLEAF=0.0014,0.00459;MQ=11.37;MQRankSum=3.287;QD=4.53;ReadPosRankSum=4.811;SOR=0.051
chr21	8396864	7829	ITS2	GGGCGGTCGGGCC	G,*	9036.77	INDEL	AC=4,7;AF=0.000799,0.0014;AN=5008;BaseQRankSum=0.814;ClippingRankSum=0.000;DP=125006;ExcessHet=3.0581;FS=0.000;InbreedingCoeff=-0.0022;MLEAC=4,7;MLEAF=0.000799,0.0014;MQ=18.33;MQRankSum=0.776;QD=3.79;ReadPosRankSum=2.110;SOR=0.045
chr21	8213818	7830	ITS2	CGTCGGGCGGGCG	C	189.64	INDEL	AC=3;AF=0.000609;AN=4930;BaseQRankSum=0.000;ClippingRankSum=0.000;DP=38270;ExcessHet=3.1964;FS=0.000;InbreedingCoeff=-0.0200;MLEAC=3;MLEAF=0.000609;MQ=20.48;MQRankSum=0.552;QD=3.39;ReadPosRankSum=1.570;SOR=0.066
chr21	8396866	7831	ITS2	G	GCGGT,*	9783.7	SNV	AC=1,11;AF=0.0002,0.0022;AN=5008;BaseQRankSum=0.296;ClippingRankSum=0.000;DP=125606;ExcessHet=3.0677;FS=0.000;InbreedingCoeff=-0.0023;MLEAC=1,11;MLEAF=0.0002,0.0022;MQ=8.86;MQRankSum=1.255;QD=3.92;ReadPosRankSum=-0.562;SOR=0.041
chr21	8213820	7832	ITS2	TCGGG	T,*	2002.83	INDEL	AC=7,3;AF=0.00142,0.00061;AN=4918;BaseQRankSum=-0.674;ClippingRankSum=0.000;DP=38895;ExcessHet=3.0573;FS=0.000;InbreedingCoeff=0.0345;MLEAC=6,3;MLEAF=0.00122,0.00061;MQ=30.66;MQRankSum=0.760;QD=16.55;ReadPosRankSum=0.431;SOR=0.079
chr21	8396870	7835	ITS2	T	C,*	110255	SNV	AC=63,4;AF=0.0126,0.000799;AN=5008;BaseQRankSum=0.788;ClippingRankSum=0.000;DP=135950;ExcessHet=4.9583;FS=0.000;InbreedingCoeff=-0.0132;MLEAC=63,4;MLEAF=0.0126,0.000799;MQ=27.87;MQRankSum=6.047;QD=6.56;ReadPosRankSum=2.415;SOR=0.515
chr21	8396871	7836	ITS2	C	G,*	4315.5	SNV	AC=1,4;AF=0.0002,0.000799;AN=5008;BaseQRankSum=-0.123;ClippingRankSum=0.000;DP=123790;ExcessHet=3.0190;FS=0.000;InbreedingCoeff=-0.0010;MLEAC=1,4;MLEAF=0.0002,0.000799;MQ=10.33;MQRankSum=-1.698;QD=2.90;ReadPosRankSum=-1.305;SOR=0.045
chr21	8213826	7838	ITS2	GGGCGGTCGGGCC	G,*	616.82	INDEL	AC=2,4;AF=0.000404,0.000808;AN=4948;BaseQRankSum=0.514;ClippingRankSum=0.000;DP=38849;ExcessHet=3.0243;FS=0.000;InbreedingCoeff=0.0173;MLEAC=2,4;MLEAF=0.000404,0.000808;MQ=24.12;MQRankSum=-0.974;QD=3.54;ReadPosRankSum=-0.729;SOR=0.033
chr21	8396876	7841	ITS2	C	T,*	60980.3	SNV	AC=51,4;AF=0.0102,0.000799;AN=5008;BaseQRankSum=-0.641;ClippingRankSum=0.000;DP=130491;ExcessHet=4.3139;FS=0.000;InbreedingCoeff=-0.0109;MLEAC=51,4;MLEAF=0.0102,0.000799;MQ=27.65;MQRankSum=4.236;QD=5.13;ReadPosRankSum=0.638;SOR=0.123
chr21	8213832	7844	ITS2	T	C,*	22266.3	SNV	AC=73,2;AF=0.0148,0.000407;AN=4920;BaseQRankSum=0.711;ClippingRankSum=0.000;DP=39934;ExcessHet=0.0001;FS=0.000;InbreedingCoeff=0.0635;MLEAC=72,2;MLEAF=0.0146,0.000407;MQ=33.62;MQRankSum=1.741;QD=11.98;ReadPosRankSum=-0.271;SOR=1.748
chr21	8213833	7845	ITS2	C	G,*	447.37	SNV	AC=1,2;AF=0.000202,0.000404;AN=4948;BaseQRankSum=-0.000;ClippingRankSum=-0.000;DP=38868;ExcessHet=3.0130;FS=0.000;InbreedingCoeff=0.0154;MLEAC=1,2;MLEAF=0.000202,0.000404;MQ=8.00;MQRankSum=0.339;QD=4.22;ReadPosRankSum=0.088;SOR=0.038
chr21	8396883	7848	ITS2	A	ATTCC	11227.2	INDEL	AC=9;AF=0.0018;AN=5008;BaseQRankSum=-0.197;ClippingRankSum=0.000;DP=123922;ExcessHet=3.0416;FS=0.000;InbreedingCoeff=-0.0018;MLEAC=8;MLEAF=0.0016;MQ=24.05;MQRankSum=0.366;QD=4.82;ReadPosRankSum=-0.432;SOR=0.064
chr21	8396884	7849	ITS2	TTCCG	T,GTCCG,TTCCGTCCG	18502	INDEL	AC=29,2,2;AF=0.00579,0.000399,0.000399;AN=5008;BaseQRankSum=-2.209;ClippingRankSum=0.000;DP=162877;ExcessHet=3.4911;FS=0.000;InbreedingCoeff=0.0096;MLEAC=27,2,2;MLEAF=0.00539,0.000399,0.000399;MQ=25.64;MQRankSum=-0.341;QD=2.29;ReadPosRankSum=-0.799;SOR=0.276
chr21	8213838	7850	ITS2	C	T,*	10992.9	SNV	AC=51,2;AF=0.0103,0.000404;AN=4954;BaseQRankSum=-0.000;ClippingRankSum=0.000;DP=38904;ExcessHet=0.0799;FS=0.000;InbreedingCoeff=0.0416;MLEAC=49,2;MLEAF=0.00989,0.000404;MQ=32.89;MQRankSum=2.189;QD=8.64;ReadPosRankSum=-0.180;SOR=0.586
chr21	8396885	7850	ITS2	T	C,*	19343.5	SNV	AC=7,29;AF=0.0014,0.00579;AN=5008;BaseQRankSum=1.139;ClippingRankSum=0.000;DP=129946;ExcessHet=3.5623;FS=0.000;InbreedingCoeff=-0.0067;MLEAC=6,27;MLEAF=0.0012,0.00539;MQ=8.89;MQRankSum=3.081;QD=2.40;ReadPosRankSum=2.703;SOR=0.086
chr21	8396888	7853	ITS2	G	T,*	16578.8	SNV	AC=2,29;AF=0.000399,0.00579;AN=5008;BaseQRankSum=-2.065;ClippingRankSum=0.000;DP=128064;ExcessHet=3.4163;FS=0.000;InbreedingCoeff=-0.0061;MLEAC=2,27;MLEAF=0.000399,0.00539;MQ=6.31;MQRankSum=-2.308;QD=2.26;ReadPosRankSum=-0.775;SOR=0.087
chr21	8258053	7856	ITS2	T	C	202.95	SNV	AC=6;AF=0.00135;AN=4446;BaseQRankSum=-0.000;ClippingRankSum=-0.000;DP=8307;ExcessHet=0.4352;FS=0.000;InbreedingCoeff=-0.0951;MLEAC=5;MLEAF=0.00112;MQ=12.72;MQRankSum=-0.000;QD=10.15;ReadPosRankSum=-0.000;SOR=0.557
chr21	8213845	7857	ITS2	A	ATTCC	822.57	INDEL	AC=3;AF=0.000612;AN=4902;BaseQRankSum=0.366;ClippingRankSum=-0.000;DP=39949;ExcessHet=9.6846;FS=0.000;InbreedingCoeff=-0.0382;MLEAC=3;MLEAF=0.000612;MQ=25.37;MQRankSum=-0.634;QD=14.18;ReadPosRankSum=-0.000;SOR=0.063
chr21	8213846	7858	ITS2	TTCCG	GTCCG,T	9287.54	SNV	AC=73,21;AF=0.0151,0.00435;AN=4830;BaseQRankSum=-1.150;ClippingRankSum=-0.000;DP=40154;ExcessHet=10.6343;FS=0.000;InbreedingCoeff=0.0620;MLEAC=52,20;MLEAF=0.0108,0.00414;MQ=30.86;MQRankSum=-0.357;QD=5.91;ReadPosRankSum=0.000;SOR=2.046
chr21	8213847	7859	ITS2	T	C,*	3555.99	SNV	AC=7,21;AF=0.00143,0.0043;AN=4886;BaseQRankSum=-0.674;ClippingRankSum=0.000;DP=40039;ExcessHet=3.4685;FS=0.000;InbreedingCoeff=0.0562;MLEAC=4,20;MLEAF=0.000819,0.00409;MQ=17.35;MQRankSum=0.317;QD=6.95;ReadPosRankSum=0.431;SOR=1.306
chr21	8258059	7862	ITS2	C	T	163.03	SNV	AC=6;AF=0.00131;AN=4566;BaseQRankSum=-0.000;ClippingRankSum=-0.000;DP=9148;ExcessHet=0.0377;FS=0.000;InbreedingCoeff=-0.0646;MLEAC=4;MLEAF=0.000876;MQ=14.88;MQRankSum=-0.000;QD=5.82;ReadPosRankSum=-0.431;SOR=1.358
chr21	8396899	7864	ITS2	C	G,T	2123.49	SNV	AC=2,2;AF=0.000399,0.000399;AN=5008;BaseQRankSum=1.830;ClippingRankSum=0.000;DP=120684;ExcessHet=3.0155;FS=0.000;InbreedingCoeff=-0.0008;MLEAC=2,2;MLEAF=0.000399,0.000399;MQ=24.61;MQRankSum=-0.139;QD=2.41;ReadPosRankSum=0.519;SOR=0.052
chr21	8258066	7869	ITS2	A	ATTCC	145.32	INDEL	AC=3;AF=0.000644;AN=4660;BaseQRankSum=-0.000;ClippingRankSum=-0.000;DP=10168;ExcessHet=3.5199;FS=0.000;InbreedingCoeff=-0.0717;MLEAC=3;MLEAF=0.000644;MQ=14.81;MQRankSum=-0.000;QD=8.55;ReadPosRankSum=-0.000;SOR=1.270
chr21	8258067	7870	ITS2	TTCCG	T	433.64	INDEL	AC=7;AF=0.00151;AN=4630;BaseQRankSum=-0.000;ClippingRankSum=-0.000;DP=10275;ExcessHet=4.1161;FS=0.000;InbreedingCoeff=-0.0840;MLEAC=8;MLEAF=0.00173;MQ=14.63;MQRankSum=-0.000;QD=9.43;ReadPosRankSum=-0.000;SOR=0.234
chr21	8396908	7873	ITS2	G	T	34056.6	SNV	AC=36;AF=0.00719;AN=5008;BaseQRankSum=-1.054;ClippingRankSum=0.000;DP=129540;ExcessHet=3.6571;FS=0.000;InbreedingCoeff=-0.0077;MLEAC=36;MLEAF=0.00719;MQ=23.69;MQRankSum=-0.323;QD=3.45;ReadPosRankSum=-0.160;SOR=0.085
chr21	8213870	7882	ITS2	G	T	834.17	SNV	AC=18;AF=0.00362;AN=4978;BaseQRankSum=-0.000;ClippingRankSum=-0.000;DP=38650;ExcessHet=3.5632;FS=2.487;InbreedingCoeff=-0.0158;MLEAC=16;MLEAF=0.00321;MQ=27.08;MQRankSum=0.440;QD=3.14;ReadPosRankSum=-0.000;SOR=0.206
chr21	8258091	7894	ITS2	G	T	319.96	SNV	AC=12;AF=0.0025;AN=4800;BaseQRankSum=-0.000;ClippingRankSum=-0.000;DP=12967;ExcessHet=3.2635;FS=1.279;InbreedingCoeff=-0.0480;MLEAC=11;MLEAF=0.00229;MQ=20.85;MQRankSum=-0.000;QD=3.05;ReadPosRankSum=-0.180;SOR=0.925
chr21	8396929	7894	28S	G	C	3561.49	SNV	AC=4;AF=0.000799;AN=5008;BaseQRankSum=0.561;ClippingRankSum=0.000;DP=118654;ExcessHet=3.0155;FS=0.000;InbreedingCoeff=-0.0008;MLEAC=4;MLEAF=0.000799;MQ=23.41;MQRankSum=-1.764;QD=3.23;ReadPosRankSum=0.571;SOR=0.066
chr21	8396930	7895	28S	A	G,T	1497.48	SNV	AC=2,1;AF=0.000399,0.0002;AN=5008;BaseQRankSum=0.766;ClippingRankSum=0.000;DP=118390;ExcessHet=3.0129;FS=0.000;InbreedingCoeff=-0.0005;MLEAC=2,1;MLEAF=0.000399,0.0002;MQ=22.28;MQRankSum=1.347;QD=2.35;ReadPosRankSum=-2.006;SOR=0.064
chr21	8213891	7903	28S	G	C	76.51	SNV	AC=3;AF=0.000603;AN=4976;BaseQRankSum=0.000;ClippingRankSum=0.000;DP=37469;ExcessHet=3.0234;FS=0.000;InbreedingCoeff=-0.0109;MLEAC=3;MLEAF=0.000603;MQ=26.32;MQRankSum=0.048;QD=1.91;ReadPosRankSum=0.723;SOR=0.119
chr21	8213920	7932	28S	A	G	442.86	SNV	AC=3;AF=0.000612;AN=4902;BaseQRankSum=0.000;ClippingRankSum=-0.000;DP=29300;ExcessHet=3.0798;FS=2.390;InbreedingCoeff=-0.0228;MLEAC=3;MLEAF=0.000612;MQ=29.97;MQRankSum=-0.135;QD=11.65;ReadPosRankSum=-0.000;SOR=1.584
chr21	8396969	7934	28S	A	G	1805.53	SNV	AC=5;AF=0.000998;AN=5008;BaseQRankSum=-0.106;ClippingRankSum=0.000;DP=117812;ExcessHet=3.0233;FS=0.000;InbreedingCoeff=-0.0012;MLEAC=5;MLEAF=0.000998;MQ=22.10;MQRankSum=0.400;QD=1.71;ReadPosRankSum=0.485;SOR=0.056
chr21	8258168	7971	28S	A	C	212.94	SNV	AC=27;AF=0.00563;AN=4798;BaseQRankSum=-0.842;ClippingRankSum=-0.000;DP=20834;ExcessHet=38.2567;FS=23.396;InbreedingCoeff=-0.1122;MLEAC=19;MLEAF=0.00396;MQ=17.45;MQRankSum=-0.253;QD=1.25;ReadPosRankSum=-0.113;SOR=1.975
chr21	8258178	7981	28S	A	C	70.2	SNV	AC=10;AF=0.00209;AN=4778;BaseQRankSum=-1.223;ClippingRankSum=-0.000;DP=20429;ExcessHet=33.5455;FS=115.179;InbreedingCoeff=-0.1181;MLEAC=10;MLEAF=0.00209;MQ=15.92;MQRankSum=1.352;QD=1.11;ReadPosRankSum=0.967;SOR=5.608
chr21	8258185	7988	28S	T	G	35.19	SNV	AC=14;AF=0.00294;AN=4760;BaseQRankSum=-0.988;ClippingRankSum=0.000;DP=17978;ExcessHet=32.8238;FS=71.089;InbreedingCoeff=-0.1214;MLEAC=5;MLEAF=0.00105;MQ=19.23;MQRankSum=0.674;QD=0.53;ReadPosRankSum=0.712;SOR=2.848
chr21	8397031	7996	28S	A	G,C	1219.7	SNV	AC=4,1;AF=0.000799,0.0002;AN=5008;BaseQRankSum=-0.368;ClippingRankSum=0.000;DP=114958;ExcessHet=3.0190;FS=0.000;InbreedingCoeff=-0.0009;MLEAC=4,1;MLEAF=0.000799,0.0002;MQ=22.21;MQRankSum=0.652;QD=1.25;ReadPosRankSum=0.102;SOR=0.035
chr21	8397033	7998	28S	A	G	1264.47	SNV	AC=3;AF=0.000599;AN=5008;BaseQRankSum=-1.479;ClippingRankSum=0.000;DP=113781;ExcessHet=3.0155;FS=0.000;InbreedingCoeff=-0.0008;MLEAC=3;MLEAF=0.000599;MQ=22.01;MQRankSum=0.571;QD=2.35;ReadPosRankSum=0.545;SOR=0.071
chr21	8258229	8032	28S	A	C	36.67	SNV	AC=9;AF=0.00195;AN=4608;BaseQRankSum=-0.431;ClippingRankSum=-0.000;DP=11352;ExcessHet=6.6249;FS=12.111;InbreedingCoeff=-0.0993;MLEAC=8;MLEAF=0.00174;MQ=16.04;MQRankSum=-0.000;QD=0.71;ReadPosRankSum=0.253;SOR=2.613
chr21	8397088	8053	28S	A	G	673.79	SNV	AC=4;AF=0.0008;AN=5002;BaseQRankSum=0.860;ClippingRankSum=0.000;DP=84631;ExcessHet=3.0286;FS=0.000;InbreedingCoeff=-0.0034;MLEAC=3;MLEAF=0.0006;MQ=22.38;MQRankSum=0.000;QD=3.40;ReadPosRankSum=-0.104;SOR=0.128
chr21	8397093	8058	28S	C	G	523.97	SNV	AC=6;AF=0.0012;AN=5000;BaseQRankSum=0.550;ClippingRankSum=0.000;DP=72895;ExcessHet=3.0286;FS=0.000;InbreedingCoeff=-0.0057;MLEAC=5;MLEAF=0.001;MQ=22.19;MQRankSum=0.026;QD=2.32;ReadPosRankSum=-0.705;SOR=0.088
chr21	8214130	8142	28S	A	G	448.05	SNV	AC=10;AF=0.00287;AN=3488;BaseQRankSum=-0.000;ClippingRankSum=-0.000;DP=5282;ExcessHet=0.1887;FS=0.000;InbreedingCoeff=-0.1066;MLEAC=13;MLEAF=0.00373;MQ=21.44;MQRankSum=-0.524;QD=9.33;ReadPosRankSum=-0.000;SOR=0.240
chr21	8258351	8154	28S	A	G	1266.88	SNV	AC=51;AF=0.0113;AN=4518;BaseQRankSum=-0.000;ClippingRankSum=-0.000;DP=8287;ExcessHet=0.0000;FS=10.978;InbreedingCoeff=-0.0690;MLEAC=56;MLEAF=0.0124;MQ=19.05;MQRankSum=-0.000;QD=5.15;ReadPosRankSum=-0.000;SOR=2.560
chr21	8214244	8256	28S	TCAA	CCAA,T	1455.74	SNV	AC=4,2;AF=0.000799,0.0004;AN=5004;BaseQRankSum=0.000;ClippingRankSum=0.000;DP=61101;ExcessHet=3.0234;FS=0.000;InbreedingCoeff=0.0009;MLEAC=4,2;MLEAF=0.000799,0.0004;MQ=37.04;MQRankSum=-0.653;QD=8.41;ReadPosRankSum=0.928;SOR=0.191
chr21	8214257	8269	28S	T	C	999.2	SNV	AC=4;AF=0.000799;AN=5006;BaseQRankSum=-2.218;ClippingRankSum=0.000;DP=70024;ExcessHet=3.1752;FS=0.000;InbreedingCoeff=-0.0054;MLEAC=4;MLEAF=0.000799;MQ=35.69;MQRankSum=0.040;QD=6.49;ReadPosRankSum=-0.301;SOR=0.034
chr21	8214258	8270	28S	A	G	948.89	SNV	AC=7;AF=0.0014;AN=5006;BaseQRankSum=0.507;ClippingRankSum=0.000;DP=70601;ExcessHet=3.0494;FS=0.000;InbreedingCoeff=-0.0031;MLEAC=5;MLEAF=0.000999;MQ=33.99;MQRankSum=0.359;QD=2.77;ReadPosRankSum=0.929;SOR=0.049
chr21	8214282	8294	28S	AAG	A,AAGAG,AAGAGAG	3906.53	INDEL	AC=25,1,1;AF=0.00499,0.0002,0.0002;AN=5008;BaseQRankSum=0.577;ClippingRankSum=0.000;DP=83493;ExcessHet=3.3185;FS=0.000;InbreedingCoeff=-0.0007;MLEAC=24,1,1;MLEAF=0.00479,0.0002,0.0002;MQ=34.57;MQRankSum=1.166;QD=3.69;ReadPosRankSum=0.154;SOR=0.042
chr21	8214284	8296	28S	G	GA,*	3410.67	SNV	AC=2,25;AF=0.000399,0.00499;AN=5008;BaseQRankSum=0.535;ClippingRankSum=0.000;DP=84708;ExcessHet=3.3187;FS=0.000;InbreedingCoeff=-0.0038;MLEAC=2,24;MLEAF=0.000399,0.00479;MQ=13.74;MQRankSum=0.142;QD=3.05;ReadPosRankSum=-0.438;SOR=0.036
chr21	8214307	8319	28S	A	G	940.72	SNV	AC=3;AF=0.000599;AN=5008;BaseQRankSum=0.742;ClippingRankSum=0.000;DP=90655;ExcessHet=3.0129;FS=0.000;InbreedingCoeff=-0.0008;MLEAC=2;MLEAF=0.000399;MQ=35.32;MQRankSum=-1.294;QD=4.63;ReadPosRankSum=-0.394;SOR=0.104
chr21	8214330	8342	28S	G	C	1400.49	SNV	AC=4;AF=0.000799;AN=5008;BaseQRankSum=0.000;ClippingRankSum=0.000;DP=94858;ExcessHet=3.0155;FS=0.000;InbreedingCoeff=-0.0009;MLEAC=4;MLEAF=0.000799;MQ=36.22;MQRankSum=-2.231;QD=4.01;ReadPosRankSum=-0.062;SOR=0.078
chr21	8214334	8346	28S	C	T	1497.83	SNV	AC=3;AF=0.000599;AN=5008;BaseQRankSum=0.000;ClippingRankSum=0.000;DP=95584;ExcessHet=3.0155;FS=0.000;InbreedingCoeff=-0.0008;MLEAC=2;MLEAF=0.000399;MQ=37.68;MQRankSum=-2.581;QD=12.28;ReadPosRankSum=0.231;SOR=0.601
chr21	8214336	8348	28S	C	T	69.44	SNV	AC=3;AF=0.000599;AN=5008;BaseQRankSum=0.000;ClippingRankSum=0.000;DP=95781;ExcessHet=3.0190;FS=0.000;InbreedingCoeff=-0.0009;MLEAC=2;MLEAF=0.000399;MQ=35.52;MQRankSum=2.283;QD=0.53;ReadPosRankSum=1.353;SOR=0.025
chr21	8214344	8356	28S	G	T	1105.54	SNV	AC=5;AF=0.000998;AN=5008;BaseQRankSum=0.762;ClippingRankSum=0.000;DP=97069;ExcessHet=3.0190;FS=0.000;InbreedingCoeff=-0.0010;MLEAC=5;MLEAF=0.000998;MQ=34.73;MQRankSum=2.172;QD=1.92;ReadPosRankSum=0.183;SOR=0.030
chr21	8214347	8359	28S	C	T	249.14	SNV	AC=4;AF=0.000799;AN=5008;BaseQRankSum=0.000;ClippingRankSum=0.000;DP=97372;ExcessHet=3.0155;FS=0.000;InbreedingCoeff=-0.0009;MLEAC=3;MLEAF=0.000599;MQ=35.42;MQRankSum=1.789;QD=1.48;ReadPosRankSum=1.124;SOR=0.035
chr21	8214360	8372	28S	CCGGCGGCGGGTCCGGCCGTGT	C,GCGGCGGCGGGTCCGGCCGTGT	1086.45	INDEL	AC=2,1;AF=0.000399,0.0002;AN=5008;BaseQRankSum=0.416;ClippingRankSum=0.000;DP=98549;ExcessHet=3.0129;FS=0.000;InbreedingCoeff=-0.0006;MLEAC=2,1;MLEAF=0.000399,0.0002;MQ=35.83;MQRankSum=2.457;QD=2.46;ReadPosRankSum=0.236;SOR=0.018
chr21	8214361	8373	28S	C	G,*	1634.33	SNV	AC=2,2;AF=0.000399,0.000399;AN=5008;BaseQRankSum=0.000;ClippingRankSum=0.000;DP=98929;ExcessHet=3.0155;FS=0.000;InbreedingCoeff=-0.0008;MLEAC=2,2;MLEAF=0.000399,0.000399;MQ=24.84;MQRankSum=-0.022;QD=2.17;ReadPosRankSum=0.427;SOR=0.021
chr21	8214364	8376	28S	C	T,*	1416.87	SNV	AC=5,2;AF=0.000998,0.000399;AN=5008;BaseQRankSum=0.000;ClippingRankSum=0.000;DP=99442;ExcessHet=3.0346;FS=0.000;InbreedingCoeff=-0.0012;MLEAC=5,2;MLEAF=0.000998,0.000399;MQ=26.46;MQRankSum=1.098;QD=1.85;ReadPosRankSum=-0.037;SOR=0.022
chr21	8214365	8377	28S	G	T,*	6673.4	SNV	AC=8,2;AF=0.0016,0.000399;AN=5008;BaseQRankSum=0.694;ClippingRankSum=0.000;DP=100330;ExcessHet=3.0494;FS=0.000;InbreedingCoeff=-0.0020;MLEAC=8,2;MLEAF=0.0016,0.000399;MQ=31.50;MQRankSum=1.151;QD=4.08;ReadPosRankSum=0.372;SOR=0.066
chr21	8214367	8379	28S	C	T,*	1024.39	SNV	AC=3,2;AF=0.000599,0.000399;AN=5008;BaseQRankSum=0.462;ClippingRankSum=0.000;DP=100736;ExcessHet=3.0190;FS=0.000;InbreedingCoeff=-0.0010;MLEAC=3,2;MLEAF=0.000599,0.000399;MQ=20.90;MQRankSum=2.479;QD=1.72;ReadPosRankSum=-0.489;SOR=0.016
chr21	8214371	8383	28S	TCCGGCCGTGTCGGCGGC	T,*	1173.39	INDEL	AC=1,2;AF=0.0002,0.000399;AN=5008;BaseQRankSum=1.189;ClippingRankSum=0.000;DP=101393;ExcessHet=3.0129;FS=0.000;InbreedingCoeff=-0.0006;MLEAC=1,2;MLEAF=0.0002,0.000399;MQ=13.65;MQRankSum=-1.834;QD=2.57;ReadPosRankSum=-2.068;SOR=0.023
chr21	8214373	8385	28S	C	T,*	1691.49	SNV	AC=1,3;AF=0.0002,0.000599;AN=5008;BaseQRankSum=0.828;ClippingRankSum=0.000;DP=101615;ExcessHet=3.0155;FS=0.000;InbreedingCoeff=-0.0008;MLEAC=1,3;MLEAF=0.0002,0.000599;MQ=16.89;MQRankSum=-5.151;QD=2.65;ReadPosRankSum=0.311;SOR=0.023
chr21	8214374	8386	28S	G	A,*	1991.49	SNV	AC=1,3;AF=0.0002,0.000599;AN=5008;BaseQRankSum=0.677;ClippingRankSum=0.000;DP=101857;ExcessHet=3.0155;FS=0.000;InbreedingCoeff=-0.0008;MLEAC=1,3;MLEAF=0.0002,0.000599;MQ=22.69;MQRankSum=5.087;QD=2.50;ReadPosRankSum=0.552;SOR=0.024
chr21	8214377	8389	28S	C	T,*	1430.49	SNV	AC=1,3;AF=0.0002,0.000599;AN=5008;BaseQRankSum=0.463;ClippingRankSum=0.000;DP=102109;ExcessHet=3.0155;FS=0.000;InbreedingCoeff=-0.0008;MLEAC=1,3;MLEAF=0.0002,0.000599;MQ=14.40;MQRankSum=-4.417;QD=2.49;ReadPosRankSum=0.602;SOR=0.020
chr21	8214378	8390	28S	G	A,*	1273.51	SNV	AC=1,3;AF=0.0002,0.000599;AN=5008;BaseQRankSum=-1.476;ClippingRankSum=0.000;DP=102012;ExcessHet=3.0155;FS=0.000;InbreedingCoeff=-0.0007;MLEAC=1,3;MLEAF=0.0002,0.000599;MQ=6.65;MQRankSum=0.640;QD=2.66;ReadPosRankSum=0.057;SOR=0.019
chr21	8214382	8394	28S	C	T	1796.5	SNV	AC=4;AF=0.000799;AN=5008;BaseQRankSum=-1.165;ClippingRankSum=0.000;DP=107227;ExcessHet=3.0155;FS=0.000;InbreedingCoeff=-0.0008;MLEAC=4;MLEAF=0.000799;MQ=33.52;MQRankSum=-6.302;QD=3.09;ReadPosRankSum=-0.671;SOR=0.061
chr21	8214385	8397	28S	C	T,*	1817.78	SNV	AC=3,1;AF=0.000599,0.0002;AN=5008;BaseQRankSum=-1.039;ClippingRankSum=0.000;DP=107363;ExcessHet=3.0155;FS=0.000;InbreedingCoeff=-0.0007;MLEAC=3,1;MLEAF=0.000599,0.0002;MQ=33.17;MQRankSum=2.740;QD=3.93;ReadPosRankSum=0.829;SOR=0.069
chr21	8214393	8405	28S	C	T	281.83	SNV	AC=3;AF=0.000599;AN=5008;BaseQRankSum=0.000;ClippingRankSum=0.000;DP=107913;ExcessHet=3.0233;FS=0.000;InbreedingCoeff=-0.0009;MLEAC=2;MLEAF=0.000399;MQ=34.74;MQRankSum=-0.492;QD=1.24;ReadPosRankSum=0.034;SOR=0.027
chr21	8214405	8417	28S	G	GC	8125.64	SNV	AC=9;AF=0.0018;AN=5008;BaseQRankSum=0.522;ClippingRankSum=0.000;DP=110165;ExcessHet=3.0416;FS=0.000;InbreedingCoeff=-0.0018;MLEAC=8;MLEAF=0.0016;MQ=36.16;MQRankSum=2.377;QD=4.46;ReadPosRankSum=-0.076;SOR=0.093
chr21	8214417	8429	28S	T	C	1227.74	SNV	AC=6;AF=0.0012;AN=5008;BaseQRankSum=0.861;ClippingRankSum=0.000;DP=111159;ExcessHet=3.0285;FS=0.000;InbreedingCoeff=-0.0013;MLEAC=6;MLEAF=0.0012;MQ=35.84;MQRankSum=0.878;QD=2.02;ReadPosRankSum=-0.097;SOR=0.035
chr21	8214451	8463	28S	C	T	1393.45	SNV	AC=3;AF=0.000599;AN=5008;BaseQRankSum=-1.516;ClippingRankSum=0.000;DP=113494;ExcessHet=3.0129;FS=0.000;InbreedingCoeff=-0.0006;MLEAC=3;MLEAF=0.000599;MQ=36.87;MQRankSum=2.760;QD=4.60;ReadPosRankSum=-0.729;SOR=0.091
chr21	8214454	8466	28S	CCCT	C,CCCTCCT,TCCT,*	29852.1	INDEL	AC=44,2,1,1;AF=0.00879,0.000399,0.0002,0.0002;AN=5008;BaseQRankSum=0.000;ClippingRankSum=0.000;DP=117519;ExcessHet=3.9991;FS=0.000;InbreedingCoeff=-0.0091;MLEAC=44,1,1,1;MLEAF=0.00879,0.0002,0.0002,0.0002;MQ=34.94;MQRankSum=-0.152;QD=5.67;ReadPosRankSum=-0.311;SOR=0.064
chr21	8214457	8469	28S	T	G,*	22413.9	SNV	AC=2,45;AF=0.000399,0.00899;AN=5008;BaseQRankSum=-2.991;ClippingRankSum=0.000;DP=121066;ExcessHet=3.9685;FS=0.000;InbreedingCoeff=-0.0073;MLEAC=2,45;MLEAF=0.000399,0.00899;MQ=6.94;MQRankSum=-0.496;QD=4.53;ReadPosRankSum=-0.237;SOR=0.042
chr21	8214460	8472	28S	T	C	39407.3	SNV	AC=69;AF=0.0138;AN=5008;BaseQRankSum=1.265;ClippingRankSum=0.000;DP=125639;ExcessHet=6.5169;FS=0.000;InbreedingCoeff=-0.0168;MLEAC=68;MLEAF=0.0136;MQ=35.61;MQRankSum=-1.114;QD=5.25;ReadPosRankSum=-0.068;SOR=0.088
chr21	8214463	8475	28S	T	C	6157.52	SNV	AC=9;AF=0.0018;AN=5008;BaseQRankSum=1.743;ClippingRankSum=0.000;DP=121786;ExcessHet=3.0676;FS=0.000;InbreedingCoeff=-0.0022;MLEAC=9;MLEAF=0.0018;MQ=35.09;MQRankSum=1.099;QD=3.50;ReadPosRankSum=0.368;SOR=0.058
chr21	8214482	8494	28S	G	GCT,T,*	20884.6	SNV	AC=3,16,1;AF=0.000599,0.00319,0.0002;AN=5008;BaseQRankSum=-0.715;ClippingRankSum=0.000;DP=130097;ExcessHet=3.1761;FS=0.000;InbreedingCoeff=-0.0030;MLEAC=3,16,1;MLEAF=0.000599,0.00319,0.0002;MQ=35.42;MQRankSum=1.021;QD=6.07;ReadPosRankSum=-0.491;SOR=0.454
chr21	8214493	8505	28S	TGCGGGGGTGGGCGG	GGCGGGGGTGGGCGG,T	12352.8	SNV	AC=4,4;AF=0.000799,0.000799;AN=5008;BaseQRankSum=-2.613;ClippingRankSum=0.000;DP=138133;ExcessHet=3.0355;FS=0.000;InbreedingCoeff=0.0050;MLEAC=4,4;MLEAF=0.000799,0.000799;MQ=35.27;MQRankSum=0.259;QD=8.90;ReadPosRankSum=-0.065;SOR=0.116
chr21	8214494	8506	28S	G	C,*	10455.8	SNV	AC=4,4;AF=0.000799,0.000799;AN=5008;BaseQRankSum=-1.173;ClippingRankSum=0.000;DP=132146;ExcessHet=3.0346;FS=0.000;InbreedingCoeff=-0.0016;MLEAC=4,4;MLEAF=0.000799,0.000799;MQ=25.28;MQRankSum=-2.056;QD=7.65;ReadPosRankSum=0.065;SOR=0.523
chr21	8214495	8507	28S	CGGGG	C,TGGGG,*	4201.87	INDEL	AC=1,2,4;AF=0.0002,0.000399,0.000799;AN=5008;BaseQRankSum=-0.819;ClippingRankSum=0.000;DP=132116;ExcessHet=3.0285;FS=0.000;InbreedingCoeff=-0.0011;MLEAC=1,2,4;MLEAF=0.0002,0.000399,0.000799;MQ=24.86;MQRankSum=-0.403;QD=3.44;ReadPosRankSum=0.116;SOR=0.409
chr21	8214496	8508	28S	G	C,*	4113.31	SNV	AC=1,5;AF=0.0002,0.000998;AN=5008;BaseQRankSum=-0.602;ClippingRankSum=0.000;DP=131871;ExcessHet=3.0233;FS=0.000;InbreedingCoeff=-0.0011;MLEAC=1,5;MLEAF=0.0002,0.000998;MQ=13.19;MQRankSum=1.749;QD=4.54;ReadPosRankSum=-1.144;SOR=0.453
chr21	8214497	8509	28S	GGGGT	G,*	7737.32	INDEL	AC=4,5;AF=0.000799,0.000998;AN=5008;BaseQRankSum=0.502;ClippingRankSum=0.000;DP=132546;ExcessHet=3.0416;FS=0.000;InbreedingCoeff=-0.0018;MLEAC=4,5;MLEAF=0.000799,0.000998;MQ=28.58;MQRankSum=1.436;QD=5.61;ReadPosRankSum=0.708;SOR=1.174
chr21	8214499	8511	28S	G	T,*	8142.4	SNV	AC=1,9;AF=0.0002,0.0018;AN=5008;BaseQRankSum=-2.377;ClippingRankSum=0.000;DP=132582;ExcessHet=3.0494;FS=0.000;InbreedingCoeff=-0.0020;MLEAC=1,9;MLEAF=0.0002,0.0018;MQ=6.89;MQRankSum=-1.796;QD=5.55;ReadPosRankSum=-0.588;SOR=1.583
chr21	8214501	8513	28S	T	C,G,*	15544.3	SNV	AC=7,2,7;AF=0.0014,0.000399,0.0014;AN=5008;BaseQRankSum=-1.078;ClippingRankSum=0.000;DP=135655;ExcessHet=3.1170;FS=0.000;InbreedingCoeff=0.0056;MLEAC=7,2,7;MLEAF=0.0014,0.000399,0.0014;MQ=24.76;MQRankSum=-0.123;QD=6.99;ReadPosRankSum=0.039;SOR=0.648
chr21	8214505	8517	28S	CGGGCGGGGCCGG	TGGGCGGGGCCGG,C,*	5627.7	INDEL	AC=3,3,4;AF=0.000599,0.000599,0.000799;AN=5008;BaseQRankSum=0.730;ClippingRankSum=0.000;DP=131186;ExcessHet=3.0494;FS=0.000;InbreedingCoeff=-0.0014;MLEAC=2,3,4;MLEAF=0.000399,0.000599,0.000799;MQ=24.51;MQRankSum=-1.833;QD=3.74;ReadPosRankSum=0.251;SOR=0.383
chr21	8214506	8518	28S	GGGCGGGGCCGGGGGTGGGGTC	G,*	5330.73	INDEL	AC=1,6;AF=0.0002,0.0012;AN=5008;BaseQRankSum=0.868;ClippingRankSum=0.000;DP=130725;ExcessHet=3.0285;FS=0.000;InbreedingCoeff=-0.0013;MLEAC=1,6;MLEAF=0.0002,0.0012;MQ=8.77;MQRankSum=-2.483;QD=4.80;ReadPosRankSum=0.798;SOR=1.755
chr21	8214509	8521	28S	C	T,*	2276.3	SNV	AC=2,4;AF=0.000399,0.000799;AN=5008;BaseQRankSum=-2.160;ClippingRankSum=0.000;DP=130284;ExcessHet=3.0233;FS=0.000;InbreedingCoeff=-0.0012;MLEAC=2,4;MLEAF=0.000399,0.000799;MQ=20.91;MQRankSum=-2.775;QD=2.80;ReadPosRankSum=-0.093;SOR=0.160
chr21	8214514	8526	28S	C	T,*	2332.59	SNV	AC=2,5;AF=0.000399,0.000998;AN=5008;BaseQRankSum=0.742;ClippingRankSum=0.000;DP=130257;ExcessHet=3.0285;FS=0.000;InbreedingCoeff=-0.0014;MLEAC=1,5;MLEAF=0.0002,0.000998;MQ=15.79;MQRankSum=4.048;QD=3.01;ReadPosRankSum=-0.293;SOR=2.123
chr21	8214526	8538	28S	T	C,*	452.39	SNV	AC=2,1;AF=0.000399,0.0002;AN=5008;BaseQRankSum=0.470;ClippingRankSum=0.000;DP=130271;ExcessHet=3.0129;FS=0.000;InbreedingCoeff=0.0007;MLEAC=2,1;MLEAF=0.000399,0.0002;MQ=31.03;MQRankSum=-0.175;QD=1.71;ReadPosRankSum=1.315;SOR=0.339
chr21	8214530	8542	28S	C	T	1876.45	SNV	AC=3;AF=0.000599;AN=5008;BaseQRankSum=-0.067;ClippingRankSum=0.000;DP=129373;ExcessHet=3.0129;FS=0.000;InbreedingCoeff=-0.0006;MLEAC=3;MLEAF=0.000599;MQ=35.14;MQRankSum=2.197;QD=4.19;ReadPosRankSum=-0.081;SOR=1.128
chr21	8214536	8548	28S	ACCGTCCC	A,*	972.51	INDEL	AC=2,1;AF=0.000399,0.0002;AN=5008;BaseQRankSum=-1.687;ClippingRankSum=0.000;DP=131892;ExcessHet=3.0130;FS=0.000;InbreedingCoeff=0.0033;MLEAC=2,1;MLEAF=0.000399,0.0002;MQ=32.13;MQRankSum=0.632;QD=4.68;ReadPosRankSum=-0.082;SOR=0.678
chr21	8214541	8553	28S	C	A,*	1095.24	SNV	AC=1,3;AF=0.0002,0.000599;AN=5008;BaseQRankSum=-3.144;ClippingRankSum=0.000;DP=123979;ExcessHet=3.0155;FS=2.252;InbreedingCoeff=-0.0008;MLEAC=1,3;MLEAF=0.0002,0.000599;MQ=22.02;MQRankSum=3.143;QD=3.05;ReadPosRankSum=0.314;SOR=1.205
chr21	8214547	8559	28S	A	G	2670.65	SNV	AC=5;AF=0.000998;AN=5008;BaseQRankSum=0.780;ClippingRankSum=0.000;DP=123859;ExcessHet=3.0493;FS=0.000;InbreedingCoeff=-0.0019;MLEAC=5;MLEAF=0.000998;MQ=36.01;MQRankSum=0.259;QD=3.36;ReadPosRankSum=0.347;SOR=0.168
chr21	8214564	8576	28S	G	A	132.5	SNV	AC=3;AF=0.000599;AN=5008;BaseQRankSum=-1.299;ClippingRankSum=0.000;DP=120650;ExcessHet=3.0155;FS=0.000;InbreedingCoeff=-0.0007;MLEAC=3;MLEAF=0.000599;MQ=34.35;MQRankSum=0.918;QD=0.97;ReadPosRankSum=-1.058;SOR=0.509
chr21	8214583	8595	28S	C	T	1507.46	SNV	AC=3;AF=0.000599;AN=5008;BaseQRankSum=-1.271;ClippingRankSum=0.000;DP=118027;ExcessHet=3.0155;FS=0.000;InbreedingCoeff=-0.0007;MLEAC=3;MLEAF=0.000599;MQ=34.22;MQRankSum=-0.457;QD=4.60;ReadPosRankSum=-0.726;SOR=0.365
chr21	8214628	8640	28S	C	CG,T	4887.81	SNV	AC=13,3;AF=0.0026,0.000599;AN=5008;BaseQRankSum=-0.164;ClippingRankSum=0.000;DP=140616;ExcessHet=3.1150;FS=2.664;InbreedingCoeff=-0.0026;MLEAC=13,1;MLEAF=0.0026,0.0002;MQ=40.97;MQRankSum=0.487;QD=3.32;ReadPosRankSum=0.030;SOR=0.479
chr21	8397685	8650	28S	G	A	245.61	SNV	AC=4;AF=0.0152;AN=264;DP=200;ExcessHet=0.0001;FS=0.000;InbreedingCoeff=-0.0962;MLEAC=3;MLEAF=0.0114;MQ=12.73;QD=35.09;SOR=1.609
chr21	8214642	8654	28S	C	CG,T	3322.92	SNV	AC=2,3;AF=0.000399,0.000599;AN=5008;BaseQRankSum=0.295;ClippingRankSum=0.000;DP=223842;ExcessHet=3.0193;FS=0.663;InbreedingCoeff=0.0046;MLEAC=2,2;MLEAF=0.000399,0.000399;MQ=40.08;MQRankSum=0.918;QD=6.61;ReadPosRankSum=0.646;SOR=0.616
chr21	8214649	8661	28S	CCCCGTCCG	TCCCGTCCG,CTCCG,C	12669.9	INDEL	AC=1,7,2;AF=0.0002,0.0014,0.000399;AN=5008;BaseQRankSum=0.069;ClippingRankSum=0.000;DP=235297;ExcessHet=3.0495;FS=0.000;InbreedingCoeff=-0.0006;MLEAC=1,6,1;MLEAF=0.0002,0.0012,0.0002;MQ=46.26;MQRankSum=1.269;QD=5.28;ReadPosRankSum=0.455;SOR=0.749
chr21	8214650	8662	28S	CCCGTCCGTCCGT	CCCGT,CCCGTCCGT,CCCGTCCGTCCGTCCGT,C,CTCCGTCCGT,*	1.94544e+06	INDEL	AC=127,1601,46,2,1,3;AF=0.0254,0.32,0.00919,0.000399,0.0002,0.000599;AN=5008;BaseQRankSum=0.232;ClippingRankSum=0.000;DP=446102;ExcessHet=2242.1932;FS=0.000;InbreedingCoeff=-0.5365;MLEAC=125,1607,46,2,1,3;MLEAF=0.025,0.321,0.00919,0.000399,0.0002,0.000599;MQ=45.24;MQRankSum=0.233;QD=6.06;ReadPosRankSum=0.328;SOR=0.750
chr21	8214651	8663	28S	CCG	C,*	1.89837e+06	INDEL	AC=1,1730;AF=0.0002,0.345;AN=5008;BaseQRankSum=0.528;ClippingRankSum=0.000;DP=449628;ExcessHet=2174.2385;FS=0.000;InbreedingCoeff=-0.5287;MLEAC=1,1749;MLEAF=0.0002,0.349;MQ=0.92;MQRankSum=1.456;QD=6.23;ReadPosRankSum=0.850;SOR=0.750
chr21	8214652	8664	28S	C	T,*	1.89816e+06	SNV	AC=1,1730;AF=0.0002,0.345;AN=5008;BaseQRankSum=0.312;ClippingRankSum=0.000;DP=457229;ExcessHet=2199.2125;FS=0.000;InbreedingCoeff=-0.5297;MLEAC=1,1761;MLEAF=0.0002,0.352;MQ=1.17;MQRankSum=0.383;QD=6.23;ReadPosRankSum=0.298;SOR=0.750
chr21	8214653	8665	28S	G	A,*	1.89566e+06	SNV	AC=3,1726;AF=0.000599,0.345;AN=5008;BaseQRankSum=0.753;ClippingRankSum=0.000;DP=460442;ExcessHet=2162.7806;FS=0.000;InbreedingCoeff=-0.5275;MLEAC=2,1744;MLEAF=0.000399,0.348;MQ=1.86;MQRankSum=-2.340;QD=6.23;ReadPosRankSum=-0.739;SOR=0.750
chr21	8214654	8666	28S	TCCGTCC	TCGTCC,T,*	1.89512e+06	INDEL	AC=1,1,1726;AF=0.0002,0.0002,0.345;AN=5006;BaseQRankSum=-1.912;ClippingRankSum=0.000;DP=504611;ExcessHet=2605.6456;FS=0.000;InbreedingCoeff=-0.5209;MLEAC=1,1,1795;MLEAF=0.0002,0.0002,0.359;MQ=1.35;MQRankSum=1.394;QD=6.23;ReadPosRankSum=0.110;SOR=0.750
chr21	8214656	8668	28S	C	T,*	955526	SNV	AC=2,573;AF=0.000399,0.114;AN=5008;BaseQRankSum=-0.798;ClippingRankSum=0.000;DP=540784;ExcessHet=165.1937;FS=0.554;InbreedingCoeff=-0.1289;MLEAC=2,570;MLEAF=0.000399,0.114;MQ=3.05;MQRankSum=0.581;QD=7.98;ReadPosRankSum=0.861;SOR=0.746
chr21	8214661	8673	28S	GTCCGTCCGTCC	G,ATCCGTCCGTCC,*	48575.7	INDEL	AC=7,4,15;AF=0.0014,0.000799,0.003;AN=5008;BaseQRankSum=-0.056;ClippingRankSum=0.000;DP=572986;ExcessHet=3.2937;FS=2.634;InbreedingCoeff=-0.0049;MLEAC=4,3,15;MLEAF=0.000799,0.000599,0.003;MQ=25.31;MQRankSum=0.328;QD=8.74;ReadPosRankSum=0.444;SOR=0.911
chr21	8214663	8675	28S	C	A,*	10213.6	SNV	AC=1,8;AF=0.0002,0.0016;AN=5008;BaseQRankSum=0.601;ClippingRankSum=0.000;DP=577151;ExcessHet=3.0416;FS=6.533;InbreedingCoeff=-0.0014;MLEAC=1,5;MLEAF=0.0002,0.000998;MQ=8.87;MQRankSum=2.279;QD=6.80;ReadPosRankSum=0.644;SOR=1.236
chr21	8214664	8676	28S	C	T,*	10428.6	SNV	AC=1,8;AF=0.0002,0.0016;AN=5008;BaseQRankSum=-0.551;ClippingRankSum=0.000;DP=577023;ExcessHet=3.0416;FS=5.517;InbreedingCoeff=-0.0015;MLEAC=1,5;MLEAF=0.0002,0.000998;MQ=21.14;MQRankSum=0.568;QD=6.31;ReadPosRankSum=0.693;SOR=1.195
chr21	8258873	8676	28S	CCCGT	C,CCCGTCCGT	2367.14	INDEL	AC=22,4;AF=0.0162,0.00294;AN=1362;BaseQRankSum=-0.000;ClippingRankSum=-0.000;DP=1558;ExcessHet=0.0000;FS=8.886;InbreedingCoeff=0.1354;MLEAC=19,3;MLEAF=0.014,0.0022;MQ=22.98;MQRankSum=-0.524;QD=26.01;ReadPosRankSum=0.842;SOR=3.258
chr21	8214665	8677	28S	GTCCGTCC	G,*	280419	INDEL	AC=122,3;AF=0.0244,0.000599;AN=5008;BaseQRankSum=0.313;ClippingRankSum=0.000;DP=581006;ExcessHet=4.3083;FS=0.584;InbreedingCoeff=-0.0092;MLEAC=119,2;MLEAF=0.0238,0.000399;MQ=45.51;MQRankSum=0.494;QD=10.65;ReadPosRankSum=1.623;SOR=0.810
chr21	8214668	8680	28S	CG	C,TG,*	281854	INDEL	AC=20,1,124;AF=0.00399,0.0002,0.0248;AN=5008;BaseQRankSum=0.983;ClippingRankSum=0.000;DP=588161;ExcessHet=6.1503;FS=0.600;InbreedingCoeff=-0.0122;MLEAC=18,1,119;MLEAF=0.00359,0.0002,0.0238;MQ=18.79;MQRankSum=-0.290;QD=9.30;ReadPosRankSum=2.205;SOR=0.778
chr21	8214669	8681	28S	GTCC	G,GTCCTCC,ATCC,*	699292	INDEL	AC=310,52,1,119;AF=0.0619,0.0104,0.0002,0.0238;AN=5008;BaseQRankSum=0.391;ClippingRankSum=0.000;DP=598709;ExcessHet=101.0189;FS=0.000;InbreedingCoeff=-0.0957;MLEAC=308,49,1,115;MLEAF=0.0615,0.00978,0.0002,0.023;MQ=40.03;MQRankSum=-1.170;QD=6.42;ReadPosRankSum=0.719;SOR=0.674
chr21	8214672	8684	28S	C	CG,G,CGTCCG,*	925568	SNV	AC=248,3,2,316;AF=0.0495,0.000599,0.000399,0.0631;AN=5008;BaseQRankSum=-0.824;ClippingRankSum=0.000;DP=629726;ExcessHet=152.1914;FS=0.625;InbreedingCoeff=-0.1055;MLEAC=246,2,1,314;MLEAF=0.0491,0.000399,0.0002,0.0627;MQ=30.41;MQRankSum=1.261;QD=7.03;ReadPosRankSum=1.767;SOR=0.640
chr21	8214675	8687	28S	C	T,*	37542.4	SNV	AC=1,8;AF=0.0002,0.0016;AN=5008;BaseQRankSum=-6.205;ClippingRankSum=0.000;DP=700537;ExcessHet=3.0416;FS=1.840;InbreedingCoeff=-0.0018;MLEAC=1,8;MLEAF=0.0002,0.0016;MQ=12.31;MQRankSum=3.902;QD=11.22;ReadPosRankSum=-1.394;SOR=0.536
chr21	8214676	8688	28S	TCCTCCCCCG	TCCTCCCCCTCCCCCG,T,*	18951.6	INDEL	AC=2,4,2;AF=0.000399,0.000799,0.000399;AN=5008;BaseQRankSum=-0.346;ClippingRankSum=0.000;DP=702265;ExcessHet=3.0349;FS=1.351;InbreedingCoeff=0.0030;MLEAC=2,4,2;MLEAF=0.000399,0.000799,0.000399;MQ=31.56;MQRankSum=0.135;QD=7.00;ReadPosRankSum=-0.748;SOR=0.889
chr21	8214677	8689	28S	CCT	C,*	16174	INDEL	AC=5,6;AF=0.000998,0.0012;AN=5008;BaseQRankSum=0.339;ClippingRankSum=0.000;DP=702754;ExcessHet=3.0581;FS=0.000;InbreedingCoeff=-0.0022;MLEAC=4,6;MLEAF=0.000799,0.0012;MQ=29.14;MQRankSum=-0.741;QD=5.06;ReadPosRankSum=2.766;SOR=0.712
chr21	8214679	8691	28S	T	TC,*	80737.3	SNV	AC=59,9;AF=0.0118,0.0018;AN=5008;BaseQRankSum=-0.645;ClippingRankSum=0.000;DP=724284;ExcessHet=5.3095;FS=0.679;InbreedingCoeff=0.0027;MLEAC=58,8;MLEAF=0.0116,0.0016;MQ=39.64;MQRankSum=-2.025;QD=4.25;ReadPosRankSum=1.456;SOR=0.788
chr21	8258892	8695	28S	GTCC	G	873.31	INDEL	AC=10;AF=0.0054;AN=1852;BaseQRankSum=0.000;ClippingRankSum=0.000;DP=2626;ExcessHet=0.0000;FS=0.000;InbreedingCoeff=-0.0854;MLEAC=12;MLEAF=0.00648;MQ=18.27;MQRankSum=-0.000;QD=19.85;ReadPosRankSum=1.036;SOR=0.952
chr21	8214684	8696	28S	C	G,*	17428.3	SNV	AC=7,6;AF=0.0014,0.0012;AN=5008;BaseQRankSum=0.796;ClippingRankSum=0.000;DP=732975;ExcessHet=3.0782;FS=1.342;InbreedingCoeff=-0.0024;MLEAC=7,5;MLEAF=0.0014,0.000998;MQ=32.19;MQRankSum=1.502;QD=6.24;ReadPosRankSum=-0.554;SOR=0.837
chr21	8214686	8698	28S	T	C,*	1329.8	SNV	AC=1,2;AF=0.0002,0.0004;AN=5006;BaseQRankSum=-1.512;ClippingRankSum=0.000;DP=734361;ExcessHet=3.0129;FS=0.000;InbreedingCoeff=-0.0002;MLEAC=1,1;MLEAF=0.0002,0.0002;MQ=32.58;MQRankSum=-0.050;QD=2.12;ReadPosRankSum=-0.323;SOR=0.596
chr21	8258895	8698	28S	C	CG,*	1083.22	SNV	AC=1,9;AF=0.000494,0.00444;AN=2026;BaseQRankSum=0.674;ClippingRankSum=-0.000;DP=2802;ExcessHet=0.0000;FS=0.000;InbreedingCoeff=0.1101;MLEAC=1,8;MLEAF=0.000494,0.00395;MQ=8.54;MQRankSum=-0.000;QD=24.62;ReadPosRankSum=-0.524;SOR=1.051
chr21	8214688	8700	28S	TCCGCCCC	T,*	398.92	INDEL	AC=1,2;AF=0.0002,0.000399;AN=5008;BaseQRankSum=-0.696;ClippingRankSum=0.000;DP=735585;ExcessHet=3.0129;FS=0.829;InbreedingCoeff=0.0002;MLEAC=1,1;MLEAF=0.0002,0.0002;MQ=28.09;MQRankSum=-0.085;QD=0.83;ReadPosRankSum=0.160;SOR=0.474
chr21	8214691	8703	28S	GC	GCC,TC,G,*	25419.2	SNV	AC=17,2,2,3;AF=0.00339,0.000399,0.000399,0.000599;AN=5008;BaseQRankSum=0.333;ClippingRankSum=0.000;DP=735806;ExcessHet=3.2511;FS=0.697;InbreedingCoeff=-0.0040;MLEAC=14,2,2,2;MLEAF=0.0028,0.000399,0.000399,0.000399;MQ=40.85;MQRankSum=1.581;QD=3.67;ReadPosRankSum=0.789;SOR=0.591
chr21	8214692	8704	28S	C	T,G,A,*	44014.9	SNV	AC=15,1,3,5;AF=0.003,0.0002,0.000599,0.000999;AN=5006;BaseQRankSum=-4.186;ClippingRankSum=0.000;DP=738967;ExcessHet=3.2528;FS=1.308;InbreedingCoeff=-0.0008;MLEAC=15,1,3,4;MLEAF=0.003,0.0002,0.000599,0.000799;MQ=39.07;MQRankSum=-4.131;QD=5.14;ReadPosRankSum=-0.620;SOR=0.589
chr21	8214693	8705	28S	C	G,*	757.3	SNV	AC=3,1;AF=0.000599,0.0002;AN=5006;BaseQRankSum=0.549;ClippingRankSum=0.000;DP=740450;ExcessHet=3.0155;FS=11.917;InbreedingCoeff=-0.0007;MLEAC=2,1;MLEAF=0.0004,0.0002;MQ=33.97;MQRankSum=1.036;QD=1.05;ReadPosRankSum=-0.111;SOR=0.256
chr21	8214696	8708	28S	CCGGCCCCGCGTCCTCCCTCGGGAGGGCGCG	TCGGCCCCGCGTCCTCCCTCGGGAGGGCGCG,GCGGCCCCGCGTCCTCCCTCGGGAGGGCGCG,C	6776.52	SNV	AC=1,2,1;AF=0.0002,0.000399,0.0002;AN=5008;BaseQRankSum=0.119;ClippingRankSum=0.000;DP=740826;ExcessHet=3.0155;FS=1.421;InbreedingCoeff=-0.0006;MLEAC=1,2,1;MLEAF=0.0002,0.000399,0.0002;MQ=45.41;MQRankSum=0.662;QD=5.36;ReadPosRankSum=1.890;SOR=0.855
chr21	8214706	8718	28S	G	T,A,*	6377.5	SNV	AC=3,1,1;AF=0.000599,0.0002,0.0002;AN=5008;BaseQRankSum=-0.313;ClippingRankSum=0.000;DP=741229;ExcessHet=3.0190;FS=0.610;InbreedingCoeff=-0.0010;MLEAC=3,1,1;MLEAF=0.000599,0.0002,0.0002;MQ=41.76;MQRankSum=2.402;QD=6.05;ReadPosRankSum=1.258;SOR=0.631
chr21	8214725	8737	28S	C	T,*	3268.49	SNV	AC=2,2;AF=0.000399,0.000399;AN=5008;BaseQRankSum=-0.246;ClippingRankSum=0.000;DP=745669;ExcessHet=3.0155;FS=0.000;InbreedingCoeff=-0.0008;MLEAC=2,2;MLEAF=0.000399,0.000399;MQ=24.21;MQRankSum=-2.000;QD=3.61;ReadPosRankSum=-0.124;SOR=0.749
chr21	8214726	8738	28S	GCGGGT	G,*	7076.23	INDEL	AC=4,2;AF=0.000799,0.000399;AN=5008;BaseQRankSum=0.565;ClippingRankSum=0.000;DP=746099;ExcessHet=3.0233;FS=0.880;InbreedingCoeff=-0.0012;MLEAC=4,2;MLEAF=0.000799,0.000399;MQ=33.19;MQRankSum=-3.874;QD=3.43;ReadPosRankSum=0.148;SOR=0.929
chr21	8214727	8739	28S	C	T,*	12733.9	SNV	AC=2,5;AF=0.000399,0.000998;AN=5008;BaseQRankSum=0.981;ClippingRankSum=0.000;DP=746238;ExcessHet=3.0285;FS=3.686;InbreedingCoeff=-0.0013;MLEAC=2,5;MLEAF=0.000399,0.000998;MQ=17.20;MQRankSum=-1.847;QD=5.60;ReadPosRankSum=1.151;SOR=1.082
chr21	8214728	8740	28S	G	T,*	7860.77	SNV	AC=2,5;AF=0.000399,0.000998;AN=5008;BaseQRankSum=-3.470;ClippingRankSum=0.000;DP=746718;ExcessHet=3.0285;FS=3.079;InbreedingCoeff=-0.0014;MLEAC=2,5;MLEAF=0.000399,0.000998;MQ=19.92;MQRankSum=0.184;QD=3.51;ReadPosRankSum=1.560;SOR=1.053
chr21	8214729	8741	28S	GGTCGGGGC	G,*	7046.23	INDEL	AC=3,3;AF=0.000599,0.000599;AN=5008;BaseQRankSum=1.919;ClippingRankSum=0.000;DP=746856;ExcessHet=3.0233;FS=6.576;InbreedingCoeff=-0.0012;MLEAC=3,3;MLEAF=0.000599,0.000599;MQ=26.57;MQRankSum=-6.692;QD=2.83;ReadPosRankSum=1.810;SOR=1.608
chr21	8214731	8743	28S	TCGGGGCGGCGGCGGC	CCGGGGCGGCGGCGGC,T,*	9661.13	INDEL	AC=1,1,6;AF=0.0002,0.0002,0.0012;AN=5008;BaseQRankSum=-2.001;ClippingRankSum=0.000;DP=747779;ExcessHet=3.0347;FS=3.130;InbreedingCoeff=-0.0008;MLEAC=1,1,6;MLEAF=0.0002,0.0002,0.0012;MQ=22.31;MQRankSum=0.137;QD=2.92;ReadPosRankSum=-0.495;SOR=1.150
chr21	8214732	8744	28S	CGGGGCGGCGGCGGCG	CGCGGCGGCGGCG,C,*	20774.9	INDEL	AC=5,3,5;AF=0.000998,0.000599,0.000998;AN=5008;BaseQRankSum=1.205;ClippingRankSum=0.000;DP=748529;ExcessHet=3.0785;FS=6.299;InbreedingCoeff=-0.0005;MLEAC=5,3,5;MLEAF=0.000998,0.000599,0.000998;MQ=31.14;MQRankSum=-4.000;QD=4.32;ReadPosRankSum=0.552;SOR=1.414
chr21	8214734	8746	28S	GGGCGGCGGCGGCGGTGGCGGCGGCGGCGGC	GGGCGGCGGCGGTGGCGGCGGCGGCGGC,GGGCGGCGGTGGCGGCGGCGGCGGC,GGGCGGCGGCGGCGGCGGTGGCGGCGGCGGCGGC,GGGCGGCGGCGGC,GGGCGGCGGCGGCGGC,GGGCGGTGGCGGCGGCGGCGGC,GGGCGGCGGC,GGGTGGCGGCGGCGGCGGC,GGGCGGC,CGGCGGCGGCGGCGGTGGCGGCGGCGGCGGC,GGGC,G,*	1.83158e+06	INDEL	AC=712,63,50,29,93,22,9,6,8,2,1,5,6;AF=0.142,0.0126,0.00998,0.00579,0.0186,0.00439,0.0018,0.0012,0.0016,0.000399,0.0002,0.000998,0.0012;AN=5008;BaseQRankSum=0.412;ClippingRankSum=0.000;DP=828517;ExcessHet=565.9307;FS=2.282;InbreedingCoeff=-0.2169;MLEAC=709,61,47,28,90,21,9,5,8,2,1,5,6;MLEAF=0.142,0.0122,0.00938,0.00559,0.018,0.00419,0.0018,0.000998,0.0016,0.000399,0.0002,0.000998,0.0012;MQ=42.24;…
chr21	8214735	8747	28S	G	T,*	1.81061e+06	SNV	AC=1,949;AF=0.0002,0.189;AN=5008;BaseQRankSum=-0.791;ClippingRankSum=0.000;DP=829913;ExcessHet=515.0882;FS=2.283;InbreedingCoeff=-0.2289;MLEAC=1,965;MLEAF=0.0002,0.193;MQ=1.44;MQRankSum=-2.292;QD=5.93;ReadPosRankSum=-2.312;SOR=0.970
chr21	8214737	8749	28S	CGGCGGCGGCGGT	C,*	1.87487e+06	INDEL	AC=144,879;AF=0.0288,0.176;AN=5008;BaseQRankSum=0.347;ClippingRankSum=0.000;DP=842071;ExcessHet=620.6330;FS=3.291;InbreedingCoeff=-0.2516;MLEAC=139,881;MLEAF=0.0278,0.176;MQ=15.18;MQRankSum=-4.367;QD=5.65;ReadPosRankSum=1.736;SOR=1.002
chr21	8214740	8752	28S	CGGCGGCGGT	C,TGGCGGCGGT,GGGCGGCGGT,*	1.80655e+06	INDEL	AC=149,3,1,794;AF=0.0298,0.000599,0.0002,0.159;AN=5008;BaseQRankSum=0.446;ClippingRankSum=0.000;DP=860456;ExcessHet=506.1071;FS=3.291;InbreedingCoeff=-0.2176;MLEAC=148,2,1,792;MLEAF=0.0296,0.000399,0.0002,0.158;MQ=16.91;MQRankSum=-4.966;QD=5.66;ReadPosRankSum=1.647;SOR=1.053
chr21	8214743	8755	28S	CGGCGGT	C,TGGCGGT,CGT,*	1.90569e+06	INDEL	AC=197,11,2,788;AF=0.0393,0.0022,0.000399,0.157;AN=5008;BaseQRankSum=0.144;ClippingRankSum=0.000;DP=876171;ExcessHet=595.1542;FS=4.439;InbreedingCoeff=-0.2211;MLEAC=196,9,2,790;MLEAF=0.0391,0.0018,0.000399,0.158;MQ=18.99;MQRankSum=-5.259;QD=5.50;ReadPosRankSum=1.580;SOR=1.054
chr21	8214746	8758	28S	CGGT	C,TGGT,*	2.57226e+06	INDEL	AC=469,101,721;AF=0.0937,0.0202,0.144;AN=5008;BaseQRankSum=0.031;ClippingRankSum=0.000;DP=896799;ExcessHet=1134.6474;FS=4.439;InbreedingCoeff=-0.3275;MLEAC=467,99,726;MLEAF=0.0933,0.0198,0.145;MQ=26.72;MQRankSum=-4.983;QD=5.75;ReadPosRankSum=1.953;SOR=1.075
chr21	8214747	8759	28S	GGT	G,*	2.35205e+06	INDEL	AC=3,1185;AF=0.000599,0.237;AN=5006;BaseQRankSum=0.652;ClippingRankSum=0.000;DP=901880;ExcessHet=923.8893;FS=3.292;InbreedingCoeff=-0.3065;MLEAC=3,1236;MLEAF=0.000599,0.247;MQ=0.68;MQRankSum=-2.824;QD=5.77;ReadPosRankSum=1.931;SOR=1.076
chr21	8214748	8760	28S	GT	G,*	2.37265e+06	INDEL	AC=4,1201;AF=0.000799,0.24;AN=5008;BaseQRankSum=0.871;ClippingRankSum=0.000;DP=899882;ExcessHet=943.8099;FS=4.455;InbreedingCoeff=-0.3124;MLEAC=1,1232;MLEAF=0.0002,0.246;MQ=1.64;MQRankSum=-1.662;QD=5.72;ReadPosRankSum=2.663;SOR=1.076
chr21	8258957	8760	28S	G	GGGC	2598.47	INDEL	AC=17;AF=0.00711;AN=2390;BaseQRankSum=-0.000;ClippingRankSum=-0.000;DP=7299;ExcessHet=0.0000;FS=2.570;InbreedingCoeff=-0.0656;MLEAC=13;MLEAF=0.00544;MQ=22.24;MQRankSum=-0.566;QD=26.79;ReadPosRankSum=0.745;SOR=1.814
chr21	8214749	8761	28S	TGGCGGCGGC	TGGC,TGGCGGC,CGGCGGCGGC,T,TGGCGGCGGCGGC,GGGCGGCGGC,TGGCGGCGGCGGCGGC,*	4.27632e+06	SNV	AC=137,318,870,5,20,5,6,493;AF=0.0274,0.0635,0.174,0.000998,0.00399,0.000998,0.0012,0.0984;AN=5008;BaseQRankSum=0.909;ClippingRankSum=0.000;DP=924895;ExcessHet=2956.4703;FS=2.171;InbreedingCoeff=-0.5390;MLEAC=136,317,870,5,19,5,6,493;MLEAF=0.0272,0.0633,0.174,0.000998,0.00379,0.000998,0.0012,0.0984;MQ=35.70;MQRankSum=-1.576;QD=7.15;ReadPosRankSum=0.354;SOR=0.938
chr21	8214750	8762	28S	GGCGGCGGCGGCGGC	G,*	1.36101e+06	INDEL	AC=4,773;AF=0.000816,0.158;AN=4904;BaseQRankSum=0.056;ClippingRankSum=0.000;DP=922162;ExcessHet=364.2119;FS=2.077;InbreedingCoeff=-0.1650;MLEAC=1,813;MLEAF=0.000204,0.166;MQ=1.45;MQRankSum=-5.109;QD=6.63;ReadPosRankSum=2.630;SOR=0.902
chr21	8214752	8764	28S	C	T,*	2.12494e+06	SNV	AC=505,577;AF=0.101,0.115;AN=5008;BaseQRankSum=-1.680;ClippingRankSum=0.000;DP=831244;ExcessHet=634.4100;FS=2.221;InbreedingCoeff=-0.2685;MLEAC=498,575;MLEAF=0.0994,0.115;MQ=24.44;MQRankSum=-2.204;QD=6.50;ReadPosRankSum=1.578;SOR=0.939
chr21	8214754	8766	28S	GC	G,*	958290	SNV	AC=4,488;AF=0.000799,0.0974;AN=5008;BaseQRankSum=-1.361;ClippingRankSum=0.000;DP=793291;ExcessHet=104.3832;FS=2.118;InbreedingCoeff=-0.1028;MLEAC=1,484;MLEAF=0.0002,0.0966;MQ=2.07;MQRankSum=1.162;QD=7.00;ReadPosRankSum=-0.302;SOR=0.879
chr21	8214755	8767	28S	C	T,G,CGGT,*	1.42342e+06	SNV	AC=252,1,3,456;AF=0.0503,0.0002,0.000599,0.0911;AN=5008;BaseQRankSum=-1.894;ClippingRankSum=0.000;DP=782557;ExcessHet=243.9596;FS=2.120;InbreedingCoeff=-0.1542;MLEAC=242,1,3,453;MLEAF=0.0483,0.0002,0.000599,0.0905;MQ=19.87;MQRankSum=-4.937;QD=6.83;ReadPosRankSum=2.091;SOR=0.929
chr21	8214756	8768	28S	GGCGGCGGC	G,CGCGGCGGC,*	250686	INDEL	AC=2,1,105;AF=0.0004,0.0002,0.021;AN=4996;BaseQRankSum=1.516;ClippingRankSum=0.000;DP=716692;ExcessHet=3.1611;FS=1.320;InbreedingCoeff=0.0086;MLEAC=1,1,104;MLEAF=0.0002,0.0002,0.0208;MQ=3.33;MQRankSum=-3.601;QD=6.95;ReadPosRankSum=4.147;SOR=0.901
chr21	8214757	8769	28S	GC	G,TC,*	283709	INDEL	AC=2,3,125;AF=0.000399,0.000599,0.025;AN=5008;BaseQRankSum=-0.807;ClippingRankSum=0.000;DP=697521;ExcessHet=4.6358;FS=2.125;InbreedingCoeff=-0.0102;MLEAC=1,3,123;MLEAF=0.0002,0.000599,0.0246;MQ=6.06;MQRankSum=3.451;QD=6.89;ReadPosRankSum=0.606;SOR=0.903
chr21	8258966	8769	28S	C	CGGT	542.37	INDEL	AC=5;AF=0.00192;AN=2606;BaseQRankSum=-0.000;ClippingRankSum=-0.000;DP=7443;ExcessHet=0.0002;FS=2.340;InbreedingCoeff=-0.0842;MLEAC=3;MLEAF=0.00115;MQ=12.08;MQRankSum=1.282;QD=33.90;ReadPosRankSum=-1.282;SOR=1.668
chr21	8214758	8770	28S	C	T,CGGT,*	460867	SNV	AC=32,23,119;AF=0.00639,0.00459,0.0238;AN=5008;BaseQRankSum=-0.831;ClippingRankSum=0.000;DP=694894;ExcessHet=9.3680;FS=2.126;InbreedingCoeff=-0.0232;MLEAC=31,23,117;MLEAF=0.00619,0.00459,0.0234;MQ=23.11;MQRankSum=-3.781;QD=7.25;ReadPosRankSum=1.629;SOR=0.953
chr21	8214759	8771	28S	GGCGGC	G,AGCGGC,*	77401.9	INDEL	AC=1,2,38;AF=0.0002,0.0004,0.00759;AN=5004;BaseQRankSum=-0.826;ClippingRankSum=0.000;DP=683313;ExcessHet=3.7363;FS=3.037;InbreedingCoeff=-0.0037;MLEAC=1,2,37;MLEAF=0.0002,0.0004,0.00739;MQ=10.07;MQRankSum=3.487;QD=6.28;ReadPosRankSum=0.714;SOR=0.954
chr21	8214760	8772	28S	GC	TC,G,GCGTC,GCGGCGTC,*	863410	INDEL	AC=231,3,118,1,26;AF=0.0461,0.000599,0.0236,0.0002,0.00519;AN=5008;BaseQRankSum=-0.877;ClippingRankSum=0.000;DP=643623;ExcessHet=71.1255;FS=1.371;InbreedingCoeff=-0.0783;MLEAC=230,3,117,1,26;MLEAF=0.0459,0.000599,0.0234,0.0002,0.00519;MQ=41.48;MQRankSum=0.084;QD=6.76;ReadPosRankSum=-0.480;SOR=0.866
chr21	8258969	8772	28S	C	T	412.23	SNV	AC=7;AF=0.0026;AN=2694;BaseQRankSum=-0.236;ClippingRankSum=0.000;DP=7533;ExcessHet=0.0009;FS=1.760;InbreedingCoeff=-0.0877;MLEAC=6;MLEAF=0.00223;MQ=15.70;MQRankSum=1.150;QD=12.49;ReadPosRankSum=0.809;SOR=1.135
chr21	8214761	8773	28S	C	T,A,*	98968.2	SNV	AC=7,5,32;AF=0.0014,0.001,0.0064;AN=4998;BaseQRankSum=-0.535;ClippingRankSum=0.000;DP=619009;ExcessHet=3.8719;FS=1.393;InbreedingCoeff=0.0053;MLEAC=7,5,32;MLEAF=0.0014,0.001,0.0064;MQ=19.54;MQRankSum=-1.181;QD=6.95;ReadPosRankSum=1.137;SOR=0.846
chr21	8214762	8774	28S	GGC	G,*	13313.5	INDEL	AC=3,12;AF=0.000599,0.0024;AN=5008;BaseQRankSum=-0.923;ClippingRankSum=0.000;DP=598725;ExcessHet=3.1017;FS=3.504;InbreedingCoeff=-0.0028;MLEAC=3,11;MLEAF=0.000599,0.0022;MQ=19.30;MQRankSum=-0.054;QD=4.05;ReadPosRankSum=-0.744;SOR=1.111
chr21	8214764	8776	28S	C	G,CGGG,T,CGGGGGCGGCGGG,*	986799	SNV	AC=440,2,1,1,12;AF=0.0879,0.000399,0.0002,0.0002,0.0024;AN=5008;BaseQRankSum=0.570;ClippingRankSum=0.000;DP=556833;ExcessHet=103.2008;FS=0.644;InbreedingCoeff=-0.0948;MLEAC=439,2,1,1,11;MLEAF=0.0877,0.000399,0.0002,0.0002,0.0022;MQ=44.49;MQRankSum=1.161;QD=6.72;ReadPosRankSum=-0.105;SOR=0.611
chr21	8258975	8778	28S	C	T	528.92	SNV	AC=3;AF=0.00115;AN=2614;BaseQRankSum=-0.000;ClippingRankSum=-0.000;DP=7441;ExcessHet=0.0130;FS=0.000;InbreedingCoeff=-0.0878;MLEAC=2;MLEAF=0.000765;MQ=23.86;MQRankSum=0.000;QD=52.89;ReadPosRankSum=0.992;SOR=0.318
chr21	8214767	8779	28S	C	T,*	6967.6	SNV	AC=3,1;AF=0.000599,0.0002;AN=5008;BaseQRankSum=0.424;ClippingRankSum=0.000;DP=465199;ExcessHet=3.0155;FS=0.000;InbreedingCoeff=-0.0005;MLEAC=3,1;MLEAF=0.000599,0.0002;MQ=32.50;MQRankSum=0.601;QD=7.00;ReadPosRankSum=0.105;SOR=0.672
chr21	8258978	8781	28S	TGGC	CGGC,TGGCGGC,T	9790.65	INDEL	AC=13,24,31;AF=0.00546,0.0101,0.013;AN=2380;BaseQRankSum=-0.431;ClippingRankSum=-0.000;DP=7251;ExcessHet=0.0000;FS=4.894;InbreedingCoeff=0.3136;MLEAC=10,19,26;MLEAF=0.0042,0.00798,0.0109;MQ=31.93;MQRankSum=-0.241;QD=21.71;ReadPosRankSum=0.398;SOR=2.416
chr21	8214770	8782	28S	C	T,*	3637.82	SNV	AC=2,1;AF=0.000399,0.0002;AN=5008;BaseQRankSum=-1.621;ClippingRankSum=0.000;DP=463183;ExcessHet=3.0129;FS=1.232;InbreedingCoeff=-0.0002;MLEAC=2,1;MLEAF=0.000399,0.0002;MQ=26.83;MQRankSum=1.649;QD=10.79;ReadPosRankSum=-0.336;SOR=0.572
chr21	8214771	8783	28S	G	A,T,*	7042.5	SNV	AC=3,1,1;AF=0.000599,0.0002,0.0002;AN=5008;BaseQRankSum=-1.017;ClippingRankSum=0.000;DP=462608;ExcessHet=3.0190;FS=0.000;InbreedingCoeff=-0.0010;MLEAC=3,1,1;MLEAF=0.000599,0.0002,0.0002;MQ=31.77;MQRankSum=-1.865;QD=5.97;ReadPosRankSum=0.485;SOR=0.666
chr21	8258981	8784	28S	C	T,*	3264.38	SNV	AC=5,30;AF=0.00189,0.0113;AN=2650;BaseQRankSum=-0.765;ClippingRankSum=0.000;DP=7435;ExcessHet=0.0000;FS=9.824;InbreedingCoeff=0.1239;MLEAC=4,26;MLEAF=0.00151,0.00981;MQ=13.55;MQRankSum=-1.158;QD=13.43;ReadPosRankSum=1.437;SOR=2.324
chr21	8214773	8785	28S	G	C,*	2101.02	SNV	AC=1,2;AF=0.0002,0.000399;AN=5008;BaseQRankSum=1.045;ClippingRankSum=0.000;DP=461015;ExcessHet=3.0129;FS=0.000;InbreedingCoeff=0.0021;MLEAC=1,2;MLEAF=0.0002,0.000399;MQ=9.90;MQRankSum=-4.530;QD=4.67;ReadPosRankSum=0.418;SOR=0.621
chr21	8214776	8788	28S	CG	C	16983	SNV	AC=21;AF=0.00419;AN=5008;BaseQRankSum=0.733;ClippingRankSum=0.000;DP=453632;ExcessHet=3.5884;FS=1.783;InbreedingCoeff=-0.0057;MLEAC=19;MLEAF=0.00379;MQ=42.57;MQRankSum=-1.350;QD=3.40;ReadPosRankSum=0.434;SOR=0.866
chr21	8214777	8789	28S	G	A,*	17607.7	SNV	AC=1,21;AF=0.0002,0.00419;AN=5008;BaseQRankSum=-3.118;ClippingRankSum=0.000;DP=453023;ExcessHet=3.2123;FS=0.847;InbreedingCoeff=-0.0036;MLEAC=1,19;MLEAF=0.0002,0.00379;MQ=15.05;MQRankSum=0.627;QD=3.28;ReadPosRankSum=-0.148;SOR=0.795
chr21	8214780	8792	28S	AC	A,ACC,ACCC	431407	INDEL	AC=66,190,5;AF=0.0132,0.0379,0.000998;AN=5008;BaseQRankSum=0.058;ClippingRankSum=0.000;DP=427286;ExcessHet=13.4046;FS=0.000;InbreedingCoeff=-0.0206;MLEAC=62,188,5;MLEAF=0.0124,0.0375,0.000998;MQ=44.43;MQRankSum=0.832;QD=6.44;ReadPosRankSum=0.068;SOR=0.702
chr21	8214781	8793	28S	CCCCCCCCGAGTGTTACAG	C,ACCCCCCCGAGTGTTACAG,*	98981.4	INDEL	AC=3,1,68;AF=0.000602,0.000201,0.0136;AN=4982;BaseQRankSum=0.301;ClippingRankSum=0.000;DP=430565;ExcessHet=5.4498;FS=0.000;InbreedingCoeff=0.0135;MLEAC=1,1,65;MLEAF=0.000201,0.000201,0.013;MQ=6.45;MQRankSum=0.561;QD=5.41;ReadPosRankSum=0.760;SOR=0.686
chr21	8214782	8794	28S	C	A,*	12328.5	SNV	AC=2,2;AF=0.0004,0.0004;AN=5006;BaseQRankSum=0.128;ClippingRankSum=0.000;DP=385557;ExcessHet=3.0157;FS=1.344;InbreedingCoeff=0.0038;MLEAC=2,2;MLEAF=0.0004,0.0004;MQ=28.17;MQRankSum=0.796;QD=8.92;ReadPosRankSum=-0.075;SOR=0.583
chr21	8258993	8796	28S	C	G	3209.64	SNV	AC=28;AF=0.00957;AN=2926;BaseQRankSum=-0.000;ClippingRankSum=-0.000;DP=7468;ExcessHet=0.0000;FS=31.478;InbreedingCoeff=-0.0604;MLEAC=33;MLEAF=0.0113;MQ=31.82;MQRankSum=-0.253;QD=15.43;ReadPosRankSum=0.114;SOR=5.275
chr21	8214787	8799	28S	C	A,G,*	2026.45	SNV	AC=1,1,1;AF=0.0002,0.0002,0.0002;AN=5008;BaseQRankSum=-1.536;ClippingRankSum=0.000;DP=363447;ExcessHet=3.0129;FS=1.726;InbreedingCoeff=-0.0006;MLEAC=1,1,1;MLEAF=0.0002,0.0002,0.0002;MQ=25.01;MQRankSum=4.801;QD=3.62;ReadPosRankSum=2.265;SOR=0.500
chr21	8214799	8811	28S	GC	GCC,G,*	575778	INDEL	AC=104,323,1;AF=0.0208,0.0645,0.0002;AN=5008;BaseQRankSum=0.369;ClippingRankSum=0.000;DP=317486;ExcessHet=92.0767;FS=0.647;InbreedingCoeff=-0.0849;MLEAC=103,322,1;MLEAF=0.0206,0.0643,0.0002;MQ=41.04;MQRankSum=-0.517;QD=6.33;ReadPosRankSum=0.216;SOR=0.825
chr21	8214801	8813	28S	C	T,*	22921.7	SNV	AC=3,3;AF=0.000604,0.000604;AN=4970;BaseQRankSum=-0.382;ClippingRankSum=0.000;DP=311025;ExcessHet=3.0257;FS=3.688;InbreedingCoeff=0.0252;MLEAC=3,3;MLEAF=0.000604,0.000604;MQ=10.18;MQRankSum=1.774;QD=14.92;ReadPosRankSum=0.167;SOR=0.423
chr21	8259028	8831	28S	G	GC	852.82	SNV	AC=7;AF=0.00292;AN=2400;BaseQRankSum=0.516;ClippingRankSum=0.000;DP=5895;ExcessHet=0.0003;FS=6.555;InbreedingCoeff=-0.0886;MLEAC=7;MLEAF=0.00292;MQ=27.37;MQRankSum=-0.366;QD=11.22;ReadPosRankSum=-0.000;SOR=2.592
chr21	8214863	8875	28S	TC	GC,T,TCC	5937.6	SNV	AC=1,5,1;AF=0.0002,0.000998,0.0002;AN=5008;BaseQRankSum=0.375;ClippingRankSum=0.000;DP=154710;ExcessHet=3.0291;FS=81.617;InbreedingCoeff=0.0119;MLEAC=1,5,1;MLEAF=0.0002,0.000998,0.0002;MQ=36.08;MQRankSum=0.091;QD=8.42;ReadPosRankSum=0.397;SOR=0.685
chr21	8214868	8880	28S	C	T	159.74	SNV	AC=3;AF=0.000599;AN=5008;BaseQRankSum=0.000;ClippingRankSum=0.000;DP=152137;ExcessHet=3.0155;FS=4.080;InbreedingCoeff=-0.0009;MLEAC=2;MLEAF=0.000399;MQ=35.62;MQRankSum=-0.898;QD=1.45;ReadPosRankSum=-0.969;SOR=1.314
chr21	8214876	8888	28S	C	T	852.48	SNV	AC=3;AF=0.000599;AN=5008;BaseQRankSum=-0.860;ClippingRankSum=0.000;DP=147440;ExcessHet=3.0190;FS=18.542;InbreedingCoeff=-0.0011;MLEAC=3;MLEAF=0.000599;MQ=34.22;MQRankSum=-1.458;QD=4.53;ReadPosRankSum=-0.343;SOR=0.064
chr21	8214881	8893	28S	ACCCCCGCGGGGAATCCCCCGCGAGGGGGGTCT	A,ACCCCCGCGGGGAATCCCCCGCGAGGGGGGTCTCCCCCGCGGGGAATCCCCCGCGAGGGGGGTCT,ACCCCCGCGAGGGGGGTCT	1703.5	INDEL	AC=1,1,1;AF=0.0002,0.0002,0.0002;AN=5008;BaseQRankSum=-1.940;ClippingRankSum=0.000;DP=148524;ExcessHet=3.0130;FS=0.000;InbreedingCoeff=0.0173;MLEAC=1,1,1;MLEAF=0.0002,0.0002,0.0002;MQ=35.83;MQRankSum=0.640;QD=10.45;ReadPosRankSum=0.000;SOR=0.666
chr21	8214883	8895	28S	C	T,*	2180.27	SNV	AC=10,2;AF=0.002,0.000399;AN=5008;BaseQRankSum=-0.855;ClippingRankSum=0.000;DP=148271;ExcessHet=3.0678;FS=0.000;InbreedingCoeff=-0.0018;MLEAC=8,2;MLEAF=0.0016,0.000399;MQ=29.57;MQRankSum=-1.119;QD=3.61;ReadPosRankSum=0.437;SOR=3.050
chr21	8214885	8897	28S	C	A,*	1370.48	SNV	AC=1,2;AF=0.0002,0.000399;AN=5008;BaseQRankSum=-3.454;ClippingRankSum=0.000;DP=148490;ExcessHet=3.0129;FS=62.729;InbreedingCoeff=-0.0003;MLEAC=1,2;MLEAF=0.0002,0.000399;MQ=22.35;MQRankSum=-2.479;QD=5.62;ReadPosRankSum=1.044;SOR=0.040
chr21	8214886	8898	28S	C	G,*	14655.5	SNV	AC=22,2;AF=0.00439,0.000399;AN=5008;BaseQRankSum=0.472;ClippingRankSum=0.000;DP=148162;ExcessHet=3.2516;FS=0.647;InbreedingCoeff=-0.0039;MLEAC=22,2;MLEAF=0.00439,0.000399;MQ=35.00;MQRankSum=1.600;QD=7.73;ReadPosRankSum=-0.074;SOR=0.802
chr21	8214890	8902	28S	G	T,*	1257.55	SNV	AC=2,2;AF=0.000399,0.000399;AN=5008;BaseQRankSum=0.595;ClippingRankSum=0.000;DP=150338;ExcessHet=3.0155;FS=6.585;InbreedingCoeff=-0.0004;MLEAC=2,2;MLEAF=0.000399,0.000399;MQ=18.05;MQRankSum=3.380;QD=5.07;ReadPosRankSum=0.109;SOR=1.970
chr21	8214893	8905	28S	A	G,*	3183.91	SNV	AC=9,2;AF=0.0018,0.000399;AN=5008;BaseQRankSum=-1.001;ClippingRankSum=0.000;DP=151668;ExcessHet=3.0583;FS=4.497;InbreedingCoeff=-0.0012;MLEAC=8,2;MLEAF=0.0016,0.000399;MQ=30.78;MQRankSum=1.066;QD=5.86;ReadPosRankSum=0.115;SOR=1.467
chr21	8214894	8906	28S	ATCCCCCGCGAGGGGGGTC	A,*	7023.58	INDEL	AC=6,2;AF=0.0012,0.000399;AN=5008;BaseQRankSum=-1.614;ClippingRankSum=0.000;DP=153327;ExcessHet=3.0349;FS=6.214;InbreedingCoeff=0.0009;MLEAC=6,2;MLEAF=0.0012,0.000399;MQ=34.54;MQRankSum=-0.435;QD=7.83;ReadPosRankSum=-0.248;SOR=1.642
chr21	8214896	8908	28S	C	G,*	6843.53	SNV	AC=3,8;AF=0.000599,0.0016;AN=5008;BaseQRankSum=0.369;ClippingRankSum=0.000;DP=158653;ExcessHet=3.0582;FS=14.854;InbreedingCoeff=-0.0018;MLEAC=3,7;MLEAF=0.000599,0.0014;MQ=16.15;MQRankSum=2.039;QD=6.30;ReadPosRankSum=0.872;SOR=2.908
chr21	8214898	8910	28S	C	T,*	7077.04	SNV	AC=5,7;AF=0.000998,0.0014;AN=5008;BaseQRankSum=0.431;ClippingRankSum=0.000;DP=158937;ExcessHet=3.0678;FS=19.382;InbreedingCoeff=-0.0022;MLEAC=5,7;MLEAF=0.000998,0.0014;MQ=16.35;MQRankSum=-1.894;QD=6.22;ReadPosRankSum=0.724;SOR=3.008
chr21	8214901	8913	28S	G	T,*	6777.89	SNV	AC=1,7;AF=0.0002,0.0014;AN=5008;BaseQRankSum=0.563;ClippingRankSum=0.000;DP=159432;ExcessHet=3.0346;FS=21.780;InbreedingCoeff=-0.0014;MLEAC=1,7;MLEAF=0.0002,0.0014;MQ=9.09;MQRankSum=2.556;QD=7.36;ReadPosRankSum=0.149;SOR=2.909
chr21	8214902	8914	28S	CGA	C,*	6802.19	INDEL	AC=1,7;AF=0.0002,0.0014;AN=5008;BaseQRankSum=0.065;ClippingRankSum=0.000;DP=159293;ExcessHet=3.0347;FS=17.732;InbreedingCoeff=-0.0006;MLEAC=1,7;MLEAF=0.0002,0.0014;MQ=12.12;MQRankSum=-1.995;QD=7.37;ReadPosRankSum=0.315;SOR=2.830
chr21	8214904	8916	28S	AG	AGG,A,AGGG,*	62617	SNV	AC=91,1,1,7;AF=0.0182,0.0002,0.0002,0.0014;AN=5008;BaseQRankSum=-0.289;ClippingRankSum=0.000;DP=163461;ExcessHet=7.5647;FS=191.460;InbreedingCoeff=0.0002;MLEAC=88,1,1,7;MLEAF=0.0176,0.0002,0.0002,0.0014;MQ=34.77;MQRankSum=-0.251;QD=7.41;ReadPosRankSum=0.838;SOR=3.056
chr21	8214905	8917	28S	G	A,*	3181.82	SNV	AC=2,8;AF=0.000401,0.0016;AN=4990;BaseQRankSum=-1.998;ClippingRankSum=0.000;DP=165924;ExcessHet=3.0510;FS=4.977;InbreedingCoeff=0.0090;MLEAC=2,7;MLEAF=0.000401,0.0014;MQ=7.50;MQRankSum=1.651;QD=3.97;ReadPosRankSum=0.765;SOR=2.432
chr21	8214908	8920	28S	G	T,*	6881.87	SNV	AC=1,8;AF=0.0002,0.0016;AN=5008;BaseQRankSum=-3.308;ClippingRankSum=0.000;DP=164446;ExcessHet=3.0416;FS=17.191;InbreedingCoeff=-0.0016;MLEAC=1,7;MLEAF=0.0002,0.0014;MQ=9.79;MQRankSum=1.678;QD=6.71;ReadPosRankSum=-0.592;SOR=3.119
chr21	8214909	8921	28S	G	T,*	6715.53	SNV	AC=2,8;AF=0.000399,0.0016;AN=5008;BaseQRankSum=-0.952;ClippingRankSum=0.000;DP=164534;ExcessHet=3.0494;FS=21.487;InbreedingCoeff=-0.0018;MLEAC=2,7;MLEAF=0.000399,0.0014;MQ=14.62;MQRankSum=1.500;QD=6.28;ReadPosRankSum=0.596;SOR=3.136
chr21	8214910	8922	28S	G	T,*	27026.6	SNV	AC=37,7;AF=0.00739,0.0014;AN=5008;BaseQRankSum=-0.909;ClippingRankSum=0.000;DP=165831;ExcessHet=3.8786;FS=11.586;InbreedingCoeff=-0.0084;MLEAC=37,7;MLEAF=0.00739,0.0014;MQ=31.38;MQRankSum=1.885;QD=6.04;ReadPosRankSum=0.543;SOR=4.186
chr21	8214911	8923	28S	TCTCCCCCGCGGGGGCGCGCCGG	T,*	9033.68	INDEL	AC=7,7;AF=0.0014,0.0014;AN=5008;BaseQRankSum=0.227;ClippingRankSum=0.000;DP=165987;ExcessHet=3.0901;FS=14.735;InbreedingCoeff=-0.0008;MLEAC=7,7;MLEAF=0.0014,0.0014;MQ=24.67;MQRankSum=0.993;QD=5.77;ReadPosRankSum=-0.424;SOR=3.422
chr21	8214913	8925	28S	T	G,*	3371.53	SNV	AC=7,8;AF=0.0014,0.0016;AN=5006;BaseQRankSum=-2.295;ClippingRankSum=0.000;DP=168617;ExcessHet=3.1067;FS=4.283;InbreedingCoeff=0.0066;MLEAC=4,8;MLEAF=0.000799,0.0016;MQ=24.71;MQRankSum=0.210;QD=3.07;ReadPosRankSum=-0.851;SOR=5.914
chr21	8214918	8930	28S	C	T,*	2620.52	SNV	AC=2,7;AF=0.000399,0.0014;AN=5008;BaseQRankSum=0.577;ClippingRankSum=0.000;DP=167120;ExcessHet=3.0416;FS=13.100;InbreedingCoeff=-0.0015;MLEAC=2,7;MLEAF=0.000399,0.0014;MQ=13.06;MQRankSum=1.304;QD=3.15;ReadPosRankSum=0.494;SOR=5.924
chr21	8214920	8932	28S	CGGGGGCGCGCCGGCGTCTCCTCGT	C,*	3028.88	INDEL	AC=2,7;AF=0.000399,0.0014;AN=5008;BaseQRankSum=0.482;ClippingRankSum=0.000;DP=167638;ExcessHet=3.0420;FS=6.376;InbreedingCoeff=0.0006;MLEAC=1,7;MLEAF=0.0002,0.0014;MQ=17.38;MQRankSum=2.032;QD=3.22;ReadPosRankSum=0.668;SOR=5.288
chr21	8214923	8935	28S	G	T,*	3174.78	SNV	AC=1,9;AF=0.0002,0.0018;AN=5008;BaseQRankSum=-1.461;ClippingRankSum=0.000;DP=168971;ExcessHet=3.0494;FS=6.539;InbreedingCoeff=-0.0019;MLEAC=1,8;MLEAF=0.0002,0.0016;MQ=12.06;MQRankSum=2.143;QD=3.09;ReadPosRankSum=-0.234;SOR=5.271
chr21	8214926	8938	28S	C	T,*	3216.62	SNV	AC=1,9;AF=0.0002,0.0018;AN=5008;BaseQRankSum=1.247;ClippingRankSum=0.000;DP=169152;ExcessHet=3.0494;FS=10.738;InbreedingCoeff=-0.0019;MLEAC=1,8;MLEAF=0.0002,0.0016;MQ=11.64;MQRankSum=1.157;QD=3.07;ReadPosRankSum=0.488;SOR=6.227
chr21	8214928	8940	28S	C	T,*	9266.25	SNV	AC=4,9;AF=0.000799,0.0018;AN=5008;BaseQRankSum=-1.786;ClippingRankSum=0.000;DP=169657;ExcessHet=3.0782;FS=6.945;InbreedingCoeff=-0.0025;MLEAC=4,8;MLEAF=0.000799,0.0016;MQ=23.25;MQRankSum=5.568;QD=5.50;ReadPosRankSum=0.611;SOR=6.540
chr21	8214931	8943	28S	C	T,*	4268.75	SNV	AC=2,9;AF=0.000399,0.0018;AN=5008;BaseQRankSum=-1.312;ClippingRankSum=0.000;DP=169481;ExcessHet=3.0581;FS=6.585;InbreedingCoeff=-0.0021;MLEAC=2,8;MLEAF=0.000399,0.0016;MQ=14.20;MQRankSum=1.999;QD=3.78;ReadPosRankSum=-0.140;SOR=5.587
chr21	8214933	8945	28S	G	T,*	3652.69	SNV	AC=1,9;AF=0.0002,0.0018;AN=5008;BaseQRankSum=-2.540;ClippingRankSum=0.000;DP=170043;ExcessHet=3.0494;FS=6.496;InbreedingCoeff=-0.0018;MLEAC=1,8;MLEAF=0.0002,0.0016;MQ=12.71;MQRankSum=1.797;QD=3.39;ReadPosRankSum=1.532;SOR=5.506
chr21	8214934	8946	28S	C	T,*	1557.06	SNV	AC=2,2;AF=0.000399,0.000399;AN=5008;BaseQRankSum=0.238;ClippingRankSum=0.000;DP=170097;ExcessHet=3.0155;FS=15.539;InbreedingCoeff=-0.0004;MLEAC=2,1;MLEAF=0.000399,0.0002;MQ=25.30;MQRankSum=1.177;QD=3.55;ReadPosRankSum=1.415;SOR=4.979
chr21	8214942	8954	28S	C	G,*	865.07	SNV	AC=1,2;AF=0.0002,0.000399;AN=5008;BaseQRankSum=2.002;ClippingRankSum=0.000;DP=175860;ExcessHet=3.0129;FS=0.000;InbreedingCoeff=-0.0005;MLEAC=1,1;MLEAF=0.0002,0.0002;MQ=12.94;MQRankSum=-3.058;QD=3.28;ReadPosRankSum=-1.644;SOR=0.163
chr21	8214943	8955	28S	G	C,*	701.15	SNV	AC=2,2;AF=0.000399,0.000399;AN=5008;BaseQRankSum=0.886;ClippingRankSum=0.000;DP=176216;ExcessHet=3.0155;FS=0.000;InbreedingCoeff=-0.0007;MLEAC=2,1;MLEAF=0.000399,0.0002;MQ=23.73;MQRankSum=1.741;QD=1.77;ReadPosRankSum=-0.288;SOR=0.454
chr21	8214944	8956	28S	T	TG,*	10189.3	SNV	AC=10,2;AF=0.002,0.000399;AN=5008;BaseQRankSum=-0.361;ClippingRankSum=0.000;DP=177964;ExcessHet=3.0686;FS=7.168;InbreedingCoeff=0.0008;MLEAC=10,1;MLEAF=0.002,0.0002;MQ=34.09;MQRankSum=0.848;QD=7.58;ReadPosRankSum=-1.073;SOR=2.469
chr21	8214978	8990	28S	C	G,T	6006.87	SNV	AC=2,4;AF=0.000399,0.000799;AN=5008;BaseQRankSum=-0.241;ClippingRankSum=0.000;DP=190838;ExcessHet=3.0233;FS=11.034;InbreedingCoeff=-0.0010;MLEAC=2,4;MLEAF=0.000399,0.000799;MQ=32.23;MQRankSum=1.485;QD=8.08;ReadPosRankSum=0.154;SOR=1.951
chr21	8214987	8999	28S	ACCCCTCCT	A,GCCCCTCCT	8339.79	INDEL	AC=5,4;AF=0.000998,0.000799;AN=5008;BaseQRankSum=-1.972;ClippingRankSum=0.000;DP=195380;ExcessHet=3.0426;FS=15.363;InbreedingCoeff=0.0037;MLEAC=5,4;MLEAF=0.000998,0.000799;MQ=35.73;MQRankSum=0.249;QD=7.94;ReadPosRankSum=0.787;SOR=3.410
chr21	8214988	9000	28S	C	CCCCTCCT,*	6005.93	SNV	AC=1,5;AF=0.0002,0.000998;AN=5008;BaseQRankSum=-0.361;ClippingRankSum=0.000;DP=194511;ExcessHet=3.0233;FS=58.483;InbreedingCoeff=-0.0011;MLEAC=1,5;MLEAF=0.0002,0.000998;MQ=8.57;MQRankSum=-0.915;QD=8.30;ReadPosRankSum=-0.793;SOR=9.098
chr21	8214995	9007	28S	T	G,*	5925.01	SNV	AC=30,5;AF=0.00599,0.000998;AN=5008;BaseQRankSum=-1.635;ClippingRankSum=0.000;DP=213513;ExcessHet=3.6595;FS=4.339;InbreedingCoeff=0.0184;MLEAC=14,5;MLEAF=0.0028,0.000998;MQ=34.19;MQRankSum=-0.320;QD=2.88;ReadPosRankSum=0.675;SOR=6.203
chr21	8215002	9014	28S	G	GC,*	4210.54	SNV	AC=9,1;AF=0.0018,0.0002;AN=5008;BaseQRankSum=0.480;ClippingRankSum=0.000;DP=173165;ExcessHet=3.0494;FS=8.642;InbreedingCoeff=-0.0019;MLEAC=8,1;MLEAF=0.0016,0.0002;MQ=33.11;MQRankSum=0.483;QD=2.96;ReadPosRankSum=0.593;SOR=6.637
chr21	8215018	9030	28S	CG	CGG,CGGG,C	24436.8	SNV	AC=31,4,8;AF=0.00619,0.000799,0.0016;AN=5008;BaseQRankSum=-0.515;ClippingRankSum=0.000;DP=170679;ExcessHet=3.8453;FS=3.817;InbreedingCoeff=-0.0044;MLEAC=28,4,7;MLEAF=0.00559,0.000799,0.0014;MQ=35.16;MQRankSum=0.148;QD=5.60;ReadPosRankSum=0.000;SOR=1.589
chr21	8215020	9032	28S	G	T	6022.58	SNV	AC=12;AF=0.0024;AN=5008;BaseQRankSum=-0.774;ClippingRankSum=0.000;DP=168298;ExcessHet=3.2297;FS=14.423;InbreedingCoeff=-0.0037;MLEAC=12;MLEAF=0.0024;MQ=35.04;MQRankSum=1.108;QD=6.86;ReadPosRankSum=0.042;SOR=0.128
chr21	8215023	9035	28S	G	T	100.98	SNV	AC=3;AF=0.000599;AN=5008;BaseQRankSum=-2.274;ClippingRankSum=0.000;DP=167182;ExcessHet=3.0129;FS=6.491;InbreedingCoeff=-0.0006;MLEAC=2;MLEAF=0.000399;MQ=33.54;MQRankSum=-0.064;QD=0.67;ReadPosRankSum=-0.218;SOR=0.146
chr21	8215024	9036	28S	G	T,C	1267.55	SNV	AC=2,2;AF=0.000399,0.000399;AN=5008;BaseQRankSum=-0.310;ClippingRankSum=0.000;DP=167313;ExcessHet=3.0155;FS=4.260;InbreedingCoeff=-0.0006;MLEAC=2,2;MLEAF=0.000399,0.000399;MQ=34.69;MQRankSum=0.337;QD=4.02;ReadPosRankSum=-0.330;SOR=0.444
chr21	8215029	9041	28S	C	G	2370.93	SNV	AC=8;AF=0.0016;AN=5008;BaseQRankSum=0.600;ClippingRankSum=0.000;DP=165638;ExcessHet=3.0581;FS=84.901;InbreedingCoeff=-0.0020;MLEAC=6;MLEAF=0.0012;MQ=34.49;MQRankSum=0.328;QD=2.78;ReadPosRankSum=0.430;SOR=0.077
chr21	8215041	9053	28S	CG	C,*	667.48	SNV	AC=2,1;AF=0.000399,0.0002;AN=5008;BaseQRankSum=-0.031;ClippingRankSum=0.000;DP=162786;ExcessHet=3.0129;FS=0.000;InbreedingCoeff=-0.0000;MLEAC=2,1;MLEAF=0.000399,0.0002;MQ=28.27;MQRankSum=-1.566;QD=4.09;ReadPosRankSum=1.411;SOR=0.836
chr21	8215042	9054	28S	G	T,*	917.25	SNV	AC=3,3;AF=0.000599,0.000599;AN=5008;BaseQRankSum=-2.163;ClippingRankSum=0.000;DP=162694;ExcessHet=3.0233;FS=0.000;InbreedingCoeff=-0.0010;MLEAC=2,3;MLEAF=0.000399,0.000599;MQ=23.37;MQRankSum=-0.925;QD=3.10;ReadPosRankSum=0.579;SOR=0.335
chr21	8215043	9055	28S	G	T,*	2106.74	SNV	AC=10,1;AF=0.002,0.0002;AN=5008;BaseQRankSum=-2.345;ClippingRankSum=0.000;DP=162907;ExcessHet=3.0583;FS=17.994;InbreedingCoeff=-0.0013;MLEAC=9,1;MLEAF=0.0018,0.0002;MQ=33.28;MQRankSum=0.488;QD=2.73;ReadPosRankSum=-0.032;SOR=4.914
chr21	8215053	9065	28S	C	T	3984.87	SNV	AC=7;AF=0.0014;AN=5008;BaseQRankSum=0.387;ClippingRankSum=0.000;DP=160022;ExcessHet=3.0346;FS=9.244;InbreedingCoeff=-0.0016;MLEAC=7;MLEAF=0.0014;MQ=35.34;MQRankSum=0.511;QD=5.69;ReadPosRankSum=0.105;SOR=0.218
chr21	8215056	9068	28S	A	T,G	1228.48	SNV	AC=2,1;AF=0.000399,0.0002;AN=5008;BaseQRankSum=0.986;ClippingRankSum=0.000;DP=159773;ExcessHet=3.0129;FS=25.010;InbreedingCoeff=-0.0004;MLEAC=2,1;MLEAF=0.000399,0.0002;MQ=33.86;MQRankSum=-0.912;QD=2.65;ReadPosRankSum=-1.806;SOR=4.181
chr21	8215069	9081	28S	C	T,A	487.69	SNV	AC=2,1;AF=0.000399,0.0002;AN=5008;BaseQRankSum=0.608;ClippingRankSum=0.000;DP=152704;ExcessHet=3.0129;FS=0.000;InbreedingCoeff=0.0003;MLEAC=1,1;MLEAF=0.0002,0.0002;MQ=35.11;MQRankSum=0.821;QD=1.30;ReadPosRankSum=1.012;SOR=0.641
chr21	8215071	9083	28S	C	T	2618.79	SNV	AC=4;AF=0.000799;AN=5008;BaseQRankSum=-0.248;ClippingRankSum=0.000;DP=152154;ExcessHet=3.0190;FS=27.608;InbreedingCoeff=-0.0022;MLEAC=4;MLEAF=0.000799;MQ=33.75;MQRankSum=-1.006;QD=5.24;ReadPosRankSum=-0.935;SOR=7.283
chr21	8215074	9086	28S	C	T,A	799.74	SNV	AC=2,1;AF=0.0004,0.0002;AN=5004;BaseQRankSum=0.459;ClippingRankSum=-0.000;DP=148418;ExcessHet=3.0129;FS=0.000;InbreedingCoeff=0.0013;MLEAC=2,1;MLEAF=0.0004,0.0002;MQ=31.22;MQRankSum=0.589;QD=4.76;ReadPosRankSum=0.047;SOR=0.589
chr21	8215082	9094	28S	T	A,*	591	SNV	AC=3,2;AF=0.000601,0.0004;AN=4994;BaseQRankSum=-2.484;ClippingRankSum=0.000;DP=141399;ExcessHet=3.0192;FS=0.000;InbreedingCoeff=0.0058;MLEAC=2,2;MLEAF=0.0004,0.0004;MQ=30.55;MQRankSum=-0.209;QD=4.28;ReadPosRankSum=0.334;SOR=0.439
chr21	8215083	9095	28S	C	G,*	473.06	SNV	AC=1,2;AF=0.0002,0.000401;AN=4992;BaseQRankSum=-0.084;ClippingRankSum=-0.000;DP=140187;ExcessHet=3.0129;FS=0.000;InbreedingCoeff=0.0046;MLEAC=1,2;MLEAF=0.0002,0.000401;MQ=11.03;MQRankSum=-0.171;QD=6.86;ReadPosRankSum=1.021;SOR=0.162
chr21	8215086	9098	28S	G	A,*	1241.8	SNV	AC=1,2;AF=0.000201,0.000402;AN=4970;BaseQRankSum=1.302;ClippingRankSum=0.000;DP=135839;ExcessHet=3.0130;FS=35.950;InbreedingCoeff=0.0110;MLEAC=1,2;MLEAF=0.000201,0.000402;MQ=23.12;MQRankSum=0.062;QD=7.39;ReadPosRankSum=0.818;SOR=5.005
chr21	8215089	9101	28S	G	T	451.41	SNV	AC=4;AF=0.000824;AN=4852;BaseQRankSum=-2.007;ClippingRankSum=0.000;DP=131873;ExcessHet=3.1470;FS=43.492;InbreedingCoeff=-0.0248;MLEAC=2;MLEAF=0.000412;MQ=17.61;MQRankSum=0.859;QD=2.49;ReadPosRankSum=0.676;SOR=0.029
chr21	8215093	9105	28S	G	A	305.28	SNV	AC=8;AF=0.00229;AN=3486;BaseQRankSum=0.000;ClippingRankSum=0.000;DP=122147;ExcessHet=3.1075;FS=14.697;InbreedingCoeff=-0.0454;MLEAC=6;MLEAF=0.00172;MQ=3.85;MQRankSum=0.399;QD=1.85;ReadPosRankSum=-0.224;SOR=3.147
chr21	8215094	9106	28S	G	A	584.37	SNV	AC=12;AF=0.00343;AN=3498;BaseQRankSum=0.000;ClippingRankSum=0.000;DP=121946;ExcessHet=3.1411;FS=6.447;InbreedingCoeff=-0.0457;MLEAC=7;MLEAF=0.002;MQ=6.07;MQRankSum=-0.255;QD=1.74;ReadPosRankSum=-0.173;SOR=4.714
chr21	8215097	9109	28S	CG	C	1.30235e+06	SNV	AC=3301;AF=0.667;AN=4948;BaseQRankSum=0.000;ClippingRankSum=0.000;DP=126484;ExcessHet=0.0000;FS=139.953;InbreedingCoeff=0.1211;MLEAC=3310;MLEAF=0.669;MQ=31.57;MQRankSum=-3.566;QD=14.46;ReadPosRankSum=-0.194;SOR=19.321
chr21	8215100	9112	28S	G	T	90.84	SNV	AC=3;AF=0.000602;AN=4986;BaseQRankSum=-1.440;ClippingRankSum=0.000;DP=82443;ExcessHet=3.0155;FS=8.712;InbreedingCoeff=-0.0057;MLEAC=1;MLEAF=0.000201;MQ=28.70;MQRankSum=0.248;QD=0.80;ReadPosRankSum=0.000;SOR=1.735
chr21	8215107	9119	28S	T	G	132.22	SNV	AC=10;AF=0.002;AN=4988;BaseQRankSum=-2.690;ClippingRankSum=0.000;DP=77410;ExcessHet=0.8035;FS=0.000;InbreedingCoeff=0.0015;MLEAC=3;MLEAF=0.000601;MQ=27.39;MQRankSum=0.042;QD=1.70;ReadPosRankSum=0.256;SOR=0.277
chr21	8215125	9137	28S	C	G	8858.04	SNV	AC=5;AF=0.001;AN=4986;BaseQRankSum=1.223;ClippingRankSum=0.000;DP=65886;ExcessHet=3.0417;FS=6.687;InbreedingCoeff=-0.0098;MLEAC=5;MLEAF=0.001;MQ=33.23;MQRankSum=1.646;QD=16.37;ReadPosRankSum=-0.287;SOR=0.314
chr21	8259336	9139	28S	T	G	59.3	SNV	AC=5;AF=0.00329;AN=1522;BaseQRankSum=-1.242;ClippingRankSum=0.000;DP=6182;ExcessHet=3.6395;FS=0.000;InbreedingCoeff=-0.0689;MLEAC=5;MLEAF=0.00329;MQ=34.14;MQRankSum=0.180;QD=1.29;ReadPosRankSum=-0.000;SOR=0.039
chr21	8215129	9141	28S	T	G	74.53	SNV	AC=20;AF=0.00402;AN=4972;BaseQRankSum=-1.990;ClippingRankSum=-0.000;DP=63925;ExcessHet=10.5961;FS=0.000;InbreedingCoeff=-0.0317;MLEAC=7;MLEAF=0.00141;MQ=28.10;MQRankSum=0.110;QD=0.34;ReadPosRankSum=0.481;SOR=3.151
chr21	8215149	9161	28S	C	T,*	390.43	SNV	AC=2,1;AF=0.000403,0.000201;AN=4968;BaseQRankSum=1.030;ClippingRankSum=0.000;DP=55901;ExcessHet=3.0131;FS=0.000;InbreedingCoeff=0.0187;MLEAC=2,1;MLEAF=0.000403,0.000201;MQ=20.50;MQRankSum=-1.213;QD=6.40;ReadPosRankSum=0.744;SOR=0.360
chr21	8215153	9165	28S	G	GC,*	328.9	SNV	AC=3,1;AF=0.000604,0.000201;AN=4968;BaseQRankSum=0.000;ClippingRankSum=0.000;DP=55430;ExcessHet=3.0157;FS=0.000;InbreedingCoeff=0.0093;MLEAC=3,1;MLEAF=0.000604,0.000201;MQ=28.58;MQRankSum=0.489;QD=3.65;ReadPosRankSum=1.065;SOR=0.034
chr21	8215227	9239	28S	A	G	16165.6	SNV	AC=89;AF=0.0183;AN=4854;BaseQRankSum=0.812;ClippingRankSum=-0.000;DP=37445;ExcessHet=6.3627;FS=0.000;InbreedingCoeff=-0.0580;MLEAC=95;MLEAF=0.0196;MQ=34.63;MQRankSum=0.287;QD=9.45;ReadPosRankSum=-0.191;SOR=0.336
chr21	8259456	9259	28S	A	G	1852.77	SNV	AC=34;AF=0.045;AN=756;BaseQRankSum=-0.000;ClippingRankSum=-0.000;DP=1504;ExcessHet=0.0000;FS=0.000;InbreedingCoeff=0.0511;MLEAC=36;MLEAF=0.0476;MQ=35.82;MQRankSum=0.241;QD=19.30;ReadPosRankSum=0.598;SOR=2.352
chr21	8215250	9262	28S	A	G	237.68	SNV	AC=3;AF=0.000629;AN=4766;BaseQRankSum=-0.000;ClippingRankSum=-0.000;DP=30766;ExcessHet=3.3855;FS=0.000;InbreedingCoeff=-0.0355;MLEAC=3;MLEAF=0.000629;MQ=33.86;MQRankSum=0.142;QD=6.42;ReadPosRankSum=0.170;SOR=0.070
chr21	8215289	9301	28S	C	T	426.45	SNV	AC=6;AF=0.00143;AN=4210;BaseQRankSum=-0.000;ClippingRankSum=0.000;DP=23675;ExcessHet=0.0078;FS=0.000;InbreedingCoeff=-0.0490;MLEAC=5;MLEAF=0.00119;MQ=32.66;MQRankSum=-0.212;QD=5.20;ReadPosRankSum=0.180;SOR=0.223
chr21	8215295	9307	28S	C	T	43.92	SNV	AC=3;AF=0.000723;AN=4152;BaseQRankSum=0.349;ClippingRankSum=-0.000;DP=23252;ExcessHet=3.0166;FS=0.000;InbreedingCoeff=-0.0561;MLEAC=3;MLEAF=0.000723;MQ=30.64;MQRankSum=-0.269;QD=2.00;ReadPosRankSum=0.366;SOR=0.223
chr21	8215541	9553	28S	T	G	62.39	SNV	AC=5;AF=0.00323;AN=1550;BaseQRankSum=-1.068;ClippingRankSum=-0.000;DP=2996;ExcessHet=0.0692;FS=0.000;InbreedingCoeff=-0.0943;MLEAC=4;MLEAF=0.00258;MQ=23.51;MQRankSum=-0.366;QD=2.84;ReadPosRankSum=0.842;SOR=0.412
chr21	8215730	9742	28S	C	T	80.37	SNV	AC=4;AF=0.0274;AN=146;DP=159;ExcessHet=0.0003;FS=0.000;InbreedingCoeff=-0.0842;MLEAC=4;MLEAF=0.0274;MQ=7.51;QD=40.19;SOR=2.833
chr21	8215739	9751	28S	C	T	155.08	SNV	AC=8;AF=0.0541;AN=148;DP=165;ExcessHet=0.0000;FS=0.000;InbreedingCoeff=-0.0016;MLEAC=8;MLEAF=0.0541;MQ=10.27;QD=38.77;SOR=3.912
chr21	8215752	9764	28S	C	T	256.94	SNV	AC=12;AF=0.0882;AN=136;DP=190;ExcessHet=0.0000;FS=0.000;InbreedingCoeff=0.0666;MLEAC=12;MLEAF=0.0882;MQ=10.12;QD=64.24;SOR=4.407
chr21	8215762	9774	28S	G	A	257.96	SNV	AC=12;AF=0.0909;AN=132;DP=228;ExcessHet=0.0000;FS=0.000;InbreedingCoeff=0.0706;MLEAC=12;MLEAF=0.0909;MQ=8.83;QD=64.49;SOR=4.407
chr21	8215763	9775	28S	C	T	258.39	SNV	AC=12;AF=0.0923;AN=130;DP=230;ExcessHet=0.0000;FS=0.000;InbreedingCoeff=0.0747;MLEAC=12;MLEAF=0.0923;MQ=8.75;QD=64.60;SOR=4.407
chr21	8215766	9778	28S	C	T	260.61	SNV	AC=12;AF=0.1;AN=120;DP=247;ExcessHet=0.0000;FS=0.000;InbreedingCoeff=0.0890;MLEAC=12;MLEAF=0.1;MQ=8.23;QD=65.15;SOR=4.407
chr21	8215776	9788	28S	C	A	295.12	SNV	AC=14;AF=0.111;AN=126;DP=284;ExcessHet=0.0000;FS=0.000;InbreedingCoeff=0.1094;MLEAC=14;MLEAF=0.111;MQ=8.04;QD=73.78;SOR=4.615
chr21	8215780	9792	28S	C	T	250.04	SNV	AC=14;AF=0.1;AN=140;DP=307;ExcessHet=0.0000;FS=0.000;InbreedingCoeff=0.0786;MLEAC=14;MLEAF=0.1;MQ=7.38;QD=125.02;SOR=4.407
chr21	8215793	9805	28S	C	T	94.64	SNV	AC=8;AF=0.0563;AN=142;DP=356;ExcessHet=0.0000;FS=0.000;InbreedingCoeff=-0.0038;MLEAC=7;MLEAF=0.0493;MQ=5.40;QD=47.32;SOR=3.611
chr21	8215804	9816	28S	G	A	288.01	SNV	AC=11;AF=0.0671;AN=164;BaseQRankSum=-0.000;ClippingRankSum=-0.000;DP=436;ExcessHet=0.0000;FS=0.000;InbreedingCoeff=0.0254;MLEAC=11;MLEAF=0.0671;MQ=5.89;MQRankSum=0.674;QD=144.01;ReadPosRankSum=-0.000;SOR=2.833
chr21	8215807	9819	28S	G	A	350.58	SNV	AC=11;AF=0.0632;AN=174;BaseQRankSum=-0.000;ClippingRankSum=-0.000;DP=472;ExcessHet=0.0000;FS=0.000;InbreedingCoeff=0.0383;MLEAC=11;MLEAF=0.0632;MQ=6.40;MQRankSum=0.967;QD=50.08;ReadPosRankSum=-0.431;SOR=3.258
chr21	8215808	9820	28S	C	A	350.02	SNV	AC=11;AF=0.0618;AN=178;BaseQRankSum=-0.000;ClippingRankSum=-0.000;DP=475;ExcessHet=0.0000;FS=0.000;InbreedingCoeff=0.0320;MLEAC=11;MLEAF=0.0618;MQ=7.05;MQRankSum=0.967;QD=31.82;ReadPosRankSum=-0.431;SOR=3.611
chr21	8215820	9832	28S	C	G	643.37	SNV	AC=27;AF=0.127;AN=212;BaseQRankSum=-0.000;ClippingRankSum=-0.000;DP=577;ExcessHet=0.0000;FS=0.000;InbreedingCoeff=0.1643;MLEAC=26;MLEAF=0.123;MQ=8.29;MQRankSum=0.967;QD=58.49;ReadPosRankSum=-0.431;SOR=4.615
chr21	8215827	9839	28S	G	T	774.31	SNV	AC=37;AF=0.162;AN=228;BaseQRankSum=-0.000;ClippingRankSum=-0.000;DP=641;ExcessHet=-0.0000;FS=0.000;InbreedingCoeff=0.2131;MLEAC=35;MLEAF=0.154;MQ=8.80;MQRankSum=0.967;QD=70.39;ReadPosRankSum=-0.000;SOR=5.058
chr21	8215869	9881	28S	C	T	11866.5	SNV	AC=281;AF=0.505;AN=556;BaseQRankSum=-0.000;ClippingRankSum=-0.000;DP=1005;ExcessHet=0.0000;FS=0.000;InbreedingCoeff=0.4351;MLEAC=301;MLEAF=0.541;MQ=24.82;MQRankSum=1.150;QD=42.69;ReadPosRankSum=0.319;SOR=5.157
chr21	8215876	9888	28S	C	T	11941	SNV	AC=280;AF=0.479;AN=584;BaseQRankSum=-0.000;ClippingRankSum=-0.000;DP=1057;ExcessHet=0.0000;FS=0.000;InbreedingCoeff=0.4189;MLEAC=302;MLEAF=0.517;MQ=24.79;MQRankSum=1.150;QD=41.46;ReadPosRankSum=0.674;SOR=4.950
chr21	8215905	9917	28S	C	T	11179.2	SNV	AC=338;AF=0.48;AN=704;BaseQRankSum=-0.000;ClippingRankSum=-0.000;DP=1199;ExcessHet=-0.0000;FS=0.000;InbreedingCoeff=0.4146;MLEAC=364;MLEAF=0.517;MQ=26.54;MQRankSum=1.150;QD=30.30;ReadPosRankSum=-0.000;SOR=3.928
chr21	8215933	9945	28S	C	T	10187.8	SNV	AC=257;AF=0.413;AN=622;BaseQRankSum=-0.000;ClippingRankSum=-0.000;DP=1176;ExcessHet=-0.0000;FS=0.000;InbreedingCoeff=0.4051;MLEAC=278;MLEAF=0.447;MQ=22.77;MQRankSum=0.967;QD=42.27;ReadPosRankSum=-0.319;SOR=4.858
chr21	8215941	9953	28S	C	T	9121.68	SNV	AC=221;AF=0.311;AN=710;BaseQRankSum=-0.000;ClippingRankSum=-0.000;DP=1164;ExcessHet=-0.0000;FS=0.000;InbreedingCoeff=0.3765;MLEAC=243;MLEAF=0.342;MQ=22.87;MQRankSum=0.967;QD=40.01;ReadPosRankSum=-0.090;SOR=5.011
chr21	8215945	9957	28S	G	C,T	10082.8	SNV	AC=225,8;AF=0.415,0.0148;AN=542;BaseQRankSum=-0.000;ClippingRankSum=-0.000;DP=1127;ExcessHet=0.0000;FS=0.000;InbreedingCoeff=0.5445;MLEAC=188,5;MLEAF=0.347,0.00923;MQ=21.88;MQRankSum=0.967;QD=41.32;ReadPosRankSum=-0.272;SOR=5.136
chr21	8215963	9975	28S	C	T	5951.03	SNV	AC=150;AF=0.305;AN=492;BaseQRankSum=-0.000;ClippingRankSum=-0.000;DP=965;ExcessHet=0.0000;FS=0.000;InbreedingCoeff=0.3666;MLEAC=163;MLEAF=0.331;MQ=19.80;MQRankSum=0.967;QD=39.94;ReadPosRankSum=-0.431;SOR=4.791
chr21	8215966	9978	28S	C	T	5678.11	SNV	AC=139;AF=0.29;AN=480;BaseQRankSum=-0.000;ClippingRankSum=-0.000;DP=950;ExcessHet=0.0000;FS=0.000;InbreedingCoeff=0.3641;MLEAC=153;MLEAF=0.319;MQ=19.52;MQRankSum=0.967;QD=38.89;ReadPosRankSum=-0.431;SOR=4.990
chr21	8215973	9985	28S	C	T	3674.39	SNV	AC=95;AF=0.22;AN=432;BaseQRankSum=-0.000;ClippingRankSum=-0.000;DP=886;ExcessHet=0.0000;FS=0.000;InbreedingCoeff=0.3021;MLEAC=103;MLEAF=0.238;MQ=16.70;MQRankSum=0.967;QD=40.38;ReadPosRankSum=-0.431;SOR=5.570
chr21	8215993	10005	28S	G	A	360.61	SNV	AC=19;AF=0.0651;AN=292;BaseQRankSum=-0.000;ClippingRankSum=-0.000;DP=317;ExcessHet=0.0000;FS=0.000;InbreedingCoeff=0.0352;MLEAC=18;MLEAF=0.0616;MQ=15.77;MQRankSum=0.674;QD=90.15;ReadPosRankSum=-0.674;SOR=3.767
chr21	8215999	10011	28S	GGCGC	G	719.36	INDEL	AC=14;AF=0.0493;AN=284;BaseQRankSum=-0.000;ClippingRankSum=-0.000;DP=260;ExcessHet=0.0000;FS=0.000;InbreedingCoeff=0.0365;MLEAC=9;MLEAF=0.0317;MQ=19.52;MQRankSum=0.674;QD=71.94;ReadPosRankSum=-0.674;SOR=4.047
chr21	8216052	10064	28S	GGT	G	79.09	INDEL	AC=4;AF=0.167;AN=24;DP=34;ExcessHet=0.0135;FS=0.000;InbreedingCoeff=0.2469;MLEAC=4;MLEAF=0.167;MQ=8.13;QD=39.54;SOR=2.833
chr21	8216175	10187	28S	G	A	1435.45	SNV	AC=68;AF=0.145;AN=470;BaseQRankSum=-0.000;ClippingRankSum=-0.000;DP=435;ExcessHet=-0.0000;FS=0.000;InbreedingCoeff=0.1998;MLEAC=62;MLEAF=0.132;MQ=24.78;MQRankSum=0.674;QD=95.70;ReadPosRankSum=-0.000;SOR=0.779
chr21	8216179	10191	28S	C	T	1475.3	SNV	AC=68;AF=0.142;AN=478;BaseQRankSum=-0.000;ClippingRankSum=-0.000;DP=524;ExcessHet=-0.0000;FS=0.000;InbreedingCoeff=0.1976;MLEAC=62;MLEAF=0.13;MQ=18.41;MQRankSum=0.674;QD=98.35;ReadPosRankSum=-0.000;SOR=0.779
chr21	8216186	10198	28S	C	T	1473.56	SNV	AC=68;AF=0.141;AN=482;BaseQRankSum=-0.000;ClippingRankSum=-0.000;DP=534;ExcessHet=-0.0000;FS=0.000;InbreedingCoeff=0.1971;MLEAC=62;MLEAF=0.129;MQ=18.50;MQRankSum=0.674;QD=86.68;ReadPosRankSum=-0.000;SOR=0.807
chr21	8216194	10206	28S	G	A	1773.76	SNV	AC=68;AF=0.143;AN=476;BaseQRankSum=-0.000;ClippingRankSum=-0.000;DP=545;ExcessHet=-0.0000;FS=0.000;InbreedingCoeff=0.2144;MLEAC=64;MLEAF=0.134;MQ=17.84;MQRankSum=0.674;QD=104.34;ReadPosRankSum=-0.000;SOR=0.807
chr21	8216195	10207	28S	C	T	1780.78	SNV	AC=68;AF=0.144;AN=472;BaseQRankSum=-0.000;ClippingRankSum=-0.000;DP=575;ExcessHet=0.0000;FS=0.000;InbreedingCoeff=0.2022;MLEAC=66;MLEAF=0.14;MQ=17.62;MQRankSum=0.674;QD=77.43;ReadPosRankSum=-0.000;SOR=0.475
chr21	8216204	10216	28S	G	T	2259.89	SNV	AC=69;AF=0.133;AN=520;BaseQRankSum=-0.000;ClippingRankSum=-0.000;DP=852;ExcessHet=-0.0000;FS=0.000;InbreedingCoeff=0.2055;MLEAC=67;MLEAF=0.129;MQ=13.59;MQRankSum=0.674;QD=66.47;ReadPosRankSum=-0.000;SOR=0.446
chr21	8216212	10224	28S	G	A	3388.6	SNV	AC=68;AF=0.125;AN=544;BaseQRankSum=-0.524;ClippingRankSum=-0.000;DP=1489;ExcessHet=-0.0000;FS=24.892;InbreedingCoeff=0.2195;MLEAC=71;MLEAF=0.131;MQ=13.54;MQRankSum=1.150;QD=35.67;ReadPosRankSum=-0.319;SOR=0.101
chr21	8216214	10226	28S	C	T	3368.69	SNV	AC=67;AF=0.116;AN=578;BaseQRankSum=-0.524;ClippingRankSum=-0.000;DP=1584;ExcessHet=0.0000;FS=31.148;InbreedingCoeff=0.1987;MLEAC=70;MLEAF=0.121;MQ=13.34;MQRankSum=1.150;QD=34.73;ReadPosRankSum=-0.319;SOR=0.096
chr21	8216226	10238	28S	T	A	3554.48	SNV	AC=67;AF=0.104;AN=644;BaseQRankSum=-0.674;ClippingRankSum=-0.000;DP=2025;ExcessHet=-0.0000;FS=29.896;InbreedingCoeff=0.1694;MLEAC=71;MLEAF=0.11;MQ=12.69;MQRankSum=1.150;QD=35.19;ReadPosRankSum=0.524;SOR=0.317
chr21	8216246	10258	28S	A	T	3588.37	SNV	AC=71;AF=0.0896;AN=792;BaseQRankSum=-0.000;ClippingRankSum=-0.000;DP=2842;ExcessHet=0.0000;FS=104.566;InbreedingCoeff=0.1256;MLEAC=79;MLEAF=0.0997;MQ=12.44;MQRankSum=1.150;QD=30.15;ReadPosRankSum=0.586;SOR=2.070
chr21	8216253	10265	28S	C	T	3560.01	SNV	AC=71;AF=0.0828;AN=858;BaseQRankSum=-0.000;ClippingRankSum=-0.000;DP=2986;ExcessHet=0.0000;FS=119.197;InbreedingCoeff=0.1104;MLEAC=78;MLEAF=0.0909;MQ=12.54;MQRankSum=1.150;QD=28.48;ReadPosRankSum=0.322;SOR=2.122
chr21	8216270	10282	28S	G	T	3428.74	SNV	AC=88;AF=0.0892;AN=986;BaseQRankSum=-0.000;ClippingRankSum=-0.000;DP=3315;ExcessHet=-0.0000;FS=134.581;InbreedingCoeff=0.1075;MLEAC=94;MLEAF=0.0953;MQ=13.36;MQRankSum=1.150;QD=23.65;ReadPosRankSum=0.875;SOR=2.944
chr21	8216297	10309	28S	G	A	320.41	SNV	AC=8;AF=0.00312;AN=2568;DP=3921;ExcessHet=0.0000;FS=0.000;InbreedingCoeff=-0.1107;MLEAC=6;MLEAF=0.00234;MQ=11.60;QD=29.13;SOR=2.494
chr21	8216310	10322	28S	G	T	21575	SNV	AC=549;AF=0.31;AN=1772;BaseQRankSum=-0.000;ClippingRankSum=-0.000;DP=3991;ExcessHet=-0.0000;FS=155.116;InbreedingCoeff=0.2447;MLEAC=582;MLEAF=0.328;MQ=30.69;MQRankSum=0.967;QD=39.59;ReadPosRankSum=-0.000;SOR=3.277
chr21	8216314	10326	28S	A	G	21337.2	SNV	AC=541;AF=0.302;AN=1790;BaseQRankSum=-0.000;ClippingRankSum=-0.000;DP=4037;ExcessHet=0.0000;FS=151.674;InbreedingCoeff=0.2424;MLEAC=574;MLEAF=0.321;MQ=30.78;MQRankSum=0.967;QD=39.01;ReadPosRankSum=-0.000;SOR=3.256
chr21	8216317	10329	28S	C	T	21481.3	SNV	AC=543;AF=0.306;AN=1774;BaseQRankSum=-0.000;ClippingRankSum=-0.000;DP=4072;ExcessHet=0.0000;FS=151.711;InbreedingCoeff=0.2359;MLEAC=576;MLEAF=0.325;MQ=30.74;MQRankSum=0.967;QD=38.92;ReadPosRankSum=-0.000;SOR=3.273
chr21	8216334	10346	28S	C	T	19044.4	SNV	AC=468;AF=0.253;AN=1852;BaseQRankSum=-0.000;ClippingRankSum=-0.000;DP=4311;ExcessHet=-0.0000;FS=149.655;InbreedingCoeff=0.2058;MLEAC=505;MLEAF=0.273;MQ=30.39;MQRankSum=0.967;QD=35.66;ReadPosRankSum=-0.674;SOR=3.046
chr21	8216338	10350	28S	C	T	18962.2	SNV	AC=467;AF=0.246;AN=1898;BaseQRankSum=-0.000;ClippingRankSum=-0.000;DP=4384;ExcessHet=0.0000;FS=145.708;InbreedingCoeff=0.2011;MLEAC=506;MLEAF=0.267;MQ=30.52;MQRankSum=0.967;QD=35.25;ReadPosRankSum=-0.916;SOR=3.020
chr21	8216346	10358	28S	T	C	16211.8	SNV	AC=378;AF=0.211;AN=1792;BaseQRankSum=-0.000;ClippingRankSum=-0.000;DP=4327;ExcessHet=-0.0000;FS=246.104;InbreedingCoeff=0.1931;MLEAC=415;MLEAF=0.232;MQ=29.55;MQRankSum=0.967;QD=38.15;ReadPosRankSum=-0.674;SOR=2.948
chr21	8216355	10367	28S	G	A	301.52	SNV	AC=8;AF=0.00349;AN=2294;DP=4034;ExcessHet=0.0000;FS=0.000;InbreedingCoeff=-0.1220;MLEAC=6;MLEAF=0.00262;MQ=10.76;QD=30.15;SOR=3.258
chr21	8216358	10370	28S	C	T	8093.83	SNV	AC=196;AF=0.118;AN=1656;BaseQRankSum=-0.000;ClippingRankSum=-0.000;DP=3818;ExcessHet=-0.0000;FS=153.748;InbreedingCoeff=0.1153;MLEAC=218;MLEAF=0.132;MQ=28.31;MQRankSum=0.674;QD=37.65;ReadPosRankSum=-0.674;SOR=3.031
chr21	8216361	10373	28S	T	G	5054.81	SNV	AC=124;AF=0.0761;AN=1630;BaseQRankSum=-0.000;ClippingRankSum=-0.000;DP=3551;ExcessHet=-0.0000;FS=95.293;InbreedingCoeff=0.0625;MLEAC=135;MLEAF=0.0828;MQ=27.50;MQRankSum=0.967;QD=31.99;ReadPosRankSum=-0.674;SOR=2.249
chr21	8216369	10381	28S	G	A	3749.75	SNV	AC=97;AF=0.0631;AN=1538;BaseQRankSum=-0.000;ClippingRankSum=-0.000;DP=3263;ExcessHet=0.0000;FS=79.864;InbreedingCoeff=0.0574;MLEAC=100;MLEAF=0.065;MQ=27.64;MQRankSum=0.967;QD=32.33;ReadPosRankSum=-0.967;SOR=3.738
chr21	8216373	10385	28S	C	A	682.59	SNV	AC=21;AF=0.0125;AN=1676;BaseQRankSum=-0.000;ClippingRankSum=-0.000;DP=3036;ExcessHet=-0.0000;FS=8.451;InbreedingCoeff=-0.0833;MLEAC=18;MLEAF=0.0107;MQ=24.94;MQRankSum=0.967;QD=32.50;ReadPosRankSum=-0.967;SOR=3.229
chr21	8216378	10390	28S	G	A	1365.3	SNV	AC=37;AF=0.0242;AN=1526;BaseQRankSum=-0.000;ClippingRankSum=-0.000;DP=2870;ExcessHet=0.0000;FS=28.802;InbreedingCoeff=-0.0482;MLEAC=36;MLEAF=0.0236;MQ=26.17;MQRankSum=0.967;QD=35.93;ReadPosRankSum=-0.967;SOR=3.952
chr21	8216383	10395	28S	A	G	245.8	SNV	AC=6;AF=0.00392;AN=1532;DP=2635;ExcessHet=0.0000;FS=0.000;InbreedingCoeff=-0.1149;MLEAC=5;MLEAF=0.00326;MQ=13.66;QD=30.72;SOR=0.693
chr21	8216385	10397	28S	C	T	246.21	SNV	AC=6;AF=0.00407;AN=1476;DP=2592;ExcessHet=0.0000;FS=0.000;InbreedingCoeff=-0.1187;MLEAC=4;MLEAF=0.00271;MQ=13.18;QD=30.78;SOR=0.693
chr21	8216526	10538	28S	G	A	44.35	SNV	AC=6;AF=0.00787;AN=762;DP=1079;ExcessHet=0.0000;FS=0.000;InbreedingCoeff=-0.1054;MLEAC=4;MLEAF=0.00525;MQ=5.79;QD=14.78;SOR=2.833
chr21	8216548	10560	28S	C	T	43.07	SNV	AC=6;AF=0.00709;AN=846;DP=1228;ExcessHet=0.0000;FS=0.000;InbreedingCoeff=-0.1100;MLEAC=4;MLEAF=0.00473;MQ=5.79;QD=14.36;SOR=2.833
chr21	8216730	10742	28S	G	A	98.22	SNV	AC=6;AF=0.00507;AN=1184;BaseQRankSum=-0.000;ClippingRankSum=-0.000;DP=1210;ExcessHet=0.0002;FS=0.000;InbreedingCoeff=-0.1409;MLEAC=6;MLEAF=0.00507;MQ=6.86;MQRankSum=0.674;QD=49.11;ReadPosRankSum=0.674;SOR=3.611
chr21	8216737	10749	28S	C	T	97.08	SNV	AC=6;AF=0.00469;AN=1278;BaseQRankSum=-0.000;ClippingRankSum=-0.000;DP=1231;ExcessHet=0.0001;FS=0.000;InbreedingCoeff=-0.1444;MLEAC=6;MLEAF=0.00469;MQ=6.79;MQRankSum=0.674;QD=48.54;ReadPosRankSum=0.674;SOR=3.611
chr21	8216751	10763	28S	C	T	98.89	SNV	AC=7;AF=0.00503;AN=1392;BaseQRankSum=-0.000;ClippingRankSum=-0.000;DP=1236;ExcessHet=0.0000;FS=0.000;InbreedingCoeff=-0.1445;MLEAC=6;MLEAF=0.00431;MQ=7.46;MQRankSum=0.674;QD=49.45;ReadPosRankSum=-0.674;SOR=3.590
chr21	8216760	10772	28S	G	T	55.77	SNV	AC=3;AF=0.00206;AN=1456;BaseQRankSum=-0.000;ClippingRankSum=-0.000;DP=1250;ExcessHet=0.0090;FS=0.000;InbreedingCoeff=-0.1553;MLEAC=3;MLEAF=0.00206;MQ=7.67;MQRankSum=0.674;QD=27.89;ReadPosRankSum=-0.674;SOR=2.788
chr21	8216839	10851	28S	C	G	31900.8	SNV	AC=187;AF=0.0377;AN=4966;BaseQRankSum=0.000;ClippingRankSum=0.000;DP=34592;ExcessHet=0.0000;FS=0.000;InbreedingCoeff=0.0611;MLEAC=181;MLEAF=0.0364;MQ=22.61;MQRankSum=0.049;QD=9.98;ReadPosRankSum=0.520;SOR=3.734
chr21	8216841	10853	28S	G	GC	1853.87	SNV	AC=27;AF=0.00544;AN=4960;BaseQRankSum=-0.000;ClippingRankSum=0.000;DP=37457;ExcessHet=2.9318;FS=0.000;InbreedingCoeff=-0.0203;MLEAC=20;MLEAF=0.00403;MQ=21.69;MQRankSum=-0.210;QD=5.19;ReadPosRankSum=0.257;SOR=1.351
chr21	8216843	10855	28S	C	T,*	432.69	SNV	AC=3,2;AF=0.000602,0.000401;AN=4984;BaseQRankSum=0.000;ClippingRankSum=-0.000;DP=42303;ExcessHet=3.0193;FS=27.416;InbreedingCoeff=0.0120;MLEAC=3,2;MLEAF=0.000602,0.000401;MQ=18.76;MQRankSum=-0.000;QD=4.75;ReadPosRankSum=0.921;SOR=0.004
chr21	8216845	10857	28S	C	G,*	199.63	SNV	AC=7,2;AF=0.0014,0.000401;AN=4992;BaseQRankSum=-0.000;ClippingRankSum=-0.000;DP=44874;ExcessHet=3.0421;FS=0.000;InbreedingCoeff=0.0066;MLEAC=5,2;MLEAF=0.001,0.000401;MQ=20.61;MQRankSum=-0.300;QD=1.27;ReadPosRankSum=-0.000;SOR=0.046
chr21	8216847	10859	28S	C	A,*	242.66	SNV	AC=3,2;AF=0.0006,0.0004;AN=4998;BaseQRankSum=-0.000;ClippingRankSum=0.000;DP=47128;ExcessHet=3.0191;FS=0.000;InbreedingCoeff=0.0050;MLEAC=2,2;MLEAF=0.0004,0.0004;MQ=16.83;MQRankSum=1.068;QD=3.91;ReadPosRankSum=0.566;SOR=0.139
chr21	8216848	10860	28S	C	CA,*	262.25	SNV	AC=2,2;AF=0.0004,0.0004;AN=4998;BaseQRankSum=0.693;ClippingRankSum=0.000;DP=48165;ExcessHet=3.0156;FS=0.000;InbreedingCoeff=0.0057;MLEAC=2,2;MLEAF=0.0004,0.0004;MQ=16.24;MQRankSum=1.160;QD=3.75;ReadPosRankSum=0.684;SOR=0.057
chr21	8216849	10861	28S	C	A,*	262.14	SNV	AC=2,2;AF=0.0004,0.0004;AN=5004;BaseQRankSum=0.000;ClippingRankSum=0.000;DP=49192;ExcessHet=3.0156;FS=0.000;InbreedingCoeff=0.0057;MLEAC=2,2;MLEAF=0.0004,0.0004;MQ=16.44;MQRankSum=0.796;QD=3.64;ReadPosRankSum=0.248;SOR=0.073
chr21	8216861	10873	28S	A	G,AC	276.5	SNV	AC=1,2;AF=0.0002,0.0004;AN=5004;BaseQRankSum=-1.717;ClippingRankSum=0.000;DP=62278;ExcessHet=3.0130;FS=0.000;InbreedingCoeff=0.0095;MLEAC=1,2;MLEAF=0.0002,0.0004;MQ=22.34;MQRankSum=0.165;QD=5.53;ReadPosRankSum=1.004;SOR=0.010
chr21	8216884	10896	28S	C	T	241.36	SNV	AC=7;AF=0.0014;AN=5008;BaseQRankSum=0.000;ClippingRankSum=0.000;DP=94158;ExcessHet=3.0580;FS=0.000;InbreedingCoeff=-0.0024;MLEAC=5;MLEAF=0.000998;MQ=19.58;MQRankSum=-0.224;QD=1.69;ReadPosRankSum=0.971;SOR=0.036
chr21	8216895	10907	28S	G	A	1283.32	SNV	AC=7;AF=0.0014;AN=5008;BaseQRankSum=0.622;ClippingRankSum=0.000;DP=102771;ExcessHet=3.2495;FS=0.000;InbreedingCoeff=-0.0050;MLEAC=6;MLEAF=0.0012;MQ=24.36;MQRankSum=0.000;QD=3.95;ReadPosRankSum=0.686;SOR=0.020
chr21	8216919	10931	28S	C	T	316.57	SNV	AC=8;AF=0.0016;AN=5008;BaseQRankSum=-0.000;ClippingRankSum=0.000;DP=145961;ExcessHet=3.0346;FS=0.000;InbreedingCoeff=-0.0017;MLEAC=6;MLEAF=0.0012;MQ=30.49;MQRankSum=1.065;QD=1.64;ReadPosRankSum=-0.578;SOR=0.013
chr21	8216926	10938	28S	CCTCT	CCT,CCTCTCT,C,CCTCTCTCT	163463	INDEL	AC=297,348,26,17;AF=0.0593,0.0695,0.00519,0.00339;AN=5008;BaseQRankSum=0.364;ClippingRankSum=0.000;DP=149958;ExcessHet=258.7798;FS=0.000;InbreedingCoeff=-0.1285;MLEAC=285,333,21,14;MLEAF=0.0569,0.0665,0.00419,0.0028;MQ=32.16;MQRankSum=-0.432;QD=4.47;ReadPosRankSum=0.541;SOR=0.387
chr21	8216942	10954	28S	T	C,TCC	11704.6	SNV	AC=26,2;AF=0.00519,0.000399;AN=5008;BaseQRankSum=0.559;ClippingRankSum=0.000;DP=232209;ExcessHet=3.3622;FS=0.000;InbreedingCoeff=0.0057;MLEAC=22,1;MLEAF=0.00439,0.0002;MQ=31.95;MQRankSum=-0.034;QD=6.39;ReadPosRankSum=0.364;SOR=0.937
chr21	8216944	10956	28S	C	G	709.76	SNV	AC=5;AF=0.000998;AN=5008;BaseQRankSum=-0.000;ClippingRankSum=0.000;DP=237185;ExcessHet=3.0285;FS=0.000;InbreedingCoeff=-0.0013;MLEAC=3;MLEAF=0.000599;MQ=26.72;MQRankSum=0.787;QD=6.34;ReadPosRankSum=-0.706;SOR=0.035
chr21	8444189	10967	28S	C	T	62.77	SNV	AC=5;AF=0.00123;AN=4056;BaseQRankSum=-0.431;ClippingRankSum=-0.000;DP=13501;ExcessHet=0.0002;FS=0.000;InbreedingCoeff=-0.0498;MLEAC=3;MLEAF=0.00074;MQ=11.00;MQRankSum=0.967;QD=8.97;ReadPosRankSum=-0.967;SOR=2.584
chr21	8444195	10973	28S	CCT	CCTCT,C,CCTCTCT	25975.2	INDEL	AC=198,11,8;AF=0.0472,0.00262,0.00191;AN=4192;BaseQRankSum=-0.000;ClippingRankSum=-0.000;DP=17417;ExcessHet=0.0001;FS=0.000;InbreedingCoeff=0.1710;MLEAC=188,10,8;MLEAF=0.0448,0.00239,0.00191;MQ=32.55;MQRankSum=-0.000;QD=16.00;ReadPosRankSum=0.388;SOR=0.507
chr21	8216969	10981	28S	C	A	2112.71	SNV	AC=6;AF=0.0012;AN=5008;BaseQRankSum=-1.919;ClippingRankSum=0.000;DP=312850;ExcessHet=3.0233;FS=0.000;InbreedingCoeff=-0.0012;MLEAC=4;MLEAF=0.000799;MQ=33.89;MQRankSum=0.675;QD=2.80;ReadPosRankSum=0.780;SOR=0.042
chr21	8444210	10988	28S	C	G,CTG	29458.2	SNV	AC=117,3;AF=0.0256,0.000656;AN=4572;BaseQRankSum=-0.000;ClippingRankSum=-0.000;DP=27359;ExcessHet=0.0000;FS=0.000;InbreedingCoeff=0.2064;MLEAC=112,2;MLEAF=0.0245,0.000437;MQ=35.63;MQRankSum=0.000;QD=16.90;ReadPosRankSum=1.388;SOR=1.345
chr21	8444211	10989	28S	T	C	401.56	SNV	AC=8;AF=0.00175;AN=4566;BaseQRankSum=-0.000;ClippingRankSum=-0.000;DP=27797;ExcessHet=6.0272;FS=0.000;InbreedingCoeff=-0.0494;MLEAC=5;MLEAF=0.0011;MQ=27.97;MQRankSum=-0.349;QD=4.62;ReadPosRankSum=0.431;SOR=0.115
chr21	8216985	10997	28S	T	G	8012.93	SNV	AC=185;AF=0.037;AN=5002;BaseQRankSum=-2.408;ClippingRankSum=0.000;DP=407766;ExcessHet=941.7801;FS=0.000;InbreedingCoeff=-0.2252;MLEAC=209;MLEAF=0.0418;MQ=32.93;MQRankSum=-1.085;QD=0.76;ReadPosRankSum=0.455;SOR=0.818
chr21	8216987	10999	28S	G	T	2224.73	SNV	AC=5;AF=0.000998;AN=5008;BaseQRankSum=-0.630;ClippingRankSum=0.000;DP=410864;ExcessHet=3.0233;FS=0.000;InbreedingCoeff=-0.0013;MLEAC=4;MLEAF=0.000799;MQ=31.93;MQRankSum=1.920;QD=2.81;ReadPosRankSum=-0.705;SOR=0.051
chr21	8216997	11009	28S	C	CG,CGG	452030	SNV	AC=614,3;AF=0.123,0.000599;AN=5008;BaseQRankSum=0.431;ClippingRankSum=0.000;DP=374795;ExcessHet=152.8856;FS=0.000;InbreedingCoeff=-0.1279;MLEAC=611,2;MLEAF=0.122,0.000399;MQ=33.77;MQRankSum=-0.310;QD=5.93;ReadPosRankSum=0.580;SOR=1.706
chr21	8216999	11011	28S	G	T	13715.7	SNV	AC=59;AF=0.0118;AN=5008;BaseQRankSum=-1.098;ClippingRankSum=0.000;DP=409774;ExcessHet=4.6154;FS=0.000;InbreedingCoeff=-0.0118;MLEAC=49;MLEAF=0.00978;MQ=32.71;MQRankSum=-0.167;QD=3.18;ReadPosRankSum=-0.082;SOR=0.035
chr21	8217002	11014	28S	G	GC,GGA	24561.7	INDEL	AC=15,87;AF=0.003,0.0174;AN=5006;BaseQRankSum=0.335;ClippingRankSum=0.000;DP=406076;ExcessHet=7.6245;FS=0.000;InbreedingCoeff=-0.0177;MLEAC=13,77;MLEAF=0.0026,0.0154;MQ=32.73;MQRankSum=-2.314;QD=3.47;ReadPosRankSum=-0.839;SOR=0.025
chr21	8217003	11015	28S	G	GA	5729.82	SNV	AC=7;AF=0.0014;AN=5006;BaseQRankSum=1.015;ClippingRankSum=0.000;DP=413387;ExcessHet=9.1793;FS=0.000;InbreedingCoeff=-0.0132;MLEAC=7;MLEAF=0.0014;MQ=30.35;MQRankSum=2.445;QD=4.83;ReadPosRankSum=-0.288;SOR=0.092
chr21	8217004	11016	28S	A	C	2571.29	SNV	AC=17;AF=0.0034;AN=5002;BaseQRankSum=-1.538;ClippingRankSum=0.000;DP=417418;ExcessHet=445.5451;FS=0.000;InbreedingCoeff=-0.1317;MLEAC=6;MLEAF=0.0012;MQ=33.02;MQRankSum=-0.152;QD=4.01;ReadPosRankSum=0.364;SOR=0.022
chr21	8217007	11019	28S	A	C,G,AG	3058.75	SNV	AC=11,2,1;AF=0.0022,0.000399,0.0002;AN=5008;BaseQRankSum=-2.152;ClippingRankSum=0.000;DP=391022;ExcessHet=3.1181;FS=0.000;InbreedingCoeff=0.0975;MLEAC=6,1,1;MLEAF=0.0012,0.0002,0.0002;MQ=33.16;MQRankSum=-0.091;QD=3.75;ReadPosRankSum=0.227;SOR=0.035
chr21	8217011	11023	28S	T	C	1919.55	SNV	AC=5;AF=0.000998;AN=5008;BaseQRankSum=-2.261;ClippingRankSum=0.000;DP=381336;ExcessHet=144.1573;FS=0.000;InbreedingCoeff=-0.0683;MLEAC=3;MLEAF=0.000599;MQ=32.82;MQRankSum=-0.403;QD=4.43;ReadPosRankSum=-0.180;SOR=0.099
chr21	8217014	11026	28S	GGGCGGCAGGGGCC	G,TGGCGGCAGGGGCC	832.57	SNV	AC=1,2;AF=0.0002,0.000399;AN=5008;BaseQRankSum=-1.099;ClippingRankSum=0.000;DP=351550;ExcessHet=3.0129;FS=0.000;InbreedingCoeff=-0.0002;MLEAC=1,2;MLEAF=0.0002,0.000399;MQ=28.56;MQRankSum=-2.146;QD=1.64;ReadPosRankSum=-0.345;SOR=0.018
chr21	8217017	11029	28S	C	T,*	530.72	SNV	AC=3,1;AF=0.000599,0.0002;AN=5008;BaseQRankSum=-0.693;ClippingRankSum=0.000;DP=351289;ExcessHet=3.0155;FS=0.000;InbreedingCoeff=0.0002;MLEAC=3,1;MLEAF=0.000599,0.0002;MQ=23.66;MQRankSum=-0.687;QD=1.42;ReadPosRankSum=-0.599;SOR=0.013
chr21	8444254	11032	28S	T	G	487.2	SNV	AC=51;AF=0.0107;AN=4754;BaseQRankSum=-1.719;ClippingRankSum=0.000;DP=61960;ExcessHet=76.1349;FS=0.000;InbreedingCoeff=-0.0895;MLEAC=28;MLEAF=0.00589;MQ=36.58;MQRankSum=-0.311;QD=0.78;ReadPosRankSum=0.788;SOR=0.009
chr21	8217021	11033	28S	A	C,*	401.81	SNV	AC=2,1;AF=0.0004,0.0002;AN=5006;BaseQRankSum=-1.429;ClippingRankSum=0.000;DP=346246;ExcessHet=3.0132;FS=0.000;InbreedingCoeff=0.0170;MLEAC=2,1;MLEAF=0.0004,0.0002;MQ=32.19;MQRankSum=0.354;QD=0.85;ReadPosRankSum=0.310;SOR=0.003
chr21	8217022	11034	28S	G	C,*	2174.66	SNV	AC=3,1;AF=0.000599,0.0002;AN=5006;BaseQRankSum=-1.143;ClippingRankSum=0.000;DP=339677;ExcessHet=3.0155;FS=0.000;InbreedingCoeff=-0.0001;MLEAC=3,1;MLEAF=0.000599,0.0002;MQ=21.93;MQRankSum=0.163;QD=5.19;ReadPosRankSum=-1.162;SOR=0.046
chr21	8217025	11037	28S	GCCGGCGGCGGCCGCCGCGGGGCC	G,ACCGGCGGCGGCCGCCGCGGGGCC,*	892.77	INDEL	AC=3,1,1;AF=0.000599,0.0002,0.0002;AN=5008;BaseQRankSum=0.292;ClippingRankSum=0.000;DP=338843;ExcessHet=3.0190;FS=0.000;InbreedingCoeff=-0.0008;MLEAC=3,1,1;MLEAF=0.000599,0.0002,0.0002;MQ=25.29;MQRankSum=-2.533;QD=2.58;ReadPosRankSum=-1.156;SOR=0.014
chr21	8217028	11040	28S	GGCGGCGGCCGCC	G,*	570.89	INDEL	AC=1,3;AF=0.0002,0.000599;AN=5008;BaseQRankSum=-0.753;ClippingRankSum=0.000;DP=338004;ExcessHet=3.0155;FS=0.000;InbreedingCoeff=-0.0002;MLEAC=1,3;MLEAF=0.0002,0.000599;MQ=17.53;MQRankSum=-3.608;QD=2.56;ReadPosRankSum=-1.904;SOR=0.014
chr21	8217029	11041	28S	G	T,*	1043.88	SNV	AC=1,4;AF=0.0002,0.000799;AN=5008;BaseQRankSum=-2.377;ClippingRankSum=0.000;DP=338016;ExcessHet=3.0190;FS=0.000;InbreedingCoeff=-0.0005;MLEAC=1,4;MLEAF=0.0002,0.000799;MQ=13.81;MQRankSum=-3.681;QD=3.04;ReadPosRankSum=1.813;SOR=0.017
chr21	8217030	11042	28S	C	T,*	1505.65	SNV	AC=2,4;AF=0.000399,0.000799;AN=5008;BaseQRankSum=0.000;ClippingRankSum=0.000;DP=337740;ExcessHet=3.0233;FS=0.000;InbreedingCoeff=-0.0007;MLEAC=2,4;MLEAF=0.000399,0.000799;MQ=21.04;MQRankSum=-0.331;QD=3.21;ReadPosRankSum=1.685;SOR=0.019
chr21	8444266	11044	28S	CG	CGG,C	5300.97	SNV	AC=4,1;AF=0.000819,0.000205;AN=4882;BaseQRankSum=0.000;ClippingRankSum=0.000;DP=70551;ExcessHet=3.0198;FS=0.000;InbreedingCoeff=0.0163;MLEAC=3,1;MLEAF=0.000615,0.000205;MQ=34.84;MQRankSum=0.621;QD=17.38;ReadPosRankSum=0.910;SOR=0.262
chr21	8217033	11045	28S	C	T,*	678.39	SNV	AC=2,4;AF=0.000399,0.000799;AN=5008;BaseQRankSum=0.000;ClippingRankSum=0.000;DP=337369;ExcessHet=3.0234;FS=0.000;InbreedingCoeff=-0.0006;MLEAC=1,4;MLEAF=0.0002,0.000799;MQ=21.00;MQRankSum=1.769;QD=2.40;ReadPosRankSum=0.185;SOR=0.010
chr21	8217035	11047	28S	GCCGCCGCGGGGCC	G,*	1189.2	INDEL	AC=2,4;AF=0.000399,0.000799;AN=5008;BaseQRankSum=0.424;ClippingRankSum=0.000;DP=336950;ExcessHet=3.0234;FS=0.000;InbreedingCoeff=-0.0005;MLEAC=1,4;MLEAF=0.0002,0.000799;MQ=19.40;MQRankSum=-2.202;QD=4.10;ReadPosRankSum=-2.083;SOR=0.049
chr21	8217036	11048	28S	C	G,T,*	2092.63	SNV	AC=3,1,6;AF=0.000599,0.0002,0.0012;AN=5008;BaseQRankSum=-2.576;ClippingRankSum=0.000;DP=333322;ExcessHet=3.0511;FS=0.000;InbreedingCoeff=0.0154;MLEAC=1,1,5;MLEAF=0.0002,0.0002,0.000998;MQ=32.34;MQRankSum=0.049;QD=3.45;ReadPosRankSum=-0.141;SOR=0.016
chr21	8217037	11049	28S	C	T,*	1458.49	SNV	AC=1,6;AF=0.0002,0.0012;AN=5008;BaseQRankSum=0.606;ClippingRankSum=0.000;DP=330579;ExcessHet=3.0287;FS=0.000;InbreedingCoeff=0.0004;MLEAC=1,5;MLEAF=0.0002,0.000998;MQ=20.70;MQRankSum=-0.157;QD=4.00;ReadPosRankSum=0.795;SOR=0.045
chr21	8444271	11049	28S	G	GGA,A	140947	INDEL	AC=455,1;AF=0.0931,0.000205;AN=4888;BaseQRankSum=0.000;ClippingRankSum=-0.000;DP=68675;ExcessHet=6.5153;FS=0.000;InbreedingCoeff=-0.0101;MLEAC=450,1;MLEAF=0.0921,0.000205;MQ=38.05;MQRankSum=0.200;QD=11.49;ReadPosRankSum=-0.116;SOR=0.273
chr21	8444272	11050	28S	G	GAGA	324.42	INDEL	AC=3;AF=0.000637;AN=4708;BaseQRankSum=-0.000;ClippingRankSum=-0.000;DP=80275;ExcessHet=64.0921;FS=0.000;InbreedingCoeff=-0.0607;MLEAC=3;MLEAF=0.000637;MQ=3.30;MQRankSum=-0.210;QD=10.47;ReadPosRankSum=0.755;SOR=0.283
chr21	8444273	11051	28S	A	C	726.75	SNV	AC=26;AF=0.0054;AN=4818;BaseQRankSum=-1.456;ClippingRankSum=0.000;DP=81231;ExcessHet=36.3193;FS=0.000;InbreedingCoeff=-0.0592;MLEAC=11;MLEAF=0.00228;MQ=34.85;MQRankSum=-0.502;QD=1.88;ReadPosRankSum=0.680;SOR=0.007
chr21	8217040	11052	28S	C	T,*	1523.58	SNV	AC=4,6;AF=0.000799,0.0012;AN=5008;BaseQRankSum=-0.731;ClippingRankSum=0.000;DP=329623;ExcessHet=3.0496;FS=0.000;InbreedingCoeff=-0.0009;MLEAC=4,5;MLEAF=0.000799,0.000998;MQ=21.22;MQRankSum=0.105;QD=2.76;ReadPosRankSum=-0.116;SOR=0.046
chr21	8217041	11053	28S	GCGGGGCCCCGGCGGCGGGGGCA	G,*	5261.03	INDEL	AC=7,6;AF=0.0014,0.0012;AN=5004;BaseQRankSum=-0.800;ClippingRankSum=0.000;DP=321870;ExcessHet=3.0832;FS=0.000;InbreedingCoeff=0.0096;MLEAC=7,5;MLEAF=0.0014,0.000999;MQ=28.26;MQRankSum=-0.563;QD=5.35;ReadPosRankSum=0.364;SOR=0.072
chr21	8217046	11058	28S	G	T,*	5985.9	SNV	AC=2,13;AF=0.0004,0.0026;AN=5006;BaseQRankSum=-0.872;ClippingRankSum=0.000;DP=328005;ExcessHet=3.1018;FS=0.000;InbreedingCoeff=-0.0025;MLEAC=2,12;MLEAF=0.0004,0.0024;MQ=18.65;MQRankSum=2.931;QD=3.81;ReadPosRankSum=0.093;SOR=0.129
chr21	8217047	11059	28S	C	A,*	5775	SNV	AC=1,13;AF=0.0002,0.0026;AN=5006;BaseQRankSum=-3.203;ClippingRankSum=0.000;DP=329223;ExcessHet=3.0929;FS=0.000;InbreedingCoeff=0.0074;MLEAC=1,12;MLEAF=0.0002,0.0024;MQ=22.57;MQRankSum=0.384;QD=5.58;ReadPosRankSum=-0.787;SOR=0.068
chr21	8217053	11065	28S	C	T,*	34459.8	SNV	AC=21,8;AF=0.0042,0.0016;AN=5004;BaseQRankSum=-2.881;ClippingRankSum=0.000;DP=323099;ExcessHet=3.3686;FS=0.000;InbreedingCoeff=-0.0037;MLEAC=21,8;MLEAF=0.0042,0.0016;MQ=31.79;MQRankSum=-0.063;QD=7.80;ReadPosRankSum=0.243;SOR=0.288
chr21	8217056	11068	28S	CGGGGGCACGGTCCCCCGCGAGGGGGGCCCGGGCACCCG	TGGGGGCACGGTCCCCCGCGAGGGGGGCCCGGGCACCCG,C,*	8025.12	SNV	AC=8,1,7;AF=0.0016,0.0002,0.0014;AN=5006;BaseQRankSum=-0.534;ClippingRankSum=0.000;DP=321466;ExcessHet=3.1159;FS=0.000;InbreedingCoeff=0.0017;MLEAC=7,1,7;MLEAF=0.0014,0.0002,0.0014;MQ=28.74;MQRankSum=0.715;QD=4.65;ReadPosRankSum=0.357;SOR=0.049
chr21	8217057	11069	28S	G	A,*	5147.59	SNV	AC=2,8;AF=0.0004,0.0016;AN=5006;BaseQRankSum=-0.181;ClippingRankSum=0.000;DP=319927;ExcessHet=3.0497;FS=0.000;InbreedingCoeff=-0.0005;MLEAC=2,8;MLEAF=0.0004,0.0016;MQ=11.47;MQRankSum=0.544;QD=5.61;ReadPosRankSum=-0.446;SOR=0.052
chr21	8217062	11074	28S	CACGGTCCCCCGCGAGGGGGGCCCGGGCACCCGGGGGG	C,*	5149.45	INDEL	AC=1,8;AF=0.0002,0.0016;AN=4998;BaseQRankSum=-3.073;ClippingRankSum=0.000;DP=323311;ExcessHet=3.0420;FS=0.000;InbreedingCoeff=0.0011;MLEAC=1,8;MLEAF=0.0002,0.0016;MQ=17.93;MQRankSum=-0.347;QD=5.86;ReadPosRankSum=-0.990;SOR=0.157
chr21	8217063	11075	28S	A	C,*	42660.8	SNV	AC=469,5;AF=0.094,0.001;AN=4988;BaseQRankSum=-1.393;ClippingRankSum=0.000;DP=301812;ExcessHet=206.4213;FS=0.000;InbreedingCoeff=-0.0669;MLEAC=488,5;MLEAF=0.0978,0.001;MQ=34.20;MQRankSum=-0.197;QD=1.06;ReadPosRankSum=-1.436;SOR=0.091
chr21	8217067	11079	28S	T	G,*	3985.16	SNV	AC=48,1;AF=0.00959,0.0002;AN=5006;BaseQRankSum=-1.971;ClippingRankSum=0.000;DP=340860;ExcessHet=5.5271;FS=0.000;InbreedingCoeff=0.0715;MLEAC=44,1;MLEAF=0.00879,0.0002;MQ=33.97;MQRankSum=-0.327;QD=1.80;ReadPosRankSum=-1.417;SOR=0.037
chr21	8217076	11088	28S	A	C,*	20108.1	SNV	AC=210,1;AF=0.042,0.0002;AN=5004;BaseQRankSum=-1.012;ClippingRankSum=0.000;DP=299241;ExcessHet=60.3822;FS=0.000;InbreedingCoeff=0.0289;MLEAC=204,1;MLEAF=0.0408,0.0002;MQ=34.28;MQRankSum=0.020;QD=1.28;ReadPosRankSum=-1.574;SOR=0.256
chr21	8444312	11090	28S	C	T,*	315.63	SNV	AC=5,1;AF=0.00102,0.000205;AN=4886;BaseQRankSum=-0.000;ClippingRankSum=0.000;DP=92432;ExcessHet=0.0069;FS=0.000;InbreedingCoeff=0.0472;MLEAC=2,1;MLEAF=0.000409,0.000205;MQ=26.41;MQRankSum=0.448;QD=3.71;ReadPosRankSum=0.343;SOR=0.006
chr21	8217082	11094	28S	GCCCGGGCA	G,*	3188.08	INDEL	AC=4,2;AF=0.000799,0.000399;AN=5008;BaseQRankSum=0.550;ClippingRankSum=0.000;DP=268634;ExcessHet=3.0233;FS=0.000;InbreedingCoeff=-0.0008;MLEAC=3,1;MLEAF=0.000599,0.0002;MQ=31.39;MQRankSum=1.187;QD=5.55;ReadPosRankSum=-0.186;SOR=0.082
chr21	8444319	11097	28S	C	A,*	376.45	SNV	AC=2,1;AF=0.000408,0.000204;AN=4902;BaseQRankSum=-0.000;ClippingRankSum=0.000;DP=92460;ExcessHet=0.0014;FS=0.000;InbreedingCoeff=0.0521;MLEAC=1,1;MLEAF=0.000204,0.000204;MQ=33.49;MQRankSum=-0.365;QD=9.65;ReadPosRankSum=0.000;SOR=0.085
chr21	8217090	11102	28S	A	C,*	95693.8	SNV	AC=1072,6;AF=0.219,0.00122;AN=4904;BaseQRankSum=-1.248;ClippingRankSum=0.000;DP=217083;ExcessHet=997.3138;FS=0.000;InbreedingCoeff=-0.2842;MLEAC=1135,5;MLEAF=0.231,0.00102;MQ=34.08;MQRankSum=-0.194;QD=1.07;ReadPosRankSum=-1.791;SOR=1.164
chr21	8444326	11104	28S	CGGGGGCACGGTCCCCCGCGAGGGGGGCCCGGGCACCCG	C,TGGGGGCACGGTCCCCCGCGAGGGGGGCCCGGGCACCCG,CGGGGCACGGTCCCCCGCGAGGGGGGCCCGGGCACCCG	1211.13	INDEL	AC=4,5,1;AF=0.000818,0.00102,0.000204;AN=4892;BaseQRankSum=-0.843;ClippingRankSum=0.000;DP=91929;ExcessHet=0.0210;FS=0.000;InbreedingCoeff=0.0650;MLEAC=2,4,1;MLEAF=0.000409,0.000818,0.000204;MQ=35.47;MQRankSum=0.543;QD=3.35;ReadPosRankSum=0.000;SOR=0.021
chr21	8217093	11105	28S	C	CG,*	2793.09	SNV	AC=1,2;AF=0.0002,0.000399;AN=5008;BaseQRankSum=0.343;ClippingRankSum=0.000;DP=234834;ExcessHet=3.0129;FS=0.000;InbreedingCoeff=-0.0001;MLEAC=1,1;MLEAF=0.0002,0.0002;MQ=23.97;MQRankSum=0.257;QD=14.04;ReadPosRankSum=-1.472;SOR=0.483
chr21	8217096	11108	28S	G	C	4073.59	SNV	AC=6;AF=0.0012;AN=5008;BaseQRankSum=1.026;ClippingRankSum=0.000;DP=200653;ExcessHet=3.0285;FS=0.000;InbreedingCoeff=-0.0017;MLEAC=5;MLEAF=0.000998;MQ=34.60;MQRankSum=1.049;QD=6.72;ReadPosRankSum=0.094;SOR=0.160
chr21	8217099	11111	28S	G	GC,*	999.54	SNV	AC=2,1;AF=0.000399,0.0002;AN=5008;BaseQRankSum=0.422;ClippingRankSum=0.000;DP=200055;ExcessHet=3.0129;FS=0.000;InbreedingCoeff=-0.0001;MLEAC=2,1;MLEAF=0.000399,0.0002;MQ=32.48;MQRankSum=0.671;QD=4.83;ReadPosRankSum=1.339;SOR=0.115
chr21	8444333	11111	28S	A	C,G,*	23915.5	SNV	AC=348,4,4;AF=0.0732,0.000841,0.000841;AN=4756;BaseQRankSum=-1.205;ClippingRankSum=0.000;DP=91747;ExcessHet=169.1907;FS=0.000;InbreedingCoeff=0.1084;MLEAC=370,4,2;MLEAF=0.0778,0.000841,0.000421;MQ=36.74;MQRankSum=0.756;QD=1.35;ReadPosRankSum=-0.079;SOR=0.054
chr21	8217100	11112	28S	CCGG	C,CCGGCGG	1997.28	INDEL	AC=6,2;AF=0.0012,0.000399;AN=5008;BaseQRankSum=-1.422;ClippingRankSum=0.000;DP=199250;ExcessHet=3.0362;FS=0.000;InbreedingCoeff=0.0100;MLEAC=4,2;MLEAF=0.000799,0.000399;MQ=34.10;MQRankSum=-0.069;QD=7.93;ReadPosRankSum=-0.578;SOR=0.013
chr21	8444337	11115	28S	T	G,*	1300.55	SNV	AC=32,4;AF=0.00645,0.000806;AN=4964;BaseQRankSum=-2.345;ClippingRankSum=0.000;DP=127821;ExcessHet=4.1616;FS=0.000;InbreedingCoeff=0.0711;MLEAC=21,2;MLEAF=0.00423,0.000403;MQ=35.01;MQRankSum=1.242;QD=0.77;ReadPosRankSum=0.473;SOR=0.017
chr21	8444338	11116	28S	C	G,*	2498.89	SNV	AC=4,4;AF=0.000802,0.000802;AN=4986;BaseQRankSum=0.000;ClippingRankSum=0.000;DP=136002;ExcessHet=3.0351;FS=0.000;InbreedingCoeff=0.0072;MLEAC=4,2;MLEAF=0.000802,0.000401;MQ=22.72;MQRankSum=2.028;QD=7.62;ReadPosRankSum=1.589;SOR=0.099
chr21	8444342	11120	28S	C	A,*	554.95	SNV	AC=2,4;AF=0.000401,0.000802;AN=4988;BaseQRankSum=-3.099;ClippingRankSum=-0.000;DP=138299;ExcessHet=3.0235;FS=0.000;InbreedingCoeff=0.0036;MLEAC=2,2;MLEAF=0.000401,0.000401;MQ=18.17;MQRankSum=0.157;QD=2.32;ReadPosRankSum=-0.129;SOR=0.027
chr21	8444345	11123	28S	G	GA,*	757.57	SNV	AC=1,4;AF=0.000201,0.000805;AN=4972;BaseQRankSum=-0.306;ClippingRankSum=0.000;DP=116917;ExcessHet=3.0197;FS=0.000;InbreedingCoeff=0.0162;MLEAC=1,2;MLEAF=0.000201,0.000402;MQ=24.56;MQRankSum=0.733;QD=2.09;ReadPosRankSum=0.876;SOR=0.021
chr21	8444346	11124	28S	A	C,*	14341.7	SNV	AC=120,4;AF=0.0241,0.000805;AN=4972;BaseQRankSum=-1.671;ClippingRankSum=0.000;DP=140479;ExcessHet=20.3047;FS=0.000;InbreedingCoeff=0.0536;MLEAC=115,2;MLEAF=0.0231,0.000402;MQ=33.72;MQRankSum=1.854;QD=1.64;ReadPosRankSum=0.891;SOR=0.019
chr21	8217115	11127	28S	A	C	5347.53	SNV	AC=83;AF=0.0167;AN=4968;BaseQRankSum=-1.376;ClippingRankSum=0.000;DP=181378;ExcessHet=1115.8847;FS=0.000;InbreedingCoeff=-0.2562;MLEAC=69;MLEAF=0.0139;MQ=34.06;MQRankSum=0.124;QD=1.88;ReadPosRankSum=-0.757;SOR=0.179
chr21	8217117	11129	28S	T	G	263.82	SNV	AC=6;AF=0.0012;AN=4998;BaseQRankSum=-2.808;ClippingRankSum=0.000;DP=150855;ExcessHet=668.7662;FS=0.000;InbreedingCoeff=-0.1791;MLEAC=4;MLEAF=0.0008;MQ=34.09;MQRankSum=0.031;QD=1.37;ReadPosRankSum=-0.792;SOR=0.803
chr21	8444352	11130	28S	GCCCGGGCA	G,*	645.2	INDEL	AC=2,4;AF=0.000401,0.000801;AN=4992;BaseQRankSum=0.000;ClippingRankSum=0.000;DP=136070;ExcessHet=3.0234;FS=0.000;InbreedingCoeff=0.0013;MLEAC=2,2;MLEAF=0.000401,0.000401;MQ=20.87;MQRankSum=1.379;QD=2.75;ReadPosRankSum=0.694;SOR=0.012
chr21	8444355	11133	28S	C	T,*	802.05	SNV	AC=1,6;AF=0.0002,0.0012;AN=4994;BaseQRankSum=0.327;ClippingRankSum=0.000;DP=136858;ExcessHet=3.0287;FS=0.000;InbreedingCoeff=0.0007;MLEAC=1,4;MLEAF=0.0002,0.000801;MQ=15.54;MQRankSum=-0.061;QD=2.54;ReadPosRankSum=1.523;SOR=0.018
chr21	8444360	11138	28S	A	C,G,*	16295.9	SNV	AC=204,1,4;AF=0.041,0.000201,0.000805;AN=4972;BaseQRankSum=-2.572;ClippingRankSum=0.000;DP=140814;ExcessHet=40.9123;FS=0.000;InbreedingCoeff=0.1201;MLEAC=212,1,3;MLEAF=0.0426,0.000201,0.000603;MQ=32.09;MQRankSum=2.540;QD=1.06;ReadPosRankSum=0.293;SOR=0.035
chr21	8444363	11141	28S	C	CG,*	4029	SNV	AC=16,4;AF=0.0032,0.000801;AN=4996;BaseQRankSum=0.000;ClippingRankSum=0.000;DP=151945;ExcessHet=3.1770;FS=0.000;InbreedingCoeff=-0.0022;MLEAC=15,2;MLEAF=0.003,0.0004;MQ=26.88;MQRankSum=-0.043;QD=4.65;ReadPosRankSum=-0.406;SOR=0.066
chr21	8444370	11148	28S	CCGG	C,CCGGCGG	1184.36	INDEL	AC=3,3;AF=0.0006,0.0006;AN=4998;BaseQRankSum=0.411;ClippingRankSum=0.000;DP=144071;ExcessHet=3.0235;FS=0.000;InbreedingCoeff=0.0026;MLEAC=3,3;MLEAF=0.0006,0.0006;MQ=28.76;MQRankSum=0.318;QD=5.13;ReadPosRankSum=-0.085;SOR=0.024
chr21	8217143	11155	28S	T	G	1481.92	SNV	AC=28;AF=0.00562;AN=4982;BaseQRankSum=-1.842;ClippingRankSum=0.000;DP=145039;ExcessHet=1057.0036;FS=8.352;InbreedingCoeff=-0.2437;MLEAC=21;MLEAF=0.00422;MQ=32.69;MQRankSum=0.240;QD=2.28;ReadPosRankSum=0.106;SOR=1.952
chr21	8444385	11163	28S	A	C	276.67	SNV	AC=10;AF=0.002;AN=4994;BaseQRankSum=-2.326;ClippingRankSum=0.000;DP=166807;ExcessHet=304.5164;FS=0.000;InbreedingCoeff=-0.1111;MLEAC=6;MLEAF=0.0012;MQ=29.13;MQRankSum=1.686;QD=0.76;ReadPosRankSum=-0.385;SOR=0.006
chr21	8217154	11166	28S	A	C	953.2	SNV	AC=12;AF=0.00241;AN=4976;BaseQRankSum=-2.633;ClippingRankSum=0.000;DP=138085;ExcessHet=972.4583;FS=0.000;InbreedingCoeff=-0.2321;MLEAC=4;MLEAF=0.000804;MQ=31.69;MQRankSum=0.124;QD=2.63;ReadPosRankSum=-0.325;SOR=0.758
chr21	8444395	11173	28S	C	G	3915.23	SNV	AC=17;AF=0.0034;AN=5002;BaseQRankSum=0.000;ClippingRankSum=0.000;DP=151760;ExcessHet=0.0832;FS=0.000;InbreedingCoeff=0.0668;MLEAC=16;MLEAF=0.0032;MQ=26.76;MQRankSum=1.138;QD=4.35;ReadPosRankSum=0.153;SOR=0.074
chr21	8217166	11178	28S	C	T,*	6668.07	SNV	AC=25,1;AF=0.00505,0.000202;AN=4954;BaseQRankSum=-0.751;ClippingRankSum=0.000;DP=139000;ExcessHet=3.3446;FS=22.164;InbreedingCoeff=0.0267;MLEAC=25,1;MLEAF=0.00505,0.000202;MQ=28.66;MQRankSum=0.200;QD=4.76;ReadPosRankSum=0.418;SOR=3.010
chr21	8217168	11180	28S	T	G,*	3668.91	SNV	AC=33,1;AF=0.00671,0.000203;AN=4918;BaseQRankSum=-1.613;ClippingRankSum=0.000;DP=144155;ExcessHet=4.4891;FS=12.562;InbreedingCoeff=0.0824;MLEAC=18,1;MLEAF=0.00366,0.000203;MQ=30.43;MQRankSum=0.245;QD=3.86;ReadPosRankSum=-0.716;SOR=0.113
chr21	8217176	11188	28S	G	T,GC	1629.19	SNV	AC=1,2;AF=0.000204,0.000408;AN=4904;BaseQRankSum=-0.879;ClippingRankSum=0.000;DP=141084;ExcessHet=3.0139;FS=3.414;InbreedingCoeff=0.0536;MLEAC=1,2;MLEAF=0.000204,0.000408;MQ=15.53;MQRankSum=-0.950;QD=8.07;ReadPosRankSum=0.622;SOR=1.054
chr21	8217181	11193	28S	CGGGG	C,*	178.75	INDEL	AC=2,1;AF=0.000407,0.000204;AN=4910;BaseQRankSum=1.148;ClippingRankSum=0.000;DP=133938;ExcessHet=3.0136;FS=1.335;InbreedingCoeff=0.0441;MLEAC=2,1;MLEAF=0.000407,0.000204;MQ=11.27;MQRankSum=0.679;QD=1.26;ReadPosRankSum=-1.651;SOR=0.398
chr21	8217188	11200	28S	C	A,*	19856.3	SNV	AC=58,1;AF=0.0118,0.000203;AN=4928;BaseQRankSum=-0.590;ClippingRankSum=0.000;DP=155185;ExcessHet=0.0011;FS=0.000;InbreedingCoeff=0.0522;MLEAC=56,1;MLEAF=0.0114,0.000203;MQ=28.77;MQRankSum=0.761;QD=6.70;ReadPosRankSum=0.467;SOR=1.945
chr21	8217208	11220	28S	C	A,G	467.36	SNV	AC=1,2;AF=0.0294,0.0588;AN=34;BaseQRankSum=0.458;ClippingRankSum=0.000;DP=213806;ExcessHet=3.4523;FS=67.884;InbreedingCoeff=-0.0891;MLEAC=1,2;MLEAF=0.0294,0.0588;MQ=1.69;MQRankSum=0.239;QD=3.74;ReadPosRankSum=0.581;SOR=0.000
chr21	8217212	11224	28S	C	A	21694	SNV	AC=231;AF=0.0462;AN=5004;BaseQRankSum=-1.569;ClippingRankSum=0.000;DP=231826;ExcessHet=92.0109;FS=0.000;InbreedingCoeff=-0.0766;MLEAC=215;MLEAF=0.043;MQ=29.92;MQRankSum=-1.698;QD=1.99;ReadPosRankSum=-3.427;SOR=1.635
chr21	8444447	11225	28S	C	T	517.99	SNV	AC=3;AF=0.000602;AN=4984;BaseQRankSum=0.000;ClippingRankSum=0.000;DP=149257;ExcessHet=3.0190;FS=0.000;InbreedingCoeff=-0.0027;MLEAC=2;MLEAF=0.000401;MQ=20.03;MQRankSum=-0.542;QD=12.05;ReadPosRankSum=0.880;SOR=0.057
chr21	8217215	11227	28S	C	G	1360.6	SNV	AC=5;AF=0.000998;AN=5008;BaseQRankSum=-0.020;ClippingRankSum=0.000;DP=242347;ExcessHet=3.0233;FS=0.000;InbreedingCoeff=-0.0012;MLEAC=4;MLEAF=0.000799;MQ=30.01;MQRankSum=2.179;QD=3.02;ReadPosRankSum=0.501;SOR=0.038
chr21	8217218	11230	28S	A	C,G	1528.63	SNV	AC=15,2;AF=0.003,0.0004;AN=5006;BaseQRankSum=-1.210;ClippingRankSum=0.000;DP=255896;ExcessHet=3.1589;FS=0.000;InbreedingCoeff=0.0309;MLEAC=4,2;MLEAF=0.000799,0.0004;MQ=29.86;MQRankSum=-0.098;QD=2.70;ReadPosRankSum=-0.774;SOR=0.016
chr21	8217223	11235	28S	A	C,G	21161.2	SNV	AC=166,48;AF=0.0332,0.0096;AN=4998;BaseQRankSum=-1.997;ClippingRankSum=0.000;DP=296269;ExcessHet=27.3458;FS=0.000;InbreedingCoeff=0.0075;MLEAC=128,45;MLEAF=0.0256,0.009;MQ=30.39;MQRankSum=-0.769;QD=1.57;ReadPosRankSum=-0.465;SOR=1.484
chr21	8217226	11238	28S	T	G	65.86	SNV	AC=3;AF=0.000599;AN=5008;BaseQRankSum=-1.521;ClippingRankSum=0.000;DP=272250;ExcessHet=71.7253;FS=0.000;InbreedingCoeff=-0.0462;MLEAC=2;MLEAF=0.000399;MQ=30.15;MQRankSum=-0.245;QD=0.71;ReadPosRankSum=0.224;SOR=0.230
chr21	8217230	11242	28S	G	A	2769.52	SNV	AC=7;AF=0.0014;AN=5008;BaseQRankSum=-0.853;ClippingRankSum=0.000;DP=273973;ExcessHet=3.0580;FS=0.000;InbreedingCoeff=0.0063;MLEAC=6;MLEAF=0.0012;MQ=31.07;MQRankSum=-0.240;QD=2.47;ReadPosRankSum=0.809;SOR=0.621
chr21	8217231	11243	28S	TCG	T	2041.58	INDEL	AC=8;AF=0.0016;AN=5008;BaseQRankSum=-1.468;ClippingRankSum=0.000;DP=278536;ExcessHet=54.1172;FS=0.000;InbreedingCoeff=-0.0407;MLEAC=7;MLEAF=0.0014;MQ=30.57;MQRankSum=0.148;QD=2.94;ReadPosRankSum=-0.473;SOR=0.066
chr21	8217236	11248	28S	C	T	11610.9	SNV	AC=8;AF=0.0016;AN=5008;BaseQRankSum=0.055;ClippingRankSum=0.000;DP=276598;ExcessHet=3.0494;FS=0.000;InbreedingCoeff=-0.0019;MLEAC=8;MLEAF=0.0016;MQ=31.22;MQRankSum=1.387;QD=5.28;ReadPosRankSum=1.364;SOR=0.594
chr21	8444476	11254	28S	GCCC	GCCCCCC,GCCCCCCCCC,G,GCCCCCCCCCCC,GCCCCCCC,GCCCCCCCCCCCC	9767.84	INDEL	AC=33,32,14,6,5,2;AF=0.00731,0.00709,0.0031,0.00133,0.00111,0.000443;AN=4514;BaseQRankSum=0.000;ClippingRankSum=0.000;DP=164212;ExcessHet=0.0000;FS=0.000;InbreedingCoeff=0.3294;MLEAC=26,17,7,3,5,1;MLEAF=0.00576,0.00377,0.00155,0.000665,0.00111,0.000222;MQ=14.49;MQRankSum=-0.344;QD=9.50;ReadPosRankSum=-0.927;SOR=0.063
chr21	8444477	11255	28S	C	CG,*	785.16	SNV	AC=1,15;AF=0.000238,0.00358;AN=4194;BaseQRankSum=-1.333;ClippingRankSum=0.000;DP=170231;ExcessHet=3.1822;FS=0.000;InbreedingCoeff=0.0535;MLEAC=1,8;MLEAF=0.000238,0.00191;MQ=2.56;MQRankSum=-0.297;QD=2.76;ReadPosRankSum=0.033;SOR=0.027
chr21	8217244	11256	28S	C	T	8898.47	SNV	AC=8;AF=0.0016;AN=5008;BaseQRankSum=-0.999;ClippingRankSum=0.000;DP=285230;ExcessHet=3.0346;FS=0.000;InbreedingCoeff=-0.0016;MLEAC=8;MLEAF=0.0016;MQ=31.56;MQRankSum=-0.157;QD=5.25;ReadPosRankSum=1.916;SOR=0.523
chr21	8444478	11256	28S	C	G,*	746.74	SNV	AC=1,15;AF=0.000232,0.00348;AN=4308;BaseQRankSum=0.310;ClippingRankSum=0.000;DP=170447;ExcessHet=3.1554;FS=0.000;InbreedingCoeff=0.0386;MLEAC=1,8;MLEAF=0.000232,0.00186;MQ=2.32;MQRankSum=0.822;QD=3.00;ReadPosRankSum=0.652;SOR=0.033
chr21	8444479	11257	28S	C	CCCCCCA,*	596.11	SNV	AC=2,14;AF=0.000466,0.00326;AN=4296;BaseQRankSum=0.050;ClippingRankSum=0.000;DP=170223;ExcessHet=3.1568;FS=0.000;InbreedingCoeff=0.0391;MLEAC=2,7;MLEAF=0.000466,0.00163;MQ=2.20;MQRankSum=-0.206;QD=2.46;ReadPosRankSum=1.695;SOR=0.033
chr21	8444480	11258	28S	C	CCCCCCA,CCCCCA	553.8	INDEL	AC=2,2;AF=0.000466,0.000466;AN=4292;BaseQRankSum=0.372;ClippingRankSum=0.000;DP=170925;ExcessHet=3.0176;FS=0.000;InbreedingCoeff=0.0422;MLEAC=1,2;MLEAF=0.000233,0.000466;MQ=4.59;MQRankSum=0.423;QD=4.16;ReadPosRankSum=-0.061;SOR=0.029
chr21	8217247	11259	28S	T	G	317.71	SNV	AC=34;AF=0.00679;AN=5008;BaseQRankSum=-1.607;ClippingRankSum=0.000;DP=282150;ExcessHet=138.8856;FS=0.000;InbreedingCoeff=-0.0705;MLEAC=18;MLEAF=0.00359;MQ=30.88;MQRankSum=0.636;QD=0.18;ReadPosRankSum=-1.340;SOR=0.252
chr21	8444482	11260	28S	C	CCCA,CCCCA,CCCG,CCTA,CCA,CCCCCA,CA	142625	INDEL	AC=254,174,12,2,18,4,4;AF=0.0587,0.0402,0.00277,0.000462,0.00416,0.000925,0.000925;AN=4326;BaseQRankSum=-0.655;ClippingRankSum=-0.000;DP=139730;ExcessHet=31.4853;FS=0.000;InbreedingCoeff=0.1794;MLEAC=251,173,12,2,17,4,4;MLEAF=0.058,0.04,0.00277,0.000462,0.00393,0.000925,0.000925;MQ=18.40;MQRankSum=-1.661;QD=9.87;ReadPosRankSum=1.205;SOR=0.677
chr21	8444483	11261	28S	C	G,A	4322.08	SNV	AC=2,2;AF=0.00045,0.00045;AN=4446;BaseQRankSum=0.303;ClippingRankSum=0.000;DP=165023;ExcessHet=0.0038;FS=0.000;InbreedingCoeff=0.0562;MLEAC=1,2;MLEAF=0.000225,0.00045;MQ=4.59;MQRankSum=1.183;QD=18.96;ReadPosRankSum=2.599;SOR=0.430
chr21	8444485	11263	28S	CCCA	ACCA,CGCCA,C	2168.68	INDEL	AC=19,3,9;AF=0.00424,0.00067,0.00201;AN=4480;BaseQRankSum=-0.674;ClippingRankSum=0.000;DP=158377;ExcessHet=0.0002;FS=0.000;InbreedingCoeff=0.1202;MLEAC=7,2,8;MLEAF=0.00156,0.000446,0.00179;MQ=9.56;MQRankSum=-0.126;QD=7.64;ReadPosRankSum=-0.000;SOR=0.014
chr21	8444486	11264	28S	CCA	C,ACA,*	30241.5	INDEL	AC=216,18,7;AF=0.0493,0.00411,0.0016;AN=4384;BaseQRankSum=-2.670;ClippingRankSum=0.000;DP=149552;ExcessHet=-0.0000;FS=0.000;InbreedingCoeff=0.3371;MLEAC=198,13,5;MLEAF=0.0452,0.00297,0.00114;MQ=15.21;MQRankSum=0.000;QD=11.23;ReadPosRankSum=0.253;SOR=0.149
chr21	8444487	11265	28S	CA	C,AA,*	898669	SNV	AC=1860,1,171;AF=0.582,0.000313,0.0535;AN=3196;BaseQRankSum=-2.209;ClippingRankSum=-0.000;DP=97151;ExcessHet=-0.0000;FS=0.000;InbreedingCoeff=0.3250;MLEAC=1919,1,148;MLEAF=0.6,0.000313,0.0463;MQ=15.88;MQRankSum=0.000;QD=26.38;ReadPosRankSum=0.430;SOR=1.171
chr21	8444488	11266	28S	A	C,*	773812	SNV	AC=222,1766;AF=0.0774,0.615;AN=2870;BaseQRankSum=0.373;ClippingRankSum=-0.000;DP=86854;ExcessHet=0.0000;FS=0.000;InbreedingCoeff=0.2427;MLEAC=168,1777;MLEAF=0.0585,0.619;MQ=6.23;MQRankSum=-0.000;QD=25.63;ReadPosRankSum=-0.967;SOR=0.291
chr21	8444491	11269	28S	C	CCA,CCCCCA,CCCCA	569.58	INDEL	AC=10,3,1;AF=0.00201,0.000604,0.000201;AN=4970;BaseQRankSum=0.000;ClippingRankSum=0.000;DP=139198;ExcessHet=3.0911;FS=0.000;InbreedingCoeff=0.0088;MLEAC=5,2,1;MLEAF=0.00101,0.000402,0.000201;MQ=22.67;MQRankSum=0.433;QD=1.84;ReadPosRankSum=-2.104;SOR=0.015
chr21	8444493	11271	28S	ACGTCT	CCGTCT,GCGTCT,A	75364.6	INDEL	AC=213,113,3;AF=0.184,0.0974,0.00259;AN=1160;BaseQRankSum=0.225;ClippingRankSum=0.000;DP=113300;ExcessHet=205.8272;FS=0.000;InbreedingCoeff=-0.0995;MLEAC=203,108,2;MLEAF=0.175,0.0931,0.00172;MQ=6.81;MQRankSum=-0.289;QD=10.36;ReadPosRankSum=-0.259;SOR=0.305
chr21	8444495	11273	28S	G	C,*	3860.34	SNV	AC=35,6;AF=0.0261,0.00448;AN=1340;BaseQRankSum=0.524;ClippingRankSum=0.000;DP=94962;ExcessHet=3.5561;FS=0.000;InbreedingCoeff=0.0908;MLEAC=34,5;MLEAF=0.0254,0.00373;MQ=2.81;MQRankSum=0.550;QD=11.16;ReadPosRankSum=-1.570;SOR=0.028
chr21	8444496	11274	28S	T	G,C,A,*	136505	SNV	AC=795,24,3,6;AF=0.456,0.0138,0.00172,0.00344;AN=1742;BaseQRankSum=-0.340;ClippingRankSum=-0.000;DP=74082;ExcessHet=885.1887;FS=0.000;InbreedingCoeff=-0.5519;MLEAC=792,18,2,4;MLEAF=0.455,0.0103,0.00115,0.0023;MQ=11.63;MQRankSum=0.164;QD=8.63;ReadPosRankSum=-0.676;SOR=1.569
chr21	8444498	11276	28S	T	G,C,*	10713.8	SNV	AC=26,21,6;AF=0.0163,0.0132,0.00377;AN=1592;BaseQRankSum=-0.628;ClippingRankSum=0.000;DP=87986;ExcessHet=16.6408;FS=0.000;InbreedingCoeff=0.2713;MLEAC=25,18,5;MLEAF=0.0157,0.0113,0.00314;MQ=3.80;MQRankSum=0.502;QD=15.18;ReadPosRankSum=-1.369;SOR=0.189
chr21	8444501	11279	28S	T	G,A	82177.7	SNV	AC=560,3;AF=0.345,0.00185;AN=1622;BaseQRankSum=-0.674;ClippingRankSum=0.000;DP=74156;ExcessHet=351.1564;FS=0.000;InbreedingCoeff=-0.2799;MLEAC=564,2;MLEAF=0.348,0.00123;MQ=10.18;MQRankSum=0.181;QD=7.78;ReadPosRankSum=-0.517;SOR=1.716
chr21	8217268	11280	28S	CGGCGGCGGTCGGCG	TGGCGGCGGTCGGCG,C	10017.4	SNV	AC=28,1;AF=0.00559,0.0002;AN=5008;BaseQRankSum=-1.564;ClippingRankSum=0.000;DP=255673;ExcessHet=3.3665;FS=0.000;InbreedingCoeff=-0.0047;MLEAC=26,1;MLEAF=0.00519,0.0002;MQ=31.51;MQRankSum=2.414;QD=2.55;ReadPosRankSum=-0.560;SOR=0.061
chr21	8444502	11280	28S	C	G	88.39	SNV	AC=4;AF=0.00135;AN=2958;DP=103224;ExcessHet=25.3793;FS=0.000;InbreedingCoeff=-0.0388;MLEAC=2;MLEAF=0.000676;MQ=0.31;QD=17.68;SOR=0.080
chr21	8217270	11282	28S	GCGGCGGT	G,*	2523.5	INDEL	AC=10,1;AF=0.002,0.0002;AN=5008;BaseQRankSum=0.331;ClippingRankSum=0.000;DP=253848;ExcessHet=3.0581;FS=0.000;InbreedingCoeff=-0.0021;MLEAC=8,1;MLEAF=0.0016,0.0002;MQ=30.04;MQRankSum=-1.084;QD=2.11;ReadPosRankSum=0.607;SOR=0.011
chr21	8217271	11283	28S	C	T,*	2621.67	SNV	AC=1,11;AF=0.0002,0.0022;AN=5008;BaseQRankSum=-0.379;ClippingRankSum=0.000;DP=253688;ExcessHet=3.0677;FS=0.000;InbreedingCoeff=-0.0022;MLEAC=1,9;MLEAF=0.0002,0.0018;MQ=9.24;MQRankSum=-0.170;QD=2.01;ReadPosRankSum=-0.858;SOR=0.011
chr21	8444509	11287	28S	G	A	105	SNV	AC=3;AF=0.000853;AN=3518;BaseQRankSum=1.282;ClippingRankSum=-0.000;DP=91204;ExcessHet=751.6862;FS=0.000;InbreedingCoeff=-0.2712;MLEAC=13;MLEAF=0.0037;MQ=0.56;MQRankSum=0.674;QD=9.55;ReadPosRankSum=0.598;SOR=0.330
chr21	8444510	11288	28S	C	G,T	441.47	SNV	AC=2,1;AF=0.000498,0.000249;AN=4016;BaseQRankSum=-2.359;ClippingRankSum=0.000;DP=105158;ExcessHet=3.0139;FS=0.000;InbreedingCoeff=0.0270;MLEAC=2,1;MLEAF=0.000498,0.000249;MQ=2.03;MQRankSum=0.530;QD=5.38;ReadPosRankSum=0.980;SOR=0.620
chr21	8217277	11289	28S	TCGGCGGG	GCGGCGGG,T,*	4183.11	SNV	AC=11,1,11;AF=0.0022,0.0002,0.0022;AN=5008;BaseQRankSum=-1.362;ClippingRankSum=0.000;DP=260359;ExcessHet=3.2405;FS=0.000;InbreedingCoeff=0.0128;MLEAC=9,1,9;MLEAF=0.0018,0.0002,0.0018;MQ=26.54;MQRankSum=0.659;QD=1.27;ReadPosRankSum=0.170;SOR=0.026
chr21	8444512	11290	28S	T	G	48911.2	SNV	AC=279;AF=0.165;AN=1688;BaseQRankSum=-0.672;ClippingRankSum=0.000;DP=87347;ExcessHet=315.5081;FS=42.397;InbreedingCoeff=-0.3895;MLEAC=316;MLEAF=0.187;MQ=9.39;MQRankSum=-0.434;QD=7.56;ReadPosRankSum=0.267;SOR=3.251
chr21	8444514	11292	28S	C	T	187.59	SNV	AC=4;AF=0.000836;AN=4784;BaseQRankSum=-1.602;ClippingRankSum=-0.000;DP=110557;ExcessHet=13.6960;FS=31.057;InbreedingCoeff=-0.0221;MLEAC=4;MLEAF=0.000836;MQ=3.93;MQRankSum=-0.524;QD=4.26;ReadPosRankSum=0.674;SOR=2.787
chr21	8217281	11293	28S	C	T,G,*	1592.57	SNV	AC=1,1,2;AF=0.0002,0.0002,0.000399;AN=5008;BaseQRankSum=1.077;ClippingRankSum=0.000;DP=251487;ExcessHet=3.0155;FS=0.000;InbreedingCoeff=-0.0003;MLEAC=1,1,2;MLEAF=0.0002,0.0002,0.000399;MQ=19.13;MQRankSum=4.710;QD=2.74;ReadPosRankSum=1.691;SOR=0.039
chr21	8217282	11294	28S	G	C,*	512.45	SNV	AC=1,2;AF=0.0002,0.000399;AN=5008;BaseQRankSum=-0.953;ClippingRankSum=0.000;DP=251217;ExcessHet=3.0129;FS=0.000;InbreedingCoeff=-0.0006;MLEAC=1,2;MLEAF=0.0002,0.000399;MQ=9.68;MQRankSum=-1.121;QD=1.46;ReadPosRankSum=-0.579;SOR=0.013
chr21	8444517	11295	28S	T	G	7857.37	SNV	AC=198;AF=0.0691;AN=2864;BaseQRankSum=-1.465;ClippingRankSum=0.000;DP=75602;ExcessHet=424.4981;FS=1.428;InbreedingCoeff=-0.2986;MLEAC=252;MLEAF=0.088;MQ=14.01;MQRankSum=0.327;QD=1.89;ReadPosRankSum=-0.171;SOR=0.855
chr21	8217284	11296	28S	G	T,*	2497.52	SNV	AC=9,1;AF=0.0018,0.0002;AN=5008;BaseQRankSum=-1.023;ClippingRankSum=0.000;DP=251490;ExcessHet=3.0494;FS=0.000;InbreedingCoeff=-0.0018;MLEAC=9,1;MLEAF=0.0018,0.0002;MQ=29.12;MQRankSum=0.000;QD=2.45;ReadPosRankSum=1.553;SOR=0.038
chr21	8217285	11297	28S	C	T,CGGCGG	7414.91	INDEL	AC=1,10;AF=0.0002,0.002;AN=5008;BaseQRankSum=-0.670;ClippingRankSum=0.000;DP=250297;ExcessHet=3.0582;FS=0.000;InbreedingCoeff=-0.0017;MLEAC=1,9;MLEAF=0.0002,0.0018;MQ=31.52;MQRankSum=0.382;QD=6.81;ReadPosRankSum=-0.925;SOR=0.059
chr21	8444525	11303	28S	G	T	2397.3	SNV	AC=11;AF=0.00221;AN=4982;BaseQRankSum=-0.623;ClippingRankSum=0.000;DP=123015;ExcessHet=0.0671;FS=69.976;InbreedingCoeff=0.0435;MLEAC=10;MLEAF=0.00201;MQ=31.86;MQRankSum=1.242;QD=9.48;ReadPosRankSum=-0.171;SOR=3.498
chr21	8444528	11306	28S	A	C,G	9518.14	SNV	AC=122,13;AF=0.0366,0.0039;AN=3332;BaseQRankSum=-1.303;ClippingRankSum=0.000;DP=104204;ExcessHet=66.0993;FS=80.332;InbreedingCoeff=0.0501;MLEAC=140,10;MLEAF=0.042,0.003;MQ=14.98;MQRankSum=-0.862;QD=2.65;ReadPosRankSum=0.614;SOR=4.314
chr21	8444533	11311	28S	T	G	13982.2	SNV	AC=219;AF=0.0593;AN=3692;BaseQRankSum=-1.174;ClippingRankSum=0.000;DP=95858;ExcessHet=596.2631;FS=84.473;InbreedingCoeff=-0.2781;MLEAC=236;MLEAF=0.0639;MQ=20.80;MQRankSum=-0.760;QD=2.43;ReadPosRankSum=0.436;SOR=2.442
chr21	8444535	11313	28S	GGGC	GGGCGGC,G	30208.7	INDEL	AC=129,3;AF=0.0261,0.000608;AN=4936;BaseQRankSum=0.673;ClippingRankSum=0.000;DP=111204;ExcessHet=2.2493;FS=13.140;InbreedingCoeff=0.0039;MLEAC=127,2;MLEAF=0.0257,0.000405;MQ=29.59;MQRankSum=1.673;QD=8.66;ReadPosRankSum=-0.822;SOR=2.686
chr21	8444538	11316	28S	C	T,*	4264.13	SNV	AC=28,3;AF=0.00565,0.000606;AN=4952;BaseQRankSum=-1.075;ClippingRankSum=0.000;DP=113174;ExcessHet=3.8409;FS=9.273;InbreedingCoeff=0.0703;MLEAC=26,2;MLEAF=0.00525,0.000404;MQ=26.93;MQRankSum=-1.275;QD=4.45;ReadPosRankSum=-0.210;SOR=2.065
chr21	8444540	11318	28S	GCGGCGGT	G,GCGGTCGGCGGT	2947.96	INDEL	AC=14,1;AF=0.00282,0.000201;AN=4970;BaseQRankSum=0.521;ClippingRankSum=0.000;DP=117201;ExcessHet=3.1054;FS=0.000;InbreedingCoeff=0.0054;MLEAC=11,1;MLEAF=0.00221,0.000201;MQ=31.30;MQRankSum=-0.000;QD=7.99;ReadPosRankSum=0.660;SOR=0.821
chr21	8444547	11325	28S	T	G,*	15519.8	SNV	AC=155,7;AF=0.035,0.00158;AN=4434;BaseQRankSum=-1.431;ClippingRankSum=0.000;DP=104126;ExcessHet=51.2198;FS=61.791;InbreedingCoeff=0.0486;MLEAC=134,5;MLEAF=0.0302,0.00113;MQ=27.42;MQRankSum=-0.537;QD=3.24;ReadPosRankSum=-0.474;SOR=0.339
chr21	8217317	11329	28S	ACCCCCCCGGC	ACCCCCCCCGGC,ACCCCCCGGC,A	11025.2	INDEL	AC=13,4,5;AF=0.0026,0.000799,0.000998;AN=5008;BaseQRankSum=-1.331;ClippingRankSum=0.000;DP=249030;ExcessHet=3.2179;FS=0.000;InbreedingCoeff=0.0082;MLEAC=12,3,5;MLEAF=0.0024,0.000599,0.000998;MQ=32.27;MQRankSum=0.958;QD=3.47;ReadPosRankSum=-0.126;SOR=1.154
chr21	8217318	11330	28S	C	T,A,*	5302.64	SNV	AC=1,3,9;AF=0.0002,0.000599,0.0018;AN=5006;BaseQRankSum=-2.612;ClippingRankSum=0.000;DP=245293;ExcessHet=3.0786;FS=0.000;InbreedingCoeff=-0.0000;MLEAC=1,3,8;MLEAF=0.0002,0.000599,0.0016;MQ=18.57;MQRankSum=2.835;QD=2.36;ReadPosRankSum=-0.116;SOR=1.199
chr21	8217319	11331	28S	C	A,*	2705.9	SNV	AC=3,5;AF=0.000599,0.000998;AN=5008;BaseQRankSum=-3.172;ClippingRankSum=0.000;DP=243423;ExcessHet=3.0346;FS=0.000;InbreedingCoeff=-0.0014;MLEAC=3,5;MLEAF=0.000599,0.000998;MQ=19.13;MQRankSum=3.572;QD=1.92;ReadPosRankSum=-0.766;SOR=0.680
chr21	8444554	11332	28S	G	T,*	975.55	SNV	AC=1,3;AF=0.000201,0.000603;AN=4972;BaseQRankSum=0.255;ClippingRankSum=0.000;DP=119582;ExcessHet=3.0159;FS=2.418;InbreedingCoeff=0.0119;MLEAC=1,3;MLEAF=0.000201,0.000603;MQ=19.79;MQRankSum=0.034;QD=15.73;ReadPosRankSum=0.590;SOR=1.288
chr21	8444555	11333	28S	C	T,CGGCGG,*	3238.16	INDEL	AC=3,14,2;AF=0.000603,0.00281,0.000402;AN=4974;BaseQRankSum=-0.743;ClippingRankSum=0.000;DP=115584;ExcessHet=0.0908;FS=4.290;InbreedingCoeff=0.0799;MLEAC=3,12,2;MLEAF=0.000603,0.00241,0.000402;MQ=29.33;MQRankSum=0.254;QD=4.96;ReadPosRankSum=-0.231;SOR=0.178
chr21	8217331	11343	28S	G	A	2420.62	SNV	AC=3;AF=0.000599;AN=5008;BaseQRankSum=-1.036;ClippingRankSum=0.000;DP=242659;ExcessHet=3.2910;FS=0.000;InbreedingCoeff=-0.0031;MLEAC=3;MLEAF=0.000599;MQ=32.28;MQRankSum=3.901;QD=4.95;ReadPosRankSum=0.228;SOR=0.101
chr21	8444565	11343	28S	G	T	298.17	SNV	AC=3;AF=0.000602;AN=4982;BaseQRankSum=-0.273;ClippingRankSum=0.000;DP=124597;ExcessHet=3.0155;FS=4.490;InbreedingCoeff=-0.0030;MLEAC=2;MLEAF=0.000401;MQ=28.19;MQRankSum=1.548;QD=2.98;ReadPosRankSum=0.676;SOR=1.577
chr21	8444567	11345	28S	G	C,T	1054.5	SNV	AC=1,5;AF=0.000201,0.001;AN=4984;BaseQRankSum=0.198;ClippingRankSum=0.000;DP=125306;ExcessHet=3.0236;FS=0.000;InbreedingCoeff=0.0028;MLEAC=1,4;MLEAF=0.000201,0.000803;MQ=33.27;MQRankSum=1.098;QD=3.59;ReadPosRankSum=0.704;SOR=1.833
chr21	8444568	11346	28S	C	A,T	820.12	SNV	AC=2,1;AF=0.000401,0.000201;AN=4982;BaseQRankSum=1.451;ClippingRankSum=0.000;DP=124903;ExcessHet=3.0135;FS=2.305;InbreedingCoeff=0.0305;MLEAC=2,1;MLEAF=0.000401,0.000201;MQ=32.96;MQRankSum=1.752;QD=5.94;ReadPosRankSum=1.337;SOR=1.445
chr21	8217335	11347	28S	G	GC	49964.8	SNV	AC=56;AF=0.0112;AN=5008;BaseQRankSum=0.074;ClippingRankSum=0.000;DP=241567;ExcessHet=5.3070;FS=0.000;InbreedingCoeff=-0.0133;MLEAC=55;MLEAF=0.011;MQ=32.65;MQRankSum=2.993;QD=5.50;ReadPosRankSum=0.808;SOR=0.116
chr21	8217336	11348	28S	C	T	3502.62	SNV	AC=4;AF=0.000801;AN=4996;BaseQRankSum=0.328;ClippingRankSum=0.000;DP=242158;ExcessHet=4.6901;FS=0.000;InbreedingCoeff=-0.0069;MLEAC=4;MLEAF=0.000801;MQ=18.48;MQRankSum=0.822;QD=7.34;ReadPosRankSum=-0.152;SOR=0.117
chr21	8444571	11349	28S	T	G	2902.15	SNV	AC=11;AF=0.00223;AN=4936;BaseQRankSum=-1.999;ClippingRankSum=0.000;DP=130203;ExcessHet=689.8903;FS=14.518;InbreedingCoeff=-0.1892;MLEAC=3;MLEAF=0.000608;MQ=30.56;MQRankSum=0.271;QD=10.67;ReadPosRankSum=-0.196;SOR=0.007
chr21	8444574	11352	28S	G	T,C	1841.04	SNV	AC=2,1;AF=0.000401,0.000201;AN=4984;BaseQRankSum=-1.655;ClippingRankSum=0.000;DP=135942;ExcessHet=3.0130;FS=0.000;InbreedingCoeff=0.0070;MLEAC=2,1;MLEAF=0.000401,0.000201;MQ=29.87;MQRankSum=1.859;QD=9.54;ReadPosRankSum=0.300;SOR=0.467
chr21	8444575	11353	28S	TCCCCCCGCCCTAC	GCCCCCCGCCCTAC,T	3286.07	SNV	AC=41,3;AF=0.00825,0.000604;AN=4968;BaseQRankSum=-1.622;ClippingRankSum=0.000;DP=131220;ExcessHet=4.3990;FS=0.000;InbreedingCoeff=0.0541;MLEAC=20,3;MLEAF=0.00403,0.000604;MQ=31.15;MQRankSum=0.587;QD=3.13;ReadPosRankSum=0.000;SOR=0.402
chr21	8217343	11355	28S	T	G,C	1163.11	SNV	AC=13,1;AF=0.0026,0.0002;AN=5008;BaseQRankSum=-2.837;ClippingRankSum=0.000;DP=239684;ExcessHet=3.0941;FS=0.000;InbreedingCoeff=0.0072;MLEAC=8,1;MLEAF=0.0016,0.0002;MQ=31.79;MQRankSum=0.925;QD=1.11;ReadPosRankSum=0.589;SOR=0.016
chr21	8217344	11356	28S	TC	T	221.31	SNV	AC=3;AF=0.000599;AN=5008;BaseQRankSum=-2.043;ClippingRankSum=0.000;DP=211328;ExcessHet=3.3366;FS=0.000;InbreedingCoeff=-0.0037;MLEAC=2;MLEAF=0.000399;MQ=31.95;MQRankSum=1.001;QD=1.59;ReadPosRankSum=0.942;SOR=0.005
chr21	8444580	11358	28S	C	A,*	835.31	SNV	AC=1,3;AF=0.000201,0.000602;AN=4986;BaseQRankSum=0.516;ClippingRankSum=0.000;DP=138330;ExcessHet=3.0156;FS=0.000;InbreedingCoeff=0.0046;MLEAC=1,3;MLEAF=0.000201,0.000602;MQ=18.97;MQRankSum=-0.409;QD=4.20;ReadPosRankSum=0.567;SOR=0.218
chr21	8217348	11360	28S	C	T	7328.83	SNV	AC=8;AF=0.0016;AN=5008;BaseQRankSum=-2.459;ClippingRankSum=0.000;DP=207545;ExcessHet=3.0346;FS=0.000;InbreedingCoeff=-0.0016;MLEAC=8;MLEAF=0.0016;MQ=33.18;MQRankSum=0.833;QD=5.07;ReadPosRankSum=1.132;SOR=0.104
chr21	8444587	11365	28S	ACCCCCCCGGC	ACCCCCCCCGGC,AC,ACCCCCCGGC,A,*	8697.55	INDEL	AC=6,1,11,4,4;AF=0.00121,0.000201,0.00221,0.000804,0.000804;AN=4976;BaseQRankSum=-1.948;ClippingRankSum=0.000;DP=141583;ExcessHet=3.4023;FS=0.000;InbreedingCoeff=0.1645;MLEAC=6,1,11,4,4;MLEAF=0.00121,0.000201,0.00221,0.000804,0.000804;MQ=30.13;MQRankSum=0.594;QD=6.97;ReadPosRankSum=-0.096;SOR=0.311
chr21	8444588	11366	28S	C	A,*	6720.2	SNV	AC=1,20;AF=0.000201,0.00401;AN=4984;BaseQRankSum=-1.338;ClippingRankSum=0.000;DP=144550;ExcessHet=3.1963;FS=0.000;InbreedingCoeff=0.0036;MLEAC=1,20;MLEAF=0.000201,0.00401;MQ=12.59;MQRankSum=0.416;QD=6.02;ReadPosRankSum=-0.341;SOR=0.726
chr21	8444589	11367	28S	C	A,*	2570.18	SNV	AC=3,6;AF=0.000602,0.0012;AN=4984;BaseQRankSum=-2.223;ClippingRankSum=0.000;DP=145042;ExcessHet=3.0422;FS=0.000;InbreedingCoeff=0.0014;MLEAC=2,6;MLEAF=0.000401,0.0012;MQ=13.13;MQRankSum=-0.066;QD=7.06;ReadPosRankSum=-0.390;SOR=0.533
chr21	8217360	11372	28S	G	C	4430.89	SNV	AC=7;AF=0.0014;AN=5008;BaseQRankSum=0.653;ClippingRankSum=0.000;DP=188878;ExcessHet=3.0285;FS=0.000;InbreedingCoeff=-0.0014;MLEAC=7;MLEAF=0.0014;MQ=33.87;MQRankSum=1.716;QD=2.68;ReadPosRankSum=0.737;SOR=0.045
chr21	8217363	11375	28S	CGCGGCG	CGCG,C,CGCGGCGGCG	15127.6	INDEL	AC=44,6,2;AF=0.00879,0.0012,0.000399;AN=5008;BaseQRankSum=0.497;ClippingRankSum=0.000;DP=185671;ExcessHet=0.6127;FS=0.000;InbreedingCoeff=0.0229;MLEAC=38,6,2;MLEAF=0.00759,0.0012,0.000399;MQ=32.11;MQRankSum=-1.946;QD=4.86;ReadPosRankSum=0.736;SOR=0.020
chr21	8444597	11375	28S	C	G,*	1863.2	SNV	AC=1,4;AF=0.0002,0.000802;AN=4988;BaseQRankSum=0.595;ClippingRankSum=0.000;DP=147002;ExcessHet=3.0191;FS=0.000;InbreedingCoeff=0.0011;MLEAC=1,4;MLEAF=0.0002,0.000802;MQ=16.18;MQRankSum=-0.545;QD=5.75;ReadPosRankSum=0.674;SOR=0.144
chr21	8217367	11379	28S	G	T,*	5670.85	SNV	AC=1,6;AF=0.0002,0.0012;AN=5006;BaseQRankSum=-1.299;ClippingRankSum=0.000;DP=179491;ExcessHet=3.0288;FS=0.000;InbreedingCoeff=0.0017;MLEAC=1,6;MLEAF=0.0002,0.0012;MQ=16.51;MQRankSum=0.073;QD=8.07;ReadPosRankSum=4.308;SOR=0.074
chr21	8217371	11383	28S	CGGCGGCG	C	937.98	INDEL	AC=4;AF=0.000799;AN=5006;BaseQRankSum=0.390;ClippingRankSum=0.000;DP=172031;ExcessHet=3.0233;FS=0.000;InbreedingCoeff=-0.0025;MLEAC=3;MLEAF=0.000599;MQ=29.93;MQRankSum=0.579;QD=10.20;ReadPosRankSum=1.112;SOR=0.032
chr21	8444605	11383	28S	G	GC	4472.22	SNV	AC=15;AF=0.00301;AN=4988;BaseQRankSum=0.000;ClippingRankSum=0.000;DP=152614;ExcessHet=3.2723;FS=0.000;InbreedingCoeff=-0.0051;MLEAC=14;MLEAF=0.00281;MQ=28.91;MQRankSum=-0.615;QD=3.75;ReadPosRankSum=1.391;SOR=0.217
chr21	8217373	11385	28S	G	T,*	1083.78	SNV	AC=1,5;AF=0.0002,0.000999;AN=5006;BaseQRankSum=-1.737;ClippingRankSum=0.000;DP=171862;ExcessHet=3.0234;FS=0.000;InbreedingCoeff=0.0002;MLEAC=1,4;MLEAF=0.0002,0.000799;MQ=17.94;MQRankSum=3.236;QD=6.77;ReadPosRankSum=1.128;SOR=0.088
chr21	8217377	11389	28S	CG	C,CAG,*	12034.3	SNV	AC=63,6,5;AF=0.0126,0.0012,0.001;AN=5000;BaseQRankSum=0.323;ClippingRankSum=0.000;DP=170058;ExcessHet=1.3482;FS=0.000;InbreedingCoeff=0.0137;MLEAC=60,6,4;MLEAF=0.012,0.0012,0.0008;MQ=31.86;MQRankSum=-2.484;QD=4.47;ReadPosRankSum=-2.626;SOR=0.226
chr21	8217378	11390	28S	G	A,GGC,GTCGGCGGCA,GGGC,*	734320	SNV	AC=956,6,1,4,25;AF=0.191,0.0012,0.0002,0.000801,0.005;AN=4996;BaseQRankSum=-1.587;ClippingRankSum=0.000;DP=162600;ExcessHet=255.6427;FS=0.000;InbreedingCoeff=-0.1565;MLEAC=955,6,1,3,24;MLEAF=0.191,0.0012,0.0002,0.0006,0.0048;MQ=33.57;MQRankSum=-2.036;QD=8.90;ReadPosRankSum=0.522;SOR=1.238
chr21	8444613	11391	28S	T	G	3955.64	SNV	AC=144;AF=0.0289;AN=4986;BaseQRankSum=-1.963;ClippingRankSum=0.000;DP=186074;ExcessHet=257.4660;FS=0.000;InbreedingCoeff=-0.1173;MLEAC=118;MLEAF=0.0237;MQ=29.75;MQRankSum=0.284;QD=0.51;ReadPosRankSum=-0.773;SOR=0.034
chr21	8444618	11396	28S	C	T	2058.91	SNV	AC=7;AF=0.0014;AN=4996;BaseQRankSum=0.516;ClippingRankSum=0.000;DP=133660;ExcessHet=3.0495;FS=0.000;InbreedingCoeff=0.0053;MLEAC=7;MLEAF=0.0014;MQ=25.87;MQRankSum=-0.950;QD=5.56;ReadPosRankSum=-0.866;SOR=0.209
chr21	8217385	11397	28S	G	A	1039.2	SNV	AC=21;AF=0.0042;AN=5002;BaseQRankSum=0.000;ClippingRankSum=0.000;DP=108165;ExcessHet=3.2310;FS=0.000;InbreedingCoeff=-0.0058;MLEAC=15;MLEAF=0.003;MQ=33.24;MQRankSum=-2.345;QD=2.17;ReadPosRankSum=-2.289;SOR=0.027
chr21	8217387	11399	28S	A	G	9696.48	SNV	AC=30;AF=0.00601;AN=4992;BaseQRankSum=0.967;ClippingRankSum=0.000;DP=106925;ExcessHet=6.4177;FS=0.000;InbreedingCoeff=-0.0145;MLEAC=30;MLEAF=0.00601;MQ=34.47;MQRankSum=0.008;QD=4.76;ReadPosRankSum=-0.010;SOR=0.023
chr21	8444627	11405	28S	T	G	1589.38	SNV	AC=3;AF=0.000601;AN=4990;BaseQRankSum=-1.718;ClippingRankSum=0.000;DP=135075;ExcessHet=7.6807;FS=0.000;InbreedingCoeff=-0.0146;MLEAC=2;MLEAF=0.000401;MQ=28.42;MQRankSum=0.704;QD=5.76;ReadPosRankSum=-0.114;SOR=0.010
chr21	8444630	11408	28S	G	C	1159.61	SNV	AC=5;AF=0.001;AN=4998;BaseQRankSum=0.385;ClippingRankSum=0.000;DP=123202;ExcessHet=3.0190;FS=0.000;InbreedingCoeff=0.0034;MLEAC=5;MLEAF=0.001;MQ=25.55;MQRankSum=-0.712;QD=1.94;ReadPosRankSum=-0.484;SOR=0.054
chr21	8444632	11410	28S	G	A	867.61	SNV	AC=4;AF=0.0008;AN=4998;BaseQRankSum=-2.132;ClippingRankSum=0.000;DP=123018;ExcessHet=3.0233;FS=0.000;InbreedingCoeff=-0.0019;MLEAC=4;MLEAF=0.0008;MQ=28.99;MQRankSum=1.920;QD=1.98;ReadPosRankSum=1.532;SOR=0.059
chr21	8217400	11412	28S	CGGTCCCCCCCGCCG	C	3201.92	INDEL	AC=16;AF=0.0032;AN=4998;BaseQRankSum=0.516;ClippingRankSum=0.000;DP=99197;ExcessHet=3.1594;FS=0.000;InbreedingCoeff=-0.0063;MLEAC=16;MLEAF=0.0032;MQ=34.41;MQRankSum=0.454;QD=3.94;ReadPosRankSum=-0.044;SOR=0.030
chr21	8217403	11415	28S	T	TC,*	45478.9	SNV	AC=103,16;AF=0.0206,0.0032;AN=5000;BaseQRankSum=-0.668;ClippingRankSum=0.000;DP=97728;ExcessHet=9.5298;FS=0.000;InbreedingCoeff=-0.0152;MLEAC=99,16;MLEAF=0.0198,0.0032;MQ=32.63;MQRankSum=0.847;QD=6.70;ReadPosRankSum=0.510;SOR=0.086
chr21	8217404	11416	28S	C	T,*	33898.8	SNV	AC=59,16;AF=0.0119,0.00322;AN=4968;BaseQRankSum=-1.333;ClippingRankSum=0.000;DP=94206;ExcessHet=0.0480;FS=0.000;InbreedingCoeff=0.0443;MLEAC=58,15;MLEAF=0.0117,0.00302;MQ=28.51;MQRankSum=-1.842;QD=6.39;ReadPosRankSum=0.241;SOR=0.116
chr21	8217406	11418	28S	C	T,*	4184.16	SNV	AC=3,16;AF=0.0006,0.0032;AN=5000;BaseQRankSum=0.000;ClippingRankSum=0.000;DP=87030;ExcessHet=3.1605;FS=0.000;InbreedingCoeff=-0.0011;MLEAC=2,16;MLEAF=0.0004,0.0032;MQ=18.23;MQRankSum=0.136;QD=4.54;ReadPosRankSum=-0.041;SOR=0.031
chr21	8217412	11424	28S	C	G,*	3339.1	SNV	AC=1,16;AF=0.0002,0.0032;AN=4998;BaseQRankSum=0.538;ClippingRankSum=0.000;DP=84643;ExcessHet=3.1297;FS=0.000;InbreedingCoeff=-0.0004;MLEAC=1,16;MLEAF=0.0002,0.0032;MQ=8.90;MQRankSum=-0.037;QD=3.91;ReadPosRankSum=0.974;SOR=0.029
chr21	8217414	11426	28S	G	A,*	3452.75	SNV	AC=1,16;AF=0.0002,0.0032;AN=5000;BaseQRankSum=0.000;ClippingRankSum=0.000;DP=84478;ExcessHet=3.1295;FS=0.000;InbreedingCoeff=-0.0005;MLEAC=1,16;MLEAF=0.0002,0.0032;MQ=10.04;MQRankSum=0.857;QD=4.01;ReadPosRankSum=0.501;SOR=0.032
chr21	8444657	11435	28S	A	G	9634.22	SNV	AC=22;AF=0.0044;AN=5004;BaseQRankSum=0.697;ClippingRankSum=0.000;DP=123859;ExcessHet=3.4150;FS=0.000;InbreedingCoeff=-0.0060;MLEAC=22;MLEAF=0.0044;MQ=27.28;MQRankSum=-0.335;QD=4.49;ReadPosRankSum=0.598;SOR=0.068
chr21	8444670	11448	28S	CGGTCCCCCCCGCCG	C	5864.79	INDEL	AC=7;AF=0.0014;AN=5004;BaseQRankSum=0.513;ClippingRankSum=0.000;DP=120945;ExcessHet=3.0346;FS=0.000;InbreedingCoeff=-0.0020;MLEAC=7;MLEAF=0.0014;MQ=31.03;MQRankSum=-0.032;QD=7.40;ReadPosRankSum=0.306;SOR=0.087
chr21	8444673	11451	28S	T	TC,TCC,*	58028.3	INDEL	AC=92,4,7;AF=0.0184,0.000799,0.0014;AN=5004;BaseQRankSum=-0.454;ClippingRankSum=0.000;DP=123714;ExcessHet=7.6937;FS=0.000;InbreedingCoeff=-0.0168;MLEAC=89,4,7;MLEAF=0.0178,0.000799,0.0014;MQ=28.22;MQRankSum=-0.911;QD=4.79;ReadPosRankSum=0.357;SOR=0.098
chr21	8217441	11453	28S	C	T	1199.99	SNV	AC=4;AF=0.000802;AN=4988;BaseQRankSum=-0.123;ClippingRankSum=-0.000;DP=69879;ExcessHet=0.0065;FS=0.000;InbreedingCoeff=0.0524;MLEAC=4;MLEAF=0.000802;MQ=34.42;MQRankSum=1.208;QD=10.81;ReadPosRankSum=0.665;SOR=0.546
chr21	8444676	11454	28S	C	T,*	6606.2	SNV	AC=2,7;AF=0.0004,0.0014;AN=5002;BaseQRankSum=0.000;ClippingRankSum=0.000;DP=113189;ExcessHet=3.0417;FS=0.000;InbreedingCoeff=-0.0011;MLEAC=2,7;MLEAF=0.0004,0.0014;MQ=16.93;MQRankSum=0.231;QD=6.16;ReadPosRankSum=0.964;SOR=0.065
chr21	8444679	11457	28S	C	A,*	6024.02	SNV	AC=1,7;AF=0.0002,0.0014;AN=5002;BaseQRankSum=-0.654;ClippingRankSum=0.000;DP=112734;ExcessHet=3.0347;FS=0.000;InbreedingCoeff=-0.0009;MLEAC=1,7;MLEAF=0.0002,0.0014;MQ=12.57;MQRankSum=-2.976;QD=5.77;ReadPosRankSum=0.361;SOR=0.068
chr21	8444680	11458	28S	C	A,*	6330.27	SNV	AC=1,7;AF=0.0002,0.0014;AN=5002;BaseQRankSum=0.870;ClippingRankSum=0.000;DP=112503;ExcessHet=3.0347;FS=0.000;InbreedingCoeff=-0.0008;MLEAC=1,7;MLEAF=0.0002,0.0014;MQ=14.87;MQRankSum=1.124;QD=6.10;ReadPosRankSum=0.761;SOR=0.070
chr21	8444684	11462	28S	G	A,*	6081.01	SNV	AC=1,7;AF=0.0002,0.0014;AN=5002;BaseQRankSum=0.741;ClippingRankSum=0.000;DP=112202;ExcessHet=3.0347;FS=0.000;InbreedingCoeff=-0.0009;MLEAC=1,7;MLEAF=0.0002,0.0014;MQ=7.02;MQRankSum=0.555;QD=6.90;ReadPosRankSum=-0.207;SOR=0.084
chr21	8217462	11474	28S	G	T	1942.98	SNV	AC=7;AF=0.00141;AN=4974;BaseQRankSum=0.000;ClippingRankSum=-0.000;DP=57549;ExcessHet=3.0497;FS=0.000;InbreedingCoeff=-0.0120;MLEAC=7;MLEAF=0.00141;MQ=34.55;MQRankSum=0.326;QD=6.39;ReadPosRankSum=-0.534;SOR=0.174
chr21	8444711	11489	28S	C	T	579.84	SNV	AC=3;AF=0.0006;AN=5000;BaseQRankSum=-0.209;ClippingRankSum=0.000;DP=108226;ExcessHet=3.0129;FS=0.000;InbreedingCoeff=-0.0014;MLEAC=2;MLEAF=0.0004;MQ=24.15;MQRankSum=-0.337;QD=3.45;ReadPosRankSum=-0.380;SOR=0.129
chr21	8217496	11508	28S	A	G	732.8	SNV	AC=12;AF=0.00264;AN=4548;BaseQRankSum=-0.000;ClippingRankSum=0.000;DP=20414;ExcessHet=3.6180;FS=0.000;InbreedingCoeff=-0.0868;MLEAC=15;MLEAF=0.0033;MQ=27.85;MQRankSum=0.089;QD=4.76;ReadPosRankSum=-0.213;SOR=0.171
chr21	8444732	11510	28S	G	T	1704.04	SNV	AC=8;AF=0.0016;AN=4996;BaseQRankSum=0.000;ClippingRankSum=0.000;DP=104291;ExcessHet=3.0347;FS=0.000;InbreedingCoeff=-0.0029;MLEAC=8;MLEAF=0.0016;MQ=26.73;MQRankSum=-0.544;QD=3.32;ReadPosRankSum=-0.551;SOR=0.110
chr21	8444766	11544	28S	A	G	772.91	SNV	AC=12;AF=0.00242;AN=4954;BaseQRankSum=0.000;ClippingRankSum=0.000;DP=72559;ExcessHet=3.1770;FS=0.000;InbreedingCoeff=-0.0130;MLEAC=11;MLEAF=0.00222;MQ=26.43;MQRankSum=0.453;QD=2.27;ReadPosRankSum=0.715;SOR=0.062
chr21	8401975	12940	28S	T	G	110.63	SNV	AC=8;AF=0.014;AN=572;DP=721;ExcessHet=0.0000;FS=0.000;InbreedingCoeff=-0.1141;MLEAC=8;MLEAF=0.014;MQ=4.53;QD=55.31;SOR=3.611
chr21	8401980	12945	28S	CCGCGCGCGCG	CCGCGCG,CCG,CCGCGCGCG,C,CCGCG	4842.41	INDEL	AC=37,12,13,5,18;AF=0.0566,0.0183,0.0199,0.00765,0.0275;AN=654;BaseQRankSum=-0.000;ClippingRankSum=-0.000;DP=768;ExcessHet=0.1830;FS=0.000;InbreedingCoeff=0.5955;MLEAC=22,6,8,4,14;MLEAF=0.0336,0.00917,0.0122,0.00612,0.0214;MQ=20.54;MQRankSum=-0.000;QD=51.52;ReadPosRankSum=-0.319;SOR=3.651
chr21	8401981	12946	28S	C	CGG,T,*	4771.64	SNV	AC=4,4,87;AF=0.00625,0.00625,0.136;AN=640;DP=773;ExcessHet=0.0000;FS=0.000;InbreedingCoeff=0.4799;MLEAC=2,2,65;MLEAF=0.00313,0.00313,0.102;MQ=6.36;QD=43.38;SOR=3.947
chr21	8401993	12958	3'ETS	C	T,*	464.35	SNV	AC=4,3;AF=0.00248,0.00186;AN=1610;DP=1530;ExcessHet=0.0000;FS=0.000;InbreedingCoeff=0.1120;MLEAC=2,2;MLEAF=0.00124,0.00124;MQ=9.85;QD=29.02;SOR=3.258
chr21	8401994	12959	3'ETS	G	GCC	984.94	INDEL	AC=10;AF=0.00595;AN=1680;BaseQRankSum=0.431;ClippingRankSum=-0.000;DP=1628;ExcessHet=0.0000;FS=0.000;InbreedingCoeff=-0.1251;MLEAC=7;MLEAF=0.00417;MQ=16.26;MQRankSum=0.598;QD=46.90;ReadPosRankSum=1.282;SOR=1.893
chr21	8401995	12960	3'ETS	C	T,CGT	6893.8	SNV	AC=122,4;AF=0.137,0.0045;AN=888;BaseQRankSum=-0.000;ClippingRankSum=-0.000;DP=1739;ExcessHet=0.0000;FS=0.000;InbreedingCoeff=0.3911;MLEAC=93,2;MLEAF=0.105,0.00225;MQ=14.38;MQRankSum=-0.000;QD=44.48;ReadPosRankSum=0.431;SOR=4.407
chr21	8401997	12962	3'ETS	C	CGT	464.76	INDEL	AC=4;AF=0.002;AN=2002;DP=1979;ExcessHet=0.0000;FS=0.000;InbreedingCoeff=-0.1317;MLEAC=2;MLEAF=0.000999;MQ=9.38;QD=51.64;SOR=2.833
chr21	8401999	12964	3'ETS	C	T,CGT	13197.1	SNV	AC=250,4;AF=0.364,0.00583;AN=686;BaseQRankSum=-0.000;ClippingRankSum=-0.000;DP=2197;ExcessHet=0.0000;FS=0.000;InbreedingCoeff=0.5286;MLEAC=172,2;MLEAF=0.251,0.00292;MQ=15.58;MQRankSum=-0.431;QD=39.04;ReadPosRankSum=0.489;SOR=4.638
chr21	8402005	12970	3'ETS	C	CG	188.39	SNV	AC=4;AF=0.00146;AN=2746;DP=3202;ExcessHet=0.0000;FS=0.000;InbreedingCoeff=-0.1217;MLEAC=1;MLEAF=0.000364;MQ=13.94;QD=47.10;SOR=3.258
chr21	8402056	13021	3'ETS	T	A	106.52	SNV	AC=3;AF=0.000686;AN=4370;BaseQRankSum=-0.000;ClippingRankSum=-0.000;DP=16314;ExcessHet=0.2106;FS=0.000;InbreedingCoeff=-0.0532;MLEAC=2;MLEAF=0.000458;MQ=14.61;MQRankSum=-0.000;QD=9.68;ReadPosRankSum=-1.834;SOR=1.270
chr21	8402064	13029	3'ETS	CCTCCCGGCCT	C	711.02	INDEL	AC=6;AF=0.00142;AN=4228;BaseQRankSum=-0.000;ClippingRankSum=0.000;DP=19086;ExcessHet=3.0671;FS=0.000;InbreedingCoeff=-0.0530;MLEAC=5;MLEAF=0.00118;MQ=16.09;MQRankSum=-0.674;QD=14.51;ReadPosRankSum=-0.337;SOR=0.296
chr21	8402065	13030	3'ETS	C	T,*	970.31	SNV	AC=5,6;AF=0.00118,0.00142;AN=4224;BaseQRankSum=-1.207;ClippingRankSum=0.000;DP=19445;ExcessHet=3.0778;FS=0.000;InbreedingCoeff=0.0367;MLEAC=4,5;MLEAF=0.000947,0.00118;MQ=14.62;MQRankSum=0.126;QD=8.59;ReadPosRankSum=1.036;SOR=0.214
chr21	8402092	13057	3'ETS	CGTGGTG	C,CGTGGTGGTG,CGTGGTGGTGGTG	1313.53	INDEL	AC=7,7,5;AF=0.00166,0.00166,0.00119;AN=4212;BaseQRankSum=0.000;ClippingRankSum=0.000;DP=30854;ExcessHet=0.1020;FS=0.000;InbreedingCoeff=0.0894;MLEAC=6,6,4;MLEAF=0.00142,0.00142,0.00095;MQ=19.77;MQRankSum=0.327;QD=6.88;ReadPosRankSum=0.317;SOR=0.044
chr21	8402097	13062	3'ETS	T	G,TGGG	23613.4	SNV	AC=171,1;AF=0.0408,0.000238;AN=4196;BaseQRankSum=-0.967;ClippingRankSum=0.000;DP=32356;ExcessHet=0.0000;FS=0.000;InbreedingCoeff=0.0843;MLEAC=158,1;MLEAF=0.0377,0.000238;MQ=33.81;MQRankSum=0.360;QD=10.79;ReadPosRankSum=0.650;SOR=0.037
chr21	8402100	13065	3'ETS	TGGGGGTGTGG	TGGGGGGTGTGG,T	1466.61	INDEL	AC=12,2;AF=0.00282,0.00047;AN=4256;BaseQRankSum=-1.282;ClippingRankSum=0.000;DP=35360;ExcessHet=3.1262;FS=0.000;InbreedingCoeff=0.0425;MLEAC=9,2;MLEAF=0.00211,0.00047;MQ=30.79;MQRankSum=-0.085;QD=8.89;ReadPosRankSum=0.543;SOR=0.007
chr21	8402102	13067	3'ETS	GGGGTGT	G,*	1182.06	INDEL	AC=4,5;AF=0.000922,0.00115;AN=4340;BaseQRankSum=-0.126;ClippingRankSum=0.000;DP=36835;ExcessHet=3.0523;FS=0.000;InbreedingCoeff=0.0359;MLEAC=4,5;MLEAF=0.000922,0.00115;MQ=13.47;MQRankSum=1.077;QD=7.93;ReadPosRankSum=0.134;SOR=0.077
chr21	8402103	13068	3'ETS	GGGTGT	TGGTGT,G,*	1938.57	SNV	AC=8,5,7;AF=0.00183,0.00114,0.0016;AN=4370;BaseQRankSum=-0.000;ClippingRankSum=0.000;DP=37214;ExcessHet=0.1072;FS=0.000;InbreedingCoeff=0.0760;MLEAC=8,3,7;MLEAF=0.00183,0.000686,0.0016;MQ=18.63;MQRankSum=0.720;QD=7.34;ReadPosRankSum=-0.116;SOR=0.072
chr21	8402104	13069	3'ETS	GGT	G,*	76074.8	INDEL	AC=585,10;AF=0.135,0.00231;AN=4322;BaseQRankSum=-0.000;ClippingRankSum=0.000;DP=34414;ExcessHet=-0.0000;FS=0.000;InbreedingCoeff=0.1525;MLEAC=553,9;MLEAF=0.128,0.00208;MQ=34.03;MQRankSum=-0.842;QD=11.86;ReadPosRankSum=-0.097;SOR=0.238
chr21	8402105	13070	3'ETS	G	GT,T,*	69837.2	SNV	AC=8,1,549;AF=0.00185,0.000232,0.127;AN=4318;BaseQRankSum=0.000;ClippingRankSum=-0.000;DP=34268;ExcessHet=0.0000;FS=0.000;InbreedingCoeff=0.2187;MLEAC=6,1,497;MLEAF=0.00139,0.000232,0.115;MQ=14.17;MQRankSum=-0.660;QD=12.10;ReadPosRankSum=0.524;SOR=0.158
chr21	8402106	13071	3'ETS	T	TG,G,TGGGG,TGG,*	129711	SNV	AC=498,53,1,9,452;AF=0.117,0.0124,0.000234,0.00211,0.106;AN=4270;BaseQRankSum=-0.674;ClippingRankSum=0.000;DP=30889;ExcessHet=4.6319;FS=0.000;InbreedingCoeff=0.1993;MLEAC=452,34,1,7,380;MLEAF=0.106,0.00796,0.000234,0.00164,0.089;MQ=30.92;MQRankSum=0.091;QD=12.98;ReadPosRankSum=0.464;SOR=0.161
chr21	8402107	13072	3'ETS	GT	G,TT,*	19959.6	SNV	AC=186,1,7;AF=0.0505,0.000271,0.0019;AN=3684;BaseQRankSum=-0.000;ClippingRankSum=0.000;DP=38029;ExcessHet=0.0000;FS=0.000;InbreedingCoeff=0.2335;MLEAC=173,1,6;MLEAF=0.047,0.000271,0.00163;MQ=22.45;MQRankSum=0.763;QD=9.47;ReadPosRankSum=-0.000;SOR=0.098
chr21	8402108	13073	3'ETS	T	G,A,C,*	817216	SNV	AC=3392,2,1,81;AF=0.827,0.000487,0.000244,0.0197;AN=4104;BaseQRankSum=-0.000;ClippingRankSum=0.000;DP=29144;ExcessHet=16.8226;FS=0.000;InbreedingCoeff=0.0379;MLEAC=3303,2,1,50;MLEAF=0.805,0.000487,0.000244,0.0122;MQ=35.10;MQRankSum=0.419;QD=30.09;ReadPosRankSum=0.319;SOR=4.251
chr21	8402109	13074	3'ETS	G	T,*	858.09	SNV	AC=5,2;AF=0.0011,0.000441;AN=4536;BaseQRankSum=-0.566;ClippingRankSum=0.000;DP=40476;ExcessHet=3.0216;FS=0.000;InbreedingCoeff=0.0341;MLEAC=5,2;MLEAF=0.0011,0.000441;MQ=18.31;MQRankSum=0.362;QD=9.03;ReadPosRankSum=0.328;SOR=0.090
chr21	8402110	13075	3'ETS	G	T,*	736.97	SNV	AC=2,3;AF=0.000425,0.000638;AN=4704;BaseQRankSum=0.452;ClippingRankSum=0.000;DP=40742;ExcessHet=3.0165;FS=0.000;InbreedingCoeff=0.0273;MLEAC=1,3;MLEAF=0.000213,0.000638;MQ=27.29;MQRankSum=0.736;QD=8.57;ReadPosRankSum=0.075;SOR=0.119
chr21	8402113	13078	3'ETS	G	T,A	1004.65	SNV	AC=7,1;AF=0.00148,0.000211;AN=4734;BaseQRankSum=-0.476;ClippingRankSum=-0.000;DP=41997;ExcessHet=0.0147;FS=0.000;InbreedingCoeff=0.0406;MLEAC=6,1;MLEAF=0.00127,0.000211;MQ=32.18;MQRankSum=1.221;QD=8.30;ReadPosRankSum=0.175;SOR=0.046
chr21	8402115	13080	3'ETS	G	T,A,GC	6488.3	SNV	AC=24,14,2;AF=0.00507,0.00296,0.000423;AN=4730;BaseQRankSum=0.000;ClippingRankSum=0.000;DP=42726;ExcessHet=0.0330;FS=0.000;InbreedingCoeff=0.0793;MLEAC=21,12,2;MLEAF=0.00444,0.00254,0.000423;MQ=34.41;MQRankSum=0.815;QD=8.56;ReadPosRankSum=0.000;SOR=0.143
chr21	8402126	13091	3'ETS	A	T	193.47	SNV	AC=4;AF=0.000834;AN=4794;BaseQRankSum=-2.134;ClippingRankSum=0.000;DP=54578;ExcessHet=58.8362;FS=0.000;InbreedingCoeff=-0.0766;MLEAC=2;MLEAF=0.000417;MQ=36.23;MQRankSum=0.046;QD=3.28;ReadPosRankSum=1.040;SOR=0.003
chr21	8402131	13096	3'ETS	G	C	2077.15	SNV	AC=6;AF=0.00125;AN=4818;BaseQRankSum=0.815;ClippingRankSum=0.000;DP=56836;ExcessHet=11.2751;FS=0.000;InbreedingCoeff=-0.0377;MLEAC=6;MLEAF=0.00125;MQ=35.98;MQRankSum=0.820;QD=10.33;ReadPosRankSum=0.902;SOR=0.077
chr21	8402152	13117	3'ETS	C	A	8343.23	SNV	AC=37;AF=0.00751;AN=4930;BaseQRankSum=-0.000;ClippingRankSum=0.000;DP=82761;ExcessHet=0.8122;FS=0.000;InbreedingCoeff=0.0028;MLEAC=37;MLEAF=0.00751;MQ=37.67;MQRankSum=0.955;QD=6.26;ReadPosRankSum=-0.339;SOR=0.110
chr21	8219118	13130	3'ETS	C	T	2886.28	SNV	AC=3;AF=0.00123;AN=2442;BaseQRankSum=-0.410;ClippingRankSum=0.000;DP=2581;ExcessHet=0.0027;FS=0.000;InbreedingCoeff=-0.1283;MLEAC=4;MLEAF=0.00164;MQ=39.04;MQRankSum=2.670;QD=26.48;ReadPosRankSum=-0.394;SOR=3.737
chr21	8402168	13133	3'ETS	C	T	3155.94	SNV	AC=17;AF=0.00343;AN=4960;BaseQRankSum=0.000;ClippingRankSum=0.000;DP=93532;ExcessHet=3.2528;FS=0.000;InbreedingCoeff=-0.0069;MLEAC=17;MLEAF=0.00343;MQ=37.19;MQRankSum=0.720;QD=4.06;ReadPosRankSum=0.045;SOR=0.081
chr21	8402170	13135	3'ETS	C	T	1207.49	SNV	AC=9;AF=0.00181;AN=4962;BaseQRankSum=-0.000;ClippingRankSum=0.000;DP=94217;ExcessHet=3.0902;FS=0.000;InbreedingCoeff=-0.0062;MLEAC=8;MLEAF=0.00161;MQ=36.75;MQRankSum=0.265;QD=2.91;ReadPosRankSum=0.202;SOR=0.035
chr21	8402171	13136	3'ETS	G	T,C	1299.49	SNV	AC=3,1;AF=0.000605,0.000202;AN=4958;BaseQRankSum=1.324;ClippingRankSum=0.000;DP=94264;ExcessHet=3.0157;FS=0.000;InbreedingCoeff=0.0047;MLEAC=3,1;MLEAF=0.000605,0.000202;MQ=37.11;MQRankSum=-0.405;QD=6.77;ReadPosRankSum=0.520;SOR=0.199
chr21	8402180	13145	3'ETS	C	CG	1850.68	SNV	AC=3;AF=0.000605;AN=4960;BaseQRankSum=0.791;ClippingRankSum=0.000;DP=101538;ExcessHet=0.0013;FS=0.000;InbreedingCoeff=0.0906;MLEAC=3;MLEAF=0.000605;MQ=38.64;MQRankSum=1.910;QD=8.26;ReadPosRankSum=0.377;SOR=0.272
chr21	8402182	13147	3'ETS	G	T	851.32	SNV	AC=7;AF=0.00141;AN=4964;BaseQRankSum=0.000;ClippingRankSum=0.000;DP=102260;ExcessHet=3.1444;FS=0.000;InbreedingCoeff=-0.0036;MLEAC=7;MLEAF=0.00141;MQ=36.94;MQRankSum=0.359;QD=1.85;ReadPosRankSum=0.266;SOR=0.026
chr21	8402188	13153	3'ETS	C	A	8669.15	SNV	AC=15;AF=0.00302;AN=4966;BaseQRankSum=0.116;ClippingRankSum=0.000;DP=104330;ExcessHet=3.1605;FS=0.000;InbreedingCoeff=-0.0054;MLEAC=14;MLEAF=0.00282;MQ=37.18;MQRankSum=1.382;QD=7.49;ReadPosRankSum=-0.411;SOR=0.221
chr21	8402191	13156	3'ETS	GTCCGC	G	3448.01	INDEL	AC=5;AF=0.00101;AN=4962;BaseQRankSum=-0.000;ClippingRankSum=0.000;DP=105692;ExcessHet=3.1022;FS=0.000;InbreedingCoeff=-0.0053;MLEAC=5;MLEAF=0.00101;MQ=36.75;MQRankSum=0.735;QD=9.99;ReadPosRankSum=0.775;SOR=0.177
chr21	8402195	13160	3'ETS	G	A,*	3630.14	SNV	AC=1,5;AF=0.000201,0.00101;AN=4972;BaseQRankSum=0.739;ClippingRankSum=0.000;DP=106941;ExcessHet=3.0235;FS=0.000;InbreedingCoeff=0.0024;MLEAC=1,5;MLEAF=0.000201,0.00101;MQ=17.39;MQRankSum=1.327;QD=9.95;ReadPosRankSum=-0.279;SOR=0.134
chr21	8402197	13162	3'ETS	TCCGGG	TCCGGGCCGGG,T	86325.4	INDEL	AC=70,2;AF=0.0141,0.000403;AN=4968;BaseQRankSum=0.243;ClippingRankSum=0.000;DP=112050;ExcessHet=5.3208;FS=0.000;InbreedingCoeff=-0.0100;MLEAC=70,2;MLEAF=0.0141,0.000403;MQ=36.96;MQRankSum=0.131;QD=11.70;ReadPosRankSum=-0.031;SOR=0.193
chr21	8402202	13167	3'ETS	G	C,*	2565.15	SNV	AC=3,2;AF=0.000602,0.000401;AN=4982;BaseQRankSum=0.751;ClippingRankSum=0.000;DP=113445;ExcessHet=3.0191;FS=0.000;InbreedingCoeff=0.0022;MLEAC=3,2;MLEAF=0.000602,0.000401;MQ=30.56;MQRankSum=0.985;QD=5.98;ReadPosRankSum=0.183;SOR=0.130
chr21	8402208	13173	3'ETS	A	C,G	7227.79	SNV	AC=13,2;AF=0.00261,0.000401;AN=4982;BaseQRankSum=-1.335;ClippingRankSum=0.000;DP=118261;ExcessHet=0.0475;FS=0.000;InbreedingCoeff=0.0326;MLEAC=7,2;MLEAF=0.00141,0.000401;MQ=36.60;MQRankSum=0.674;QD=4.80;ReadPosRankSum=0.787;SOR=0.043
chr21	8402223	13188	3'ETS	C	T	279.69	SNV	AC=4;AF=0.000801;AN=4994;BaseQRankSum=0.497;ClippingRankSum=0.000;DP=121867;ExcessHet=3.0233;FS=0.000;InbreedingCoeff=-0.0026;MLEAC=4;MLEAF=0.000801;MQ=37.25;MQRankSum=1.138;QD=1.16;ReadPosRankSum=0.275;SOR=0.028
chr21	8402227	13192	3'ETS	G	C	3872.55	SNV	AC=6;AF=0.0012;AN=4994;BaseQRankSum=-1.900;ClippingRankSum=0.000;DP=126730;ExcessHet=3.0234;FS=0.000;InbreedingCoeff=-0.0031;MLEAC=6;MLEAF=0.0012;MQ=36.74;MQRankSum=0.618;QD=3.64;ReadPosRankSum=0.090;SOR=0.070
chr21	8402229	13194	3'ETS	T	G	9484.63	SNV	AC=25;AF=0.00501;AN=4994;BaseQRankSum=-0.524;ClippingRankSum=0.000;DP=130476;ExcessHet=0.4282;FS=0.000;InbreedingCoeff=0.0235;MLEAC=23;MLEAF=0.00461;MQ=36.83;MQRankSum=0.170;QD=4.87;ReadPosRankSum=0.394;SOR=0.055
chr21	8402231	13196	3'ETS	G	GT	3520.08	SNV	AC=8;AF=0.0016;AN=4994;BaseQRankSum=0.000;ClippingRankSum=0.000;DP=130557;ExcessHet=3.0347;FS=0.000;InbreedingCoeff=-0.0033;MLEAC=8;MLEAF=0.0016;MQ=37.40;MQRankSum=1.322;QD=8.71;ReadPosRankSum=0.299;SOR=0.161
chr21	8402236	13201	3'ETS	C	T	63440.9	SNV	AC=61;AF=0.0122;AN=4996;BaseQRankSum=-1.004;ClippingRankSum=0.000;DP=135415;ExcessHet=0.8645;FS=0.000;InbreedingCoeff=0.0133;MLEAC=61;MLEAF=0.0122;MQ=36.50;MQRankSum=-0.554;QD=7.84;ReadPosRankSum=0.008;SOR=0.214
chr21	8402239	13204	3'ETS	C	T	3477.83	SNV	AC=5;AF=0.001;AN=4996;BaseQRankSum=-1.898;ClippingRankSum=0.000;DP=135751;ExcessHet=3.0233;FS=0.000;InbreedingCoeff=-0.0022;MLEAC=5;MLEAF=0.001;MQ=36.06;MQRankSum=1.801;QD=4.96;ReadPosRankSum=-0.204;SOR=0.093
chr21	8402240	13205	3'ETS	G	C	211962	SNV	AC=149;AF=0.0298;AN=4994;BaseQRankSum=0.933;ClippingRankSum=0.000;DP=148740;ExcessHet=0.0316;FS=0.000;InbreedingCoeff=0.0585;MLEAC=148;MLEAF=0.0296;MQ=36.44;MQRankSum=0.526;QD=11.08;ReadPosRankSum=0.000;SOR=0.396
chr21	8402245	13210	3'ETS	CGGCCGCGCCGAGCCGGGCCCGTGGCCCGCCGGTCCCCGTCCCGGGGGTT	GGGCCGCGCCGAGCCGGGCCCGTGGCCCGCCGGTCCCCGTCCCGGGGGTT,C	12863.8	SNV	AC=40,1;AF=0.00801,0.0002;AN=4996;BaseQRankSum=0.000;ClippingRankSum=0.000;DP=145118;ExcessHet=3.7339;FS=0.000;InbreedingCoeff=-0.0064;MLEAC=40,1;MLEAF=0.00801,0.0002;MQ=36.34;MQRankSum=1.249;QD=3.91;ReadPosRankSum=0.349;SOR=0.063
chr21	8219199	13211	3'ETS	G	C	231.69	SNV	AC=9;AF=0.00189;AN=4760;BaseQRankSum=0.385;ClippingRankSum=-0.000;DP=16036;ExcessHet=0.0625;FS=0.000;InbreedingCoeff=-0.0388;MLEAC=8;MLEAF=0.00168;MQ=36.45;MQRankSum=0.524;QD=4.21;ReadPosRankSum=0.385;SOR=0.223
chr21	8402246	13211	3'ETS	GGCCGC	G,GGCCGCGCCGC,*	6559.32	INDEL	AC=8,1,1;AF=0.0016,0.0002,0.0002;AN=4996;BaseQRankSum=0.648;ClippingRankSum=0.000;DP=145091;ExcessHet=3.0497;FS=0.000;InbreedingCoeff=0.0026;MLEAC=7,1,1;MLEAF=0.0014,0.0002,0.0002;MQ=35.90;MQRankSum=0.815;QD=6.42;ReadPosRankSum=-0.170;SOR=0.067
chr21	8402251	13216	3'ETS	C	CGCCGA,T,*	8229.43	SNV	AC=5,3,8;AF=0.001,0.000601,0.0016;AN=4994;BaseQRankSum=0.000;ClippingRankSum=0.000;DP=145999;ExcessHet=3.1155;FS=0.000;InbreedingCoeff=0.0089;MLEAC=5,2,7;MLEAF=0.001,0.0004,0.0014;MQ=19.16;MQRankSum=-0.247;QD=6.10;ReadPosRankSum=-0.157;SOR=0.061
chr21	8219210	13222	3'ETS	CGCCGA	C,CGCCGAGCCGA,*	622.96	INDEL	AC=3,3,2;AF=0.000616,0.000616,0.000411;AN=4872;BaseQRankSum=-0.000;ClippingRankSum=-0.000;DP=20389;ExcessHet=3.0373;FS=0.000;InbreedingCoeff=0.0655;MLEAC=3,3,2;MLEAF=0.000616,0.000616,0.000411;MQ=29.44;MQRankSum=-0.431;QD=8.53;ReadPosRankSum=1.383;SOR=0.223
chr21	8402265	13230	3'ETS	C	T,G,*	896.73	SNV	AC=1,1,1;AF=0.0002,0.0002,0.0002;AN=4996;BaseQRankSum=-1.071;ClippingRankSum=0.000;DP=146939;ExcessHet=3.0129;FS=0.000;InbreedingCoeff=0.0027;MLEAC=1,1,1;MLEAF=0.0002,0.0002,0.0002;MQ=31.57;MQRankSum=0.461;QD=5.43;ReadPosRankSum=-1.089;SOR=0.087
chr21	8219219	13231	3'ETS	G	GGGCCCGT	4032.55	INDEL	AC=12;AF=0.00245;AN=4896;BaseQRankSum=-0.000;ClippingRankSum=-0.000;DP=23291;ExcessHet=3.1640;FS=0.000;InbreedingCoeff=-0.0321;MLEAC=13;MLEAF=0.00266;MQ=34.34;MQRankSum=-0.552;QD=16.33;ReadPosRankSum=0.108;SOR=0.393
chr21	8402267	13232	3'ETS	T	G,*	5948.28	SNV	AC=4,1;AF=0.000801,0.0002;AN=4994;BaseQRankSum=-2.135;ClippingRankSum=-0.000;DP=147837;ExcessHet=0.0044;FS=0.000;InbreedingCoeff=0.1146;MLEAC=3,1;MLEAF=0.000601,0.0002;MQ=34.67;MQRankSum=-0.207;QD=11.85;ReadPosRankSum=0.594;SOR=0.128
chr21	8402268	13233	3'ETS	G	A,*	9837.36	SNV	AC=6,1;AF=0.0012,0.0002;AN=4996;BaseQRankSum=-2.451;ClippingRankSum=0.000;DP=149206;ExcessHet=3.0286;FS=0.000;InbreedingCoeff=0.0001;MLEAC=6,1;MLEAF=0.0012,0.0002;MQ=36.58;MQRankSum=1.023;QD=5.18;ReadPosRankSum=0.561;SOR=0.113
chr21	8402273	13238	3'ETS	G	A,C,*	5997.55	SNV	AC=1,1,1;AF=0.0002,0.0002,0.0002;AN=4994;BaseQRankSum=2.956;ClippingRankSum=0.000;DP=151484;ExcessHet=3.0130;FS=0.000;InbreedingCoeff=0.0114;MLEAC=1,1,1;MLEAF=0.0002,0.0002,0.0002;MQ=35.58;MQRankSum=0.639;QD=8.60;ReadPosRankSum=0.276;SOR=0.244
chr21	8402274	13239	3'ETS	CCGGTCCCCGTCCCGGGGGTTGGCCGCG	C,TCGGTCCCCGTCCCGGGGGTTGGCCGCG,*	766.71	INDEL	AC=1,1,1;AF=0.0002,0.0002,0.0002;AN=4996;BaseQRankSum=0.573;ClippingRankSum=0.000;DP=151854;ExcessHet=3.0129;FS=0.000;InbreedingCoeff=0.0027;MLEAC=1,1,1;MLEAF=0.0002,0.0002,0.0002;MQ=27.55;MQRankSum=2.324;QD=5.11;ReadPosRankSum=2.016;SOR=0.056
chr21	8402275	13240	3'ETS	C	T,*	1595.76	SNV	AC=3,2;AF=0.0006,0.0004;AN=4996;BaseQRankSum=-3.447;ClippingRankSum=0.000;DP=152061;ExcessHet=3.0190;FS=0.000;InbreedingCoeff=0.0004;MLEAC=3,2;MLEAF=0.0006,0.0004;MQ=31.96;MQRankSum=-0.165;QD=2.96;ReadPosRankSum=-1.171;SOR=0.042
chr21	8402279	13244	3'ETS	CCCCGTCCCGGGGGTT	ACCCGTCCCGGGGGTT,C,*	2839.29	INDEL	AC=1,1,2;AF=0.0002,0.0002,0.000401;AN=4992;BaseQRankSum=-1.069;ClippingRankSum=0.000;DP=152137;ExcessHet=3.0156;FS=0.000;InbreedingCoeff=0.0068;MLEAC=1,1,2;MLEAF=0.0002,0.0002,0.000401;MQ=30.40;MQRankSum=1.486;QD=7.49;ReadPosRankSum=-0.343;SOR=0.096
chr21	8402280	13245	3'ETS	C	A,*	4127.63	SNV	AC=3,3;AF=0.000601,0.000601;AN=4992;BaseQRankSum=-1.111;ClippingRankSum=-0.000;DP=152458;ExcessHet=3.0234;FS=0.000;InbreedingCoeff=0.0001;MLEAC=3,3;MLEAF=0.000601,0.000601;MQ=29.48;MQRankSum=1.394;QD=4.99;ReadPosRankSum=-0.404;SOR=0.099
chr21	8402281	13246	3'ETS	C	A,*	6736.51	SNV	AC=8,3;AF=0.0016,0.000601;AN=4992;BaseQRankSum=-0.451;ClippingRankSum=0.000;DP=153382;ExcessHet=3.0584;FS=0.000;InbreedingCoeff=-0.0008;MLEAC=8,3;MLEAF=0.0016,0.000601;MQ=32.56;MQRankSum=-0.427;QD=4.37;ReadPosRankSum=0.113;SOR=0.082
chr21	8402282	13247	3'ETS	C	T,*	1690.73	SNV	AC=1,3;AF=0.0002,0.000601;AN=4992;BaseQRankSum=0.000;ClippingRankSum=0.000;DP=152972;ExcessHet=3.0155;FS=0.000;InbreedingCoeff=0.0006;MLEAC=1,3;MLEAF=0.0002,0.000601;MQ=28.77;MQRankSum=0.591;QD=2.92;ReadPosRankSum=-0.874;SOR=0.027
chr21	8402283	13248	3'ETS	G	C,*	4214.32	SNV	AC=6,3;AF=0.0012,0.000601;AN=4988;BaseQRankSum=0.799;ClippingRankSum=0.000;DP=156789;ExcessHet=3.0432;FS=0.000;InbreedingCoeff=0.0081;MLEAC=5,3;MLEAF=0.001,0.000601;MQ=31.32;MQRankSum=0.037;QD=4.62;ReadPosRankSum=-0.263;SOR=0.054
chr21	8402284	13249	3'ETS	T	G,TC,*	4860.72	SNV	AC=1,1,3;AF=0.0002,0.0002,0.000601;AN=4988;BaseQRankSum=-2.303;ClippingRankSum=0.000;DP=159085;ExcessHet=3.0192;FS=0.000;InbreedingCoeff=0.0105;MLEAC=1,1,3;MLEAF=0.0002,0.0002,0.000601;MQ=30.42;MQRankSum=0.000;QD=8.45;ReadPosRankSum=-0.524;SOR=0.087
chr21	8402287	13252	3'ETS	C	CG,A,*	122408	SNV	AC=138,1,2;AF=0.0277,0.0002,0.000401;AN=4990;BaseQRankSum=0.000;ClippingRankSum=0.000;DP=166183;ExcessHet=0.1349;FS=0.000;InbreedingCoeff=0.0404;MLEAC=137,1,2;MLEAF=0.0275,0.0002,0.000401;MQ=34.97;MQRankSum=-0.611;QD=8.85;ReadPosRankSum=0.019;SOR=0.837
chr21	8402290	13255	3'ETS	G	A,*	6460.02	SNV	AC=7,3;AF=0.0014,0.000601;AN=4994;BaseQRankSum=-0.991;ClippingRankSum=0.000;DP=163202;ExcessHet=3.0496;FS=0.000;InbreedingCoeff=-0.0009;MLEAC=7,3;MLEAF=0.0014,0.000601;MQ=30.01;MQRankSum=0.688;QD=7.64;ReadPosRankSum=0.198;SOR=0.176
chr21	8219246	13258	3'ETS	C	CG,T	2174.37	SNV	AC=42,3;AF=0.00841,0.000601;AN=4994;BaseQRankSum=-0.000;ClippingRankSum=-0.000;DP=38864;ExcessHet=3.9179;FS=0.000;InbreedingCoeff=0.0030;MLEAC=41,3;MLEAF=0.00821,0.000601;MQ=35.63;MQRankSum=0.253;QD=3.14;ReadPosRankSum=0.373;SOR=0.066
chr21	8219249	13261	3'ETS	G	A	388.85	SNV	AC=12;AF=0.0024;AN=5000;BaseQRankSum=0.000;ClippingRankSum=-0.000;DP=39941;ExcessHet=3.5891;FS=0.000;InbreedingCoeff=-0.0135;MLEAC=11;MLEAF=0.0022;MQ=34.38;MQRankSum=-0.601;QD=1.92;ReadPosRankSum=-0.000;SOR=0.067
chr21	8402298	13263	3'ETS	C	T,*	692.76	SNV	AC=3,1;AF=0.000601,0.0002;AN=4994;BaseQRankSum=-1.447;ClippingRankSum=0.000;DP=179427;ExcessHet=3.0155;FS=0.000;InbreedingCoeff=0.0006;MLEAC=3,1;MLEAF=0.000601,0.0002;MQ=32.63;MQRankSum=-1.892;QD=2.14;ReadPosRankSum=0.460;SOR=0.034
chr21	8402299	13264	3'ETS	G	T,*	10481	SNV	AC=2,1;AF=0.0004,0.0002;AN=4994;BaseQRankSum=2.411;ClippingRankSum=0.000;DP=176393;ExcessHet=3.0130;FS=0.000;InbreedingCoeff=0.0055;MLEAC=2,1;MLEAF=0.0004,0.0002;MQ=33.68;MQRankSum=1.307;QD=15.06;ReadPosRankSum=0.322;SOR=0.960
chr21	8402300	13265	3'ETS	C	T,*	1837.8	SNV	AC=3,1;AF=0.000601,0.0002;AN=4992;BaseQRankSum=0.000;ClippingRankSum=0.000;DP=177257;ExcessHet=3.0155;FS=0.000;InbreedingCoeff=0.0007;MLEAC=3,1;MLEAF=0.000601,0.0002;MQ=32.13;MQRankSum=0.000;QD=7.07;ReadPosRankSum=0.497;SOR=0.107
chr21	8402302	13267	3'ETS	C	T,G	149.59	SNV	AC=3,1;AF=0.000601,0.0002;AN=4992;BaseQRankSum=0.000;ClippingRankSum=0.000;DP=176839;ExcessHet=3.0155;FS=0.000;InbreedingCoeff=0.0059;MLEAC=3,1;MLEAF=0.000601,0.0002;MQ=37.29;MQRankSum=0.953;QD=0.50;ReadPosRankSum=0.822;SOR=0.018
chr21	8219259	13271	3'ETS	C	T	105.57	SNV	AC=4;AF=0.0008;AN=5002;BaseQRankSum=0.366;ClippingRankSum=-0.000;DP=42840;ExcessHet=3.1149;FS=0.000;InbreedingCoeff=-0.0101;MLEAC=3;MLEAF=0.0006;MQ=32.62;MQRankSum=0.566;QD=1.45;ReadPosRankSum=-0.171;SOR=0.034
chr21	8402312	13277	3'ETS	T	G	172.11	SNV	AC=4;AF=0.000803;AN=4982;BaseQRankSum=-2.102;ClippingRankSum=0.000;DP=210982;ExcessHet=165.9713;FS=0.000;InbreedingCoeff=-0.0790;MLEAC=1;MLEAF=0.000201;MQ=35.87;MQRankSum=0.107;QD=0.97;ReadPosRankSum=-0.519;SOR=0.053
chr21	8219271	13283	3'ETS	T	G	45.3	SNV	AC=14;AF=0.00281;AN=4990;BaseQRankSum=-1.354;ClippingRankSum=-0.000;DP=52266;ExcessHet=90.5483;FS=0.000;InbreedingCoeff=-0.0772;MLEAC=6;MLEAF=0.0012;MQ=35.67;MQRankSum=0.405;QD=0.24;ReadPosRankSum=0.712;SOR=0.009
chr21	8402322	13287	3'ETS	A	C,G	232.57	SNV	AC=7,1;AF=0.00141,0.000201;AN=4978;BaseQRankSum=-2.004;ClippingRankSum=0.000;DP=210304;ExcessHet=3.0489;FS=0.000;InbreedingCoeff=0.0562;MLEAC=4,1;MLEAF=0.000804,0.000201;MQ=35.68;MQRankSum=0.042;QD=0.71;ReadPosRankSum=-0.244;SOR=0.062
chr21	8402326	13291	3'ETS	G	T	3481.66	SNV	AC=3;AF=0.000602;AN=4980;BaseQRankSum=0.291;ClippingRankSum=0.000;DP=184752;ExcessHet=104.8747;FS=0.000;InbreedingCoeff=-0.0614;MLEAC=3;MLEAF=0.000602;MQ=36.04;MQRankSum=1.340;QD=10.91;ReadPosRankSum=-0.268;SOR=0.313
chr21	8219283	13295	3'ETS	C	A	302.55	SNV	AC=3;AF=0.000599;AN=5006;BaseQRankSum=0.000;ClippingRankSum=0.000;DP=62261;ExcessHet=3.0155;FS=0.000;InbreedingCoeff=-0.0025;MLEAC=3;MLEAF=0.000599;MQ=37.64;MQRankSum=0.987;QD=2.94;ReadPosRankSum=-0.735;SOR=0.068
chr21	8219286	13298	3'ETS	G	C	231.82	SNV	AC=5;AF=0.000999;AN=5006;BaseQRankSum=0.000;ClippingRankSum=0.000;DP=64784;ExcessHet=3.0580;FS=0.000;InbreedingCoeff=-0.0029;MLEAC=5;MLEAF=0.000999;MQ=36.21;MQRankSum=0.687;QD=2.03;ReadPosRankSum=0.875;SOR=0.046
chr21	8219288	13300	3'ETS	G	A,T	654.26	SNV	AC=8,1;AF=0.0016,0.0002;AN=5006;BaseQRankSum=-0.000;ClippingRankSum=0.000;DP=66532;ExcessHet=3.0417;FS=0.000;InbreedingCoeff=-0.0004;MLEAC=7,1;MLEAF=0.0014,0.0002;MQ=37.11;MQRankSum=0.305;QD=2.87;ReadPosRankSum=-1.253;SOR=0.078
chr21	8402349	13314	Terminator	T	C	4075.86	SNV	AC=7;AF=0.00141;AN=4976;BaseQRankSum=0.691;ClippingRankSum=0.000;DP=161128;ExcessHet=12.3288;FS=0.000;InbreedingCoeff=-0.0235;MLEAC=7;MLEAF=0.00141;MQ=27.60;MQRankSum=0.022;QD=8.75;ReadPosRankSum=0.108;SOR=0.239
chr21	8219304	13316	3'ETS	GTCCTTCC	CTCCTTCC,G	2196.56	SNV	AC=2,1;AF=0.000399,0.0002;AN=5008;BaseQRankSum=0.473;ClippingRankSum=0.000;DP=81263;ExcessHet=3.0129;FS=0.000;InbreedingCoeff=0.0002;MLEAC=2,1;MLEAF=0.000399,0.0002;MQ=37.79;MQRankSum=0.989;QD=9.89;ReadPosRankSum=1.498;SOR=0.318
chr21	8219316	13328	Terminator	C	G	322.86	SNV	AC=4;AF=0.000799;AN=5008;BaseQRankSum=0.000;ClippingRankSum=0.000;DP=93274;ExcessHet=3.0190;FS=0.000;InbreedingCoeff=-0.0011;MLEAC=3;MLEAF=0.000599;MQ=37.10;MQRankSum=0.525;QD=1.82;ReadPosRankSum=-0.302;SOR=0.038
chr21	8402373	13338	Terminator	T	G	2558.49	SNV	AC=14;AF=0.00282;AN=4960;BaseQRankSum=-3.204;ClippingRankSum=0.000;DP=148698;ExcessHet=235.2182;FS=0.000;InbreedingCoeff=-0.1037;MLEAC=21;MLEAF=0.00423;MQ=35.43;MQRankSum=-0.144;QD=1.87;ReadPosRankSum=0.417;SOR=0.017
chr21	8402379	13344	Terminator	A	C	2071.24	SNV	AC=14;AF=0.00285;AN=4908;BaseQRankSum=-2.292;ClippingRankSum=0.000;DP=129101;ExcessHet=201.3517;FS=0.000;InbreedingCoeff=-0.0994;MLEAC=18;MLEAF=0.00367;MQ=34.73;MQRankSum=-0.096;QD=1.89;ReadPosRankSum=0.053;SOR=0.014
chr21	8402382	13347	Terminator	A	C	1192.79	SNV	AC=5;AF=0.00102;AN=4908;BaseQRankSum=-2.745;ClippingRankSum=0.000;DP=125057;ExcessHet=125.2021;FS=0.000;InbreedingCoeff=-0.0801;MLEAC=5;MLEAF=0.00102;MQ=33.92;MQRankSum=-0.282;QD=3.16;ReadPosRankSum=-0.306;SOR=0.019
chr21	8402388	13353	Terminator	CGGGTGGT	CGGGTGGTGGGTGGT,C	1180.25	INDEL	AC=1,2;AF=0.000203,0.000406;AN=4928;BaseQRankSum=0.364;ClippingRankSum=0.000;DP=113690;ExcessHet=3.0130;FS=0.000;InbreedingCoeff=0.0091;MLEAC=1,1;MLEAF=0.000203,0.000203;MQ=34.94;MQRankSum=-0.037;QD=11.24;ReadPosRankSum=-0.816;SOR=0.042
chr21	8402389	13354	Terminator	G	A,*	5099.71	SNV	AC=20,2;AF=0.00415,0.000415;AN=4818;BaseQRankSum=-0.266;ClippingRankSum=0.000;DP=105350;ExcessHet=3.2623;FS=0.000;InbreedingCoeff=0.0296;MLEAC=20,1;MLEAF=0.00415,0.000208;MQ=23.40;MQRankSum=0.026;QD=7.10;ReadPosRankSum=0.653;SOR=0.094
chr21	8402391	13356	Terminator	G	C,*	984.56	SNV	AC=1,2;AF=0.000207,0.000415;AN=4824;BaseQRankSum=0.396;ClippingRankSum=0.000;DP=105218;ExcessHet=3.0132;FS=0.000;InbreedingCoeff=0.0184;MLEAC=1,1;MLEAF=0.000207,0.000207;MQ=27.66;MQRankSum=-0.665;QD=10.70;ReadPosRankSum=-1.810;SOR=0.012
chr21	8402392	13357	Terminator	T	G,A,C,*	7523.22	SNV	AC=23,1,2,4;AF=0.00486,0.000211,0.000423,0.000845;AN=4732;BaseQRankSum=-2.510;ClippingRankSum=0.000;DP=103011;ExcessHet=0.4479;FS=0.000;InbreedingCoeff=0.2663;MLEAC=23,1,2,3;MLEAF=0.00486,0.000211,0.000423,0.000634;MQ=30.08;MQRankSum=0.370;QD=7.41;ReadPosRankSum=0.155;SOR=0.026
chr21	8219347	13359	Terminator	CGGGTGGT	CGGGTGGTGGGTGGT,C	25832.4	INDEL	AC=38,3;AF=0.00759,0.000599;AN=5008;BaseQRankSum=0.000;ClippingRankSum=0.000;DP=109944;ExcessHet=3.7295;FS=0.000;InbreedingCoeff=-0.0075;MLEAC=37,2;MLEAF=0.00739,0.000399;MQ=37.69;MQRankSum=0.208;QD=7.70;ReadPosRankSum=0.089;SOR=0.058
chr21	8402395	13360	Terminator	T	C,*	1.03965e+06	SNV	AC=2364,4;AF=0.609,0.00103;AN=3880;BaseQRankSum=0.711;ClippingRankSum=0.000;DP=80026;ExcessHet=124.2092;FS=0.000;InbreedingCoeff=-0.0599;MLEAC=2432,3;MLEAF=0.627,0.000773;MQ=29.28;MQRankSum=0.100;QD=23.34;ReadPosRankSum=0.166;SOR=2.842
chr21	8219351	13363	Terminator	TGGTGGGC	T,TGGTGGGCGGTGGGC,CGGTGGGC,*	5630.69	INDEL	AC=23,5,1,3;AF=0.00459,0.000998,0.0002,0.000599;AN=5008;BaseQRankSum=0.413;ClippingRankSum=0.000;DP=113835;ExcessHet=3.4453;FS=0.000;InbreedingCoeff=-0.0033;MLEAC=19,5,1,2;MLEAF=0.00379,0.000998,0.0002,0.000399;MQ=35.27;MQRankSum=-2.072;QD=2.07;ReadPosRankSum=-0.063;SOR=0.010
chr21	8402399	13364	Terminator	C	T,*	923.46	SNV	AC=16,1;AF=0.00356,0.000223;AN=4494;BaseQRankSum=0.000;ClippingRankSum=0.000;DP=75846;ExcessHet=0.0000;FS=0.000;InbreedingCoeff=0.0674;MLEAC=12,1;MLEAF=0.00267,0.000223;MQ=19.36;MQRankSum=-1.834;QD=6.00;ReadPosRankSum=-0.967;SOR=0.064
chr21	8219354	13366	Terminator	TGGGCGGC	CGGGCGGC,T,TGGGCGGCGGGCGGC,*	160325	SNV	AC=561,18,1,15;AF=0.112,0.00359,0.0002,0.003;AN=5008;BaseQRankSum=0.519;ClippingRankSum=0.000;DP=156358;ExcessHet=182.3951;FS=0.000;InbreedingCoeff=-0.1246;MLEAC=549,17,1,13;MLEAF=0.11,0.00339,0.0002,0.0026;MQ=37.12;MQRankSum=-1.779;QD=3.27;ReadPosRankSum=-0.247;SOR=0.027
chr21	8219355	13367	Terminator	G	A,*	9332.46	SNV	AC=2,35;AF=0.000399,0.00699;AN=5008;BaseQRankSum=0.666;ClippingRankSum=0.000;DP=164466;ExcessHet=3.5942;FS=0.000;InbreedingCoeff=-0.0066;MLEAC=2,33;MLEAF=0.000399,0.00659;MQ=6.63;MQRankSum=1.903;QD=2.79;ReadPosRankSum=0.516;SOR=0.027
chr21	8402402	13367	Terminator	C	T,CGAGGCCCCACG,*	1830.53	SNV	AC=16,2,1;AF=0.0036,0.00045,0.000225;AN=4442;BaseQRankSum=0.000;ClippingRankSum=0.000;DP=67463;ExcessHet=0.0000;FS=0.000;InbreedingCoeff=0.1357;MLEAC=12,2,1;MLEAF=0.0027,0.00045,0.000225;MQ=26.84;MQRankSum=-1.480;QD=10.64;ReadPosRankSum=-0.976;SOR=0.091
chr21	8402403	13368	Terminator	G	GA	717.74	SNV	AC=3;AF=0.000792;AN=3786;BaseQRankSum=0.490;ClippingRankSum=-0.000;DP=57231;ExcessHet=10.9393;FS=0.000;InbreedingCoeff=-0.1054;MLEAC=3;MLEAF=0.000792;MQ=8.30;MQRankSum=-0.431;QD=16.31;ReadPosRankSum=-0.197;SOR=0.183
chr21	8219358	13370	Terminator	C	CA,*	9514.49	SNV	AC=2,40;AF=0.000399,0.00799;AN=5008;BaseQRankSum=0.000;ClippingRankSum=0.000;DP=164838;ExcessHet=3.7641;FS=0.000;InbreedingCoeff=-0.0081;MLEAC=2,37;MLEAF=0.000399,0.00739;MQ=6.59;MQRankSum=-2.654;QD=2.63;ReadPosRankSum=-2.327;SOR=0.024
chr21	8402405	13370	Terminator	G	GTGGT,GCCCCA	820.27	INDEL	AC=2,2;AF=0.00114,0.00114;AN=1760;BaseQRankSum=-0.000;ClippingRankSum=-0.000;DP=33845;ExcessHet=0.0343;FS=0.000;InbreedingCoeff=0.1037;MLEAC=1,2;MLEAF=0.000568,0.00114;MQ=1.86;MQRankSum=-0.913;QD=24.13;ReadPosRankSum=1.593;SOR=0.941
chr21	8402412	13377	Terminator	C	G	330284	SNV	AC=1774;AF=0.859;AN=2064;BaseQRankSum=-0.000;ClippingRankSum=-0.000;DP=13548;ExcessHet=0.0000;FS=0.000;InbreedingCoeff=0.1169;MLEAC=1846;MLEAF=0.894;MQ=27.22;MQRankSum=0.674;QD=49.33;ReadPosRankSum=0.967;SOR=11.284
chr21	8402416	13381	Terminator	CT	C	35303.3	SNV	AC=237;AF=0.108;AN=2190;BaseQRankSum=-0.000;ClippingRankSum=-0.000;DP=7969;ExcessHet=0.0000;FS=0.000;InbreedingCoeff=0.1479;MLEAC=341;MLEAF=0.156;MQ=24.24;MQRankSum=1.150;QD=45.20;ReadPosRankSum=1.150;SOR=5.815
chr21	8402419	13384	Terminator	T	A	23526.1	SNV	AC=292;AF=0.32;AN=912;BaseQRankSum=-0.431;ClippingRankSum=-0.000;DP=5099;ExcessHet=0.0000;FS=0.000;InbreedingCoeff=0.4338;MLEAC=398;MLEAF=0.436;MQ=12.65;MQRankSum=0.967;QD=50.49;ReadPosRankSum=-0.967;SOR=10.928
chr21	8219376	13388	Terminator	C	G	562.5	SNV	AC=5;AF=0.000998;AN=5008;BaseQRankSum=-2.602;ClippingRankSum=0.000;DP=168031;ExcessHet=3.0190;FS=0.000;InbreedingCoeff=-0.0010;MLEAC=5;MLEAF=0.000998;MQ=36.68;MQRankSum=-3.503;QD=1.23;ReadPosRankSum=-2.111;SOR=0.013
chr21	8446615	13393	Terminator	C	G	1876.91	SNV	AC=14;AF=0.00464;AN=3016;BaseQRankSum=-0.000;ClippingRankSum=0.000;DP=7682;ExcessHet=0.1872;FS=0.000;InbreedingCoeff=-0.0804;MLEAC=16;MLEAF=0.00531;MQ=22.16;MQRankSum=0.102;QD=12.27;ReadPosRankSum=0.530;SOR=1.003
chr21	8446617	13395	Terminator	C	CGGGTGGT	6131.49	INDEL	AC=51;AF=0.0165;AN=3086;BaseQRankSum=-0.000;ClippingRankSum=-0.000;DP=8110;ExcessHet=-0.0000;FS=0.000;InbreedingCoeff=0.0454;MLEAC=46;MLEAF=0.0149;MQ=21.32;MQRankSum=0.180;QD=45.76;ReadPosRankSum=-0.000;SOR=3.273
chr21	8219384	13396	Terminator	G	C,A	1804.45	SNV	AC=6,1;AF=0.0012,0.0002;AN=5008;BaseQRankSum=0.844;ClippingRankSum=0.000;DP=169060;ExcessHet=3.0285;FS=0.000;InbreedingCoeff=-0.0014;MLEAC=6,1;MLEAF=0.0012,0.0002;MQ=37.23;MQRankSum=1.496;QD=3.19;ReadPosRankSum=0.296;SOR=0.033
chr21	8219388	13400	Terminator	G	C,A	1.53506e+07	SNV	AC=4996,4;AF=0.998,0.000799;AN=5008;BaseQRankSum=5.386;ClippingRankSum=0.000;DP=416792;ExcessHet=3.0346;FS=0.000;InbreedingCoeff=-0.0016;MLEAC=4996,3;MLEAF=0.998,0.000599;MQ=37.42;MQRankSum=-0.561;QD=36.86;ReadPosRankSum=0.349;SOR=13.920
chr21	8446624	13402	Terminator	TGGGCGGC	CGGGCGGC,T	4223.5	SNV	AC=51,8;AF=0.0162,0.00254;AN=3148;BaseQRankSum=-0.000;ClippingRankSum=-0.000;DP=9076;ExcessHet=-0.0000;FS=0.000;InbreedingCoeff=0.1522;MLEAC=44,7;MLEAF=0.014,0.00222;MQ=26.69;MQRankSum=-0.000;QD=13.89;ReadPosRankSum=-0.000;SOR=1.014
chr21	8219391	13403	Terminator	C	T,G	606.13	SNV	AC=4,2;AF=0.000799,0.000399;AN=5008;BaseQRankSum=0.000;ClippingRankSum=0.000;DP=448158;ExcessHet=3.0233;FS=0.000;InbreedingCoeff=-0.0012;MLEAC=3,1;MLEAF=0.000599,0.0002;MQ=37.24;MQRankSum=-3.357;QD=0.82;ReadPosRankSum=-0.484;SOR=0.011
chr21	8219395	13407	Terminator	C	T	3020.3	SNV	AC=6;AF=0.0012;AN=5008;BaseQRankSum=-2.485;ClippingRankSum=0.000;DP=448525;ExcessHet=3.0233;FS=0.000;InbreedingCoeff=-0.0012;MLEAC=6;MLEAF=0.0012;MQ=37.67;MQRankSum=-0.045;QD=2.39;ReadPosRankSum=1.152;SOR=0.041
chr21	8219400	13412	Terminator	G	T	14239.5	SNV	AC=44;AF=0.00879;AN=5008;BaseQRankSum=0.768;ClippingRankSum=0.000;DP=451147;ExcessHet=3.9963;FS=0.000;InbreedingCoeff=-0.0093;MLEAC=42;MLEAF=0.00839;MQ=37.30;MQRankSum=-2.896;QD=2.01;ReadPosRankSum=-1.653;SOR=0.021
chr21	8219401	13413	Terminator	A	C,T,G,ACCG	1854.21	SNV	AC=4,1,1,1;AF=0.000799,0.0002,0.0002,0.0002;AN=5008;BaseQRankSum=0.839;ClippingRankSum=0.000;DP=452689;ExcessHet=3.0285;FS=0.000;InbreedingCoeff=-0.0014;MLEAC=3,1,1,1;MLEAF=0.000599,0.0002,0.0002,0.0002;MQ=37.82;MQRankSum=-0.101;QD=1.27;ReadPosRankSum=0.748;SOR=0.016
chr21	8219404	13416	Terminator	T	G	257988	SNV	AC=538;AF=0.107;AN=5008;BaseQRankSum=-0.404;ClippingRankSum=0.000;DP=491048;ExcessHet=153.6953;FS=0.000;InbreedingCoeff=-0.1235;MLEAC=537;MLEAF=0.107;MQ=37.46;MQRankSum=-3.231;QD=2.43;ReadPosRankSum=-2.824;SOR=0.031
chr21	8219412	13424	Terminator	T	C	3.80386e+06	SNV	AC=2242;AF=0.448;AN=5008;BaseQRankSum=1.057;ClippingRankSum=0.000;DP=674453;ExcessHet=2147483647.0000;FS=0.000;InbreedingCoeff=-0.8135;MLEAC=2246;MLEAF=0.448;MQ=37.99;MQRankSum=-5.040;QD=6.36;ReadPosRankSum=-3.371;SOR=0.112
chr21	8219420	13432	Terminator	C	T	11916.3	SNV	AC=16;AF=0.00319;AN=5008;BaseQRankSum=-1.120;ClippingRankSum=0.000;DP=721983;ExcessHet=3.1147;FS=0.000;InbreedingCoeff=-0.0032;MLEAC=16;MLEAF=0.00319;MQ=26.67;MQRankSum=-2.159;QD=2.82;ReadPosRankSum=-2.203;SOR=0.052
chr21	8446658	13436	Terminator	G	C,A	472237	SNV	AC=2931,12;AF=0.983,0.00402;AN=2982;BaseQRankSum=2.625;ClippingRankSum=0.000;DP=15318;ExcessHet=0.4670;FS=0.000;InbreedingCoeff=0.0319;MLEAC=2948,10;MLEAF=0.989,0.00335;MQ=31.23;MQRankSum=0.055;QD=31.93;ReadPosRankSum=-0.488;SOR=14.604
chr21	8219429	13441	Terminator	G	GC	2123.59	SNV	AC=4;AF=0.000799;AN=5008;BaseQRankSum=0.880;ClippingRankSum=0.000;DP=723243;ExcessHet=3.0493;FS=0.000;InbreedingCoeff=-0.0014;MLEAC=4;MLEAF=0.000799;MQ=17.88;MQRankSum=1.452;QD=1.36;ReadPosRankSum=2.679;SOR=0.065
chr21	8219430	13442	Terminator	GCCTCCGGGGTCGACCGCCTGCCGCCCGCGGGCGTGAGACTCAGCCGGCGTCTCGCCGTGTCCCGGGTCGACCGGCGGGCCTTCTCCACCGAGCGGCGTGTAGGAGTGCCCGTCGGGACGAACCGCAACCGGAGCGTCCCCGTCTCGGTCGGCA	ACCTCCGGGGTCGACCGCCTGCCGCCCGCGGGCGTGAGACTCAGCCGGCGTCTCGCCGTGTCCCGGGTCGACCGGCGGGCCTTCTCCACCGAGCGGCGTGTAGGAGTGCCCGTCGGGACGAACCGCAACCGGAGCGTCCCCGTCTCGGTCGGCA,G	15192.1	INDEL	AC=5,2;AF=0.000998,0.000399;AN=5008;BaseQRankSum=-2.071;ClippingRankSum=0.000;DP=726464;ExcessHet=3.0286;FS=0.000;InbreedingCoeff=-0.0009;MLEAC=5,2;MLEAF=0.000998,0.000399;MQ=27.85;MQRankSum=0.277;QD=2.49;ReadPosRankSum=0.738;SOR=0.060
chr21	8219433	13445	Terminator	T	C,*	15370.9	SNV	AC=2,2;AF=0.000399,0.000399;AN=5008;BaseQRankSum=2.384;ClippingRankSum=0.000;DP=726924;ExcessHet=3.0155;FS=0.000;InbreedingCoeff=-0.0008;MLEAC=2,2;MLEAF=0.000399,0.000399;MQ=10.79;MQRankSum=3.603;QD=3.24;ReadPosRankSum=2.494;SOR=0.078
chr21	8219436	13448	Terminator	GGGGTCGACCGCCTGCCGCCCGCGGGCGTGAGACTCAGCCGGCGTCTCGCCGTGTCCC	G,*	13646.5	INDEL	AC=3,2;AF=0.000599,0.000399;AN=5008;BaseQRankSum=-0.183;ClippingRankSum=0.000;DP=729334;ExcessHet=3.0190;FS=0.000;InbreedingCoeff=-0.0009;MLEAC=3,2;MLEAF=0.000599,0.000399;MQ=19.24;MQRankSum=0.197;QD=2.19;ReadPosRankSum=-5.950;SOR=0.049
chr21	8446670	13448	Terminator	G	T	252.62	SNV	AC=4;AF=0.000935;AN=4276;BaseQRankSum=0.157;ClippingRankSum=-0.000;DP=22887;ExcessHet=0.0281;FS=0.000;InbreedingCoeff=-0.0364;MLEAC=2;MLEAF=0.000468;MQ=22.63;MQRankSum=0.887;QD=25.26;ReadPosRankSum=0.489;SOR=0.914
chr21	8219437	13449	Terminator	G	GA,*	14616.3	SNV	AC=1,5;AF=0.0002,0.000998;AN=5008;BaseQRankSum=-2.986;ClippingRankSum=0.000;DP=729322;ExcessHet=3.0233;FS=0.000;InbreedingCoeff=-0.0012;MLEAC=1,5;MLEAF=0.0002,0.000998;MQ=7.43;MQRankSum=-0.985;QD=2.16;ReadPosRankSum=0.147;SOR=0.047
chr21	8219439	13451	Terminator	G	GC,*	14640.3	SNV	AC=1,5;AF=0.0002,0.000998;AN=5008;BaseQRankSum=-2.356;ClippingRankSum=0.000;DP=729611;ExcessHet=3.0233;FS=0.000;InbreedingCoeff=-0.0012;MLEAC=1,5;MLEAF=0.0002,0.000998;MQ=9.39;MQRankSum=1.613;QD=2.17;ReadPosRankSum=1.670;SOR=0.045
chr21	8219440	13452	Terminator	T	C,*	14639.3	SNV	AC=1,5;AF=0.0002,0.000998;AN=5008;BaseQRankSum=1.138;ClippingRankSum=0.000;DP=729758;ExcessHet=3.0233;FS=0.000;InbreedingCoeff=-0.0012;MLEAC=1,5;MLEAF=0.0002,0.000998;MQ=7.53;MQRankSum=-1.232;QD=2.16;ReadPosRankSum=-0.425;SOR=0.047
chr21	8219446	13458	Terminator	G	A,*	20039.1	SNV	AC=8,5;AF=0.0016,0.000998;AN=5008;BaseQRankSum=-0.578;ClippingRankSum=0.000;DP=741754;ExcessHet=3.0800;FS=0.000;InbreedingCoeff=0.0019;MLEAC=7,5;MLEAF=0.0014,0.000998;MQ=23.46;MQRankSum=0.269;QD=1.95;ReadPosRankSum=-0.287;SOR=0.022
chr21	8219447	13459	Terminator	C	G,*	19892	SNV	AC=7,5;AF=0.0014,0.000998;AN=5008;BaseQRankSum=0.488;ClippingRankSum=0.000;DP=742200;ExcessHet=3.0693;FS=0.000;InbreedingCoeff=0.0023;MLEAC=6,5;MLEAF=0.0012,0.000998;MQ=23.58;MQRankSum=0.413;QD=2.08;ReadPosRankSum=-0.498;SOR=0.022
chr21	8446682	13460	Terminator	T	C	57489.7	SNV	AC=691;AF=0.164;AN=4222;BaseQRankSum=-0.000;ClippingRankSum=0.000;DP=31157;ExcessHet=0.0000;FS=0.000;InbreedingCoeff=0.0428;MLEAC=760;MLEAF=0.18;MQ=31.73;MQRankSum=-0.236;QD=8.28;ReadPosRankSum=-1.160;SOR=0.134
chr21	8219452	13464	Terminator	C	G,*	14758.8	SNV	AC=2,5;AF=0.000399,0.000998;AN=5008;BaseQRankSum=-4.258;ClippingRankSum=0.000;DP=744208;ExcessHet=3.0285;FS=0.000;InbreedingCoeff=-0.0014;MLEAC=2,5;MLEAF=0.000399,0.000998;MQ=11.26;MQRankSum=0.979;QD=2.13;ReadPosRankSum=-3.025;SOR=0.030
chr21	8219453	13465	Terminator	G	C,*	16329.8	SNV	AC=2,5;AF=0.000399,0.000998;AN=5008;BaseQRankSum=2.964;ClippingRankSum=0.000;DP=745050;ExcessHet=3.0285;FS=0.000;InbreedingCoeff=-0.0013;MLEAC=2,5;MLEAF=0.000399,0.000998;MQ=14.95;MQRankSum=0.470;QD=2.17;ReadPosRankSum=0.861;SOR=0.030
chr21	8219455	13467	Terminator	C	G,*	59787.9	SNV	AC=23,5;AF=0.00459,0.000998;AN=5008;BaseQRankSum=-2.443;ClippingRankSum=0.000;DP=750224;ExcessHet=3.3399;FS=0.000;InbreedingCoeff=-0.0056;MLEAC=22,5;MLEAF=0.00439,0.000998;MQ=30.98;MQRankSum=2.515;QD=3.18;ReadPosRankSum=0.456;SOR=0.046
chr21	8219456	13468	Terminator	C	T,*	14840.3	SNV	AC=1,5;AF=0.0002,0.000998;AN=5008;BaseQRankSum=-1.671;ClippingRankSum=0.000;DP=751363;ExcessHet=3.0233;FS=0.000;InbreedingCoeff=-0.0011;MLEAC=1,5;MLEAF=0.0002,0.000998;MQ=8.66;MQRankSum=2.967;QD=2.24;ReadPosRankSum=0.878;SOR=0.031
chr21	8219458	13470	Terminator	C	T,*	20039.8	SNV	AC=2,5;AF=0.000399,0.000998;AN=5008;BaseQRankSum=-5.146;ClippingRankSum=0.000;DP=751983;ExcessHet=3.0285;FS=0.000;InbreedingCoeff=-0.0013;MLEAC=2,5;MLEAF=0.000399,0.000998;MQ=14.78;MQRankSum=2.672;QD=2.67;ReadPosRankSum=0.952;SOR=0.038
chr21	8219460	13472	Terminator	G	A,*	15141.9	SNV	AC=2,5;AF=0.000399,0.000998;AN=5008;BaseQRankSum=1.212;ClippingRankSum=0.000;DP=755035;ExcessHet=3.0288;FS=0.000;InbreedingCoeff=0.0013;MLEAC=2,5;MLEAF=0.000399,0.000998;MQ=15.23;MQRankSum=2.090;QD=2.00;ReadPosRankSum=-4.726;SOR=0.026
chr21	8446694	13472	Terminator	G	A	2074.77	SNV	AC=17;AF=0.00357;AN=4758;BaseQRankSum=0.561;ClippingRankSum=-0.000;DP=37682;ExcessHet=0.0077;FS=0.000;InbreedingCoeff=-0.0083;MLEAC=16;MLEAF=0.00336;MQ=32.24;MQRankSum=0.674;QD=6.46;ReadPosRankSum=-0.385;SOR=0.100
chr21	8219461	13473	Terminator	G	GCTC,*	14891.8	SNV	AC=2,5;AF=0.000399,0.000998;AN=5008;BaseQRankSum=1.381;ClippingRankSum=0.000;DP=755236;ExcessHet=3.0285;FS=0.000;InbreedingCoeff=-0.0013;MLEAC=2,5;MLEAF=0.000399,0.000998;MQ=15.31;MQRankSum=2.070;QD=1.96;ReadPosRankSum=-4.652;SOR=0.026
chr21	8219463	13475	Terminator	GTGA	CTGA,G,*	138323	SNV	AC=75,2,5;AF=0.015,0.000399,0.000998;AN=5008;BaseQRankSum=1.371;ClippingRankSum=0.000;DP=780770;ExcessHet=5.9901;FS=0.000;InbreedingCoeff=-0.0102;MLEAC=72,2,5;MLEAF=0.0144,0.000399,0.000998;MQ=35.89;MQRankSum=2.091;QD=2.67;ReadPosRankSum=0.422;SOR=0.038
chr21	8219466	13478	Terminator	A	G,*	1.48121e+06	SNV	AC=811,7;AF=0.162,0.0014;AN=5008;BaseQRankSum=1.570;ClippingRankSum=0.000;DP=1068143;ExcessHet=364.1235;FS=0.000;InbreedingCoeff=-0.1931;MLEAC=816,7;MLEAF=0.163,0.0014;MQ=37.75;MQRankSum=-5.220;QD=3.22;ReadPosRankSum=-0.944;SOR=0.051
chr21	8219467	13479	Terminator	G	T,C,*	17224.8	SNV	AC=1,1,5;AF=0.0002,0.0002,0.000998;AN=5008;BaseQRankSum=-4.166;ClippingRankSum=0.000;DP=1092471;ExcessHet=3.0285;FS=0.000;InbreedingCoeff=-0.0014;MLEAC=1,1,5;MLEAF=0.0002,0.0002,0.000998;MQ=15.74;MQRankSum=3.323;QD=2.29;ReadPosRankSum=0.739;SOR=0.036
chr21	8219468	13480	Terminator	ACT	A,*	13940.3	INDEL	AC=1,5;AF=0.0002,0.000998;AN=5008;BaseQRankSum=1.014;ClippingRankSum=0.000;DP=1092802;ExcessHet=3.0233;FS=0.000;InbreedingCoeff=-0.0012;MLEAC=1,5;MLEAF=0.0002,0.000998;MQ=11.11;MQRankSum=0.405;QD=2.02;ReadPosRankSum=0.254;SOR=0.027
chr21	8219470	13482	Terminator	T	C,*	23560.4	SNV	AC=3,6;AF=0.000599,0.0012;AN=5008;BaseQRankSum=0.156;ClippingRankSum=0.000;DP=1093581;ExcessHet=3.0416;FS=0.000;InbreedingCoeff=-0.0018;MLEAC=3,6;MLEAF=0.000599,0.0012;MQ=16.35;MQRankSum=-8.840;QD=2.73;ReadPosRankSum=1.403;SOR=0.038
chr21	8219474	13486	Terminator	C	T,*	14224.3	SNV	AC=1,5;AF=0.0002,0.000998;AN=5008;BaseQRankSum=-4.109;ClippingRankSum=0.000;DP=1094158;ExcessHet=3.0233;FS=0.000;InbreedingCoeff=-0.0012;MLEAC=1,5;MLEAF=0.0002,0.000998;MQ=11.53;MQRankSum=-0.032;QD=2.05;ReadPosRankSum=2.132;SOR=0.029
chr21	8446709	13487	Terminator	G	A	242.66	SNV	AC=4;AF=0.000826;AN=4844;BaseQRankSum=-0.000;ClippingRankSum=-0.000;DP=44908;ExcessHet=3.0292;FS=0.000;InbreedingCoeff=-0.0166;MLEAC=3;MLEAF=0.000619;MQ=29.31;MQRankSum=-1.416;QD=2.96;ReadPosRankSum=-0.258;SOR=0.119
chr21	8446712	13490	Terminator	G	C	1071.9	SNV	AC=4;AF=0.000824;AN=4856;BaseQRankSum=0.000;ClippingRankSum=0.000;DP=46410;ExcessHet=3.0193;FS=0.000;InbreedingCoeff=-0.0143;MLEAC=4;MLEAF=0.000824;MQ=34.43;MQRankSum=0.690;QD=15.76;ReadPosRankSum=0.000;SOR=1.263
chr21	8219480	13492	Terminator	T	C,A,*	24288.6	SNV	AC=2,9,5;AF=0.000399,0.0018,0.000998;AN=5008;BaseQRankSum=0.136;ClippingRankSum=0.000;DP=1098190;ExcessHet=3.1149;FS=0.000;InbreedingCoeff=-0.0026;MLEAC=2,9,5;MLEAF=0.000399,0.0018,0.000998;MQ=27.53;MQRankSum=0.706;QD=1.97;ReadPosRankSum=-1.311;SOR=0.023
chr21	8219481	13493	Terminator	C	G,T,*	20723.4	SNV	AC=4,1,5;AF=0.000799,0.0002,0.000998;AN=5008;BaseQRankSum=-0.889;ClippingRankSum=0.000;DP=1100704;ExcessHet=3.0494;FS=0.000;InbreedingCoeff=-0.0020;MLEAC=4,1,5;MLEAF=0.000799,0.0002,0.000998;MQ=22.59;MQRankSum=-0.354;QD=2.09;ReadPosRankSum=0.064;SOR=0.030
chr21	8219482	13494	Terminator	TC	T,*	15633.7	INDEL	AC=2,5;AF=0.000399,0.000998;AN=5008;BaseQRankSum=-1.695;ClippingRankSum=0.000;DP=1100827;ExcessHet=3.0285;FS=0.000;InbreedingCoeff=-0.0014;MLEAC=2,5;MLEAF=0.000399,0.000998;MQ=16.20;MQRankSum=1.818;QD=2.16;ReadPosRankSum=-3.602;SOR=0.026
chr21	8402530	13495	Terminator	G	C	144.7	SNV	AC=9;AF=0.00193;AN=4652;BaseQRankSum=-0.000;ClippingRankSum=-0.000;DP=21623;ExcessHet=1.7612;FS=6.495;InbreedingCoeff=-0.0699;MLEAC=10;MLEAF=0.00215;MQ=7.45;MQRankSum=-0.000;QD=4.67;ReadPosRankSum=-0.253;SOR=0.093
chr21	8219484	13496	Terminator	GCCGTGTC	CCCGTGTC,G,*	23050.4	INDEL	AC=1,2,5;AF=0.0002,0.000399,0.000998;AN=5008;BaseQRankSum=0.860;ClippingRankSum=0.000;DP=1101934;ExcessHet=3.0347;FS=0.000;InbreedingCoeff=0.0001;MLEAC=1,2,5;MLEAF=0.0002,0.000399,0.000998;MQ=19.45;MQRankSum=1.091;QD=2.65;ReadPosRankSum=-0.515;SOR=0.031
chr21	8219485	13497	Terminator	C	CA,*	24682.7	SNV	AC=2,7;AF=0.000399,0.0014;AN=5008;BaseQRankSum=-0.667;ClippingRankSum=0.000;DP=1101948;ExcessHet=3.0417;FS=0.000;InbreedingCoeff=-0.0012;MLEAC=2,7;MLEAF=0.000399,0.0014;MQ=12.10;MQRankSum=2.770;QD=2.67;ReadPosRankSum=-3.425;SOR=0.030
chr21	8219487	13499	Terminator	G	T,*	25058.8	SNV	AC=6,7;AF=0.0012,0.0014;AN=5008;BaseQRankSum=-0.547;ClippingRankSum=0.000;DP=1102307;ExcessHet=3.0781;FS=0.000;InbreedingCoeff=-0.0026;MLEAC=6,7;MLEAF=0.0012,0.0014;MQ=21.81;MQRankSum=0.496;QD=2.14;ReadPosRankSum=-0.185;SOR=0.023
chr21	8402534	13499	Terminator	T	C	818.36	SNV	AC=15;AF=0.0193;AN=776;BaseQRankSum=-0.000;ClippingRankSum=-0.000;DP=35300;ExcessHet=1.8638;FS=198.560;InbreedingCoeff=-0.1940;MLEAC=36;MLEAF=0.0464;MQ=1.62;MQRankSum=2.100;QD=11.86;ReadPosRankSum=-2.100;SOR=7.167
chr21	8219489	13501	Terminator	G	C,*	23159.8	SNV	AC=1,7;AF=0.0002,0.0014;AN=5008;BaseQRankSum=-1.681;ClippingRankSum=0.000;DP=1103468;ExcessHet=3.0346;FS=0.000;InbreedingCoeff=-0.0015;MLEAC=1,7;MLEAF=0.0002,0.0014;MQ=6.89;MQRankSum=2.184;QD=2.70;ReadPosRankSum=-0.346;SOR=0.032
chr21	8219490	13502	Terminator	T	C,*	411035	SNV	AC=184,5;AF=0.0367,0.000998;AN=5008;BaseQRankSum=0.527;ClippingRankSum=0.000;DP=1187608;ExcessHet=19.0837;FS=0.000;InbreedingCoeff=-0.0387;MLEAC=184,5;MLEAF=0.0367,0.000998;MQ=37.97;MQRankSum=-1.638;QD=2.71;ReadPosRankSum=0.161;SOR=0.039
chr21	8446725	13503	Terminator	C	G	220.21	SNV	AC=4;AF=0.000814;AN=4914;BaseQRankSum=0.000;ClippingRankSum=0.000;DP=52280;ExcessHet=3.0289;FS=0.000;InbreedingCoeff=-0.0102;MLEAC=4;MLEAF=0.000814;MQ=32.38;MQRankSum=-0.347;QD=3.93;ReadPosRankSum=0.685;SOR=0.056
chr21	8219496	13508	Terminator	G	A,*	25374.9	SNV	AC=11,2;AF=0.0022,0.000399;AN=5008;BaseQRankSum=-0.635;ClippingRankSum=0.000;DP=1202608;ExcessHet=3.0781;FS=0.000;InbreedingCoeff=-0.0025;MLEAC=11,2;MLEAF=0.0022,0.000399;MQ=32.61;MQRankSum=2.103;QD=1.87;ReadPosRankSum=-0.660;SOR=0.030
chr21	8446733	13511	Terminator	G	C	51274.1	SNV	AC=195;AF=0.0397;AN=4906;BaseQRankSum=0.353;ClippingRankSum=0.000;DP=58165;ExcessHet=1.1261;FS=0.000;InbreedingCoeff=-0.0005;MLEAC=196;MLEAF=0.04;MQ=32.90;MQRankSum=-0.178;QD=8.36;ReadPosRankSum=0.447;SOR=0.245
chr21	8219500	13512	Terminator	A	G,*	14319.5	SNV	AC=2,2;AF=0.000399,0.000399;AN=5008;BaseQRankSum=0.702;ClippingRankSum=0.000;DP=1204392;ExcessHet=3.0155;FS=0.000;InbreedingCoeff=-0.0007;MLEAC=2,2;MLEAF=0.000399,0.000399;MQ=20.78;MQRankSum=0.954;QD=2.58;ReadPosRankSum=1.443;SOR=0.047
chr21	8219501	13513	Terminator	C	A,*	21051.4	SNV	AC=12,2;AF=0.0024,0.000399;AN=5008;BaseQRankSum=0.465;ClippingRankSum=0.000;DP=1208415;ExcessHet=3.0895;FS=0.000;InbreedingCoeff=-0.0027;MLEAC=12,2;MLEAF=0.0024,0.000399;MQ=32.37;MQRankSum=-5.715;QD=1.55;ReadPosRankSum=-1.748;SOR=0.027
chr21	8219502	13514	Terminator	C	T,*	13887.5	SNV	AC=3,2;AF=0.000599,0.000399;AN=5008;BaseQRankSum=-0.846;ClippingRankSum=0.000;DP=1210316;ExcessHet=3.0190;FS=0.000;InbreedingCoeff=-0.0009;MLEAC=3,2;MLEAF=0.000599,0.000399;MQ=24.67;MQRankSum=0.234;QD=2.27;ReadPosRankSum=0.268;SOR=0.035
chr21	8446736	13514	Terminator	A	G	5062.86	SNV	AC=48;AF=0.00974;AN=4928;BaseQRankSum=0.447;ClippingRankSum=0.000;DP=60224;ExcessHet=6.0542;FS=0.000;InbreedingCoeff=-0.0238;MLEAC=47;MLEAF=0.00954;MQ=32.93;MQRankSum=0.067;QD=5.38;ReadPosRankSum=-0.362;SOR=0.435
chr21	8446738	13516	Terminator	ACT	A	1043.04	INDEL	AC=7;AF=0.00142;AN=4936;BaseQRankSum=0.430;ClippingRankSum=-0.000;DP=60590;ExcessHet=3.0350;FS=0.000;InbreedingCoeff=-0.0098;MLEAC=7;MLEAF=0.00142;MQ=31.72;MQRankSum=1.264;QD=4.27;ReadPosRankSum=0.721;SOR=0.040
chr21	8219505	13517	Terminator	C	T,A,*	18750.5	SNV	AC=1,1,2;AF=0.0002,0.0002,0.000399;AN=5008;BaseQRankSum=-2.974;ClippingRankSum=0.000;DP=1211052;ExcessHet=3.0155;FS=0.000;InbreedingCoeff=-0.0006;MLEAC=1,1,2;MLEAF=0.0002,0.0002,0.000399;MQ=21.20;MQRankSum=-0.241;QD=3.34;ReadPosRankSum=0.185;SOR=0.062
chr21	8402552	13517	Terminator	G	A	7357.01	SNV	AC=125;AF=0.0255;AN=4904;BaseQRankSum=-0.000;ClippingRankSum=-0.000;DP=100335;ExcessHet=0.0649;FS=181.785;InbreedingCoeff=0.0266;MLEAC=121;MLEAF=0.0247;MQ=27.48;MQRankSum=-0.930;QD=7.62;ReadPosRankSum=0.967;SOR=5.756
chr21	8219506	13518	Terminator	G	C,*	17572.5	SNV	AC=1,2;AF=0.0002,0.000399;AN=5008;BaseQRankSum=3.732;ClippingRankSum=0.000;DP=1211801;ExcessHet=3.0129;FS=0.000;InbreedingCoeff=-0.0005;MLEAC=1,2;MLEAF=0.0002,0.000399;MQ=17.26;MQRankSum=2.300;QD=3.60;ReadPosRankSum=-1.011;SOR=0.069
chr21	8402553	13518	Terminator	C	T	84109.6	SNV	AC=162;AF=0.231;AN=700;BaseQRankSum=0.000;ClippingRankSum=0.000;DP=131964;ExcessHet=0.3152;FS=82.950;InbreedingCoeff=0.0206;MLEAC=219;MLEAF=0.313;MQ=5.84;MQRankSum=1.920;QD=26.28;ReadPosRankSum=-1.465;SOR=3.213
chr21	8446741	13519	Terminator	C	T	9338.34	SNV	AC=13;AF=0.00264;AN=4928;BaseQRankSum=-0.000;ClippingRankSum=-0.000;DP=61254;ExcessHet=3.3202;FS=0.000;InbreedingCoeff=-0.0117;MLEAC=13;MLEAF=0.00264;MQ=31.74;MQRankSum=-0.253;QD=20.57;ReadPosRankSum=1.036;SOR=0.811
chr21	8219508	13520	Terminator	G	GCCT,*	15950.5	SNV	AC=1,2;AF=0.0002,0.000399;AN=5008;BaseQRankSum=0.230;ClippingRankSum=0.000;DP=1212623;ExcessHet=3.0129;FS=0.000;InbreedingCoeff=-0.0005;MLEAC=1,2;MLEAF=0.0002,0.000399;MQ=18.60;MQRankSum=2.922;QD=3.15;ReadPosRankSum=-0.860;SOR=0.057
chr21	8219509	13521	Terminator	C	T,*	13325.5	SNV	AC=1,2;AF=0.0002,0.000399;AN=5008;BaseQRankSum=-5.030;ClippingRankSum=0.000;DP=1213190;ExcessHet=3.0129;FS=0.000;InbreedingCoeff=-0.0005;MLEAC=1,2;MLEAF=0.0002,0.000399;MQ=19.85;MQRankSum=1.204;QD=2.79;ReadPosRankSum=1.194;SOR=0.045
chr21	8219512	13524	Terminator	TCTC	T,*	16636.5	INDEL	AC=2,2;AF=0.000399,0.000399;AN=5008;BaseQRankSum=-0.163;ClippingRankSum=0.000;DP=1214127;ExcessHet=3.0155;FS=0.000;InbreedingCoeff=-0.0008;MLEAC=2,2;MLEAF=0.000399,0.000399;MQ=20.19;MQRankSum=0.822;QD=3.12;ReadPosRankSum=0.133;SOR=0.051
chr21	8446747	13525	Terminator	G	C	9671.51	SNV	AC=18;AF=0.00365;AN=4936;BaseQRankSum=0.000;ClippingRankSum=0.000;DP=62512;ExcessHet=3.3204;FS=0.000;InbreedingCoeff=-0.0118;MLEAC=18;MLEAF=0.00365;MQ=33.05;MQRankSum=-0.182;QD=13.78;ReadPosRankSum=1.308;SOR=0.268
chr21	8446748	13526	Terminator	C	T	9550.96	SNV	AC=18;AF=0.00365;AN=4936;BaseQRankSum=0.000;ClippingRankSum=0.000;DP=62697;ExcessHet=3.3690;FS=0.000;InbreedingCoeff=-0.0128;MLEAC=18;MLEAF=0.00365;MQ=33.02;MQRankSum=-0.182;QD=13.59;ReadPosRankSum=1.334;SOR=0.264
chr21	8446750	13528	Terminator	TCTCGCCGTGTCCCGGGTCGACCGGCGGGCCTTCTCCACCGAGCGGCGTGTAGGAGTGCCCGTCGGGACGAACCGCAACCGGAGCGTCCCCGTCTCGGTCGGCACCTCCGGGGTCGACCAGCTGCCGCCCGCGAGCTCCGGACTTAGCCGGCGC	ACTCGCCGTGTCCCGGGTCGACCGGCGGGCCTTCTCCACCGAGCGGCGTGTAGGAGTGCCCGTCGGGACGAACCGCAACCGGAGCGTCCCCGTCTCGGTCGGCACCTCCGGGGTCGACCAGCTGCCGCCCGCGAGCTCCGGACTTAGCCGGCGC,T	21025.6	INDEL	AC=61,1;AF=0.0124,0.000203;AN=4938;BaseQRankSum=0.000;ClippingRankSum=0.000;DP=64757;ExcessHet=4.7472;FS=0.000;InbreedingCoeff=-0.0011;MLEAC=60,1;MLEAF=0.0122,0.000203;MQ=33.30;MQRankSum=0.686;QD=7.48;ReadPosRankSum=-0.210;SOR=0.142
chr21	8446754	13532	Terminator	G	C,*	783.11	SNV	AC=3,1;AF=0.000607,0.000202;AN=4942;BaseQRankSum=-0.000;ClippingRankSum=0.000;DP=65299;ExcessHet=3.0130;FS=0.000;InbreedingCoeff=0.0314;MLEAC=3,1;MLEAF=0.000607,0.000202;MQ=22.95;MQRankSum=-0.241;QD=7.06;ReadPosRankSum=-0.524;SOR=0.148
chr21	8219522	13534	Terminator	G	A,*	14440.5	SNV	AC=1,2;AF=0.0002,0.000399;AN=5008;BaseQRankSum=-1.138;ClippingRankSum=0.000;DP=1215889;ExcessHet=3.0129;FS=0.000;InbreedingCoeff=-0.0005;MLEAC=1,2;MLEAF=0.0002,0.000399;MQ=19.91;MQRankSum=0.112;QD=2.71;ReadPosRankSum=1.941;SOR=0.050
chr21	8446756	13534	Terminator	C	A,*	2155.74	SNV	AC=2,3;AF=0.000404,0.000606;AN=4948;BaseQRankSum=-1.631;ClippingRankSum=0.000;DP=66130;ExcessHet=3.0192;FS=0.000;InbreedingCoeff=0.0054;MLEAC=2,2;MLEAF=0.000404,0.000404;MQ=27.87;MQRankSum=-1.018;QD=6.25;ReadPosRankSum=-0.236;SOR=0.114
chr21	8446758	13536	Terminator	T	C,*	2880.52	SNV	AC=9,3;AF=0.00182,0.000606;AN=4948;BaseQRankSum=0.511;ClippingRankSum=-0.000;DP=66744;ExcessHet=0.0296;FS=0.000;InbreedingCoeff=0.0333;MLEAC=7,2;MLEAF=0.00141,0.000404;MQ=31.13;MQRankSum=0.793;QD=6.15;ReadPosRankSum=-0.802;SOR=0.115
chr21	8446760	13538	Terminator	T	C,*	101808	SNV	AC=291,2;AF=0.059,0.000405;AN=4934;BaseQRankSum=0.000;ClippingRankSum=0.000;DP=72047;ExcessHet=11.5544;FS=0.000;InbreedingCoeff=-0.0243;MLEAC=291,1;MLEAF=0.059,0.000203;MQ=32.92;MQRankSum=0.163;QD=8.22;ReadPosRankSum=-0.040;SOR=0.209
chr21	8219527	13539	Terminator	G	C,*	13310.5	SNV	AC=1,2;AF=0.0002,0.000399;AN=5008;BaseQRankSum=0.787;ClippingRankSum=0.000;DP=1216259;ExcessHet=3.0129;FS=0.000;InbreedingCoeff=-0.0005;MLEAC=1,2;MLEAF=0.0002,0.000399;MQ=13.38;MQRankSum=1.779;QD=2.99;ReadPosRankSum=1.302;SOR=0.056
chr21	8219529	13541	Terminator	G	T,*	13718.5	SNV	AC=1,2;AF=0.0002,0.000399;AN=5008;BaseQRankSum=-7.838;ClippingRankSum=0.000;DP=1217978;ExcessHet=3.0129;FS=0.000;InbreedingCoeff=-0.0005;MLEAC=1,2;MLEAF=0.0002,0.000399;MQ=16.48;MQRankSum=2.232;QD=2.88;ReadPosRankSum=0.131;SOR=0.054
chr21	8219530	13542	Terminator	T	C,*	41403.4	SNV	AC=14,2;AF=0.0028,0.000399;AN=5008;BaseQRankSum=1.492;ClippingRankSum=0.000;DP=1227169;ExcessHet=3.1148;FS=0.000;InbreedingCoeff=-0.0031;MLEAC=14,2;MLEAF=0.0028,0.000399;MQ=34.68;MQRankSum=-0.143;QD=2.15;ReadPosRankSum=0.451;SOR=0.034
chr21	8219532	13544	Terminator	G	A,*	13510.5	SNV	AC=2,2;AF=0.000399,0.000399;AN=5008;BaseQRankSum=-5.417;ClippingRankSum=0.000;DP=1229466;ExcessHet=3.0155;FS=0.000;InbreedingCoeff=-0.0007;MLEAC=2,2;MLEAF=0.000399,0.000399;MQ=20.41;MQRankSum=2.369;QD=2.47;ReadPosRankSum=2.166;SOR=0.046
chr21	8402581	13546	Terminator	C	A	1056.77	SNV	AC=5;AF=0.001;AN=5000;BaseQRankSum=-0.000;ClippingRankSum=0.000;DP=221990;ExcessHet=3.0495;FS=42.094;InbreedingCoeff=-0.0022;MLEAC=5;MLEAF=0.001;MQ=27.88;MQRankSum=-1.036;QD=11.74;ReadPosRankSum=-0.807;SOR=4.407
chr21	8219535	13547	Terminator	G	C,*	13463.5	SNV	AC=1,2;AF=0.0002,0.000399;AN=5008;BaseQRankSum=-0.010;ClippingRankSum=0.000;DP=1229585;ExcessHet=3.0129;FS=0.000;InbreedingCoeff=-0.0006;MLEAC=1,2;MLEAF=0.0002,0.000399;MQ=14.34;MQRankSum=-1.309;QD=2.95;ReadPosRankSum=-0.006;SOR=0.055
chr21	8219536	13548	Terminator	T	G,C,*	17187.5	SNV	AC=1,1,2;AF=0.0002,0.0002,0.000399;AN=5008;BaseQRankSum=1.318;ClippingRankSum=0.000;DP=1231542;ExcessHet=3.0155;FS=0.000;InbreedingCoeff=-0.0008;MLEAC=1,1,2;MLEAF=0.0002,0.0002,0.000399;MQ=24.55;MQRankSum=-0.695;QD=2.64;ReadPosRankSum=1.358;SOR=0.046
chr21	8219537	13549	Terminator	G	GCCCGTCGGGACGAACCGCAACCGGAGCGTC,*	26730.5	INDEL	AC=3,2;AF=0.000599,0.000399;AN=5008;BaseQRankSum=-0.776;ClippingRankSum=0.000;DP=1231444;ExcessHet=3.0190;FS=0.000;InbreedingCoeff=-0.0010;MLEAC=3,2;MLEAF=0.000599,0.000399;MQ=22.81;MQRankSum=0.933;QD=4.60;ReadPosRankSum=-1.139;SOR=0.066
chr21	8446771	13549	Terminator	C	A,*	190.5	SNV	AC=4,1;AF=0.000806,0.000202;AN=4960;BaseQRankSum=-0.000;ClippingRankSum=-0.000;DP=73837;ExcessHet=0.0044;FS=0.000;InbreedingCoeff=0.0460;MLEAC=3,1;MLEAF=0.000605,0.000202;MQ=13.03;MQRankSum=0.842;QD=2.19;ReadPosRankSum=0.524;SOR=0.062
chr21	8446772	13550	Terminator	C	T,*	7419.9	SNV	AC=49,1;AF=0.00988,0.000202;AN=4962;BaseQRankSum=-0.000;ClippingRankSum=-0.000;DP=74401;ExcessHet=0.5762;FS=0.000;InbreedingCoeff=0.0144;MLEAC=43,1;MLEAF=0.00867,0.000202;MQ=32.62;MQRankSum=0.367;QD=3.52;ReadPosRankSum=0.891;SOR=0.058
chr21	8219547	13559	Terminator	A	G,*	68221.2	SNV	AC=14,2;AF=0.0028,0.000399;AN=5008;BaseQRankSum=0.732;ClippingRankSum=0.000;DP=1244566;ExcessHet=3.1147;FS=0.000;InbreedingCoeff=-0.0031;MLEAC=14,2;MLEAF=0.0028,0.000399;MQ=35.31;MQRankSum=-0.064;QD=2.96;ReadPosRankSum=0.299;SOR=0.046
chr21	8219548	13560	Terminator	C	G,*	13395.5	SNV	AC=1,2;AF=0.0002,0.000399;AN=5008;BaseQRankSum=1.207;ClippingRankSum=0.000;DP=1246704;ExcessHet=3.0129;FS=0.000;InbreedingCoeff=-0.0005;MLEAC=1,2;MLEAF=0.0002,0.000399;MQ=20.58;MQRankSum=3.634;QD=2.43;ReadPosRankSum=-1.396;SOR=0.043
chr21	8402595	13560	Terminator	A	G	160224	SNV	AC=132;AF=0.126;AN=1046;BaseQRankSum=0.524;ClippingRankSum=0.000;DP=318601;ExcessHet=106.3420;FS=123.238;InbreedingCoeff=-0.2155;MLEAC=277;MLEAF=0.265;MQ=6.35;MQRankSum=2.189;QD=23.81;ReadPosRankSum=-0.263;SOR=10.060
chr21	8446782	13560	Terminator	TCTC	T,CCTC,TCCTC	2037.95	SNV	AC=3,6,1;AF=0.000605,0.00121,0.000202;AN=4956;BaseQRankSum=0.000;ClippingRankSum=-0.000;DP=76085;ExcessHet=3.0510;FS=0.000;InbreedingCoeff=0.0193;MLEAC=3,6,1;MLEAF=0.000605,0.00121,0.000202;MQ=31.44;MQRankSum=0.697;QD=4.04;ReadPosRankSum=-0.541;SOR=0.017
chr21	8219550	13562	Terminator	A	T,*	16700.5	SNV	AC=1,2;AF=0.0002,0.000399;AN=5008;BaseQRankSum=1.306;ClippingRankSum=0.000;DP=1248352;ExcessHet=3.0129;FS=0.000;InbreedingCoeff=-0.0005;MLEAC=1,2;MLEAF=0.0002,0.000399;MQ=18.46;MQRankSum=3.689;QD=3.28;ReadPosRankSum=-0.855;SOR=0.061
chr21	8219551	13563	Terminator	A	G,*	48970.8	SNV	AC=12,2;AF=0.0024,0.000399;AN=5008;BaseQRankSum=-0.131;ClippingRankSum=0.000;DP=1261801;ExcessHet=3.0899;FS=0.000;InbreedingCoeff=-0.0019;MLEAC=12,2;MLEAF=0.0024,0.000399;MQ=32.76;MQRankSum=0.341;QD=3.37;ReadPosRankSum=-2.383;SOR=0.034
chr21	8219552	13564	Terminator	C	A,*	14194.5	SNV	AC=1,2;AF=0.0002,0.000399;AN=5008;BaseQRankSum=-0.062;ClippingRankSum=0.000;DP=1263556;ExcessHet=3.0129;FS=0.000;InbreedingCoeff=-0.0005;MLEAC=1,2;MLEAF=0.0002,0.000399;MQ=22.58;MQRankSum=1.251;QD=2.41;ReadPosRankSum=-0.260;SOR=0.043
chr21	8402599	13564	Terminator	T	G	114.66	SNV	AC=3;AF=0.0006;AN=5002;BaseQRankSum=-1.646;ClippingRankSum=0.000;DP=275421;ExcessHet=13.5192;FS=6.539;InbreedingCoeff=-0.0216;MLEAC=2;MLEAF=0.0004;MQ=37.53;MQRankSum=0.594;QD=1.15;ReadPosRankSum=-0.146;SOR=1.958
chr21	8219553	13565	Terminator	C	T,*	14008.5	SNV	AC=1,2;AF=0.0002,0.000399;AN=5008;BaseQRankSum=-1.559;ClippingRankSum=0.000;DP=1263632;ExcessHet=3.0129;FS=0.000;InbreedingCoeff=-0.0005;MLEAC=1,2;MLEAF=0.0002,0.000399;MQ=19.13;MQRankSum=1.369;QD=2.70;ReadPosRankSum=-2.406;SOR=0.045
chr21	8446787	13565	Terminator	A	C,*	7280.84	SNV	AC=20,1;AF=0.00403,0.000201;AN=4968;BaseQRankSum=0.424;ClippingRankSum=0.000;DP=76243;ExcessHet=3.1984;FS=0.000;InbreedingCoeff=0.0050;MLEAC=19,1;MLEAF=0.00382,0.000201;MQ=32.46;MQRankSum=0.935;QD=6.55;ReadPosRankSum=0.249;SOR=0.121
chr21	8219554	13566	Terminator	G	T,A,*	15016.5	SNV	AC=1,1,2;AF=0.0002,0.0002,0.000399;AN=5008;BaseQRankSum=1.676;ClippingRankSum=0.000;DP=1265640;ExcessHet=3.0155;FS=0.000;InbreedingCoeff=-0.0005;MLEAC=1,1,2;MLEAF=0.0002,0.0002,0.000399;MQ=25.11;MQRankSum=1.237;QD=2.22;ReadPosRankSum=2.133;SOR=0.039
chr21	8219555	13567	Terminator	C	G,T,*	63951.1	SNV	AC=18,1,2;AF=0.00359,0.0002,0.000399;AN=5008;BaseQRankSum=-1.918;ClippingRankSum=0.000;DP=1277527;ExcessHet=3.1943;FS=0.000;InbreedingCoeff=-0.0018;MLEAC=18,1,2;MLEAF=0.00359,0.0002,0.000399;MQ=35.21;MQRankSum=-2.017;QD=2.58;ReadPosRankSum=-5.448;SOR=0.022
chr21	8219557	13569	Terminator	A	C	64004.6	SNV	AC=19;AF=0.00379;AN=5008;BaseQRankSum=0.560;ClippingRankSum=0.000;DP=1283735;ExcessHet=3.7925;FS=0.000;InbreedingCoeff=-0.0063;MLEAC=19;MLEAF=0.00379;MQ=38.42;MQRankSum=-2.038;QD=3.10;ReadPosRankSum=-6.668;SOR=0.017
chr21	8219561	13573	Terminator	G	C	89950.4	SNV	AC=20;AF=0.00399;AN=5008;BaseQRankSum=0.956;ClippingRankSum=0.000;DP=1296337;ExcessHet=4.5390;FS=0.000;InbreedingCoeff=-0.0081;MLEAC=20;MLEAF=0.00399;MQ=38.45;MQRankSum=-1.394;QD=3.90;ReadPosRankSum=-9.196;SOR=0.029
chr21	8219562	13574	Terminator	A	C,G,*	112217	SNV	AC=20,2,2;AF=0.00399,0.000399,0.000399;AN=5008;BaseQRankSum=1.095;ClippingRankSum=0.000;DP=1307980;ExcessHet=3.2554;FS=0.000;InbreedingCoeff=0.0022;MLEAC=20,2,2;MLEAF=0.00399,0.000399,0.000399;MQ=35.93;MQRankSum=-1.512;QD=3.67;ReadPosRankSum=-9.025;SOR=0.038
chr21	8219563	13575	Terminator	G	A	438146	SNV	AC=108;AF=0.0216;AN=5008;BaseQRankSum=-1.426;ClippingRankSum=0.000;DP=1380368;ExcessHet=9.0138;FS=0.000;InbreedingCoeff=-0.0230;MLEAC=108;MLEAF=0.0216;MQ=38.72;MQRankSum=0.314;QD=2.72;ReadPosRankSum=-0.164;SOR=0.040
chr21	8219566	13578	Terminator	T	G,*	22174.7	SNV	AC=2,2;AF=0.000399,0.000399;AN=5008;BaseQRankSum=-0.476;ClippingRankSum=0.000;DP=1390009;ExcessHet=3.0155;FS=0.000;InbreedingCoeff=-0.0004;MLEAC=2,2;MLEAF=0.000399,0.000399;MQ=24.03;MQRankSum=5.477;QD=3.45;ReadPosRankSum=-0.204;SOR=0.062
chr21	8446800	13578	Terminator	T	C,*	14151.7	SNV	AC=63,1;AF=0.0127,0.000201;AN=4970;BaseQRankSum=0.728;ClippingRankSum=0.000;DP=80496;ExcessHet=1.0000;FS=0.000;InbreedingCoeff=0.0146;MLEAC=58,1;MLEAF=0.0117,0.000201;MQ=32.81;MQRankSum=0.239;QD=4.71;ReadPosRankSum=0.939;SOR=0.070
chr21	8446802	13580	Terminator	G	A,GGAGT	15250.7	SNV	AC=66,1;AF=0.0133,0.000202;AN=4960;BaseQRankSum=-0.903;ClippingRankSum=0.000;DP=80715;ExcessHet=1.1066;FS=0.000;InbreedingCoeff=0.0090;MLEAC=62,1;MLEAF=0.0125,0.000202;MQ=33.20;MQRankSum=0.000;QD=6.60;ReadPosRankSum=-0.984;SOR=0.101
chr21	8446805	13583	Terminator	G	C,*	351.14	SNV	AC=6,1;AF=0.00121,0.000201;AN=4974;BaseQRankSum=0.000;ClippingRankSum=0.000;DP=80833;ExcessHet=3.0290;FS=0.000;InbreedingCoeff=0.0072;MLEAC=5,1;MLEAF=0.00101,0.000201;MQ=28.67;MQRankSum=-0.145;QD=1.57;ReadPosRankSum=0.464;SOR=0.015
chr21	8219576	13588	Terminator	G	C,*	25366.6	SNV	AC=2,2;AF=0.000399,0.000399;AN=5008;BaseQRankSum=4.161;ClippingRankSum=0.000;DP=1399704;ExcessHet=3.0155;FS=0.000;InbreedingCoeff=-0.0005;MLEAC=2,2;MLEAF=0.000399,0.000399;MQ=25.72;MQRankSum=2.181;QD=3.64;ReadPosRankSum=2.945;SOR=0.065
chr21	8219577	13589	Terminator	G	C,T,*	18815.5	SNV	AC=2,2,1;AF=0.000399,0.000399,0.0002;AN=5008;BaseQRankSum=1.925;ClippingRankSum=0.000;DP=1404258;ExcessHet=3.0190;FS=0.000;InbreedingCoeff=-0.0008;MLEAC=2,2,1;MLEAF=0.000399,0.000399,0.0002;MQ=35.71;MQRankSum=1.542;QD=2.27;ReadPosRankSum=0.508;SOR=0.035
chr21	8219578	13590	Terminator	T	C	7436.08	SNV	AC=6;AF=0.0012;AN=5008;BaseQRankSum=1.308;ClippingRankSum=0.000;DP=1413389;ExcessHet=3.0892;FS=0.000;InbreedingCoeff=-0.0020;MLEAC=5;MLEAF=0.000998;MQ=38.70;MQRankSum=0.688;QD=0.80;ReadPosRankSum=-0.611;SOR=0.016
chr21	8219581	13593	Terminator	G	A,*	13600.5	SNV	AC=3,1;AF=0.000599,0.0002;AN=5008;BaseQRankSum=-1.468;ClippingRankSum=0.000;DP=1414648;ExcessHet=3.0155;FS=0.000;InbreedingCoeff=-0.0008;MLEAC=3,1;MLEAF=0.000599,0.0002;MQ=34.79;MQRankSum=0.904;QD=2.09;ReadPosRankSum=-0.108;SOR=0.021
chr21	8402629	13594	Terminator	T	G	545.29	SNV	AC=3;AF=0.0006;AN=5000;BaseQRankSum=-3.842;ClippingRankSum=0.000;DP=286042;ExcessHet=7.3300;FS=8.747;InbreedingCoeff=-0.0123;MLEAC=3;MLEAF=0.0006;MQ=36.72;MQRankSum=0.785;QD=1.79;ReadPosRankSum=0.508;SOR=3.992
chr21	8446817	13595	Terminator	A	G,*	24272.3	SNV	AC=37,1;AF=0.00743,0.000201;AN=4980;BaseQRankSum=0.529;ClippingRankSum=0.000;DP=81417;ExcessHet=3.6434;FS=0.000;InbreedingCoeff=0.0011;MLEAC=36,1;MLEAF=0.00723,0.000201;MQ=32.27;MQRankSum=0.751;QD=9.80;ReadPosRankSum=0.668;SOR=0.137
chr21	8446821	13599	Terminator	A	G	100794	SNV	AC=301;AF=0.0609;AN=4946;BaseQRankSum=0.000;ClippingRankSum=0.000;DP=83592;ExcessHet=35.4662;FS=0.000;InbreedingCoeff=-0.0629;MLEAC=314;MLEAF=0.0635;MQ=33.75;MQRankSum=0.437;QD=11.16;ReadPosRankSum=-1.080;SOR=0.190
chr21	8446823	13601	Terminator	C	T,A,*	35152.6	SNV	AC=38,7,1;AF=0.00763,0.00141,0.000201;AN=4978;BaseQRankSum=0.000;ClippingRankSum=0.000;DP=83600;ExcessHet=3.9340;FS=0.000;InbreedingCoeff=0.0047;MLEAC=37,7,1;MLEAF=0.00743,0.00141,0.000201;MQ=32.04;MQRankSum=0.555;QD=10.19;ReadPosRankSum=0.522;SOR=0.220
chr21	8446825	13603	Terminator	C	G	93583.5	SNV	AC=293;AF=0.0593;AN=4944;BaseQRankSum=0.000;ClippingRankSum=-0.000;DP=83885;ExcessHet=33.5940;FS=0.000;InbreedingCoeff=-0.0614;MLEAC=318;MLEAF=0.0643;MQ=33.79;MQRankSum=0.428;QD=11.09;ReadPosRankSum=-1.067;SOR=0.152
chr21	8402639	13604	Terminator	G	A	4757.61	SNV	AC=3;AF=0.0006;AN=4996;BaseQRankSum=-0.156;ClippingRankSum=0.000;DP=286978;ExcessHet=3.8267;FS=20.267;InbreedingCoeff=-0.0053;MLEAC=3;MLEAF=0.0006;MQ=28.85;MQRankSum=1.109;QD=8.23;ReadPosRankSum=3.329;SOR=6.044
chr21	8446827	13605	Terminator	A	C	89887	SNV	AC=290;AF=0.0587;AN=4942;BaseQRankSum=-0.000;ClippingRankSum=0.000;DP=84084;ExcessHet=30.7594;FS=0.000;InbreedingCoeff=-0.0602;MLEAC=315;MLEAF=0.0637;MQ=33.81;MQRankSum=0.461;QD=11.00;ReadPosRankSum=-1.060;SOR=0.131
chr21	8446830	13608	Terminator	G	T,*	302.09	SNV	AC=2,1;AF=0.000401,0.000201;AN=4982;BaseQRankSum=0.796;ClippingRankSum=-0.000;DP=84184;ExcessHet=0.0013;FS=0.000;InbreedingCoeff=0.0471;MLEAC=1,1;MLEAF=0.000201,0.000201;MQ=22.55;MQRankSum=0.282;QD=3.60;ReadPosRankSum=-1.085;SOR=0.041
chr21	8446831	13609	Terminator	G	C	77023.3	SNV	AC=276;AF=0.056;AN=4932;BaseQRankSum=-0.000;ClippingRankSum=0.000;DP=85079;ExcessHet=41.0014;FS=0.000;InbreedingCoeff=-0.0674;MLEAC=284;MLEAF=0.0576;MQ=33.72;MQRankSum=0.415;QD=9.72;ReadPosRankSum=-1.022;SOR=0.388
chr21	8446832	13610	Terminator	A	C	74640.9	SNV	AC=276;AF=0.056;AN=4928;BaseQRankSum=0.000;ClippingRankSum=0.000;DP=85707;ExcessHet=45.2671;FS=0.000;InbreedingCoeff=-0.0708;MLEAC=290;MLEAF=0.0588;MQ=33.66;MQRankSum=0.429;QD=9.40;ReadPosRankSum=-0.967;SOR=0.390
chr21	8446833	13611	Terminator	G	A	58902.9	SNV	AC=93;AF=0.0187;AN=4982;BaseQRankSum=0.000;ClippingRankSum=0.000;DP=86874;ExcessHet=3.0120;FS=0.000;InbreedingCoeff=-0.0108;MLEAC=92;MLEAF=0.0185;MQ=32.03;MQRankSum=-1.183;QD=8.39;ReadPosRankSum=0.155;SOR=0.268
chr21	8402655	13620	Terminator	G	A,T	9891.53	SNV	AC=2,2;AF=0.000399,0.000399;AN=5008;BaseQRankSum=-0.260;ClippingRankSum=0.000;DP=287922;ExcessHet=3.0155;FS=7.270;InbreedingCoeff=-0.0005;MLEAC=2,2;MLEAF=0.000399,0.000399;MQ=37.62;MQRankSum=4.920;QD=6.38;ReadPosRankSum=0.950;SOR=6.165
chr21	8402658	13623	Terminator	G	C	1366.9	SNV	AC=10;AF=0.002;AN=5008;BaseQRankSum=0.423;ClippingRankSum=0.000;DP=288025;ExcessHet=3.0780;FS=4.227;InbreedingCoeff=-0.0025;MLEAC=10;MLEAF=0.002;MQ=37.12;MQRankSum=1.679;QD=0.84;ReadPosRankSum=0.619;SOR=5.832
chr21	8219613	13625	Terminator	A	G,C	25967.5	SNV	AC=3,1;AF=0.000599,0.0002;AN=5008;BaseQRankSum=0.742;ClippingRankSum=0.000;DP=1432793;ExcessHet=3.0155;FS=0.000;InbreedingCoeff=-0.0007;MLEAC=3,1;MLEAF=0.000599,0.0002;MQ=38.93;MQRankSum=-1.193;QD=3.05;ReadPosRankSum=3.396;SOR=0.031
chr21	8219614	13626	Terminator	GCTC	G	15337.4	INDEL	AC=3;AF=0.000599;AN=5008;BaseQRankSum=-1.370;ClippingRankSum=0.000;DP=1433119;ExcessHet=3.0129;FS=0.000;InbreedingCoeff=-0.0006;MLEAC=3;MLEAF=0.000599;MQ=38.86;MQRankSum=-4.681;QD=2.37;ReadPosRankSum=3.675;SOR=0.018
chr21	8219619	13631	Terminator	G	GTGA	15442.4	INDEL	AC=3;AF=0.000599;AN=5008;BaseQRankSum=-0.284;ClippingRankSum=0.000;DP=1434375;ExcessHet=3.0155;FS=0.000;InbreedingCoeff=-0.0007;MLEAC=3;MLEAF=0.000599;MQ=38.86;MQRankSum=-4.571;QD=2.38;ReadPosRankSum=3.704;SOR=0.018
chr21	8446853	13631	Terminator	A	ACCT,*	8984.65	INDEL	AC=18,1;AF=0.0036,0.0002;AN=4996;BaseQRankSum=0.000;ClippingRankSum=0.000;DP=94812;ExcessHet=3.1611;FS=0.000;InbreedingCoeff=-0.0004;MLEAC=18,1;MLEAF=0.0036,0.0002;MQ=33.13;MQRankSum=0.159;QD=8.02;ReadPosRankSum=0.629;SOR=0.108
chr21	8219621	13633	Terminator	A	C	15508.5	SNV	AC=4;AF=0.000799;AN=5008;BaseQRankSum=0.896;ClippingRankSum=0.000;DP=1441164;ExcessHet=3.0155;FS=0.000;InbreedingCoeff=-0.0008;MLEAC=4;MLEAF=0.000799;MQ=39.03;MQRankSum=0.787;QD=1.94;ReadPosRankSum=0.177;SOR=0.028
chr21	8219624	13636	Terminator	TAGCC	CAGCC,T,*	86838	SNV	AC=11,5,1;AF=0.0022,0.000998,0.0002;AN=5008;BaseQRankSum=1.296;ClippingRankSum=0.000;DP=1473460;ExcessHet=3.1292;FS=0.000;InbreedingCoeff=-0.0014;MLEAC=11,5,1;MLEAF=0.0022,0.000998,0.0002;MQ=37.78;MQRankSum=0.294;QD=2.52;ReadPosRankSum=-0.449;SOR=0.024
chr21	8219625	13637	Terminator	A	C,G,*	31526.5	SNV	AC=1,4,5;AF=0.0002,0.000799,0.000998;AN=5008;BaseQRankSum=0.882;ClippingRankSum=0.000;DP=1482512;ExcessHet=3.0494;FS=0.000;InbreedingCoeff=-0.0017;MLEAC=1,4,5;MLEAF=0.0002,0.000799,0.000998;MQ=24.31;MQRankSum=0.843;QD=1.64;ReadPosRankSum=0.080;SOR=0.015
chr21	8219626	13638	Terminator	G	C,*	26597.3	SNV	AC=1,5;AF=0.0002,0.000998;AN=5008;BaseQRankSum=-0.693;ClippingRankSum=0.000;DP=1483635;ExcessHet=3.0233;FS=0.000;InbreedingCoeff=-0.0011;MLEAC=1,5;MLEAF=0.0002,0.000998;MQ=12.41;MQRankSum=3.485;QD=2.03;ReadPosRankSum=1.711;SOR=0.017
chr21	8219627	13639	Terminator	C	G,*	24754.3	SNV	AC=1,5;AF=0.0002,0.000998;AN=5008;BaseQRankSum=-1.400;ClippingRankSum=0.000;DP=1485441;ExcessHet=3.0233;FS=0.000;InbreedingCoeff=-0.0011;MLEAC=1,5;MLEAF=0.0002,0.000998;MQ=13.81;MQRankSum=0.029;QD=1.82;ReadPosRankSum=0.285;SOR=0.016
chr21	8446862	13640	Terminator	G	T,GT,*	10280.1	SNV	AC=2,1,1;AF=0.0004,0.0002,0.0002;AN=4996;BaseQRankSum=0.272;ClippingRankSum=0.000;DP=97106;ExcessHet=3.0155;FS=0.000;InbreedingCoeff=0.0037;MLEAC=2,1,1;MLEAF=0.0004,0.0002,0.0002;MQ=33.00;MQRankSum=5.023;QD=17.85;ReadPosRankSum=2.696;SOR=0.773
chr21	8219629	13641	Terminator	G	T	15672.2	SNV	AC=12;AF=0.0024;AN=5008;BaseQRankSum=1.995;ClippingRankSum=0.000;DP=1505664;ExcessHet=3.1431;FS=0.000;InbreedingCoeff=-0.0030;MLEAC=11;MLEAF=0.0022;MQ=38.86;MQRankSum=-1.963;QD=0.88;ReadPosRankSum=-0.509;SOR=0.015
chr21	8446863	13641	Terminator	T	A,*	358	SNV	AC=2,1;AF=0.0004,0.0002;AN=4994;BaseQRankSum=-0.654;ClippingRankSum=0.000;DP=97294;ExcessHet=3.0129;FS=0.000;InbreedingCoeff=0.0061;MLEAC=2,1;MLEAF=0.0004,0.0002;MQ=20.57;MQRankSum=1.575;QD=1.75;ReadPosRankSum=0.169;SOR=0.021
chr21	8219633	13645	Terminator	C	T	4.30822e+06	SNV	AC=677;AF=0.135;AN=5008;BaseQRankSum=-4.253;ClippingRankSum=0.000;DP=2612971;ExcessHet=250.6651;FS=0.000;InbreedingCoeff=-0.1602;MLEAC=679;MLEAF=0.136;MQ=38.96;MQRankSum=-0.667;QD=2.92;ReadPosRankSum=-0.084;SOR=0.040
chr21	8446869	13647	Terminator	A	G,*	235.88	SNV	AC=2,1;AF=0.0004,0.0002;AN=4994;BaseQRankSum=-1.557;ClippingRankSum=0.000;DP=98642;ExcessHet=3.0129;FS=0.000;InbreedingCoeff=0.0015;MLEAC=2,1;MLEAF=0.0004,0.0002;MQ=23.36;MQRankSum=-1.277;QD=1.27;ReadPosRankSum=0.972;SOR=0.009
chr21	8402683	13648	Terminator	GACTTAGCCGGCGTCTGC	GACTTACTTAGCCGGCGTCTGC,G	5952.54	INDEL	AC=3,1;AF=0.000599,0.0002;AN=5008;BaseQRankSum=0.000;ClippingRankSum=0.000;DP=288801;ExcessHet=3.0155;FS=29.938;InbreedingCoeff=-0.0006;MLEAC=3,1;MLEAF=0.000599,0.0002;MQ=36.83;MQRankSum=1.367;QD=10.05;ReadPosRankSum=-0.105;SOR=4.645
chr21	8219637	13649	Terminator	CA	C,TA	32754.3	SNV	AC=1,15;AF=0.0002,0.003;AN=5008;BaseQRankSum=-7.405;ClippingRankSum=0.000;DP=2603282;ExcessHet=3.1147;FS=0.000;InbreedingCoeff=-0.0031;MLEAC=1,15;MLEAF=0.0002,0.003;MQ=38.87;MQRankSum=3.023;QD=1.14;ReadPosRankSum=-1.002;SOR=0.019
chr21	8402684	13649	Terminator	A	C,*	1169.37	SNV	AC=8,1;AF=0.0016,0.0002;AN=5008;BaseQRankSum=0.000;ClippingRankSum=0.000;DP=288895;ExcessHet=3.0417;FS=31.129;InbreedingCoeff=-0.0013;MLEAC=7,1;MLEAF=0.0014,0.0002;MQ=30.55;MQRankSum=-1.353;QD=3.16;ReadPosRankSum=0.671;SOR=1.444
chr21	8402685	13650	Terminator	CTT	C,CTTTT,*	6235.8	INDEL	AC=1,6,1;AF=0.0002,0.0012,0.0002;AN=5008;BaseQRankSum=0.431;ClippingRankSum=0.000;DP=289241;ExcessHet=3.0346;FS=13.161;InbreedingCoeff=-0.0014;MLEAC=1,6,1;MLEAF=0.0002,0.0012,0.0002;MQ=36.61;MQRankSum=1.651;QD=5.12;ReadPosRankSum=0.093;SOR=7.262
chr21	8402687	13652	Terminator	TAGCC	T,CAGCC,*	36068.7	INDEL	AC=24,8,2;AF=0.00479,0.0016,0.0004;AN=5006;BaseQRankSum=-0.243;ClippingRankSum=0.000;DP=289901;ExcessHet=3.5081;FS=32.838;InbreedingCoeff=-0.0001;MLEAC=22,6,2;MLEAF=0.00439,0.0012,0.0004;MQ=32.94;MQRankSum=-0.143;QD=10.44;ReadPosRankSum=0.968;SOR=7.545
chr21	8219641	13653	Terminator	T	C,G	118981	SNV	AC=32,2;AF=0.00639,0.000399;AN=5008;BaseQRankSum=1.387;ClippingRankSum=0.000;DP=2603693;ExcessHet=3.5001;FS=0.000;InbreedingCoeff=-0.0068;MLEAC=31,2;MLEAF=0.00619,0.000399;MQ=39.01;MQRankSum=1.862;QD=1.82;ReadPosRankSum=-0.123;SOR=0.027
chr21	8402688	13653	Terminator	A	C,*	35384.9	SNV	AC=3,25;AF=0.000599,0.00499;AN=5008;BaseQRankSum=-1.583;ClippingRankSum=0.000;DP=288762;ExcessHet=3.3402;FS=36.693;InbreedingCoeff=-0.0053;MLEAC=3,23;MLEAF=0.000599,0.00459;MQ=7.39;MQRankSum=-4.009;QD=11.22;ReadPosRankSum=-0.761;SOR=6.630
chr21	8402689	13654	Terminator	G	T,*	43071.9	SNV	AC=8,25;AF=0.0016,0.00499;AN=5008;BaseQRankSum=-1.042;ClippingRankSum=0.000;DP=288973;ExcessHet=3.4714;FS=34.131;InbreedingCoeff=-0.0064;MLEAC=8,23;MLEAF=0.0016,0.00459;MQ=19.80;MQRankSum=4.388;QD=9.59;ReadPosRankSum=0.381;SOR=7.747
chr21	8219644	13656	Terminator	C	T,G	31144.5	SNV	AC=1,4;AF=0.0002,0.000799;AN=5008;BaseQRankSum=0.311;ClippingRankSum=0.000;DP=2603164;ExcessHet=3.0190;FS=0.000;InbreedingCoeff=-0.0010;MLEAC=1,4;MLEAF=0.0002,0.000799;MQ=38.84;MQRankSum=1.388;QD=3.18;ReadPosRankSum=-0.288;SOR=0.049
chr21	8402691	13656	Terminator	C	T,*	109475	SNV	AC=89,23;AF=0.0178,0.00459;AN=5008;BaseQRankSum=-0.326;ClippingRankSum=0.000;DP=290493;ExcessHet=8.5376;FS=30.879;InbreedingCoeff=-0.0224;MLEAC=86,21;MLEAF=0.0172,0.00419;MQ=32.58;MQRankSum=1.401;QD=7.48;ReadPosRankSum=-0.039;SOR=9.072
chr21	8402692	13657	Terminator	G	T,*	2870.88	SNV	AC=10,1;AF=0.002,0.0002;AN=5000;BaseQRankSum=-2.171;ClippingRankSum=0.000;DP=287505;ExcessHet=3.0585;FS=55.637;InbreedingCoeff=-0.0010;MLEAC=9,1;MLEAF=0.0018,0.0002;MQ=23.56;MQRankSum=-2.412;QD=3.64;ReadPosRankSum=0.528;SOR=9.008
chr21	8219647	13659	Terminator	G	A	8570.45	SNV	AC=3;AF=0.000599;AN=5008;BaseQRankSum=-8.800;ClippingRankSum=0.000;DP=2607906;ExcessHet=3.0129;FS=0.000;InbreedingCoeff=-0.0006;MLEAC=3;MLEAF=0.000599;MQ=39.14;MQRankSum=-0.552;QD=1.46;ReadPosRankSum=-1.009;SOR=0.029
chr21	8402694	13659	Terminator	C	T,G,*	44785.7	SNV	AC=34,1,1;AF=0.00679,0.0002,0.0002;AN=5008;BaseQRankSum=-0.870;ClippingRankSum=0.000;DP=287442;ExcessHet=3.5605;FS=26.262;InbreedingCoeff=-0.0071;MLEAC=33,1,1;MLEAF=0.00659,0.0002,0.0002;MQ=37.13;MQRankSum=2.849;QD=8.48;ReadPosRankSum=-0.019;SOR=7.933
chr21	8402696	13661	Terminator	T	C	2.24225e+06	SNV	AC=1408;AF=0.281;AN=5008;BaseQRankSum=0.003;ClippingRankSum=0.000;DP=307861;ExcessHet=819.3729;FS=39.285;InbreedingCoeff=-0.3425;MLEAC=1416;MLEAF=0.283;MQ=36.58;MQRankSum=4.021;QD=11.16;ReadPosRankSum=-0.487;SOR=5.292
chr21	8446883	13661	Terminator	A	G,*	4112.76	SNV	AC=3,1;AF=0.0006,0.0002;AN=5000;BaseQRankSum=0.425;ClippingRankSum=0.000;DP=101916;ExcessHet=3.0155;FS=0.000;InbreedingCoeff=0.0004;MLEAC=3,1;MLEAF=0.0006,0.0002;MQ=32.05;MQRankSum=-1.278;QD=8.84;ReadPosRankSum=1.246;SOR=0.112
chr21	8446884	13662	Terminator	GCTC	G,ACTC,*	13164.8	SNV	AC=4,23,1;AF=0.0008,0.0046,0.0002;AN=5002;BaseQRankSum=-1.055;ClippingRankSum=0.000;DP=103384;ExcessHet=3.3414;FS=0.000;InbreedingCoeff=-0.0025;MLEAC=4,20,1;MLEAF=0.0008,0.004,0.0002;MQ=33.34;MQRankSum=0.099;QD=5.56;ReadPosRankSum=0.347;SOR=0.072
chr21	8219652	13664	Terminator	G	C	1.09515e+06	SNV	AC=200;AF=0.0399;AN=5008;BaseQRankSum=3.170;ClippingRankSum=0.000;DP=2839050;ExcessHet=22.2449;FS=0.000;InbreedingCoeff=-0.0423;MLEAC=199;MLEAF=0.0397;MQ=39.06;MQRankSum=1.384;QD=2.47;ReadPosRankSum=0.034;SOR=0.035
chr21	8402699	13664	Terminator	G	C,A,*	884.5	SNV	AC=1,1,1;AF=0.0002,0.0002,0.0002;AN=5008;BaseQRankSum=0.000;ClippingRankSum=0.000;DP=201425;ExcessHet=3.0129;FS=65.818;InbreedingCoeff=-0.0002;MLEAC=1,1,1;MLEAF=0.0002,0.0002,0.0002;MQ=26.14;MQRankSum=3.052;QD=6.75;ReadPosRankSum=0.407;SOR=6.510
chr21	8446889	13667	Terminator	G	GTGA	7322.52	INDEL	AC=4;AF=0.0008;AN=5002;BaseQRankSum=-0.811;ClippingRankSum=0.000;DP=104212;ExcessHet=3.0190;FS=0.000;InbreedingCoeff=-0.0019;MLEAC=4;MLEAF=0.0008;MQ=35.29;MQRankSum=-0.670;QD=12.31;ReadPosRankSum=2.327;SOR=0.232
chr21	8219656	13668	Terminator	A	G	50667.1	SNV	AC=15;AF=0.003;AN=5008;BaseQRankSum=0.550;ClippingRankSum=0.000;DP=2827690;ExcessHet=3.1016;FS=0.000;InbreedingCoeff=-0.0030;MLEAC=15;MLEAF=0.003;MQ=38.98;MQRankSum=1.574;QD=1.62;ReadPosRankSum=0.272;SOR=0.024
chr21	8402704	13669	Terminator	T	C	410.54	SNV	AC=4;AF=0.000799;AN=5008;BaseQRankSum=0.000;ClippingRankSum=0.000;DP=201223;ExcessHet=3.0285;FS=0.000;InbreedingCoeff=-0.0012;MLEAC=3;MLEAF=0.000599;MQ=33.25;MQRankSum=0.555;QD=2.43;ReadPosRankSum=0.538;SOR=0.651
chr21	8446891	13669	Terminator	A	C,*	32610.6	SNV	AC=113,1;AF=0.0226,0.0002;AN=5004;BaseQRankSum=0.401;ClippingRankSum=0.000;DP=111307;ExcessHet=8.8546;FS=0.000;InbreedingCoeff=-0.0223;MLEAC=110,1;MLEAF=0.022,0.0002;MQ=33.18;MQRankSum=-2.440;QD=3.58;ReadPosRankSum=1.219;SOR=0.301
chr21	8446892	13670	Terminator	CTT	C,*	16964	INDEL	AC=37,1;AF=0.00739,0.0002;AN=5004;BaseQRankSum=0.000;ClippingRankSum=0.000;DP=112759;ExcessHet=3.6263;FS=0.000;InbreedingCoeff=-0.0067;MLEAC=36,1;MLEAF=0.00719,0.0002;MQ=34.30;MQRankSum=0.219;QD=6.73;ReadPosRankSum=0.472;SOR=0.065
chr21	8446894	13672	Terminator	TAGCC	CAGCC,T,*	27726.7	INDEL	AC=8,2,38;AF=0.0016,0.0004,0.00759;AN=5004;BaseQRankSum=0.426;ClippingRankSum=0.000;DP=113717;ExcessHet=4.0027;FS=0.000;InbreedingCoeff=-0.0065;MLEAC=7,2,37;MLEAF=0.0014,0.0004,0.00739;MQ=20.96;MQRankSum=0.919;QD=7.31;ReadPosRankSum=0.330;SOR=0.070
chr21	8402708	13673	Terminator	C	T	1242.94	SNV	AC=6;AF=0.0012;AN=5008;BaseQRankSum=0.000;ClippingRankSum=0.000;DP=200896;ExcessHet=3.0233;FS=0.955;InbreedingCoeff=-0.0013;MLEAC=5;MLEAF=0.000998;MQ=34.15;MQRankSum=-1.073;QD=2.75;ReadPosRankSum=0.331;SOR=0.467
chr21	8446895	13673	Terminator	A	G,C,*	20229.8	SNV	AC=8,6,3;AF=0.0016,0.0012,0.000601;AN=4994;BaseQRankSum=0.838;ClippingRankSum=0.000;DP=114504;ExcessHet=3.1308;FS=0.000;InbreedingCoeff=0.0054;MLEAC=8,6,3;MLEAF=0.0016,0.0012,0.000601;MQ=30.71;MQRankSum=2.406;QD=9.74;ReadPosRankSum=-0.454;SOR=0.207
chr21	8402709	13674	Terminator	C	T	2764.5	SNV	AC=4;AF=0.000799;AN=5008;BaseQRankSum=-1.261;ClippingRankSum=0.000;DP=200401;ExcessHet=3.0155;FS=51.864;InbreedingCoeff=-0.0009;MLEAC=4;MLEAF=0.000799;MQ=36.62;MQRankSum=1.989;QD=8.04;ReadPosRankSum=0.288;SOR=7.247
chr21	8446898	13676	Terminator	C	T,*	2643.6	SNV	AC=1,3;AF=0.0002,0.0006;AN=5002;BaseQRankSum=0.569;ClippingRankSum=0.000;DP=114879;ExcessHet=3.0155;FS=0.000;InbreedingCoeff=-0.0000;MLEAC=1,3;MLEAF=0.0002,0.0006;MQ=16.31;MQRankSum=1.220;QD=7.34;ReadPosRankSum=0.993;SOR=0.054
chr21	8446899	13677	Terminator	G	T,*	86979.9	SNV	AC=118,1;AF=0.0236,0.0002;AN=5000;BaseQRankSum=0.832;ClippingRankSum=0.000;DP=122728;ExcessHet=9.2727;FS=0.000;InbreedingCoeff=-0.0235;MLEAC=118,1;MLEAF=0.0236,0.0002;MQ=34.13;MQRankSum=-0.363;QD=6.14;ReadPosRankSum=-0.028;SOR=0.093
chr21	8446903	13681	Terminator	C	T	866206	SNV	AC=1007;AF=0.201;AN=5002;BaseQRankSum=-0.267;ClippingRankSum=0.000;DP=163699;ExcessHet=441.1467;FS=0.000;InbreedingCoeff=-0.2397;MLEAC=1016;MLEAF=0.203;MQ=34.52;MQRankSum=-0.296;QD=9.22;ReadPosRankSum=-0.158;SOR=0.109
chr21	8402719	13684	Terminator	A	G	53976.4	SNV	AC=77;AF=0.0154;AN=5008;BaseQRankSum=0.386;ClippingRankSum=0.000;DP=199879;ExcessHet=5.8614;FS=12.661;InbreedingCoeff=-0.0162;MLEAC=70;MLEAF=0.014;MQ=34.22;MQRankSum=-0.115;QD=6.61;ReadPosRankSum=0.327;SOR=1.873
chr21	8446907	13685	Terminator	C	T	125105	SNV	AC=204;AF=0.0408;AN=5002;BaseQRankSum=-1.083;ClippingRankSum=0.000;DP=162567;ExcessHet=25.9439;FS=0.000;InbreedingCoeff=-0.0460;MLEAC=202;MLEAF=0.0404;MQ=34.64;MQRankSum=0.564;QD=6.48;ReadPosRankSum=0.451;SOR=0.117
chr21	8446909	13687	Terminator	C	G	195.78	SNV	AC=4;AF=0.0008;AN=5002;BaseQRankSum=0.000;ClippingRankSum=0.000;DP=160182;ExcessHet=3.0233;FS=0.000;InbreedingCoeff=-0.0016;MLEAC=4;MLEAF=0.0008;MQ=34.99;MQRankSum=-0.838;QD=1.13;ReadPosRankSum=0.000;SOR=0.022
chr21	8446911	13689	Terminator	T	G,C	37914.7	SNV	AC=4,64;AF=0.0008,0.0128;AN=5002;BaseQRankSum=0.375;ClippingRankSum=0.000;DP=160885;ExcessHet=5.0193;FS=0.000;InbreedingCoeff=-0.0128;MLEAC=4,61;MLEAF=0.0008,0.0122;MQ=34.35;MQRankSum=0.092;QD=5.09;ReadPosRankSum=-0.165;SOR=0.016
chr21	8219684	13696	Terminator	ACCGACGCGAGGGCGTCGATTC	A,CCCGACGCGAGGGCGTCGATTC	4.69825e+06	INDEL	AC=697,3;AF=0.139,0.000599;AN=5008;BaseQRankSum=-0.102;ClippingRankSum=0.000;DP=3768747;ExcessHet=250.7111;FS=0.000;InbreedingCoeff=-0.1625;MLEAC=697,3;MLEAF=0.139,0.000599;MQ=39.18;MQRankSum=1.050;QD=3.05;ReadPosRankSum=-0.311;SOR=0.044
chr21	8446921	13699	Terminator	C	A	1490.5	SNV	AC=3;AF=0.0006;AN=5002;BaseQRankSum=-0.253;ClippingRankSum=0.000;DP=160906;ExcessHet=3.0155;FS=0.000;InbreedingCoeff=-0.0011;MLEAC=3;MLEAF=0.0006;MQ=33.00;MQRankSum=-1.952;QD=6.21;ReadPosRankSum=1.069;SOR=0.452
chr21	8402735	13700	Terminator	A	C	101068	SNV	AC=55;AF=0.011;AN=5006;BaseQRankSum=0.471;ClippingRankSum=0.000;DP=194430;ExcessHet=4.3608;FS=52.652;InbreedingCoeff=-0.0114;MLEAC=55;MLEAF=0.011;MQ=31.76;MQRankSum=0.568;QD=13.19;ReadPosRankSum=0.312;SOR=4.271
chr21	8446922	13700	Terminator	G	C,A	94879.1	SNV	AC=116,1;AF=0.0232,0.0002;AN=5000;BaseQRankSum=0.533;ClippingRankSum=0.000;DP=166652;ExcessHet=3.7290;FS=0.000;InbreedingCoeff=-0.0059;MLEAC=110,1;MLEAF=0.022,0.0002;MQ=34.96;MQRankSum=-0.373;QD=8.16;ReadPosRankSum=0.356;SOR=0.927
chr21	8219689	13701	Terminator	C	T,*	4.68089e+06	SNV	AC=1,698;AF=0.0002,0.139;AN=5008;BaseQRankSum=0.179;ClippingRankSum=0.000;DP=3816030;ExcessHet=252.0414;FS=0.000;InbreedingCoeff=-0.1615;MLEAC=1,700;MLEAF=0.0002,0.14;MQ=1.66;MQRankSum=0.567;QD=3.04;ReadPosRankSum=-0.669;SOR=0.044
chr21	8219690	13702	Terminator	G	A,*	4.67244e+06	SNV	AC=1,698;AF=0.0002,0.139;AN=5008;BaseQRankSum=-0.221;ClippingRankSum=0.000;DP=3835588;ExcessHet=255.4994;FS=0.000;InbreedingCoeff=-0.1604;MLEAC=1,704;MLEAF=0.0002,0.141;MQ=1.45;MQRankSum=0.198;QD=3.04;ReadPosRankSum=1.019;SOR=0.044
chr21	8219692	13704	Terminator	G	C,T,*	4.69269e+06	SNV	AC=1,6,695;AF=0.0002,0.0012,0.139;AN=5008;BaseQRankSum=1.109;ClippingRankSum=0.000;DP=3841966;ExcessHet=254.0171;FS=0.000;InbreedingCoeff=-0.1611;MLEAC=1,6,696;MLEAF=0.0002,0.0012,0.139;MQ=3.68;MQRankSum=2.037;QD=3.04;ReadPosRankSum=0.860;SOR=0.044
chr21	8446926	13704	Terminator	A	G	26356.1	SNV	AC=25;AF=0.005;AN=5002;BaseQRankSum=0.422;ClippingRankSum=0.000;DP=167096;ExcessHet=0.2061;FS=0.000;InbreedingCoeff=0.0450;MLEAC=22;MLEAF=0.0044;MQ=35.50;MQRankSum=-0.004;QD=10.68;ReadPosRankSum=0.166;SOR=0.546
chr21	8219697	13709	Terminator	C	T,*	4.69254e+06	SNV	AC=2,699;AF=0.000399,0.14;AN=5008;BaseQRankSum=-2.475;ClippingRankSum=0.000;DP=3854623;ExcessHet=253.1216;FS=0.000;InbreedingCoeff=-0.1622;MLEAC=2,700;MLEAF=0.000399,0.14;MQ=2.17;MQRankSum=-0.362;QD=3.04;ReadPosRankSum=5.775;SOR=0.044
chr21	8219699	13711	Terminator	T	C,*	4.74366e+06	SNV	AC=80,641;AF=0.016,0.128;AN=5008;BaseQRankSum=1.810;ClippingRankSum=0.000;DP=3902049;ExcessHet=279.8268;FS=0.000;InbreedingCoeff=-0.1645;MLEAC=80,647;MLEAF=0.016,0.129;MQ=13.45;MQRankSum=-7.725;QD=3.01;ReadPosRankSum=1.623;SOR=0.041
chr21	8219700	13712	Terminator	C	T,G,*	4.71289e+06	SNV	AC=68,3,639;AF=0.0136,0.000599,0.128;AN=5008;BaseQRankSum=-0.602;ClippingRankSum=0.000;DP=3891682;ExcessHet=262.9926;FS=0.000;InbreedingCoeff=-0.1605;MLEAC=68,3,642;MLEAF=0.0136,0.000599,0.128;MQ=12.85;MQRankSum=-6.587;QD=3.04;ReadPosRankSum=1.606;SOR=0.042
chr21	8402747	13712	Terminator	ACCGACGCGAGGGCGCTGATTC	A,GCCGACGCGAGGGCGCTGATTC	20960.4	INDEL	AC=21,27;AF=0.00419,0.00539;AN=5008;BaseQRankSum=0.590;ClippingRankSum=0.000;DP=190948;ExcessHet=4.0405;FS=59.757;InbreedingCoeff=-0.0096;MLEAC=19,27;MLEAF=0.00379,0.00539;MQ=30.41;MQRankSum=0.535;QD=4.44;ReadPosRankSum=-0.739;SOR=8.997
chr21	8446935	13713	Terminator	C	T	2210.55	SNV	AC=4;AF=0.0008;AN=5002;BaseQRankSum=0.000;ClippingRankSum=0.000;DP=167357;ExcessHet=3.0190;FS=0.000;InbreedingCoeff=-0.0013;MLEAC=4;MLEAF=0.0008;MQ=35.68;MQRankSum=1.672;QD=5.60;ReadPosRankSum=-0.367;SOR=0.131
chr21	8402749	13714	Terminator	C	T,G,*	28423.7	SNV	AC=62,3,21;AF=0.0124,0.000599,0.00419;AN=5006;BaseQRankSum=0.387;ClippingRankSum=0.000;DP=189899;ExcessHet=6.2629;FS=54.945;InbreedingCoeff=-0.0139;MLEAC=56,2,19;MLEAF=0.0112,0.0004,0.0038;MQ=26.15;MQRankSum=2.448;QD=4.39;ReadPosRankSum=-2.561;SOR=7.545
chr21	8402750	13715	Terminator	G	GTTC,*	4346.2	SNV	AC=4,21;AF=0.000799,0.00419;AN=5008;BaseQRankSum=0.000;ClippingRankSum=0.000;DP=188606;ExcessHet=3.2718;FS=39.907;InbreedingCoeff=-0.0047;MLEAC=4,19;MLEAF=0.000799,0.00379;MQ=11.03;MQRankSum=2.472;QD=2.26;ReadPosRankSum=-2.618;SOR=10.580
chr21	8219704	13716	Terminator	T	G,*	4.68336e+06	SNV	AC=1,699;AF=0.0002,0.14;AN=5008;BaseQRankSum=0.474;ClippingRankSum=0.000;DP=3896570;ExcessHet=255.5611;FS=0.000;InbreedingCoeff=-0.1608;MLEAC=1,704;MLEAF=0.0002,0.141;MQ=1.83;MQRankSum=2.839;QD=3.04;ReadPosRankSum=2.279;SOR=0.044
chr21	8402751	13716	Terminator	A	G,*	4356.64	SNV	AC=4,21;AF=0.000799,0.00419;AN=5008;BaseQRankSum=-2.830;ClippingRankSum=0.000;DP=188353;ExcessHet=3.2721;FS=40.084;InbreedingCoeff=-0.0045;MLEAC=4,19;MLEAF=0.000799,0.00379;MQ=12.83;MQRankSum=1.458;QD=2.27;ReadPosRankSum=-1.948;SOR=10.660
chr21	8219707	13719	Terminator	C	G	116351	SNV	AC=24;AF=0.00479;AN=5008;BaseQRankSum=-5.671;ClippingRankSum=0.000;DP=3589813;ExcessHet=3.2716;FS=0.000;InbreedingCoeff=-0.0049;MLEAC=24;MLEAF=0.00479;MQ=38.94;MQRankSum=-16.122;QD=2.27;ReadPosRankSum=-0.033;SOR=0.018
chr21	8402754	13719	Terminator	C	T,*	4603.72	SNV	AC=3,21;AF=0.000599,0.00419;AN=5008;BaseQRankSum=-0.928;ClippingRankSum=0.000;DP=186863;ExcessHet=3.2513;FS=42.431;InbreedingCoeff=-0.0041;MLEAC=2,19;MLEAF=0.000399,0.00379;MQ=7.89;MQRankSum=-0.478;QD=2.40;ReadPosRankSum=0.385;SOR=10.564
chr21	8446941	13719	Terminator	G	A	1534.69	SNV	AC=10;AF=0.002;AN=5002;BaseQRankSum=0.481;ClippingRankSum=0.000;DP=168158;ExcessHet=3.0781;FS=0.000;InbreedingCoeff=-0.0026;MLEAC=9;MLEAF=0.0018;MQ=33.75;MQRankSum=-0.371;QD=1.40;ReadPosRankSum=1.391;SOR=0.021
chr21	8402755	13720	Terminator	G	C,*	13263	SNV	AC=12,21;AF=0.0024,0.00419;AN=5008;BaseQRankSum=0.000;ClippingRankSum=0.000;DP=186724;ExcessHet=3.4717;FS=60.208;InbreedingCoeff=-0.0061;MLEAC=12,19;MLEAF=0.0024,0.00379;MQ=17.40;MQRankSum=0.307;QD=4.29;ReadPosRankSum=0.379;SOR=7.681
chr21	8219712	13724	Terminator	G	A	136783	SNV	AC=28;AF=0.00559;AN=5008;BaseQRankSum=1.460;ClippingRankSum=0.000;DP=3589274;ExcessHet=3.3399;FS=0.000;InbreedingCoeff=-0.0056;MLEAC=28;MLEAF=0.00559;MQ=38.97;MQRankSum=-16.960;QD=2.30;ReadPosRankSum=0.229;SOR=0.017
chr21	8402760	13725	Terminator	C	T,*	2.0149e+06	SNV	AC=1471,8;AF=0.294,0.0016;AN=5006;BaseQRankSum=-0.579;ClippingRankSum=0.000;DP=183239;ExcessHet=1344.0745;FS=126.599;InbreedingCoeff=-0.4147;MLEAC=1477,7;MLEAF=0.295,0.0014;MQ=27.08;MQRankSum=-0.313;QD=15.56;ReadPosRankSum=0.177;SOR=4.850
chr21	8402761	13726	Terminator	GCTGAT	G,ACTGAT,*	2809.75	INDEL	AC=4,3,9;AF=0.000799,0.000599,0.0018;AN=5008;BaseQRankSum=0.338;ClippingRankSum=0.000;DP=182184;ExcessHet=3.1148;FS=47.419;InbreedingCoeff=-0.0024;MLEAC=4,3,8;MLEAF=0.000799,0.000599,0.0016;MQ=13.35;MQRankSum=0.523;QD=2.80;ReadPosRankSum=-1.253;SOR=9.770
chr21	8402762	13727	Terminator	C	T,*	18448.5	SNV	AC=82,15;AF=0.0164,0.003;AN=5008;BaseQRankSum=-0.000;ClippingRankSum=0.000;DP=181783;ExcessHet=7.2062;FS=34.654;InbreedingCoeff=-0.0162;MLEAC=78,14;MLEAF=0.0156,0.0028;MQ=24.70;MQRankSum=0.350;QD=3.15;ReadPosRankSum=-1.141;SOR=3.997
chr21	8402763	13728	Terminator	T	C,*	3.04975e+06	SNV	AC=2113,3;AF=0.422,0.000599;AN=5006;BaseQRankSum=-0.857;ClippingRankSum=-0.000;DP=177793;ExcessHet=2147483647.0000;FS=192.791;InbreedingCoeff=-0.6944;MLEAC=2135,2;MLEAF=0.426,0.0004;MQ=26.40;MQRankSum=-0.648;QD=19.27;ReadPosRankSum=0.134;SOR=4.726
chr21	8219718	13730	Terminator	C	A	37275.3	SNV	AC=6;AF=0.0012;AN=5008;BaseQRankSum=-5.615;ClippingRankSum=0.000;DP=3596305;ExcessHet=3.0233;FS=0.000;InbreedingCoeff=-0.0012;MLEAC=6;MLEAF=0.0012;MQ=39.29;MQRankSum=0.896;QD=2.77;ReadPosRankSum=-0.362;SOR=0.043
chr21	8219719	13731	Terminator	C	G	112166	SNV	AC=25;AF=0.00499;AN=5008;BaseQRankSum=-8.246;ClippingRankSum=0.000;DP=3594259;ExcessHet=3.2717;FS=0.000;InbreedingCoeff=-0.0050;MLEAC=25;MLEAF=0.00499;MQ=38.94;MQRankSum=-17.674;QD=2.17;ReadPosRankSum=0.669;SOR=0.017
chr21	8402766	13731	Terminator	T	A,*	12489.7	SNV	AC=15,13;AF=0.003,0.0026;AN=5008;BaseQRankSum=-2.565;ClippingRankSum=0.000;DP=152409;ExcessHet=3.3404;FS=62.466;InbreedingCoeff=-0.0052;MLEAC=14,12;MLEAF=0.0028,0.0024;MQ=21.62;MQRankSum=-0.359;QD=4.67;ReadPosRankSum=0.429;SOR=9.026
chr21	8446954	13732	Terminator	ACCGACGCGAGGGCGTCGATTC	A	110414	INDEL	AC=109;AF=0.0218;AN=4998;BaseQRankSum=0.000;ClippingRankSum=0.000;DP=174108;ExcessHet=8.8307;FS=0.000;InbreedingCoeff=-0.0189;MLEAC=109;MLEAF=0.0218;MQ=35.97;MQRankSum=0.959;QD=11.19;ReadPosRankSum=-0.638;SOR=1.493
chr21	8219721	13733	Terminator	C	T,A	375103	SNV	AC=2,63;AF=0.000399,0.0126;AN=5008;BaseQRankSum=-2.843;ClippingRankSum=0.000;DP=3642096;ExcessHet=4.8391;FS=0.000;InbreedingCoeff=-0.0130;MLEAC=2,63;MLEAF=0.000399,0.0126;MQ=39.20;MQRankSum=-0.456;QD=2.84;ReadPosRankSum=0.447;SOR=0.042
chr21	8402768	13733	Terminator	C	T,*	2561.62	SNV	AC=2,11;AF=0.000399,0.0022;AN=5008;BaseQRankSum=0.000;ClippingRankSum=0.000;DP=151602;ExcessHet=3.0781;FS=39.987;InbreedingCoeff=-0.0024;MLEAC=1,10;MLEAF=0.0002,0.002;MQ=9.08;MQRankSum=0.929;QD=2.56;ReadPosRankSum=0.638;SOR=5.131
chr21	8446956	13734	Terminator	C	T,*	111106	SNV	AC=1,109;AF=0.0002,0.0218;AN=4998;BaseQRankSum=0.667;ClippingRankSum=0.000;DP=174404;ExcessHet=8.3608;FS=0.000;InbreedingCoeff=-0.0163;MLEAC=1,108;MLEAF=0.0002,0.0216;MQ=5.56;MQRankSum=-0.120;QD=11.14;ReadPosRankSum=0.295;SOR=1.464
chr21	8446959	13737	Terminator	C	T,*	110565	SNV	AC=1,109;AF=0.0002,0.0218;AN=4998;BaseQRankSum=0.437;ClippingRankSum=0.000;DP=175251;ExcessHet=8.3718;FS=0.000;InbreedingCoeff=-0.0161;MLEAC=1,108;MLEAF=0.0002,0.0216;MQ=5.32;MQRankSum=2.051;QD=11.10;ReadPosRankSum=1.093;SOR=1.458
chr21	8402773	13738	Terminator	T	C,A	335.53	SNV	AC=2,3;AF=0.000399,0.000599;AN=5008;BaseQRankSum=0.428;ClippingRankSum=0.000;DP=151303;ExcessHet=3.0190;FS=8.320;InbreedingCoeff=-0.0010;MLEAC=2,3;MLEAF=0.000399,0.000599;MQ=25.21;MQRankSum=0.445;QD=1.94;ReadPosRankSum=0.443;SOR=1.503
chr21	8402775	13740	Terminator	A	G	260710	SNV	AC=638;AF=0.127;AN=5008;BaseQRankSum=0.421;ClippingRankSum=0.000;DP=150953;ExcessHet=215.8136;FS=24.346;InbreedingCoeff=-0.1499;MLEAC=631;MLEAF=0.126;MQ=25.08;MQRankSum=-0.495;QD=5.90;ReadPosRankSum=0.164;SOR=2.165
chr21	8446962	13740	Terminator	G	C,*	113083	SNV	AC=6,109;AF=0.0012,0.0218;AN=4998;BaseQRankSum=0.708;ClippingRankSum=0.000;DP=175893;ExcessHet=8.8691;FS=0.000;InbreedingCoeff=-0.0174;MLEAC=6,108;MLEAF=0.0012,0.0216;MQ=9.52;MQRankSum=-0.260;QD=10.54;ReadPosRankSum=0.098;SOR=1.415
chr21	8402776	13741	Terminator	C	T	751.85	SNV	AC=8;AF=0.0016;AN=5008;BaseQRankSum=0.365;ClippingRankSum=0.000;DP=136146;ExcessHet=3.0416;FS=26.621;InbreedingCoeff=-0.0018;MLEAC=8;MLEAF=0.0016;MQ=24.89;MQRankSum=2.068;QD=1.37;ReadPosRankSum=-0.465;SOR=1.956
chr21	8446964	13742	Terminator	G	C,*	111230	SNV	AC=3,109;AF=0.0006,0.0218;AN=4998;BaseQRankSum=0.391;ClippingRankSum=0.000;DP=176000;ExcessHet=8.5763;FS=0.000;InbreedingCoeff=-0.0163;MLEAC=3,109;MLEAF=0.0006,0.0218;MQ=5.37;MQRankSum=-0.854;QD=10.98;ReadPosRankSum=0.741;SOR=1.466
chr21	8446965	13743	Terminator	G	T,*	111134	SNV	AC=2,109;AF=0.0004,0.0218;AN=4998;BaseQRankSum=0.912;ClippingRankSum=0.000;DP=176039;ExcessHet=8.4579;FS=0.000;InbreedingCoeff=-0.0166;MLEAC=2,108;MLEAF=0.0004,0.0216;MQ=3.98;MQRankSum=0.453;QD=11.10;ReadPosRankSum=1.143;SOR=1.480
chr21	8402779	13744	Terminator	G	T	1781.52	SNV	AC=5;AF=0.000998;AN=5008;BaseQRankSum=0.000;ClippingRankSum=0.000;DP=136128;ExcessHet=3.0190;FS=50.401;InbreedingCoeff=-0.0012;MLEAC=5;MLEAF=0.000998;MQ=25.08;MQRankSum=-0.774;QD=6.65;ReadPosRankSum=0.093;SOR=4.267
chr21	8446966	13744	Terminator	G	A,*	111599	SNV	AC=2,109;AF=0.0004,0.0218;AN=4998;BaseQRankSum=0.000;ClippingRankSum=0.000;DP=176038;ExcessHet=8.4848;FS=0.000;InbreedingCoeff=-0.0160;MLEAC=2,108;MLEAF=0.0004,0.0216;MQ=3.07;MQRankSum=-0.253;QD=11.23;ReadPosRankSum=-0.875;SOR=1.503
chr21	8446967	13745	Terminator	C	T,*	174127	SNV	AC=74,104;AF=0.0148,0.0208;AN=5000;BaseQRankSum=0.000;ClippingRankSum=0.000;DP=179660;ExcessHet=17.3487;FS=0.000;InbreedingCoeff=-0.0315;MLEAC=73,104;MLEAF=0.0146,0.0208;MQ=23.64;MQRankSum=-0.937;QD=10.03;ReadPosRankSum=-0.401;SOR=1.716
chr21	8402782	13747	Terminator	C	T,G	17407.9	SNV	AC=41,3;AF=0.00819,0.000599;AN=5008;BaseQRankSum=-0.799;ClippingRankSum=0.000;DP=135940;ExcessHet=3.8385;FS=92.280;InbreedingCoeff=-0.0087;MLEAC=39,3;MLEAF=0.00779,0.000599;MQ=24.98;MQRankSum=-0.669;QD=3.77;ReadPosRankSum=0.090;SOR=7.997
chr21	8446969	13747	Terminator	T	C,*	196762	SNV	AC=125,103;AF=0.025,0.0206;AN=5000;BaseQRankSum=0.490;ClippingRankSum=0.000;DP=181501;ExcessHet=27.2282;FS=0.000;InbreedingCoeff=-0.0408;MLEAC=126,103;MLEAF=0.0252,0.0206;MQ=26.83;MQRankSum=-1.546;QD=8.97;ReadPosRankSum=0.007;SOR=1.803
chr21	8446970	13748	Terminator	C	T,*	115991	SNV	AC=10,103;AF=0.002,0.0206;AN=4998;BaseQRankSum=0.000;ClippingRankSum=0.000;DP=179368;ExcessHet=8.7107;FS=0.000;InbreedingCoeff=-0.0160;MLEAC=10,103;MLEAF=0.002,0.0206;MQ=10.54;MQRankSum=-0.439;QD=11.50;ReadPosRankSum=-1.300;SOR=1.589
chr21	8446975	13753	Terminator	C	G,*	112582	SNV	AC=2,106;AF=0.0004,0.0212;AN=5004;BaseQRankSum=0.000;ClippingRankSum=0.000;DP=179757;ExcessHet=8.1841;FS=0.000;InbreedingCoeff=-0.0150;MLEAC=2,105;MLEAF=0.0004,0.021;MQ=4.13;MQRankSum=-0.129;QD=11.64;ReadPosRankSum=0.402;SOR=1.566
chr21	8402791	13756	Terminator	C	T	3986.93	SNV	AC=14;AF=0.0028;AN=5008;BaseQRankSum=-1.140;ClippingRankSum=0.000;DP=135294;ExcessHet=3.1016;FS=118.121;InbreedingCoeff=-0.0029;MLEAC=13;MLEAF=0.0026;MQ=25.09;MQRankSum=-0.519;QD=4.48;ReadPosRankSum=-0.214;SOR=7.576
chr21	8219745	13757	Terminator	G	C	124846	SNV	AC=18;AF=0.00359;AN=5008;BaseQRankSum=3.598;ClippingRankSum=0.000;DP=3636771;ExcessHet=3.1929;FS=0.000;InbreedingCoeff=-0.0039;MLEAC=18;MLEAF=0.00359;MQ=39.14;MQRankSum=-2.363;QD=3.04;ReadPosRankSum=0.098;SOR=0.039
chr21	8446979	13757	Terminator	T	C	32943.2	SNV	AC=45;AF=0.00899;AN=5008;BaseQRankSum=1.277;ClippingRankSum=-0.000;DP=180911;ExcessHet=4.0815;FS=0.000;InbreedingCoeff=-0.0098;MLEAC=45;MLEAF=0.00899;MQ=35.76;MQRankSum=1.317;QD=4.51;ReadPosRankSum=0.988;SOR=0.525
chr21	8446980	13758	Terminator	T	C	5433.53	SNV	AC=3;AF=0.000599;AN=5008;BaseQRankSum=2.162;ClippingRankSum=0.000;DP=179230;ExcessHet=3.0155;FS=0.000;InbreedingCoeff=0.0067;MLEAC=3;MLEAF=0.000599;MQ=37.01;MQRankSum=2.818;QD=5.93;ReadPosRankSum=1.074;SOR=0.112
chr21	8446982	13760	Terminator	G	A	5094.39	SNV	AC=32;AF=0.00639;AN=5008;BaseQRankSum=0.488;ClippingRankSum=0.000;DP=179089;ExcessHet=3.5292;FS=0.000;InbreedingCoeff=-0.0061;MLEAC=29;MLEAF=0.00579;MQ=33.92;MQRankSum=-2.380;QD=2.22;ReadPosRankSum=1.316;SOR=0.016
chr21	8219749	13761	Terminator	G	C	15452.5	SNV	AC=3;AF=0.000599;AN=5008;BaseQRankSum=1.852;ClippingRankSum=0.000;DP=3634857;ExcessHet=3.0129;FS=0.000;InbreedingCoeff=-0.0006;MLEAC=3;MLEAF=0.000599;MQ=38.87;MQRankSum=-6.211;QD=2.74;ReadPosRankSum=-0.049;SOR=0.016
chr21	8402796	13761	Terminator	G	A	544.65	SNV	AC=9;AF=0.0018;AN=5008;BaseQRankSum=0.328;ClippingRankSum=0.000;DP=135233;ExcessHet=3.0416;FS=26.249;InbreedingCoeff=-0.0020;MLEAC=8;MLEAF=0.0016;MQ=25.19;MQRankSum=0.535;QD=1.67;ReadPosRankSum=0.229;SOR=4.253
chr21	8446984	13762	Terminator	G	C	11359.2	SNV	AC=25;AF=0.00499;AN=5008;BaseQRankSum=0.702;ClippingRankSum=0.000;DP=179196;ExcessHet=3.3395;FS=0.000;InbreedingCoeff=-0.0056;MLEAC=23;MLEAF=0.00459;MQ=35.91;MQRankSum=0.850;QD=5.00;ReadPosRankSum=0.167;SOR=0.082
chr21	8219752	13764	Terminator	C	A,G	87829.9	SNV	AC=1,18;AF=0.0002,0.00359;AN=5008;BaseQRankSum=-1.574;ClippingRankSum=0.000;DP=3644729;ExcessHet=3.1591;FS=0.000;InbreedingCoeff=-0.0038;MLEAC=1,18;MLEAF=0.0002,0.00359;MQ=39.07;MQRankSum=1.458;QD=2.49;ReadPosRankSum=-3.290;SOR=0.020
chr21	8219753	13765	Terminator	T	TCGC,C	85280.9	INDEL	AC=17,2;AF=0.00339,0.000399;AN=5008;BaseQRankSum=-4.943;ClippingRankSum=0.000;DP=3646276;ExcessHet=3.1591;FS=0.000;InbreedingCoeff=-0.0038;MLEAC=17,2;MLEAF=0.00339,0.000399;MQ=39.17;MQRankSum=1.677;QD=2.43;ReadPosRankSum=-3.264;SOR=0.021
chr21	8446988	13766	Terminator	C	A	5486.28	SNV	AC=24;AF=0.00479;AN=5008;BaseQRankSum=-0.000;ClippingRankSum=0.000;DP=179093;ExcessHet=3.3394;FS=0.000;InbreedingCoeff=-0.0057;MLEAC=23;MLEAF=0.00459;MQ=34.66;MQRankSum=-2.358;QD=4.04;ReadPosRankSum=-0.314;SOR=0.096
chr21	8219755	13767	Terminator	G	C	41131.2	SNV	AC=16;AF=0.00319;AN=5008;BaseQRankSum=1.258;ClippingRankSum=0.000;DP=3654351;ExcessHet=3.1286;FS=0.000;InbreedingCoeff=-0.0033;MLEAC=16;MLEAF=0.00319;MQ=38.88;MQRankSum=-2.976;QD=1.51;ReadPosRankSum=0.624;SOR=0.183
chr21	8446989	13767	Terminator	C	A,T,G	4973	SNV	AC=1,1,6;AF=0.0002,0.0002,0.0012;AN=5008;BaseQRankSum=-1.478;ClippingRankSum=0.000;DP=179089;ExcessHet=3.0347;FS=0.000;InbreedingCoeff=-0.0005;MLEAC=1,1,6;MLEAF=0.0002,0.0002,0.0012;MQ=36.33;MQRankSum=0.742;QD=5.46;ReadPosRankSum=-0.672;SOR=0.116
chr21	8219756	13768	Terminator	GA	G	63910.4	SNV	AC=17;AF=0.00339;AN=5008;BaseQRankSum=0.151;ClippingRankSum=0.000;DP=3651409;ExcessHet=3.1286;FS=0.000;InbreedingCoeff=-0.0034;MLEAC=17;MLEAF=0.00339;MQ=39.12;MQRankSum=1.346;QD=2.08;ReadPosRankSum=-3.319;SOR=0.016
chr21	8446991	13769	Terminator	C	T,A	36369.1	SNV	AC=48,3;AF=0.00958,0.000599;AN=5008;BaseQRankSum=0.000;ClippingRankSum=0.000;DP=180273;ExcessHet=4.1309;FS=0.000;InbreedingCoeff=-0.0095;MLEAC=47,3;MLEAF=0.00938,0.000599;MQ=35.71;MQRankSum=-0.138;QD=7.15;ReadPosRankSum=0.438;SOR=0.571
chr21	8402808	13773	Terminator	C	G	80084.6	SNV	AC=418;AF=0.0835;AN=5006;BaseQRankSum=0.334;ClippingRankSum=0.000;DP=137553;ExcessHet=113.1293;FS=3.699;InbreedingCoeff=-0.1001;MLEAC=408;MLEAF=0.0815;MQ=25.05;MQRankSum=-2.133;QD=2.92;ReadPosRankSum=0.635;SOR=1.066
chr21	8402812	13777	Terminator	G	C,T	6262.72	SNV	AC=19,1;AF=0.00379,0.0002;AN=5008;BaseQRankSum=0.000;ClippingRankSum=0.000;DP=129221;ExcessHet=3.1759;FS=156.079;InbreedingCoeff=-0.0038;MLEAC=18,1;MLEAF=0.00359,0.0002;MQ=25.28;MQRankSum=-0.037;QD=4.92;ReadPosRankSum=-0.704;SOR=7.486
chr21	8219776	13788	Terminator	C	G	565444	SNV	AC=115;AF=0.023;AN=5008;BaseQRankSum=0.391;ClippingRankSum=0.000;DP=3751995;ExcessHet=9.4463;FS=0.000;InbreedingCoeff=-0.0241;MLEAC=115;MLEAF=0.023;MQ=40.04;MQRankSum=3.005;QD=2.48;ReadPosRankSum=-0.140;SOR=0.540
chr21	8219777	13789	Terminator	T	C,G	1.93751e+07	SNV	AC=1270,750;AF=0.254,0.15;AN=5008;BaseQRankSum=3.599;ClippingRankSum=0.000;DP=5303705;ExcessHet=2147483647.0000;FS=3.189;InbreedingCoeff=-0.6978;MLEAC=1290,760;MLEAF=0.258,0.152;MQ=40.09;MQRankSum=-5.380;QD=4.55;ReadPosRankSum=0.971;SOR=1.248
chr21	8219778	13790	Terminator	C	T	71557.4	SNV	AC=22;AF=0.00439;AN=5008;BaseQRankSum=-5.311;ClippingRankSum=0.000;DP=5466212;ExcessHet=3.2115;FS=0.000;InbreedingCoeff=-0.0044;MLEAC=20;MLEAF=0.00399;MQ=37.60;MQRankSum=-7.873;QD=1.76;ReadPosRankSum=-2.859;SOR=0.874
chr21	8447015	13793	Terminator	G	C	42080.5	SNV	AC=171;AF=0.0341;AN=5008;BaseQRankSum=0.748;ClippingRankSum=0.000;DP=180936;ExcessHet=17.4498;FS=0.000;InbreedingCoeff=-0.0366;MLEAC=162;MLEAF=0.0323;MQ=34.94;MQRankSum=-2.262;QD=3.02;ReadPosRankSum=1.147;SOR=0.309
chr21	8219783	13795	Terminator	T	C,*	39739.8	SNV	AC=6,1;AF=0.0012,0.0002;AN=5008;BaseQRankSum=-0.213;ClippingRankSum=0.000;DP=5467803;ExcessHet=3.0285;FS=1.886;InbreedingCoeff=-0.0014;MLEAC=6,1;MLEAF=0.0012,0.0002;MQ=38.83;MQRankSum=4.000;QD=2.89;ReadPosRankSum=-0.942;SOR=0.475
chr21	8447022	13800	Terminator	C	G	14151.4	SNV	AC=44;AF=0.00879;AN=5008;BaseQRankSum=0.000;ClippingRankSum=0.000;DP=178401;ExcessHet=3.9554;FS=0.000;InbreedingCoeff=-0.0096;MLEAC=41;MLEAF=0.00819;MQ=35.56;MQRankSum=0.755;QD=3.69;ReadPosRankSum=-0.856;SOR=0.318
chr21	8402836	13801	Terminator	T	C	105646	SNV	AC=480;AF=0.0959;AN=5006;BaseQRankSum=0.429;ClippingRankSum=0.000;DP=126876;ExcessHet=135.3901;FS=0.734;InbreedingCoeff=-0.1130;MLEAC=466;MLEAF=0.0931;MQ=24.94;MQRankSum=-1.757;QD=3.67;ReadPosRankSum=-0.205;SOR=0.874
chr21	8447025	13803	Terminator	G	C,T	21360.5	SNV	AC=48,1;AF=0.00958,0.0002;AN=5008;BaseQRankSum=0.454;ClippingRankSum=0.000;DP=177668;ExcessHet=4.0409;FS=0.000;InbreedingCoeff=-0.0094;MLEAC=47,1;MLEAF=0.00938,0.0002;MQ=35.49;MQRankSum=0.114;QD=4.26;ReadPosRankSum=-0.640;SOR=0.999
chr21	8402841	13806	Terminator	T	C	366.03	SNV	AC=22;AF=0.00439;AN=5008;BaseQRankSum=0.530;ClippingRankSum=0.000;DP=115403;ExcessHet=3.7938;FS=3.803;InbreedingCoeff=-0.0067;MLEAC=14;MLEAF=0.0028;MQ=24.74;MQRankSum=-1.091;QD=0.53;ReadPosRankSum=-0.738;SOR=0.332
chr21	8219798	13810	Terminator	C	T	13779.8	SNV	AC=8;AF=0.0016;AN=5008;BaseQRankSum=-1.285;ClippingRankSum=0.000;DP=5471953;ExcessHet=3.0346;FS=0.000;InbreedingCoeff=-0.0016;MLEAC=8;MLEAF=0.0016;MQ=41.10;MQRankSum=-8.833;QD=1.11;ReadPosRankSum=-5.243;SOR=0.678
chr21	8219800	13812	Terminator	C	A	28621.8	SNV	AC=7;AF=0.0014;AN=5008;BaseQRankSum=0.241;ClippingRankSum=0.000;DP=5477299;ExcessHet=3.0494;FS=6.309;InbreedingCoeff=-0.0017;MLEAC=7;MLEAF=0.0014;MQ=41.52;MQRankSum=-2.291;QD=1.25;ReadPosRankSum=1.835;SOR=1.626
chr21	8219801	13813	Terminator	G	C	17717.3	SNV	AC=6;AF=0.0012;AN=5008;BaseQRankSum=0.169;ClippingRankSum=0.000;DP=5481917;ExcessHet=3.0285;FS=1.874;InbreedingCoeff=-0.0013;MLEAC=6;MLEAF=0.0012;MQ=42.70;MQRankSum=1.651;QD=0.95;ReadPosRankSum=1.668;SOR=0.525
chr21	8402852	13817	Terminator	C	G	1198.47	SNV	AC=3;AF=0.000599;AN=5008;BaseQRankSum=0.442;ClippingRankSum=0.000;DP=112980;ExcessHet=3.0129;FS=16.540;InbreedingCoeff=-0.0007;MLEAC=3;MLEAF=0.000599;MQ=24.91;MQRankSum=-1.719;QD=6.93;ReadPosRankSum=-0.289;SOR=0.353
chr21	8402853	13818	Terminator	A	G	2316.66	SNV	AC=13;AF=0.0026;AN=5008;BaseQRankSum=0.624;ClippingRankSum=0.000;DP=112694;ExcessHet=3.1015;FS=99.179;InbreedingCoeff=-0.0028;MLEAC=13;MLEAF=0.0026;MQ=24.73;MQRankSum=0.281;QD=2.75;ReadPosRankSum=-0.847;SOR=7.636
chr21	8219809	13821	Terminator	G	T	23922.8	SNV	AC=7;AF=0.0014;AN=5008;BaseQRankSum=-6.758;ClippingRankSum=0.000;DP=5487208;ExcessHet=3.0346;FS=7.938;InbreedingCoeff=-0.0015;MLEAC=7;MLEAF=0.0014;MQ=44.42;MQRankSum=1.993;QD=1.80;ReadPosRankSum=-0.291;SOR=0.539
chr21	8447043	13821	Terminator	T	C	15889.9	SNV	AC=28;AF=0.00559;AN=5008;BaseQRankSum=0.739;ClippingRankSum=0.000;DP=175267;ExcessHet=4.1179;FS=4.337;InbreedingCoeff=-0.0095;MLEAC=28;MLEAF=0.00559;MQ=35.04;MQRankSum=0.349;QD=6.09;ReadPosRankSum=-0.121;SOR=5.872
chr21	8219812	13824	Terminator	C	T	932194	SNV	AC=138;AF=0.0276;AN=5008;BaseQRankSum=1.342;ClippingRankSum=0.000;DP=5597266;ExcessHet=12.9519;FS=1.585;InbreedingCoeff=-0.0296;MLEAC=137;MLEAF=0.0274;MQ=43.96;MQRankSum=0.885;QD=2.37;ReadPosRankSum=0.964;SOR=0.516
chr21	8447046	13824	Terminator	CTCA	GTCA,C,TTCA	2029.82	SNV	AC=19,1,1;AF=0.00379,0.0002,0.0002;AN=5008;BaseQRankSum=0.335;ClippingRankSum=0.000;DP=175770;ExcessHet=3.1942;FS=4.352;InbreedingCoeff=-0.0004;MLEAC=17,1,1;MLEAF=0.00339,0.0002,0.0002;MQ=35.50;MQRankSum=0.382;QD=2.44;ReadPosRankSum=0.310;SOR=0.065
chr21	8447047	13825	Terminator	T	C,G	2.45051e+06	SNV	AC=2116,225;AF=0.424,0.0451;AN=4988;BaseQRankSum=1.034;ClippingRankSum=0.000;DP=225087;ExcessHet=1053.8534;FS=27.936;InbreedingCoeff=-0.4041;MLEAC=2137,220;MLEAF=0.428,0.0441;MQ=35.25;MQRankSum=-0.978;QD=13.53;ReadPosRankSum=0.418;SOR=5.300
chr21	8402861	13826	Terminator	C	T	329657	SNV	AC=1065;AF=0.213;AN=5004;BaseQRankSum=-0.484;ClippingRankSum=0.000;DP=109055;ExcessHet=774.0376;FS=100.949;InbreedingCoeff=-0.2980;MLEAC=1097;MLEAF=0.219;MQ=24.79;MQRankSum=-0.707;QD=6.32;ReadPosRankSum=-0.877;SOR=2.438
chr21	8447048	13826	Terminator	C	T	310355	SNV	AC=402;AF=0.0806;AN=4990;BaseQRankSum=-1.924;ClippingRankSum=0.000;DP=214502;ExcessHet=73.8345;FS=1.387;InbreedingCoeff=-0.0872;MLEAC=401;MLEAF=0.0804;MQ=35.25;MQRankSum=0.440;QD=8.68;ReadPosRankSum=-0.833;SOR=1.518
chr21	8447049	13827	Terminator	A	C	3708.74	SNV	AC=15;AF=0.003;AN=5006;BaseQRankSum=-3.079;ClippingRankSum=0.000;DP=213088;ExcessHet=0.2052;FS=7.383;InbreedingCoeff=0.0605;MLEAC=5;MLEAF=0.000999;MQ=8.56;MQRankSum=1.311;QD=7.43;ReadPosRankSum=0.873;SOR=1.838
chr21	8219823	13835	Terminator	T	G	56562.5	SNV	AC=10;AF=0.002;AN=5008;BaseQRankSum=-1.091;ClippingRankSum=0.000;DP=5616182;ExcessHet=3.1014;FS=0.744;InbreedingCoeff=-0.0025;MLEAC=10;MLEAF=0.002;MQ=44.82;MQRankSum=0.999;QD=2.27;ReadPosRankSum=1.577;SOR=0.575
chr21	8219825	13837	Terminator	A	G	361400	SNV	AC=86;AF=0.0172;AN=5008;BaseQRankSum=1.761;ClippingRankSum=0.000;DP=5689269;ExcessHet=7.2792;FS=0.776;InbreedingCoeff=-0.0190;MLEAC=86;MLEAF=0.0172;MQ=45.06;MQRankSum=-6.970;QD=1.56;ReadPosRankSum=2.442;SOR=0.792
chr21	8219827	13839	Terminator	A	C	74980.4	SNV	AC=17;AF=0.00339;AN=5008;BaseQRankSum=-3.259;ClippingRankSum=0.000;DP=5726373;ExcessHet=3.1929;FS=4.728;InbreedingCoeff=-0.0037;MLEAC=16;MLEAF=0.00319;MQ=46.31;MQRankSum=6.293;QD=1.89;ReadPosRankSum=0.599;SOR=0.621
chr21	8219830	13842	Terminator	G	C	17499.5	SNV	AC=3;AF=0.000599;AN=5008;BaseQRankSum=-1.890;ClippingRankSum=0.000;DP=5737245;ExcessHet=3.0129;FS=1.557;InbreedingCoeff=-0.0006;MLEAC=3;MLEAF=0.000599;MQ=47.08;MQRankSum=4.067;QD=2.48;ReadPosRankSum=0.224;SOR=0.508
chr21	8402881	13846	Terminator	A	C	225.75	SNV	AC=3;AF=0.000599;AN=5008;BaseQRankSum=-3.153;ClippingRankSum=0.000;DP=85545;ExcessHet=3.1746;FS=67.552;InbreedingCoeff=-0.0029;MLEAC=3;MLEAF=0.000599;MQ=24.73;MQRankSum=-0.184;QD=1.79;ReadPosRankSum=-0.330;SOR=2.496
chr21	8447068	13846	Terminator	C	T	289233	SNV	AC=217;AF=0.0433;AN=5008;BaseQRankSum=-0.963;ClippingRankSum=0.000;DP=216735;ExcessHet=0.0200;FS=1.028;InbreedingCoeff=0.0597;MLEAC=213;MLEAF=0.0425;MQ=35.81;MQRankSum=1.291;QD=13.12;ReadPosRankSum=0.165;SOR=1.052
chr21	8447072	13850	Terminator	A	T	1075.45	SNV	AC=7;AF=0.0014;AN=4996;BaseQRankSum=-3.807;ClippingRankSum=0.000;DP=249481;ExcessHet=519.5486;FS=102.525;InbreedingCoeff=-0.1490;MLEAC=5;MLEAF=0.001;MQ=32.76;MQRankSum=-0.795;QD=3.54;ReadPosRankSum=-1.302;SOR=4.661
chr21	8402892	13857	Terminator	G	C	1903.51	SNV	AC=29;AF=0.00579;AN=5008;BaseQRankSum=0.361;ClippingRankSum=0.000;DP=80077;ExcessHet=3.6891;FS=33.620;InbreedingCoeff=-0.0076;MLEAC=24;MLEAF=0.00479;MQ=24.49;MQRankSum=-0.196;QD=1.83;ReadPosRankSum=0.293;SOR=6.542
chr21	8447079	13857	Terminator	G	T	11890.7	SNV	AC=20;AF=0.00399;AN=5008;BaseQRankSum=0.073;ClippingRankSum=0.000;DP=269544;ExcessHet=3.2307;FS=47.259;InbreedingCoeff=-0.0049;MLEAC=20;MLEAF=0.00399;MQ=35.92;MQRankSum=1.588;QD=7.51;ReadPosRankSum=1.872;SOR=8.085
chr21	8447082	13860	Terminator	C	T	13700.6	SNV	AC=22;AF=0.00439;AN=5006;BaseQRankSum=0.543;ClippingRankSum=-0.000;DP=267900;ExcessHet=4.1174;FS=17.460;InbreedingCoeff=-0.0088;MLEAC=19;MLEAF=0.0038;MQ=34.96;MQRankSum=0.890;QD=8.67;ReadPosRankSum=1.183;SOR=2.144
chr21	8447085	13863	Terminator	G	C	2544.26	SNV	AC=5;AF=0.000998;AN=5008;BaseQRankSum=-0.435;ClippingRankSum=0.000;DP=312870;ExcessHet=3.0346;FS=4.606;InbreedingCoeff=-0.0018;MLEAC=3;MLEAF=0.000599;MQ=33.70;MQRankSum=-0.253;QD=5.03;ReadPosRankSum=1.083;SOR=1.205
chr21	8219853	13865	Terminator	T	TA,C	70686.4	SNV	AC=9,1;AF=0.0018,0.0002;AN=5008;BaseQRankSum=-0.502;ClippingRankSum=0.000;DP=5752865;ExcessHet=3.0494;FS=0.720;InbreedingCoeff=-0.0019;MLEAC=9,1;MLEAF=0.0018,0.0002;MQ=47.38;MQRankSum=0.556;QD=2.82;ReadPosRankSum=1.886;SOR=0.796
chr21	8219855	13867	Terminator	A	C	92747.1	SNV	AC=19;AF=0.00379;AN=5008;BaseQRankSum=0.313;ClippingRankSum=0.000;DP=5775272;ExcessHet=3.2503;FS=3.566;InbreedingCoeff=-0.0043;MLEAC=19;MLEAF=0.00379;MQ=48.70;MQRankSum=3.963;QD=2.16;ReadPosRankSum=0.566;SOR=1.021
chr21	8402905	13870	Terminator	C	G	570.42	SNV	AC=10;AF=0.002;AN=5008;BaseQRankSum=0.000;ClippingRankSum=0.000;DP=67006;ExcessHet=3.2106;FS=34.047;InbreedingCoeff=-0.0042;MLEAC=8;MLEAF=0.0016;MQ=24.84;MQRankSum=0.089;QD=2.56;ReadPosRankSum=0.486;SOR=3.882
chr21	8219859	13871	Terminator	T	C,TTCC	66012.5	SNV	AC=4,1;AF=0.000799,0.0002;AN=5008;BaseQRankSum=4.160;ClippingRankSum=0.000;DP=5791064;ExcessHet=3.0190;FS=0.628;InbreedingCoeff=-0.0009;MLEAC=4,1;MLEAF=0.000799,0.0002;MQ=50.13;MQRankSum=-1.725;QD=5.13;ReadPosRankSum=0.537;SOR=0.633
chr21	8447095	13873	Terminator	A	G	228.21	SNV	AC=3;AF=0.000599;AN=5006;BaseQRankSum=0.624;ClippingRankSum=0.000;DP=314506;ExcessHet=20.5138;FS=36.973;InbreedingCoeff=-0.0252;MLEAC=3;MLEAF=0.000599;MQ=33.62;MQRankSum=0.480;QD=1.72;ReadPosRankSum=0.943;SOR=4.541
chr21	8447096	13874	Terminator	G	A,C	44492.7	SNV	AC=17,2;AF=0.0034,0.0004;AN=5006;BaseQRankSum=-0.650;ClippingRankSum=0.000;DP=312393;ExcessHet=3.1700;FS=9.385;InbreedingCoeff=0.0087;MLEAC=17,2;MLEAF=0.0034,0.0004;MQ=33.95;MQRankSum=0.311;QD=13.25;ReadPosRankSum=1.011;SOR=0.325
chr21	8447101	13879	Terminator	A	T	901.81	SNV	AC=8;AF=0.0016;AN=5004;BaseQRankSum=-3.316;ClippingRankSum=0.000;DP=315306;ExcessHet=1017.2288;FS=60.621;InbreedingCoeff=-0.2236;MLEAC=8;MLEAF=0.0016;MQ=33.04;MQRankSum=-0.304;QD=1.80;ReadPosRankSum=0.690;SOR=9.098
chr21	8402915	13880	Terminator	G	C	427.53	SNV	AC=3;AF=0.000599;AN=5006;BaseQRankSum=0.553;ClippingRankSum=0.000;DP=59434;ExcessHet=7.5747;FS=2.745;InbreedingCoeff=-0.0153;MLEAC=2;MLEAF=0.0004;MQ=24.56;MQRankSum=-0.143;QD=6.48;ReadPosRankSum=0.820;SOR=0.996
chr21	8447102	13880	Terminator	G	C	5893.53	SNV	AC=16;AF=0.0032;AN=5002;BaseQRankSum=-0.055;ClippingRankSum=0.000;DP=292555;ExcessHet=11.5590;FS=22.157;InbreedingCoeff=-0.0190;MLEAC=15;MLEAF=0.003;MQ=32.06;MQRankSum=-0.460;QD=6.26;ReadPosRankSum=-1.783;SOR=1.220
chr21	8402918	13883	Terminator	A	C	36081.2	SNV	AC=522;AF=0.104;AN=5006;BaseQRankSum=0.489;ClippingRankSum=0.000;DP=55318;ExcessHet=264.1643;FS=43.666;InbreedingCoeff=-0.1562;MLEAC=567;MLEAF=0.113;MQ=24.72;MQRankSum=0.704;QD=3.26;ReadPosRankSum=0.159;SOR=5.614
chr21	8219872	13884	Terminator	GC	AC,G	73165.3	INDEL	AC=14,1;AF=0.0028,0.0002;AN=5008;BaseQRankSum=-3.628;ClippingRankSum=0.000;DP=5814010;ExcessHet=3.1017;FS=1.753;InbreedingCoeff=-0.0029;MLEAC=14,1;MLEAF=0.0028,0.0002;MQ=50.89;MQRankSum=4.133;QD=1.61;ReadPosRankSum=1.748;SOR=0.923
chr21	8219873	13885	Terminator	C	T,*	109917	SNV	AC=13,1;AF=0.0026,0.0002;AN=5008;BaseQRankSum=5.405;ClippingRankSum=0.000;DP=5848151;ExcessHet=3.0895;FS=0.754;InbreedingCoeff=-0.0026;MLEAC=13,1;MLEAF=0.0026,0.0002;MQ=49.39;MQRankSum=6.450;QD=2.53;ReadPosRankSum=1.628;SOR=0.801
chr21	8219878	13890	Terminator	A	G,T,C	347278	SNV	AC=2,49,1;AF=0.000399,0.00978,0.0002;AN=5008;BaseQRankSum=1.951;ClippingRankSum=0.000;DP=5972096;ExcessHet=4.2035;FS=0.860;InbreedingCoeff=-0.0009;MLEAC=2,49,1;MLEAF=0.000399,0.00978,0.0002;MQ=50.82;MQRankSum=-1.557;QD=2.58;ReadPosRankSum=-4.925;SOR=0.838
chr21	8219880	13892	Terminator	G	GT,A	47223.5	SNV	AC=3,1;AF=0.000599,0.0002;AN=5008;BaseQRankSum=-0.904;ClippingRankSum=0.000;DP=6039257;ExcessHet=3.0155;FS=0.000;InbreedingCoeff=-0.0007;MLEAC=3,1;MLEAF=0.000599,0.0002;MQ=51.62;MQRankSum=4.262;QD=4.33;ReadPosRankSum=-0.921;SOR=0.657
chr21	8402927	13892	Terminator	C	A	69.38	SNV	AC=4;AF=0.000799;AN=5006;BaseQRankSum=0.546;ClippingRankSum=0.000;DP=47660;ExcessHet=3.2295;FS=13.861;InbreedingCoeff=-0.0075;MLEAC=2;MLEAF=0.0004;MQ=24.59;MQRankSum=-2.059;QD=0.78;ReadPosRankSum=0.000;SOR=3.237
chr21	8219886	13898	Terminator	T	C	340504	SNV	AC=37;AF=0.00739;AN=5008;BaseQRankSum=-7.665;ClippingRankSum=0.000;DP=6019996;ExcessHet=3.5921;FS=0.000;InbreedingCoeff=-0.0074;MLEAC=37;MLEAF=0.00739;MQ=51.58;MQRankSum=-0.265;QD=3.42;ReadPosRankSum=-4.805;SOR=0.656
chr21	8402934	13899	Terminator	T	C	1854.23	SNV	AC=22;AF=0.0044;AN=4998;BaseQRankSum=-0.000;ClippingRankSum=-0.000;DP=37840;ExcessHet=5.6175;FS=22.944;InbreedingCoeff=-0.0201;MLEAC=23;MLEAF=0.0046;MQ=24.39;MQRankSum=-0.214;QD=6.55;ReadPosRankSum=0.728;SOR=2.192
chr21	8447121	13899	Terminator	A	G	724.9	SNV	AC=3;AF=0.000599;AN=5006;BaseQRankSum=0.712;ClippingRankSum=0.000;DP=284814;ExcessHet=7.3164;FS=53.144;InbreedingCoeff=-0.0144;MLEAC=3;MLEAF=0.000599;MQ=32.77;MQRankSum=-0.070;QD=12.29;ReadPosRankSum=0.681;SOR=1.166
chr21	8219890	13902	Terminator	GC	G	17291.5	SNV	AC=4;AF=0.000799;AN=5008;BaseQRankSum=-3.062;ClippingRankSum=0.000;DP=6065604;ExcessHet=3.0285;FS=0.924;InbreedingCoeff=-0.0011;MLEAC=4;MLEAF=0.000799;MQ=51.34;MQRankSum=-0.375;QD=1.95;ReadPosRankSum=0.395;SOR=0.506
chr21	8447125	13903	Terminator	A	C	95413.4	SNV	AC=223;AF=0.0447;AN=4986;BaseQRankSum=-0.326;ClippingRankSum=0.000;DP=277467;ExcessHet=106.7330;FS=9.998;InbreedingCoeff=-0.0748;MLEAC=238;MLEAF=0.0477;MQ=32.28;MQRankSum=-0.908;QD=7.67;ReadPosRankSum=-0.394;SOR=1.358
chr21	8219892	13904	Terminator	CTTTTTTTTTTTTT	CTTTTTTTTTTTT,CTTTTTTTTTTT,CTTTTTTTTTTTTTT,CTTTTTTTT,CTTTTTTTTT,CTTTTTTTTTT,CTTTTTTTTTTTTTTTT,CTTTTTTTTTTTTTTT,CTTTT,C,CTTTTTTT	5.88292e+06	SNV	AC=642,25,56,40,21,6,3,7,61,1,2;AF=0.128,0.00499,0.0112,0.00799,0.00419,0.0012,0.000599,0.0014,0.0122,0.0002,0.000399;AN=5008;BaseQRankSum=0.729;ClippingRankSum=0.000;DP=8950616;ExcessHet=836.0190;FS=0.000;InbreedingCoeff=0.0855;MLEAC=651,25,56,39,21,6,3,7,61,1,2;MLEAF=0.13,0.00499,0.0112,0.00779,0.00419,0.0012,0.000599,0.0014,0.0122,0.0002,0.000399;MQ=52.63;MQRankSum=5.425;QD=2.61;ReadPosRankSum…
chr21	8402940	13905	Terminator	T	G	25345.2	SNV	AC=305;AF=0.0617;AN=4940;BaseQRankSum=0.000;ClippingRankSum=0.000;DP=33336;ExcessHet=109.7837;FS=0.711;InbreedingCoeff=-0.1207;MLEAC=352;MLEAF=0.0713;MQ=23.49;MQRankSum=-0.701;QD=7.31;ReadPosRankSum=0.366;SOR=0.571
chr21	8402941	13906	Terminator	A	T,C	68262.6	SNV	AC=618,1;AF=0.126,0.000204;AN=4894;BaseQRankSum=0.114;ClippingRankSum=-0.000;DP=30977;ExcessHet=305.6387;FS=107.720;InbreedingCoeff=-0.1060;MLEAC=770,1;MLEAF=0.157,0.000204;MQ=23.08;MQRankSum=0.073;QD=9.81;ReadPosRankSum=-0.282;SOR=1.449
chr21	8219896	13908	Terminator	T	TA,*	2325422	SNV	AC=1,336;AF=0.0002,0.0671;AN=5008;BaseQRankSum=-0.623;ClippingRankSum=0.000;DP=9539346;ExcessHet=56.1458;FS=0.734;InbreedingCoeff=-0.0709;MLEAC=1,336;MLEAF=0.0002,0.0671;MQ=2.15;MQRankSum=4.907;QD=2.64;ReadPosRankSum=0.657;SOR=0.624
chr21	8219897	13909	Terminator	T	A,*	1.76107e+06	SNV	AC=9,231;AF=0.0018,0.0461;AN=5008;BaseQRankSum=-2.324;ClippingRankSum=0.000;DP=9699480;ExcessHet=29.4526;FS=0.754;InbreedingCoeff=-0.0486;MLEAC=9,231;MLEAF=0.0018,0.0461;MQ=8.69;MQRankSum=8.825;QD=2.68;ReadPosRankSum=0.837;SOR=0.576
chr21	8219898	13910	Terminator	TTTTTTTTTC	T,GTTTTTTTTC,*	586874	INDEL	AC=3,1,79;AF=0.000599,0.0002,0.0158;AN=5008;BaseQRankSum=0.165;ClippingRankSum=0.000;DP=9917787;ExcessHet=6.0517;FS=1.630;InbreedingCoeff=-0.0120;MLEAC=3,1,78;MLEAF=0.000599,0.0002,0.0156;MQ=7.44;MQRankSum=9.192;QD=2.60;ReadPosRankSum=5.430;SOR=0.519
chr21	8219899	13911	Terminator	TTTTTTTTC	T,CTTTTTTTC,ATTTTTTTC,*	558698	INDEL	AC=4,4,1,72;AF=0.000799,0.000799,0.0002,0.0144;AN=5008;BaseQRankSum=-1.793;ClippingRankSum=0.000;DP=9958898;ExcessHet=5.9844;FS=1.672;InbreedingCoeff=0.0030;MLEAC=4,4,1,72;MLEAF=0.000799,0.000799,0.0002,0.0144;MQ=12.51;MQRankSum=4.171;QD=2.45;ReadPosRankSum=4.288;SOR=0.512
chr21	8219900	13912	Terminator	TTTTTTTC	CTTTTTTC,T,*	2.81456e+06	INDEL	AC=159,4,67;AF=0.0317,0.000799,0.0134;AN=5008;BaseQRankSum=-2.256;ClippingRankSum=0.000;DP=9853322;ExcessHet=27.6667;FS=7.808;InbreedingCoeff=-0.0382;MLEAC=159,4,66;MLEAF=0.0317,0.000799,0.0132;MQ=38.64;MQRankSum=0.519;QD=3.97;ReadPosRankSum=2.511;SOR=0.308
chr21	8219901	13913	Terminator	TTTTTTCTTTCTTTCTTTCTTTCTTTC	TTTTCTTTCTTTCTTTC,TTTTCTTTCTTTCTTTCTTTC,TCTTTTTCTTTCTTTCTTTCTTTCTTTC,T,TTTTTCTTTTTCTTTCTTTCTTTCTTTCTTTC,*	1.42845e+06	SNV	AC=1,61,117,3,1,65;AF=0.0002,0.0122,0.0234,0.0006,0.0002,0.013;AN=5002;BaseQRankSum=-0.630;ClippingRankSum=0.000;DP=9906705;ExcessHet=31.9124;FS=4.029;InbreedingCoeff=-0.0332;MLEAC=1,61,117,3,1,64;MLEAF=0.0002,0.0122,0.0234,0.0006,0.0002,0.0128;MQ=39.23;MQRankSum=-0.861;QD=1.87;ReadPosRankSum=4.796;SOR=0.385
chr21	8219902	13914	Terminator	TTTTTCTTTC	T,TTTTC,TCTTTTCTTTC,CTTTTCTTTC,*	1.59312e+07	INDEL	AC=22,1446,3,14,41;AF=0.00442,0.291,0.000603,0.00281,0.00824;AN=4976;BaseQRankSum=-0.303;ClippingRankSum=0.000;DP=9528866;ExcessHet=2205.7396;FS=4.475;InbreedingCoeff=-0.3827;MLEAC=22,1465,3,14,41;MLEAF=0.00442,0.294,0.000603,0.00281,0.00824;MQ=51.75;MQRankSum=6.914;QD=3.59;ReadPosRankSum=7.219;SOR=0.397
chr21	8219903	13915	Terminator	TTTTCTTTCTTTCTTTCTTTCTTTCTTTTTC	TTTTCTTTCTTTCTTTTTC,TTTTCTTTCTTTCTTTCTTTTTC,TTTTCTTTCTTTCTTTCTTTCTTTTTC,TTCTTTCTTTCTTTCTTTCTTTCTTTCTTTCTTTTTC,TTCTTTCTTTCTTTCTTTCTTTCTTTCTTTTTC,TTCTTTCTTTCTTTCTTTCTTTCTTTCTTTCTTTCTTTTTC,TTTCTTTCTTTCTTTCTTTCTTTCTTTCTTTCTTTCTTTTTC,CTTTCTTTCTTTCTTTCTTTCTTTCTTTTTC,TTTCTTTCTTTCTTTCTTTCTTTCTTTCTTTTTC,TTTTCTTTCTTTCTTTCTTTCTTTCTTTCTTTCTTTTTC,TTTCTTTCTTTCTTTCTTTCTTTCTTTCTTTCTTTCTTTCTTTCTTTTTC,TCTTTCTTTCTT…	2.37016e+07	INDEL	AC=27,15,1286,21,70,4,6,82,133,7,2,11,43,16,1,3,1,1,1,3,1,511;AF=0.00543,0.00302,0.259,0.00422,0.0141,0.000805,0.00121,0.0165,0.0267,0.00141,0.000402,0.00221,0.00865,0.00322,0.000201,0.000603,0.000201,0.000201,0.000201,0.000603,0.000201,0.103;AN=4972;BaseQRankSum=-1.162;ClippingRankSum=0.000;DP=8935957;ExcessHet=2147483647.0000;FS=2.270;InbreedingCoeff=-0.7965;MLEAC=7,14,1287,21,70,2,6,82,133,7,2…
chr21	8447137	13915	Terminator	T	G,C	350.71	SNV	AC=14,1;AF=0.0028,0.0002;AN=4996;BaseQRankSum=-2.362;ClippingRankSum=0.000;DP=277560;ExcessHet=3.1035;FS=27.041;InbreedingCoeff=0.0022;MLEAC=6,1;MLEAF=0.0012,0.0002;MQ=33.51;MQRankSum=0.174;QD=0.85;ReadPosRankSum=-1.003;SOR=4.749
chr21	8219904	13916	Terminator	TTTCTTTC	T,TTTTC,CTTCTTTC,*	2.09973e+07	INDEL	AC=58,37,1,1992;AF=0.0117,0.00744,0.000201,0.401;AN=4972;BaseQRankSum=-0.468;ClippingRankSum=0.000;DP=8915249;ExcessHet=2147483647.0000;FS=3.335;InbreedingCoeff=-0.7026;MLEAC=9,37,1,2015;MLEAF=0.00181,0.00744,0.000201,0.405;MQ=6.88;MQRankSum=2.809;QD=3.78;ReadPosRankSum=4.902;SOR=0.439
chr21	8219905	13917	Terminator	TTCTTTC	T,TTTTC,TTTCTTTCTCTTTC,TTTTCTTTCTCTTTC,TCTCTTTC,TTTTTTTCTTTCTCTTTC,TTTTTCTTTCTCTTTC,*	2.10075e+07	INDEL	AC=52,15,4,8,17,2,1,1998;AF=0.0105,0.00302,0.000805,0.00161,0.00342,0.000402,0.000201,0.402;AN=4972;BaseQRankSum=0.141;ClippingRankSum=0.000;DP=8899950;ExcessHet=2147483647.0000;FS=3.335;InbreedingCoeff=-0.6847;MLEAC=2,15,4,8,16,2,1,2009;MLEAF=0.000402,0.00302,0.000805,0.00161,0.00322,0.000402,0.000201,0.404;MQ=7.06;MQRankSum=2.057;QD=3.77;ReadPosRankSum=3.578;SOR=0.438
chr21	8219906	13918	Terminator	TCTTTCTTTCTTTC	TTTTCTTTCTTTC,TTTCTTTCTCCTTTCTTTCTTTC,T,*	2.09224e+07	INDEL	AC=84,6,1,2001;AF=0.0169,0.00121,0.000202,0.403;AN=4962;BaseQRankSum=-0.457;ClippingRankSum=0.000;DP=8929350;ExcessHet=2147483647.0000;FS=3.335;InbreedingCoeff=-0.7082;MLEAC=35,6,1,2036;MLEAF=0.00705,0.00121,0.000202,0.41;MQ=6.20;MQRankSum=2.419;QD=3.75;ReadPosRankSum=-5.520;SOR=0.437
chr21	8402953	13918	Terminator	GC	G	974.29	SNV	AC=9;AF=0.00192;AN=4676;BaseQRankSum=-0.000;ClippingRankSum=-0.000;DP=24635;ExcessHet=5.2705;FS=15.027;InbreedingCoeff=-0.0738;MLEAC=11;MLEAF=0.00235;MQ=14.42;MQRankSum=-0.712;QD=13.17;ReadPosRankSum=1.282;SOR=2.160
chr21	8219907	13919	Terminator	CTTTCTTTCTTTCTTTCTTTCTT	C,TTTTCTTTCTTTCTTTCTTTCTT,CTCTTTCTTTCTTTCTT,*	2.10362e+07	INDEL	AC=59,67,1,2001;AF=0.0119,0.0135,0.000201,0.403;AN=4970;BaseQRankSum=-0.808;ClippingRankSum=0.000;DP=8891749;ExcessHet=2147483647.0000;FS=3.356;InbreedingCoeff=-0.7278;MLEAC=9,67,1,2011;MLEAF=0.00181,0.0135,0.000201,0.405;MQ=8.51;MQRankSum=0.783;QD=3.71;ReadPosRankSum=1.287;SOR=0.439
chr21	8402954	13919	Terminator	CCTTTTTT	CTTT,C,CTTTT,CT,CTTTTT,*	4563.36	INDEL	AC=1,7,9,5,1,9;AF=0.000229,0.0016,0.00206,0.00114,0.000229,0.00206;AN=4374;BaseQRankSum=0.338;ClippingRankSum=-0.000;DP=23225;ExcessHet=3.9804;FS=0.714;InbreedingCoeff=0.3445;MLEAC=1,6,9,4,1,9;MLEAF=0.000229,0.00137,0.00206,0.000914,0.000229,0.00206;MQ=10.33;MQRankSum=-0.191;QD=18.94;ReadPosRankSum=0.842;SOR=0.716
chr21	8219908	13920	Terminator	TTTCTTTCTTTCTTTC	TTTTC,T,*	1.28128e+07	INDEL	AC=57,1,1106;AF=0.0124,0.000217,0.24;AN=4614;BaseQRankSum=0.051;ClippingRankSum=0.000;DP=10312050;ExcessHet=2587.8293;FS=3.180;InbreedingCoeff=-0.2656;MLEAC=4,1,1320;MLEAF=0.000867,0.000217,0.286;MQ=2.73;MQRankSum=3.910;QD=4.13;ReadPosRankSum=-7.486;SOR=0.472
chr21	8402955	13920	Terminator	CTTTTTTT	TTTTTTTT,CTTTTT,CTTTTTT,C,*	41702	SNV	AC=319,14,5,1,23;AF=0.106,0.00465,0.00166,0.000332,0.00764;AN=3012;BaseQRankSum=0.566;ClippingRankSum=-0.000;DP=17029;ExcessHet=142.4663;FS=61.553;InbreedingCoeff=0.1529;MLEAC=342,12,3,1,24;MLEAF=0.114,0.00398,0.000996,0.000332,0.00797;MQ=17.02;MQRankSum=0.319;QD=15.80;ReadPosRankSum=-0.319;SOR=0.840
chr21	8219909	13921	Terminator	TTCTTTCTTTC	TTCTCTTTCTTTC,TTTTCTTTC,TCTCTTTCTTTC,T,*	1.29445e+07	INDEL	AC=64,5,1,1,1124;AF=0.0128,0.001,0.0002,0.0002,0.225;AN=5002;BaseQRankSum=-1.889;ClippingRankSum=0.000;DP=10273542;ExcessHet=775.0673;FS=3.227;InbreedingCoeff=-0.2829;MLEAC=11,5,1,1,1124;MLEAF=0.0022,0.001,0.0002,0.0002,0.225;MQ=5.36;MQRankSum=1.653;QD=4.07;ReadPosRankSum=-1.599;SOR=0.470
chr21	8402956	13921	Terminator	T	A,*	6205.26	SNV	AC=2,42;AF=0.00202,0.0425;AN=988;BaseQRankSum=-0.967;ClippingRankSum=-0.000;DP=10615;ExcessHet=3.5095;FS=78.314;InbreedingCoeff=0.1032;MLEAC=3,60;MLEAF=0.00304,0.0607;MQ=1.01;MQRankSum=1.006;QD=17.09;ReadPosRankSum=2.189;SOR=2.280
chr21	8219910	13922	Terminator	TC	T,*	1.49312e+07	INDEL	AC=54,1347;AF=0.0108,0.269;AN=5002;BaseQRankSum=-1.954;ClippingRankSum=0.000;DP=10050519;ExcessHet=1231.0625;FS=2.308;InbreedingCoeff=-0.3891;MLEAC=54,1352;MLEAF=0.0108,0.27;MQ=1.20;MQRankSum=6.425;QD=3.97;ReadPosRankSum=-10.861;SOR=0.464
chr21	8219911	13923	Terminator	CTTTCTTTCTTTCTTTCTT	CT,CTCTTTCTTTCTTTCTT,C,*	14701679	INDEL	AC=57,12,4,1286;AF=0.0114,0.0024,0.0008,0.257;AN=5002;BaseQRankSum=-4.945;ClippingRankSum=0.000;DP=10089242;ExcessHet=1230.4751;FS=3.238;InbreedingCoeff=-0.3172;MLEAC=4,12,4,1301;MLEAF=0.0008,0.0024,0.0008,0.26;MQ=5.88;MQRankSum=-0.974;QD=4.00;ReadPosRankSum=-1.952;SOR=0.460
chr21	8219913	13925	Terminator	T	TTC,*	1.94371e+06	SNV	AC=26,223;AF=0.00519,0.0445;AN=5008;BaseQRankSum=-2.374;ClippingRankSum=0.000;DP=11458441;ExcessHet=31.2562;FS=2.376;InbreedingCoeff=-0.0520;MLEAC=12,222;MLEAF=0.0024,0.0443;MQ=10.87;MQRankSum=-3.032;QD=2.96;ReadPosRankSum=2.194;SOR=0.494
chr21	8447147	13925	Terminator	T	G	11304.8	SNV	AC=86;AF=0.0172;AN=4986;BaseQRankSum=0.352;ClippingRankSum=0.000;DP=282902;ExcessHet=7.4046;FS=109.899;InbreedingCoeff=-0.0255;MLEAC=85;MLEAF=0.017;MQ=31.50;MQRankSum=-2.466;QD=4.05;ReadPosRankSum=-2.587;SOR=8.107
chr21	8447148	13926	Terminator	A	T	22443.2	SNV	AC=155;AF=0.0315;AN=4926;BaseQRankSum=-1.987;ClippingRankSum=0.000;DP=248423;ExcessHet=1247.2850;FS=1.712;InbreedingCoeff=-0.2834;MLEAC=486;MLEAF=0.0987;MQ=30.38;MQRankSum=-1.139;QD=3.92;ReadPosRankSum=-0.385;SOR=0.878
chr21	8219915	13927	Terminator	CTTTCTTTCTTTCTT	CTCTTTCTTTCTT,CTTTCTTTCTTTTTCTTTCTTTCTT,C,*	1.92755e+06	INDEL	AC=19,13,1,208;AF=0.00379,0.0026,0.0002,0.0415;AN=5008;BaseQRankSum=-0.957;ClippingRankSum=0.000;DP=11468130;ExcessHet=28.0016;FS=2.366;InbreedingCoeff=-0.0160;MLEAC=5,13,1,208;MLEAF=0.000998,0.0026,0.0002,0.0415;MQ=12.87;MQRankSum=-5.303;QD=3.08;ReadPosRankSum=2.172;SOR=0.499
chr21	8219916	13928	Terminator	T	C,*	510391	SNV	AC=10,86;AF=0.002,0.0172;AN=5008;BaseQRankSum=-0.524;ClippingRankSum=0.000;DP=11649517;ExcessHet=7.0633;FS=1.652;InbreedingCoeff=-0.0187;MLEAC=10,86;MLEAF=0.002,0.0172;MQ=13.86;MQRankSum=2.936;QD=2.05;ReadPosRankSum=-0.193;SOR=0.516
chr21	8219917	13929	Terminator	TTCTTTC	T,TTTTC,CTCTTTC,*	489813	INDEL	AC=3,1,1,87;AF=0.000599,0.0002,0.0002,0.0174;AN=5008;BaseQRankSum=0.814;ClippingRankSum=0.000;DP=11652281;ExcessHet=6.5497;FS=1.645;InbreedingCoeff=-0.0179;MLEAC=1,1,1,87;MLEAF=0.0002,0.0002,0.0002,0.0174;MQ=9.40;MQRankSum=-4.816;QD=2.06;ReadPosRankSum=5.165;SOR=0.507
chr21	8219918	13930	Terminator	TC	T,*	470443	INDEL	AC=3,86;AF=0.000599,0.0172;AN=5008;BaseQRankSum=0.898;ClippingRankSum=0.000;DP=11657717;ExcessHet=6.4675;FS=1.645;InbreedingCoeff=-0.0181;MLEAC=3,86;MLEAF=0.000599,0.0172;MQ=6.25;MQRankSum=1.226;QD=2.05;ReadPosRankSum=-6.083;SOR=0.511
chr21	8219919	13931	Terminator	CTTTCTTTCTTTTTCTTTCTT	CTCTTTCTT,TTTTCTTTCTTTTTCTTTCTT,CTTTTTCTTTCTTTTTCTTTCTT,CTCTTTCTTTTTCTTTCTT,CTTTCTTTCTT,CTTTTCTTTCTTTTTCTTTCTT,C,*	1.00889e+06	INDEL	AC=95,1,5,6,7,1,1,84;AF=0.019,0.0002,0.000998,0.0012,0.0014,0.0002,0.0002,0.0168;AN=5008;BaseQRankSum=-1.745;ClippingRankSum=0.000;DP=11566106;ExcessHet=22.6884;FS=0.870;InbreedingCoeff=0.0243;MLEAC=94,1,5,6,7,1,1,84;MLEAF=0.0188,0.0002,0.000998,0.0012,0.0014,0.0002,0.0002,0.0168;MQ=40.28;MQRankSum=-8.409;QD=1.78;ReadPosRankSum=-1.518;SOR=0.519
chr21	8402966	13931	Terminator	TTTTTTTTTC	T,*	1252.51	INDEL	AC=11,2;AF=0.0114,0.00208;AN=962;BaseQRankSum=-0.000;ClippingRankSum=-0.000;DP=8894;ExcessHet=0.9185;FS=0.000;InbreedingCoeff=0.0904;MLEAC=14,2;MLEAF=0.0146,0.00208;MQ=2.21;MQRankSum=-0.524;QD=25.05;ReadPosRankSum=1.282;SOR=1.426
chr21	8219920	13932	Terminator	TTTCTTTC	T,*	904578	INDEL	AC=4,166;AF=0.000799,0.0331;AN=5008;BaseQRankSum=0.567;ClippingRankSum=0.000;DP=11600437;ExcessHet=16.0523;FS=1.860;InbreedingCoeff=-0.0334;MLEAC=3,166;MLEAF=0.000599,0.0331;MQ=7.49;MQRankSum=-1.266;QD=1.86;ReadPosRankSum=2.950;SOR=0.489
chr21	8402967	13932	Terminator	T	C,*	1565.49	SNV	AC=3,13;AF=0.00302,0.0131;AN=994;BaseQRankSum=-0.000;ClippingRankSum=-0.000;DP=8996;ExcessHet=1.3590;FS=0.000;InbreedingCoeff=0.0869;MLEAC=4,16;MLEAF=0.00402,0.0161;MQ=1.50;MQRankSum=0.253;QD=23.72;ReadPosRankSum=0.431;SOR=0.908
chr21	8219921	13933	Terminator	TTCTTTCTTTTTC	TTTTCTTTTTC,T,*	1.10213e+06	INDEL	AC=28,1,167;AF=0.00559,0.0002,0.0333;AN=5008;BaseQRankSum=0.830;ClippingRankSum=0.000;DP=11571354;ExcessHet=20.3108;FS=0.870;InbreedingCoeff=-0.0393;MLEAC=27,1,167;MLEAF=0.00539,0.0002,0.0333;MQ=18.82;MQRankSum=-1.198;QD=1.96;ReadPosRankSum=3.790;SOR=0.502
chr21	8402968	13933	Terminator	TTTTTTTC	GTTTTTTC,CTTTTTTC,T,*	3005.47	INDEL	AC=6,12,1,13;AF=0.00611,0.0122,0.00102,0.0132;AN=982;BaseQRankSum=-0.967;ClippingRankSum=-0.000;DP=8847;ExcessHet=8.4556;FS=14.988;InbreedingCoeff=0.3525;MLEAC=7,10,1,14;MLEAF=0.00713,0.0102,0.00102,0.0143;MQ=2.97;MQRankSum=-0.366;QD=30.05;ReadPosRankSum=0.598;SOR=3.553
chr21	8447155	13933	Terminator	G	T	1250.81	SNV	AC=4;AF=0.000807;AN=4958;BaseQRankSum=-2.078;ClippingRankSum=0.000;DP=277424;ExcessHet=84.9674;FS=82.000;InbreedingCoeff=-0.0619;MLEAC=3;MLEAF=0.000605;MQ=23.91;MQRankSum=0.856;QD=11.91;ReadPosRankSum=1.422;SOR=4.962
chr21	8219922	13934	Terminator	TCTTTCTTTTTCTTTC	T,*	1.0853e+06	INDEL	AC=3,193;AF=0.000599,0.0385;AN=5008;BaseQRankSum=1.105;ClippingRankSum=0.000;DP=11572991;ExcessHet=20.2820;FS=0.870;InbreedingCoeff=-0.0405;MLEAC=3,193;MLEAF=0.000599,0.0385;MQ=4.73;MQRankSum=1.199;QD=1.94;ReadPosRankSum=-6.444;SOR=0.506
chr21	8402969	13934	Terminator	T	G,*	1978.24	SNV	AC=7,14;AF=0.00701,0.014;AN=998;BaseQRankSum=-0.967;ClippingRankSum=-0.000;DP=8769;ExcessHet=1.7676;FS=3.885;InbreedingCoeff=0.0978;MLEAC=6,16;MLEAF=0.00601,0.016;MQ=1.79;MQRankSum=-0.000;QD=34.11;ReadPosRankSum=1.282;SOR=1.794
chr21	8447156	13934	Terminator	T	C,G	4232.1	SNV	AC=15,1;AF=0.00303,0.000202;AN=4956;BaseQRankSum=-1.306;ClippingRankSum=0.000;DP=277211;ExcessHet=3.1188;FS=34.464;InbreedingCoeff=0.0063;MLEAC=13,1;MLEAF=0.00262,0.000202;MQ=28.96;MQRankSum=-0.365;QD=6.22;ReadPosRankSum=1.603;SOR=3.690
chr21	8219923	13935	Terminator	CTTTCTTTT	CTTTTTCTTTT,CTT,TTTTCTTTT,C,CTTT,*	1.29094e+06	INDEL	AC=31,18,1,3,1,188;AF=0.00619,0.00359,0.0002,0.000599,0.0002,0.0375;AN=5008;BaseQRankSum=0.334;ClippingRankSum=0.000;DP=11527625;ExcessHet=31.5079;FS=0.872;InbreedingCoeff=-0.0052;MLEAC=30,18,1,3,1,189;MLEAF=0.00599,0.00359,0.0002,0.000599,0.0002,0.0377;MQ=22.83;MQRankSum=-3.687;QD=1.94;ReadPosRankSum=4.293;SOR=0.539
[truncated: 2,340 more rows]
