# Supplementary material
Source: HighWire-hosted journal article supplement (doi:10.1101/rna.078925.121)
Supplement: Supplemental_Table_S3.xlsx [file Supplemental_Table_S3.xlsx]

## Sheet: Sheet1
Supplemental Table S3. RNA-seq validated positions and RNA variant calls.
#CHROM	Position	Copy position	Domain	REF	ALT	QUAL	INFO
chr21	8252374	2177	5'ETS	T	C	11111.3	AC=2;AF=0.2;AN=10;BaseQRankSum=6.900;ClippingRankSum=0.000;DP=901;ExcessHet=3.5218;FS=74.714;MLEAC=2;MLEAF=0.2;MQ=60.00;MQRankSum=0.000;QD=14.23;ReadPosRankSum=2.862;SOR=4.111
chr21	8208325	2337	5'ETS	A	G	221.19	AC=2;AF=0.2;AN=10;BaseQRankSum=1.459;ClippingRankSum=0.000;DP=259;ExcessHet=3.5218;FS=0.000;MLEAC=2;MLEAF=0.2;MQ=60.00;MQRankSum=0.000;QD=1.68;ReadPosRankSum=1.282;SOR=0.029
chr21	8208375	2387	5'ETS	T	G	219.69	AC=1;AF=0.1;AN=10;BaseQRankSum=0.437;ClippingRankSum=0.000;DP=343;ExcessHet=3.0103;FS=0.000;MLEAC=1;MLEAF=0.1;MQ=60.00;MQRankSum=0.000;QD=1.50;ReadPosRankSum=-0.155;SOR=0.021
chr21	8208410	2422	5'ETS	C	A	317.69	AC=1;AF=0.1;AN=10;BaseQRankSum=0.303;ClippingRankSum=0.000;DP=376;ExcessHet=3.0103;FS=0.000;MLEAC=1;MLEAF=0.1;MQ=60.00;MQRankSum=0.000;QD=2.12;ReadPosRankSum=1.784;SOR=0.014
chr21	8208431	2443	5'ETS	C	G	287.69	AC=1;AF=0.1;AN=10;BaseQRankSum=0.612;ClippingRankSum=0.000;DP=297;ExcessHet=3.0103;FS=0.000;MLEAC=1;MLEAF=0.1;MQ=60.00;MQRankSum=0.000;QD=6.25;ReadPosRankSum=-2.903;SOR=0.752
chr21	8208507	2519	5'ETS	G	C	63.69	AC=1;AF=0.1;AN=10;BaseQRankSum=0.728;ClippingRankSum=-0.000;DP=130;ExcessHet=3.0103;FS=0.000;MLEAC=1;MLEAF=0.1;MQ=60.00;MQRankSum=-0.000;QD=6.37;ReadPosRankSum=-1.150;SOR=0.836
chr21	8208557	2569	5'ETS	G	A	164.69	AC=1;AF=0.1;AN=10;BaseQRankSum=-1.332;ClippingRankSum=0.000;DP=264;ExcessHet=3.0103;FS=8.123;MLEAC=1;MLEAF=0.1;MQ=60.00;MQRankSum=0.000;QD=1.98;ReadPosRankSum=2.105;SOR=0.090
chr21	8208934	2946	5'ETS	C	T	235.29	AC=1;AF=0.1;AN=10;BaseQRankSum=1.141;ClippingRankSum=0.000;DP=154;ExcessHet=3.4242;FS=3.680;MLEAC=1;MLEAF=0.1;MQ=60.00;MQRankSum=0.000;QD=4.06;ReadPosRankSum=0.299;SOR=1.431
chr21	8208979	2991	5'ETS	C	T	105.69	AC=1;AF=0.1;AN=10;BaseQRankSum=-2.724;ClippingRankSum=0.000;DP=285;ExcessHet=3.0103;FS=0.000;MLEAC=1;MLEAF=0.1;MQ=60.00;MQRankSum=0.000;QD=0.79;ReadPosRankSum=2.294;SOR=0.712
chr21	8253394	3197	5'ETS	C	A	142.88	AC=1;AF=0.125;AN=8;BaseQRankSum=-0.000;ClippingRankSum=-0.000;DP=57;ExcessHet=3.0103;FS=0.000;MLEAC=1;MLEAF=0.125;MQ=60.00;MQRankSum=-0.000;QD=11.91;ReadPosRankSum=0.911;SOR=0.446
chr21	8209192	3204	5'ETS	C	A	115.17	AC=1;AF=0.1;AN=10;BaseQRankSum=0.551;ClippingRankSum=0.000;DP=256;ExcessHet=3.0103;FS=0.000;MLEAC=1;MLEAF=0.1;MQ=60.00;MQRankSum=0.000;QD=1.52;ReadPosRankSum=0.667;SOR=0.021
chr21	8209614	3626	5'ETS	C	A	907.03	AC=1;AF=0.125;AN=8;BaseQRankSum=3.207;ClippingRankSum=0.000;DP=96;ExcessHet=3.5218;FS=13.431;MLEAC=1;MLEAF=0.125;MQ=59.25;MQRankSum=0.000;QD=11.63;ReadPosRankSum=0.000;SOR=3.360
chr21	8212485	6497	ITS1	TG	T	2977.98	AC=8;AF=0.8;AN=10;BaseQRankSum=-0.234;ClippingRankSum=0.000;DP=277;ExcessHet=3.5218;FS=0.000;MLEAC=8;MLEAF=0.8;MQ=60.00;MQRankSum=0.000;QD=25.24;ReadPosRankSum=2.901;SOR=3.223
chr21	8256702	6505	ITS1	G	T	30	AC=1;AF=0.5;AN=2;BaseQRankSum=-0.171;ClippingRankSum=0.000;DP=57;ExcessHet=3.0103;FS=0.000;MLEAC=1;MLEAF=0.5;MQ=60.00;MQRankSum=0.000;QD=0.61;ReadPosRankSum=3.082;SOR=0.593
chr21	8212957	6969	ITS2	A	G	31.29	AC=1;AF=0.1;AN=10;BaseQRankSum=1.884;ClippingRankSum=0.000;DP=494;ExcessHet=3.4242;FS=0.000;MLEAC=1;MLEAF=0.1;MQ=60.00;MQRankSum=0.000;QD=0.16;ReadPosRankSum=-0.297;SOR=0.008
chr21	8396042	7007	ITS2	G	A	36.74	AC=1;AF=0.1;AN=10;BaseQRankSum=1.121;ClippingRankSum=0.000;DP=128;ExcessHet=3.0103;FS=0.000;MLEAC=1;MLEAF=0.1;MQ=60.00;MQRankSum=0.000;QD=1.11;ReadPosRankSum=-0.148;SOR=0.112
chr21	8257268	7071	ITS2	T	G	66110.5	AC=6;AF=0.6;AN=10;BaseQRankSum=-2.323;ClippingRankSum=0.000;DP=2416;ExcessHet=7.2016;FS=4.766;MLEAC=6;MLEAF=0.6;MQ=60.00;MQRankSum=0.000;QD=27.42;ReadPosRankSum=-2.594;SOR=0.143
chr21	8213133	7145	ITS2	G	T	991.69	AC=1;AF=0.1;AN=10;BaseQRankSum=-5.698;ClippingRankSum=0.000;DP=1148;ExcessHet=3.0103;FS=0.000;MLEAC=1;MLEAF=0.1;MQ=60.00;MQRankSum=0.000;QD=1.68;ReadPosRankSum=-0.186;SOR=0.291
chr21	8213184	7196	ITS2	G	GT	1987.13	AC=2;AF=0.2;AN=10;BaseQRankSum=0.199;ClippingRankSum=0.000;DP=1920;ExcessHet=3.5218;FS=0.000;MLEAC=2;MLEAF=0.2;MQ=60.00;MQRankSum=0.000;QD=1.45;ReadPosRankSum=12.693;SOR=0.098
chr21	8257395	7198	ITS2	G	C	3179.69	AC=1;AF=0.1;AN=10;BaseQRankSum=0.495;ClippingRankSum=0.000;DP=1176;ExcessHet=3.0103;FS=2.453;MLEAC=1;MLEAF=0.1;MQ=60.00;MQRankSum=0.000;QD=5.77;ReadPosRankSum=-1.445;SOR=0.934
chr21	8396257	7222	ITS2	A	C	784.92	AC=3;AF=0.3;AN=10;BaseQRankSum=1.424;ClippingRankSum=0.000;DP=551;ExcessHet=4.7712;FS=22.969;MLEAC=3;MLEAF=0.3;MQ=60.00;MQRankSum=0.000;QD=1.68;ReadPosRankSum=3.402;SOR=4.488
chr21	8213222	7234	ITS2	A	C	2922.69	AC=1;AF=0.1;AN=10;BaseQRankSum=1.495;ClippingRankSum=0.000;DP=1282;ExcessHet=3.0103;FS=6.601;MLEAC=1;MLEAF=0.1;MQ=60.00;MQRankSum=0.000;QD=3.91;ReadPosRankSum=5.237;SOR=2.202
chr21	8396303	7268	ITS2	C	T	36.69	AC=1;AF=0.1;AN=10;BaseQRankSum=-2.680;ClippingRankSum=0.000;DP=567;ExcessHet=3.0103;FS=5.483;MLEAC=1;MLEAF=0.1;MQ=60.00;MQRankSum=0.000;QD=0.23;ReadPosRankSum=-0.336;SOR=0.030
chr21	8213340	7352	ITS2	C	A	31	AC=1;AF=0.5;AN=2;BaseQRankSum=-1.847;ClippingRankSum=0.000;DP=466;ExcessHet=3.0103;FS=0.000;MLEAC=1;MLEAF=0.5;MQ=60.00;MQRankSum=0.000;QD=0.07;ReadPosRankSum=7.823;SOR=0.644
chr21	8396436	7401	ITS2	C	G	14133.2	AC=2;AF=0.2;AN=10;BaseQRankSum=2.257;ClippingRankSum=0.000;DP=438;ExcessHet=0.6367;FS=5.057;MLEAC=3;MLEAF=0.3;MQ=60.00;MQRankSum=0.000;QD=36.15;ReadPosRankSum=8.852;SOR=2.080
chr21	8213402	7414	ITS2	G	GCC	1094.65	AC=1;AF=0.1;AN=10;BaseQRankSum=0.842;ClippingRankSum=0.000;DP=1422;ExcessHet=3.0103;FS=2.191;MLEAC=1;MLEAF=0.1;MQ=60.00;MQRankSum=0.000;QD=1.50;ReadPosRankSum=1.372;SOR=1.294
chr21	8396478	7443	ITS2	G	A	109.8	AC=1;AF=0.125;AN=8;BaseQRankSum=1.085;ClippingRankSum=-0.000;DP=224;ExcessHet=3.0103;FS=3.522;MLEAC=1;MLEAF=0.125;MQ=49.92;MQRankSum=-0.000;QD=12.20;ReadPosRankSum=0.262;SOR=2.712
chr21	8213448	7460	ITS2	G	A	5563.17	AC=2;AF=0.2;AN=10;BaseQRankSum=1.311;ClippingRankSum=0.000;DP=1079;ExcessHet=3.5218;FS=15.563;MLEAC=2;MLEAF=0.2;MQ=60.00;MQRankSum=0.000;QD=7.97;ReadPosRankSum=5.390;SOR=2.577
chr21	8257660	7463	ITS2	G	A	1122.18	AC=2;AF=0.2;AN=10;BaseQRankSum=0.938;ClippingRankSum=0.000;DP=533;ExcessHet=3.5218;FS=0.000;MLEAC=2;MLEAF=0.2;MQ=60.00;MQRankSum=0.000;QD=5.22;ReadPosRankSum=1.066;SOR=0.508
chr21	8396696	7661	ITS2	C	G	3234.69	AC=1;AF=0.1;AN=10;BaseQRankSum=-2.646;ClippingRankSum=0.000;DP=627;ExcessHet=3.0103;FS=0.000;MLEAC=1;MLEAF=0.1;MQ=60.00;MQRankSum=0.000;QD=6.87;ReadPosRankSum=0.283;SOR=0.100
chr21	8396795	7760	ITS2	C	G	194949	AC=7;AF=0.7;AN=10;BaseQRankSum=0.541;ClippingRankSum=0.000;DP=5795;ExcessHet=4.7712;FS=0.000;MLEAC=7;MLEAF=0.7;MQ=60.00;MQRankSum=0.000;QD=33.66;ReadPosRankSum=4.037;SOR=0.212
chr21	8213757	7769	ITS2	C	G	4722.92	AC=7;AF=0.7;AN=10;BaseQRankSum=0.605;ClippingRankSum=-0.000;DP=180;ExcessHet=4.7712;FS=23.488;MLEAC=7;MLEAF=0.7;MQ=60.00;MQRankSum=-0.000;QD=26.24;ReadPosRankSum=-0.246;SOR=0.111
chr21	8257978	7781	ITS2	C	T	148.35	AC=5;AF=0.833;AN=6;BaseQRankSum=0.566;ClippingRankSum=-0.000;DP=12;ExcessHet=3.0103;FS=0.000;MLEAC=5;MLEAF=0.833;MQ=60.00;MQRankSum=-0.000;QD=16.48;ReadPosRankSum=1.981;SOR=0.662
chr21	8396884	7849	ITS2	T	G	241.69	AC=1;AF=0.1;AN=10;BaseQRankSum=1.406;ClippingRankSum=0.000;DP=462;ExcessHet=3.0103;FS=0.000;MLEAC=1;MLEAF=0.1;MQ=60.00;MQRankSum=0.000;QD=3.36;ReadPosRankSum=1.523;SOR=0.363
chr21	8214669	8681	28S	GTCC	G	165.65	AC=1;AF=0.1;AN=10;BaseQRankSum=0.617;ClippingRankSum=0.000;DP=265;ExcessHet=3.0103;FS=0.000;MLEAC=1;MLEAF=0.1;MQ=60.00;MQRankSum=0.000;QD=4.60;ReadPosRankSum=1.397;SOR=0.069
chr21	8214672	8684	28S	C	CG	132.65	AC=1;AF=0.1;AN=10;BaseQRankSum=0.755;ClippingRankSum=0.000;DP=265;ExcessHet=3.0103;FS=0.000;MLEAC=1;MLEAF=0.1;MQ=60.00;MQRankSum=0.000;QD=3.68;ReadPosRankSum=1.002;SOR=0.069
chr21	8214734	8746	28S	GGGC	G	3110.13	AC=2;AF=0.2;AN=10;BaseQRankSum=4.582;ClippingRankSum=0.000;DP=2318;ExcessHet=3.5218;FS=0.000;MLEAC=2;MLEAF=0.2;MQ=60.00;MQRankSum=0.000;QD=1.84;ReadPosRankSum=11.330;SOR=0.656
chr21	8214749	8761	28S	T	C	330.17	AC=1;AF=0.1;AN=10;BaseQRankSum=5.334;ClippingRankSum=0.000;DP=940;ExcessHet=3.4242;FS=3.495;MLEAC=1;MLEAF=0.1;MQ=60.00;MQRankSum=0.000;QD=1.68;ReadPosRankSum=3.578;SOR=0.975
chr21	8216999	11011	28S	G	T	559.19	AC=2;AF=0.2;AN=10;BaseQRankSum=-1.124;ClippingRankSum=0.000;DP=203;ExcessHet=3.5218;FS=5.587;MLEAC=2;MLEAF=0.2;MQ=60.00;MQRankSum=0.000;QD=4.95;ReadPosRankSum=2.638;SOR=0.738
chr21	8217036	11048	28S	C	G	34.81	AC=1;AF=0.1;AN=10;BaseQRankSum=-2.273;ClippingRankSum=0.000;DP=161;ExcessHet=3.0103;FS=12.579;MLEAC=1;MLEAF=0.1;MQ=60.00;MQRankSum=0.000;QD=1.20;ReadPosRankSum=-0.100;SOR=3.240
chr21	8444271	11050	28S	G	GGA	1989.69	AC=1;AF=0.1;AN=10;BaseQRankSum=-1.054;ClippingRankSum=0.000;DP=322;ExcessHet=3.0103;FS=0.000;MLEAC=1;MLEAF=0.1;MQ=60.00;MQRankSum=0.000;QD=17.93;ReadPosRankSum=1.302;SOR=1.230
chr21	8444476	11255	28S	GC	G	57.01	AC=2;AF=0.25;AN=8;BaseQRankSum=0.431;ClippingRankSum=-0.000;DP=37;ExcessHet=3.6798;FS=6.021;MLEAC=3;MLEAF=0.375;MQ=60.00;MQRankSum=-0.000;QD=3.56;ReadPosRankSum=1.834;SOR=2.584
chr21	8444482	11261	28S	C	CCCCA	253.05	AC=1;AF=0.125;AN=8;BaseQRankSum=1.559;ClippingRankSum=0.000;DP=36;ExcessHet=3.0103;FS=13.365;MLEAC=1;MLEAF=0.125;MQ=60.00;MQRankSum=0.000;QD=28.12;ReadPosRankSum=2.646;SOR=4.351
chr21	8444487	11266	28S	CA	C	31.93	AC=1;AF=0.125;AN=8;BaseQRankSum=-1.368;ClippingRankSum=-0.000;DP=64;ExcessHet=3.5218;FS=0.000;MLEAC=1;MLEAF=0.125;MQ=60.00;MQRankSum=-0.000;QD=4.56;ReadPosRankSum=-0.000;SOR=0.495
chr21	8444496	11275	28S	T	G	32.92	AC=1;AF=0.125;AN=8;BaseQRankSum=-2.373;ClippingRankSum=0.000;DP=73;ExcessHet=3.5218;FS=9.442;MLEAC=1;MLEAF=0.125;MQ=60.00;MQRankSum=0.000;QD=1.65;ReadPosRankSum=1.489;SOR=3.383
chr21	8444498	11277	28S	T	G	102.33	AC=2;AF=0.25;AN=8;BaseQRankSum=-2.443;ClippingRankSum=0.000;DP=71;ExcessHet=4.7712;FS=12.325;MLEAC=3;MLEAF=0.375;MQ=60.00;MQRankSum=0.000;QD=3.30;ReadPosRankSum=1.675;SOR=3.767
chr21	8444547	11326	28S	T	G	74.88	AC=2;AF=0.25;AN=8;BaseQRankSum=-0.477;ClippingRankSum=0.000;DP=53;ExcessHet=5.4407;FS=2.568;MLEAC=3;MLEAF=0.375;MQ=60.00;MQRankSum=0.000;QD=2.20;ReadPosRankSum=-0.227;SOR=1.819
chr21	8217378	11390	28S	G	A	629.7	AC=1;AF=0.125;AN=8;BaseQRankSum=-1.327;ClippingRankSum=0.000;DP=126;ExcessHet=3.0103;FS=1.222;MLEAC=1;MLEAF=0.125;MQ=60.00;MQRankSum=0.000;QD=12.85;ReadPosRankSum=0.437;SOR=0.458
chr21	8402106	13071	3'ETS	T	TG	301.4	AC=3;AF=0.375;AN=8;BaseQRankSum=-0.842;ClippingRankSum=0.000;DP=43;ExcessHet=5.4407;FS=0.000;MLEAC=3;MLEAF=0.375;MQ=59.21;MQRankSum=0.000;QD=8.37;ReadPosRankSum=1.282;SOR=0.504
chr21	8402108	13073	3'ETS	T	G	1694.75	AC=8;AF=1;AN=8;BaseQRankSum=0.000;ClippingRankSum=0.000;DP=43;ExcessHet=3.0103;FS=0.000;MLEAC=8;MLEAF=1;MQ=59.30;MQRankSum=0.000;QD=40.35;ReadPosRankSum=1.737;SOR=6.091
