# Supplementary material
Source: HighWire-hosted journal article supplement (doi:10.1101/rna.078925.121)
Supplement: Supplemental_Table_S4.xlsx [file Supplemental_Table_S4.xlsx]

## Sheet: Summary
Supplemental Table S4. Variant allele frequencies in 26 populations.
Population	2177	2337	2387	2422	2443	2569	2946	3197	3204	6969	7196	7198	7222	7234	7401	7414	7443	7460	7760	7769	7781	7849	8681	8684	8746	8761	11011	11048	11050	11255	11261	11266	11275	11277	11325	11390	13071	13073	Average
ACB	7.14526	8.50208	1.58125	1.27396	0.696875	1.48958	0.322917	0.481928	1.02615	0.463441	5.00937	4.14688	7.58854	7.16146	12.0755	1.775	6.22917	9.33021	18.375	13.5076	44.4444	0	2.59271	2.43854	10.3271	24.1937	2.62917	0.373958	0.938298	2.84362	7.89247	40.2419	14.8398	0.28913	3.34894	23.8189	20.547	72.2464	9.51422
ASW	8.26557	6.29508	2.07869	0	2.0541	1.64754	0.313115	0.961538	0	0.940678	6.91475	4.91167	6.21967	5.26721	9.31818	0.336066	3.4	6.12131	13.9705	5.29623	28.125	0.386885	3.86557	5.11475	6.2082	23.2721	1.17705	1.32459	0	1.55738	8.08852	39.8934	10.7951	1.63934	2.24667	18.6459	15.634	77.8415	8.27257
ESN	6.57879	6.64444	1.47172	0	0.694949	1.89899	0	0	0.615385	0	4.62222	4.99697	6.37576	6.02222	15.3488	0.929293	6.56768	7.93434	24.6323	12.1059	30.1	0.156566	4.66667	5.71212	7.38485	23.1404	4.32626	0.790909	0	2.14242	7.1303	30.6444	10.3384	0.791919	1.41919	22.8737	21.1925	57.884	8.37234
GWD	5.7177	4.76106	2.78142	0	0.315929	1.82832	0.519469	0	0	0.688073	3.12478	6.39469	7.48761	6.70531	24.2208	0.463717	9.20796	11.1469	21.2628	7.4186	32.7536	0.761062	2.76814	2.76106	9.80177	25.7372	0.818584	0.478761	0.103604	3.38727	4.32545	36.8855	9.77982	0.507339	2.83426	29.5393	24.6466	53.7787	8.61904
LWK	4.69394	9.47677	1.52222	0.945455	0.153535	1.15657	0	0.638298	0	1.65938	6.09495	3.29394	5.24848	5.04242	10	0.515152	7.56869	9.35859	17.301	8.06444	36.8822	0.180808	2.43333	4.59394	9.64646	23.7727	2.28586	0.0909091	0.890816	1.50206	12.4753	29.7485	11.8443	0.48866	1.24286	23.7283	17.722	80.1441	9.01341
MSL	7.82235	4.71176	2.78588	0	0.744706	2.23529	0.667059	0.617284	0	0.2275	5.65765	6.39059	6.21059	5.68118	24.3243	1.75176	10.4953	12.6859	25.2835	4.93151	31.5255	0.174118	2.88824	4.18941	6.78588	25.8388	1.69294	0.116471	0	1.50833	4.74524	38.0048	14.9095	0.794048	2.38675	22.7176	19.4452	74.3622	9.22778
YRI	5.12593	7.63704	3.36667	0	0.937037	2.23519	0.494444	0	0	0.871569	3.05648	5.08704	5.4963	4.19907	10.352	1.51389	8.90185	11.8074	26.1731	14.8943	40.0472	0.326852	3.93611	5.62037	9.73056	22.8583	2.85093	0.655556	0	3.53551	7.81776	31.6636	11.666	0	1.85327	19.6454	12.1133	72.6707	9.09072
CEU	7.78788	3.48081	0	7.53232	1.87071	0	0.918182	1.55	3.50877	0.394898	13.6657	0	20.2929	16.0909	12.8724	0.121212	4.65253	5.84545	9.06667	4.81277	16.6667	0.469697	4.81818	6.23838	12.1616	18.8343	0	0.419192	3.48854	1.07374	10.704	44.0485	16.6857	0.376768	3.19899	2.1	24.2266	75.1702	9.15614
FIN	7.71077	3.44634	0	7.45775	1.85219	0	1.02691	1.55	3.4493	0.390949	13.5304	0	20.092	15.9316	12.8724	0.120012	4.60646	5.78758	8.9769	4.76263	16.6667	0.465047	4.77048	6.17662	12.1798	18.9112	0	0.415042	3.45294	1.06311	10.5981	43.6124	16.5189	0.373037	3.16732	2.07921	23.9742	75.4289	9.10863
GBR	7.38571	4.01978	0	7.64725	2.29231	0	1.09231	0.714286	2.59259	0.476923	13.7187	0.549451	20.9077	15.7505	6.67258	0.198901	4.9967	5.5044	13.022	4.67529	23.3333	0.494505	4.6044	6.06593	11.4802	21.2978	0	0.743956	6.57386	1.60879	9.33626	51.089	21.5593	0.907692	2.52637	3.31319	21.6126	71.9591	9.56568
IBS	5.41495	2.83178	0.243925	7.95421	2.39252	0.208411	1.2972	2.22737	4.14767	0.997196	15.9075	0	23.7832	19.0804	7.93788	0.404673	6.58879	7.33458	13.4439	5.144	10	0.313084	3.60374	6.07664	10.8551	20.3421	0	0.272897	2.13398	0.837736	5.15377	33.534	14.5509	0.892453	2.1972	6.46542	16.5096	77.5086	8.91802
TSI	3.95327	2.80093	0	8.28318	3.03925	0	0.843925	3.91122	3.63014	0.779439	15.9121	0	26.5056	20.6234	4.4	0.516822	3.80467	5.00093	11.2897	7.12222	17.9487	0.608411	4.31121	7.19346	11.1439	20.0215	0	0.469159	5.66699	3.15607	7.58972	49.5346	17.116	1.45607	2.23551	10.4897	17.3284	83.9784	9.96326
CLM	6.17766	3.66277	0.730851	2.94574	3.53404	0.605319	0.987234	3.87674	3.57321	0.46383	9.23617	0	14.2053	11.0479	4.05574	0.585106	4.68298	5.78723	10.4394	5.26742	17.7094	0.201064	3.05319	6.00426	9.41489	20.7468	0.2	0.42766	3.83511	0.7	5.87021	41.467	14.8543	0.308511	2.93617	6.84149	27.8989	78.8596	8.59051
MXL	4.6	4.32969	0.275	5.36875	5.8125	0.265625	0.654687	3.5931	4.21053	0	8.82969	0	9.31875	6.71719	4.97174	0.626563	2.40313	3.38437	11.0516	7.46557	8	1.54062	5.32969	8.88281	14.7297	19.675	0.176563	0.13125	3.55156	0.4875	13.0297	35.0391	18.0406	0.982812	2.3125	5.23438	31.1274	75.9661	8.66042
PEL	6.15181	6.91647	0	5.94353	3.30471	0	0.241176	0.724638	4.65116	0	4.75765	0	3.52353	2.09294	2.40208	3.56471	2.68941	2.78824	11.7529	9.72267	9.67742	0.410588	2.55059	4.49647	9.39765	17.6247	0	0.264706	4.08235	0.42	11.6365	46.1247	19.6588	0.147059	2.49412	5.26118	32.5493	77.0616	8.01579
PUR	6.60288	4.35865	0.454808	3.39327	2.97404	0.309615	0.814423	0.361957	2.20588	1.30192	10.5048	1.47404	15.4481	11.1298	5.84571	1.00288	4.53654	5.14038	10.9663	5.7134	16.2162	1.37308	5.31346	6.975	11.326	19.9356	0.253846	0.196154	2.46569	1.99423	10.4202	42.9952	13.9952	0.614423	3.12692	8.07115	22.4408	78.2394	8.83993
BEB	3.56977	6.77326	0	3.66047	2.74186	0	1.8686	0	0.555	2.38214	20.6209	0	6.93023	6.22907	4.84697	0.189535	6.01163	10.1802	29.9337	5.17571	17.9487	0.40814	3.69884	5.04651	11.1395	22.0081	0.194186	0.205814	13.1706	3.58721	5.09651	36.8186	13.5837	0.724419	3.47326	11.1884	16.5081	78.5953	9.36116
GIH	3.92233	7.44854	0	3.59806	2.48447	0	1.60388	2.57128	1.13208	1.63039	24.8165	0.990099	9.51845	8.68252	5.50909	0	9.13398	12.7408	25.7602	2.06129	15.3846	0.518447	2.72913	2.6165	12.165	19.9408	0.0330097	0.192233	15.2475	1.14272	7.06505	46.6165	18.9883	0.406796	5.5165	10.6476	29.3376	76.7337	10.3189
ITU	2.72843	7.19608	0	2.6049	2.13137	0	1.27255	2.01383	2.67857	2.33861	23.7029	0.49505	7.5402	6.13039	0	0.095098	6.54706	12.8069	41.5039	1.66207	22.7273	0	4.96078	5.17353	9.17353	18.6343	0	0.206863	12.9851	1.34706	6.61471	43.3412	20.4765	2.13333	3.90196	14.4216	20.078	82.87	10.2709
PJL	2.21458	7.31146	0	4.06146	3.92813	0	1.96979	1.2234	0	0.410526	20.451	0.702105	8.73229	8.06667	4.91944	0	8.19792	11.5198	24.2042	4.48046	9.67742	0.867708	5.41771	5.15208	12.3865	23.6927	0	0.153125	7.04842	1.24063	8.51667	35.3292	17.0823	0.771875	2.35938	13.0927	24.3674	77.3687	9.50831
STU	2.18922	7.16569	0	3.16275	3.45784	0	1.35098	1.79348	1.25	2.76768	23.651	0.577228	8.13529	7.19412	3.89028	0	8.85882	13.1176	31.8157	3.73294	16.6667	0.496078	5.15784	6.00588	10.5588	20.1951	0	0.0578431	12.494	2.55941	1.86931	45.9119	17.7812	0.331683	2.05842	11.3892	26.6071	76.311	10.0835
CDX	6.79348	6.41505	0	6.61828	3.98172	0	0	0	0	0.0978495	2.9914	1.20482	0.255914	0.0892473	0.187692	0	1.26022	2.41505	15.7452	7.27386	20.3125	0.483871	5.80215	6.91828	11.1419	27.8613	0	0.197849	19.614	0.255914	3.93226	65.2398	20.6699	0.194624	4.09677	21.8935	15.2393	84.3416	9.55971
CHB	5.40194	8.07573	0	7.00291	3.88544	0	0.324272	0	0.30303	0	5.27864	0	0.141748	0.164078	1.49846	0.205825	2.90971	3.15631	11.1612	7.75392	11.1111	0.391262	8.07864	9.87476	9.01553	27.4786	0	0.133981	16.9621	2.21068	8.02136	45.1709	19.8243	0.391262	2.7233	17.8621	13.0408	86.9898	8.93805
CHS	4.87048	7.63905	0	6.31429	4.44857	0	0	2.50319	0	0	3.70571	0	0.528571	0.531429	5.36377	0.127619	2.44095	2.38095	11.3295	5.71717	24.5902	0	7.33238	7.29619	9.93905	31.7762	0	0.312381	13.4567	1.34476	9.16731	52.2269	20.8135	2.49231	2.22571	17.5981	13.5475	80.1545	9.18315
JPT	3.97981	9.9	0	5.71538	4.6375	0	0	1.40421	0	0.0990385	2.76346	0.892857	0.55	0.168269	8.08788	0.296154	1.91346	1.7375	10.8827	9.40808	27.8689	0.302885	9.77308	10.8654	10.0337	31.8077	0	0.677885	14.0288	1.72981	4.31635	46.7923	19.7808	0.558654	2.39904	19.3731	15.7663	82.7386	9.43295
KHV	3.96146	4.67576	0	4.88081	6.14646	0	0	0.526316	0	0	3.23333	0	0.359596	0.216162	0.939437	0.315152	2.01717	2.45758	16.9273	5.92292	15.5047	0.342424	5.82424	8.24343	8.65657	25.0687	0.0525253	0.786869	19.7152	0.664646	6.11313	60.3475	25.1687	1.96768	4.26566	19.7051	10.9835	80.9347	9.25267
Average Variant Frequency (%)	5.41408	6.01831	0.665093	4.09095	2.71203	0.533863	0.714736	1.27862	1.52036	0.745463	10.4522	1.61952	9.28447	7.53906	7.80436	0.602121	5.40857	7.2104	17.9335	6.69588	21.6111	0.448969	4.62617	5.9897	10.2609	22.8718	0.641958	0.388308	6.9964	1.68848	7.59716	42.7816	16.5893	0.790073	2.79027	14.1537	20.5555	76.5437	9.18607
