# Supplementary material
Source: HighWire-hosted journal article supplement (doi:10.1101/rna.078925.121)
Supplement: Supplemental_Table_S5.xlsx [file Supplemental_Table_S5.xlsx]

## Sheet: Sheet1
Supplemental Table S4. 1000 Genomes Project populations.
African	ASW	African Ancestry in Southwest US
African	ACB	African Caribbean in Barbados
African	ESN	Esan in Nigeria
African	GWD	Gambian in Western Division, The Gambia
African	LWK	Luhya in Webuye, Kenya
African	MSL	Mende in Sierra Leone
African	YRI	Yoruba in Ibadan, Nigeria
American	CLM	Colombian in Medellin, Colombia
American	MXL	Mexican Ancestry in Los Angeles, California
American	PEL	Peruvian in Lima, Peru
American	PUR	Puerto Rican in Puerto Rico
East Asian	CDX	Chinese Dai in Xishuangbanna, China
East Asian	CHB	Han Chinese in Bejing, China
East Asian	JPT	Japanese in Tokyo, Japan
East Asian	KHV	Kinh in Ho Chi Minh City, Vietnam
East Asian	CHS	Southern Han Chinese, China
European	GBR	British in England and Scotland
European	FIN	Finnish in Finland
European	IBS	Iberian populations in Spain
European	TSI	Toscani in Italy
European	CEU	Utah residents with Northern and Western European ancestry
South East Asian	BEB	Bengali in Bangladesh
South East Asian	GIH	Gujarati Indian in Houston,TX
South East Asian	ITU	Indian Telugu in the UK
South East Asian	PJL	Punjabi in Lahore, Pakistan
South East Asian	STU	Sri Lankan Tamil in the UK
